# Supplementary material for: Excitatory neurotransmission activates compartmentalized calcium transients in Müller glia without affecting lateral process motility
Source: eLife. 2021 Dec 16;10:e73202. doi: 10.7554/eLife.73202 (PMC8806189; doi:10.7554/eLife.73202)
Supplement: Figure 1—source data 1. [file elife-73202-fig1-data1.xlsx]

## Sheet: Figure 1-source data 1
	Proportion processes in each IPL sublayer per field of view (Figure 1D, Tables 1 and 2)																						Process count in each IPL sublayer per field of view (Figure 1D, Tables 1 and 2)																						Number of motile/stable processes per sublayer, pooled FOVs (Figure 1E)
	P8-P9					P10-P11					P12-P17					P20+							P8-P9					P10-P11					P12-P17					P20+							P8-P9
FOV #	S1	S2	S3	S4	S5	S1	S2	S3	S4	S5	S1	S2	S3	S4	S5	S1	S2	S3	S4	S5		FOV #	S1	S2	S3	S4	S5	S1	S2	S3	S4	S5	S1	S2	S3	S4	S5	S1	S2	S3	S4	S5		category	S1	S2	S3	S4	S5
1	0.291667	0.0208333	0.0625	0.229167	0.395833	0.225806	0.290323	0.0967742	0.129032	0.258065	0.223022	0.151079	0.208633	0.172662	0.244604	0.375	0.125	0.0416667	0.25	0.208333		1	14	1	3	11	19	7	9	3	4	8	31	21	29	24	34	9	3	1	6	5		extension	80	26	54	105	145
2	0.346154	0	0.115385	0.153846	0.384615	0.266667	0.111111	0.133333	0.244444	0.244444	0.230337	0.179775	0.168539	0.179775	0.241573	0.1875	0.109375	0.1875	0.15625	0.359375		2	9	0	3	4	10	12	5	6	11	11	41	32	30	32	43	12	7	12	10	23		new process	42	12	24	31	79
3	0.25	0.05	0.1	0.15	0.45	0.254902	0.107843	0.137255	0.205882	0.294118	0.152174	0.0942029	0.202899	0.224638	0.326087	0.175	0.125	0.2125	0.1625	0.325		3	5	1	2	3	9	26	11	14	21	30	21	13	28	31	45	14	10	17	13	26		retraction	76	26	64	94	144
4	0.321429	0.0892857	0.0892857	0.214286	0.285714	0.196262	0.186916	0.17757	0.149533	0.28972	0.121739	0.113043	0.156522	0.226087	0.382609	0.181818	0.127273	0.163636	0.2	0.327273		4	18	5	5	12	16	21	20	19	16	31	14	13	18	26	44	10	7	9	11	18		lost process	37	11	11	27	36
5	0.121951	0.0731707	0.121951	0.219512	0.463415	0.205128	0.0769231	0.166667	0.115385	0.435897	0.205882	0.102941	0.161765	0.264706	0.264706	0.0952381	0.142857	0.285714	0.142857	0.333333		5	5	3	5	9	19	16	6	13	9	34	14	7	11	18	18	2	3	6	3	7		extension -> retraction	85	29	72	102	167
6	0.232558	0.162791	0.0465116	0.162791	0.395349	0.306122	0.0612245	0.142857	0.122449	0.367347	0.157143	0.114286	0.157143	0.228571	0.342857	0.0869565	0	0.173913	0.173913	0.565217		6	10	7	2	7	17	15	3	7	6	18	11	8	11	16	24	2	0	4	4	13		retraction -> extension	19	9	13	12	23
7	0.285714	0.0612245	0.122449	0.122449	0.408163	0.12766	0.12766	0.255319	0.148936	0.340426	0.153846	0.0461538	0.169231	0.2	0.430769	0.246914	0.135802	0.222222	0.160494	0.234568		7	14	3	6	6	20	6	6	12	7	16	10	3	11	13	28	20	11	18	13	19		stable	57	21	38	56	68
8	0.222222	0.0666667	0.0888889	0.244444	0.377778	0.171053	0.0657895	0.236842	0.118421	0.407895	0.189655	0.0344828	0.224138	0.189655	0.362069	0.205128	0.102564	0.166667	0.205128	0.320513		8	10	3	4	11	17	13	5	18	9	31	11	2	13	11	21	16	8	13	16	25
9	0.185185	0.0864198	0.135802	0.135802	0.45679	0.163636	0.0363636	0.2	0.181818	0.418182	0.189189	0.0675676	0.22973	0.202703	0.310811	0.329268	0.182927	0.243902	0.134146	0.109756		9	15	7	11	11	37	9	2	11	10	23	14	5	17	15	23	27	15	20	11	9
10	0.304348	0.152174	0.130435	0.195652	0.217391	0.232877	0.136986	0.191781	0.191781	0.246575	0.302326	0.139535	0.162791	0.174419	0.22093	0.166667	0.183333	0.283333	0.133333	0.233333		10	14	7	6	9	10	17	10	14	14	18	26	12	14	15	19	10	11	17	8	14
11	0.214286	0.0892857	0.142857	0.142857	0.410714	0.196721	0.204918	0.180328	0.196721	0.221311	0.326087	0.23913	0.130435	0.0869565	0.217391	0.212766	0.170213	0.148936	0.234043	0.234043		11	12	5	8	8	23	24	25	22	24	27	45	33	18	12	30	10	8	7	11	11
12	0.213333	0.0533333	0.12	0.226667	0.386667	0.227273	0.236364	0.227273	0.163636	0.145455	0.357143	0.194805	0.181818	0.142857	0.123377	0.271186	0.135593	0.169492	0.20339	0.220339		12	16	4	9	17	29	25	26	25	18	16	55	30	28	22	19	16	8	10	12	13
13	0.25	0.0833333	0.125	0.166667	0.375	0.219512	0.146341	0.280488	0.134146	0.219512	0.18	0.19	0.18	0.19	0.26	0.166667	0.1	0.266667	0.133333	0.333333		13	12	4	6	8	18	18	12	23	11	18	18	19	18	19	26	5	3	8	4	10
14	0.25	0.125	0.0833333	0.166667	0.375	0.185714	0.171429	0.242857	0.2	0.2	0.2	0.0947368	0.147368	0.221053	0.336842	0.115385	0.0384615	0.307692	0.192308	0.346154		14	6	3	2	4	9	13	12	17	14	14	19	9	14	21	32	3	1	8	5	9
15	0.333333	0	0.166667	0.0833333	0.416667	0.268817	0.107527	0.0967742	0.225806	0.301075	0.202899	0.144928	0.173913	0.115942	0.362319	0.212766	0.170213	0.148936	0.234043	0.234043		15	4	0	2	1	5	25	10	9	21	28	14	10	12	8	25	12	11	15	6	21
16	0.258065	0.0322581	0.0967742	0.193548	0.419355	0.228571	0.171429	0.228571	0.228571	0.142857	0.233645	0.149533	0.196262	0.140187	0.280374	0.271186	0.135593	0.169492	0.20339	0.220339		16	8	1	3	6	13	16	12	16	16	10	25	16	21	15	30	11	5	9	5	19
17	0.208333	0	0.1875	0.3125	0.291667	0.164557	0.126582	0.35443	0.101266	0.253165	0.223404	0.117021	0.191489	0.180851	0.287234	0.166667	0.1	0.266667	0.133333	0.333333		17	10	0	9	15	14	13	10	28	8	20	21	11	18	17	27	14	2	6	4	6
18	0.37931	0	0.206897	0.137931	0.275862	0.277778	0.1	0.244444	0.2	0.177778	0.207792	0.12987	0.207792	0.155844	0.298701	0.115385	0.0384615	0.307692	0.192308	0.346154		18	11	0	6	4	8	25	9	22	18	16	16	10	16	12	23	17	16	20	19	22
19	0.153846	0.025641	0.153846	0.179487	0.487179	0.123711	0.123711	0.206186	0.164948	0.381443	0.2875	0.175	0.15	0.125	0.2625	0.184615	0.169231	0.230769	0.0923077	0.323077		19	6	1	6	7	19	12	12	20	16	37	23	14	12	10	21
20	0.25641	0.153846	0.128205	0.166667	0.294872	0.107143	0.0833333	0.119048	0.27381	0.416667	0.255319	0	0.212766	0.319149	0.212766	0.22449	0.102041	0.183673	0.102041	0.387755		20	20	12	10	13	23	9	7	10	23	35	12	0	10	15	10
21	0.215385	0.0461538	0.123077	0.2	0.415385	0.2	0.0571429	0.114286	0.3	0.328571	0.115385	0.217949	0.205128	0.128205	0.333333	0.4375	0.0625	0.1875	0.125	0.1875		21	14	3	8	13	27	14	4	8	21	23	9	17	16	10	26
22	0.150685	0.0273973	0.0958904	0.273973	0.452055	0.206349	0.047619	0.174603	0.15873	0.412698	0.173333	0.08	0.226667	0.146667	0.373333	0.180851	0.170213	0.212766	0.202128	0.234043		22	11	2	7	20	33	13	3	11	10	26	13	6	17	11	28
23	0.190909	0.0727273	0.190909	0.327273	0.218182	0.226415	0.0943396	0.0943396	0.226415	0.358491	0.228571	0.142857	0.214286	0.128571	0.285714	0.4375	0.0625	0.1875	0.125	0.1875		23	21	8	21	36	24	12	5	5	12	19	16	10	15	9	20
24	0.265625	0.03125	0.15625	0.265625	0.28125	0.157895	0.0789474	0.236842	0.131579	0.394737	0.184615	0.107692	0.123077	0.261538	0.323077	0.180851	0.170213	0.212766	0.202128	0.234043		24	17	2	10	17	18	12	6	18	10	30	12	7	8	17	21
25	0.135417	0.0729167	0.239583	0.375	0.177083						0.326923	0.173077	0.192308	0.0961538	0.211538							25	13	7	23	36	17						17	9	10	5	11
26	0.16092	0.0804598	0.195402	0.287356	0.275862						0.145161	0.209677	0.322581	0.16129	0.16129							26	14	7	17	25	24						9	13	20	10	10
27	0.252252	0.0810811	0.198198	0.234234	0.234234						0.137255	0.156863	0.196078	0.137255	0.372549							27	28	9	22	26	26						7	8	10	7	19
28	0.166667	0.0238095	0.166667	0.202381	0.440476						0.205882	0.191176	0.25	0.132353	0.220588							28	14	2	14	17	37						14	13	17	9	15
29	0.116279	0.0813953	0.174419	0.255814	0.372093						0.129032	0.0967742	0.354839	0.16129	0.258065							29	10	7	15	22	32						4	3	11	5	8
30	0.141026	0.0897436	0.0897436	0.24359	0.435897						0.119048	0.285714	0.166667	0.309524	0.119048							30	11	7	7	19	34						5	12	7	13	5
31	0.144068	0.0932203	0.186441	0.211864	0.364407																	31	17	11	22	25	43						547	366	480	448	705
32	0.25	0.0714286	0.0714286	0.178571	0.428571																	32	7	2	2	5	12
[truncated: 25 more columns]
