# Supplementary material for: Excitatory neurotransmission activates compartmentalized calcium transients in Müller glia without affecting lateral process motility
Source: eLife. 2021 Dec 16;10:e73202. doi: 10.7554/eLife.73202 (PMC8806189; doi:10.7554/eLife.73202)
Supplement: Figure 1—source data 2. [file elife-73202-fig1-data2.xlsx]

## Sheet: Figure 1-source data 2
	Number of motile/stable processes in cytoskeletal blockers at P11-P12, pooled FOVs (Figure 1G, Table 4)						Number of stable processes in cytoskeletal blockers per FOV at P11-P12 (Figure 1G, Table 4)						Total number of processes in cytoskeletal blockers per FOV at P11-P12 (Figure 1G, Table 4)						Proportion of total processes stable in cytoskeletal blockers per FOV at P11-P12 (Figure 1G, Table 4)						Number of motile/stable processes, EGF, pooled FOVs (Figure 1H, Table 5)						Number of stable processes per cell, EGF (Figure 1H, Table 5)						Total number of processes per cell (Figure 1H, Table 5)						Proportion of total stable processes per cell (Figure 1H, Table 5)
category	ACSF	cytochalasin-D	nocodazole	cytochalasin-D + nocodazole		FOV #	ACSF	cytochalasin-D	nocodazole	cytochalasin-D + nocodazole		FOV #	ACSF	cytochalasin-D	nocodazole	cytochalasin-D + nocodazole		FOV #	ACSF	cytochalasin-D	nocodazole	cytochalasin-D + nocodazole			P8		P17				P8		P17				P8		P17				P8		P17
extension	209	50	35	5		1	11	42	40	42		1	47	54	57	42		1	0.234043	0.767442	0.701754	1		category	ACSF	EGF	ACSF	EGF		FOV #	ACSF	EGF	ACSF	EGF		FOV #	ACSF	EGF	ACSF	EGF		FOV #	ACSF	EGF	ACSF	EGF
new process	68	6	5	0		2	25	36	25	43		2	76	48	60	46		2	0.328947	0.75	0.416667	0.934783		extension	103	146	32	36		1	14	5	41	44		1	48	67	52	58		1	0.291667	0.0746269	0.788462	0.758621
retraction	247	34	31	2		3	7	33	45	67		3	55	43	91	73		3	0.127273	0.777778	0.494505	0.917808		new process	59	65	0	1		2	15	4	45	47		2	111	120	62	64		2	0.135135	0.0333333	0.725806	0.734375
lost process	57	2	4	0		4	13	46				4	73	61				4	0.178082	0.792208				retraction	121	152	11	19		3	19	2	37	35		3	84	112	51	53		3	0.22619	0.0178571	0.72549	0.660377
extension -> retraction	171	13	21	2		5	24	93				5	122	107				5	0.196721	0.654762				lost process	41	38	0	0		4	14	6	58	57		4	86	91	68	68		4	0.162791	0.0659341	0.852941	0.838235
retraction -> extension	19	3	2	0		6	25	55				6	110	84				6	0.227273	0.869159				extension -> retraction	114	173	17	16		5	14	4	27	29		5	78	88	31	36		5	0.179487	0.0454545	0.870968	0.805556
stable	196	366	110	152		7	18					7	82					7	0.219512	0.754098				retraction -> extension	17	24	1	1		6	19	3	37	40		6	118	105	42	46		6	0.161017	0.0285714	0.880952	0.869565
						8	16					8	70					8	0.228571					stable	98	25	245	252		7	3	1				7	28	40				7	0.107143	0.025
						9	20					9	93					9	0.215054
						10	15					10	70					10	0.214286
						11	11					11	79					11	0.139241
						12	11					12	90					12	0.122222
