# Supplementary material for: Excitatory neurotransmission activates compartmentalized calcium transients in Müller glia without affecting lateral process motility
Source: eLife. 2021 Dec 16;10:e73202. doi: 10.7554/eLife.73202 (PMC8806189; doi:10.7554/eLife.73202)
Supplement: Figure 2—source data 1. [file elife-73202-fig2-data1.xlsx]

## Sheet: Figure 2-source data 1
	Proportion ROIs responding per wave (Figure 2C, Table 6)						Intercompartment latency per stalk wave-associated event (Figure 2D, Table 7)
	P9-P10		P11-P12			transient #	P9-P10	P11-P12
wave #	stalks	LPs	stalks	LPs		1	0.675676	0.675676
1	0.143979	0.193333	0.12069	0.153333		2	0	0.675676
2	0.157068	0.196667	0.0837438	0.12		3	0	0.675676
3	0.204188	0.206667	0.0344828	0.0433333		4	0	1.35135
4	0.209424	0.213333	0.142857	0.176667		5	0.675676	0.675676
5	0.227749	0.23	0.0985222	0.13		6	0	0
6	0.128272	0.153333	0.128079	0.133333		7	0	0
7	0.138743	0.203333	0.101852	0.196667		8	0	0
8	0.149215	0.223333	0.0617284	0.136667		9	0	0
9	0.0549738	0.0833333	0.0740741	0.126667		10	0	0
10	0.0909091	0.12	0.0895062	0.2		11	0	0
11	0.0733138	0.14	0.0802469	0.19		12	0	0
12	0.0498534	0.0866667	0.0493827	0.09		13	-0.675676	0.675676
13	0.108216	0.153333	0.0895062	0.153333		14	0	0
14	0.134269	0.0933333	0.058642	0.1		15	0	1.35135
15	0.108216	0.126667	0.0864198	0.143333		16	-0.675676	0
16	0.112224	0.113333	0.0771605	0.19		17	0	0
17	0.124248	0.13	0.0925926	0.166667		18	0	0
18	0.1002	0.103333	0.0895062	0.16		19	0	0
19	0.11022	0.126667	0.0617284	0.226667		20	0	0
20	0.0921844	0.106667	0.0493827	0.103333		21	0	0
21	0.361204	0.323333	0.0864198	0.203333		22	0	0
22	0.394649	0.346667	0.0987654	0.196667		23	0	0
23	0.267559	0.276667	0.0679012	0.16		24	0	0
24	0.344482	0.35	0.0740741	0.173333		25	0	0
25	0.317726	0.35	0.0771605	0.17		26	0	0.675676
26	0.367893	0.353333	0.0740741	0.15		27	0	0
27	0.01	0.0433333	0.0740741	0.183333		28	0	0
28	0.035	0.0466667	0.0864198	0.18		29	0	-0.675676
29	0.02	0.04	0.101852	0.203333		30	0	0
30	0.015	0.0366667	0.058642	0.15		31	0	0.675676
31	0.0516129	0.0766667	0.0686567	0.176667		32	0	0
32	0.0451613	0.0566667	0.0537313	0.0733333		33	0	-0.675676
33	0.0387097	0.05	0.18209	0.696667		34	0	0
34	0.0290323	0.0666667	0.149254	0.526667		35	-0.675676	0
35	0.0483871	0.1	0.0567164	0.05		36	0.337838	2.02703
36	0.0354839	0.12	0.0955224	0.323333		37	0.337838	0
37	0.0258065	0.05	0.0746269	0.38		38	-0.337838	0
38	0.0212766	0.04	0.0865672	0.37		39	0.337838	0
39	0.0319149	0.06	0.140299	0.476667		40	0.337838	0
40	0.0425532	0.0333333	0.0925373	0.266667		41	1.01351	0
41	0.0212766	0.02	0.0985075	0.21		42	-0.337838	2.02703
42	0.0531915	0.0333333	0.0686567	0.25		43	-0.337838	-0.675676
43	0.0212766	0.0266667	0.0795848	0.263333		44	0.337838	0
44	0.0425532	0.04	0.0899654	0.436667		45	-0.337838	0
45	0.0212766	0.0466667	0.0865052	0.0933333		46	1.01351	0
46	0.0353535	0.0444444	0.0380623	0.143333		47	-0.337838	0
47	0.0707071	0.0488889	0.0484429	0.336667		48	-0.337838	0
48	0.0454545	0.0577778	0.0242215	0.0733333		49	0.675676	0.675676
49	0.040404	0.0888889	0.0380623	0.0766667		50	0.675676	0
50	0.0555556	0.0444444	0.0415225	0.03		51	0.675676	0
51	0.21608	0.333333	0.0415225	0.233333		52	0.675676	0
52	0.183417	0.333333	0.0276817	0.0866667		53	0	0
53	0.203518	0.316667	0.0465116	0.116667		54	0.675676	0
54	0.193467	0.353333	0.0439276	0.133333		55	0	-0.675676
55	0.0653266	0.1	0.113695	0.246667		56	0	0.675676
56	0.125	0.19	0.116279	0.233333		57	0	0
57	0.188679	0.186667	0.128535	0.22		58	-0.675676	0
58	0.127358	0.136667	0.0154242	0.0766667		59	0	0
59	0.117925	0.146667	0.143959	0.22		60	0	1.35135
60	0.15566	0.153333	0.128535	0.24		61	0	0
61	0.0990566	0.143333	0.1491	0.236667		62	0	0
62	0.113208	0.146667	0.118252	0.19		63	0	0
63	0.240991	0.44	0.0951157	0.143333		64	0	0
64	0.218468	0.42	0.102828	0.0766667		65	0	0
65	0.153153	0.28	0.0694087	0.0833333		66	0	0
66	0.177928	0.366667	0.0539846	0.0466667		67	-0.675676	0.675676
67	0.243243	0.433333	0.1125	0.163333		68	0	0
68	0.218468	0.46	0.06875	0.116667		69	0	0
69	0.220721	0.443333	0.078125	0.08		70	0	0
70	0.22973	0.473333	0.071875	0.15		71	0	0
71	0.209459	0.363333	0.071875	0.09		72	0	0.675676
72	0.150794	0.356667	0.109375	0.16		73	0	0
73	0.148148	0.343333	0.0875	0.06		74	-0.675676	0
74	0.025788	0.0533333	0.059375	0.0966667		75	0	0
75	0.017192	0.08	0.075	0.123333		76	-0.675676	0
76	0.0544413	0.07	0.05625	0.0766667		77	0	0
77	0.034384	0.0966667	0.040625	0.16		78	0	0
78	0.0401146	0.08	0.103125	0.12		79	0.675676	0
79	0.0315186	0.04	0.04375	0.08		80	0.675676	0.337838
80	0.0114613	0.05	0.084375	0.0933333		81	0.675676	-0.337838
81	0.0401146	0.0566667	0.03125	0.08		82	0	-0.675676
82	0.025788	0.0733333	0.05625	0.113333		83	0	0
83	0.0229226	0.04	0.08125	0.126667		84	0	0
84	0.034384	0.0433333	0.05	0.0766667		85	0	-0.675676
85	0.0229226	0.0866667	0.046875	0.126667		86	0	0.337838
86	0.034384	0.05	0.0625	0.0766667		87	0	0.337838
87	0.0229226	0.0466667	0.0938511	0.183333		88	0	0.337838
88	0.025788	0.05	0.0711974	0.12		89	0.337838	0.337838
89	0.0988764	0.123333	0.0776699	0.106667		90	0	-1.01351
90	0.0966292	0.123333	0.038835	0.08		91	0	-0.337838
91	0.0808989	0.133333	0.0420712	0.1		92	0	-0.675676
92	0.0719101	0.123333	0.0420712	0.0833333		93	0	1.68919
93	0.0921348	0.0633333	0.0485437	0.106667		94	0	0.675676
94	0.0741573	0.07	0.106796	0.226667		95	-0.337838	-0.675676
95	0.13354	0.286667	0.0453074	0.116667		96	1.01351	-1.68919
96	0.161491	0.246667	0.0647249	0.136667		97	0.337838	1.35135
97	0.0993789	0.186667	0.038835	0.0866667		98	0.337838	0
98	0.139752	0.2	0.0394366	0.07		99	0.337838	-0.675676
99	0.139752	0.176667	0.056338	0.0866667		100	0	0
100	0.111801	0.146667	0.0619718	0.09		101	0	0.337838
101	0.0993789	0.186667	0.0422535	0.0766667		102	0	0.337838
102	0.129771	0.213333	0.0422535	0.06		103	0	0.337838
103	0.157761	0.183333	0.0450704	0.11		104	-0.337838	0
104	0.185751	0.196667	0.0478873	0.11		105	0	1.68919
105	0.185751	0.246667	0.0394366	0.0733333		106	-0.337838	0.337838
106	0.0393939	0.0533333	0.0450704	0.0633333		107	0.675676	-0.337838
107	0.0424242	0.0633333	0.0507042	0.0833333		108	0	0
108	0.0424242	0.08	0.0535211	0.0733333		109	0	0
109	0.0242424	0.06	0.0478873	0.0666667		110	0	0
110	0.030303	0.07	0.028169	0.0466667		111	0	1.01351
111	0.0919118	0.0932642	0.0366197	0.0966667		112	2.02703	0
112	0.0735294	0.0777202	0.0104987	0.04		113	1.01351	0
113	0.0698529	0.0725389	0.023622	0.05		114	1.35135	3.04054
114	0.0680147	0.074266	0.0341207	0.05		115	0	0.337838
115	0.0882353	0.08981	0.0469799	0.123333		116	0	0
116	0.0680147	0.0656304	0.0503356	0.16		117	0	2.02703
117	0.652605	0.633333	0.057047	0.133333		118	0	1.01351
118	0.0173697	0.0566667	0.0805369	0.16		119	0	0
119	0.35732	0.366667	0.100671	0.103333		120	0	0
120	0.531017	0.436667	0.0503356	0.1		121	0	0
121	0.436725	0.356667	0.0671141	0.163333		122	0	0
122	0.163772	0.12	0.0838926	0.116667		123	0.337838	0
123	0.00992556	0.0633333	0.0402685	0.133333		124	0.337838	0
124	0.580645	0.486667	0.0939597	0.1		125	0.337838	1.52027
125	0.630273	0.543333	0.0503356	0.123333		126	0	2.19595
126	0.503722	0.423333	0.0805369	0.13		127	0	2.02703
127	0.384615	0.273333	0.0872483	0.126667		128	0	0
128	0.563275	0.44	0.0738255	0.106667		129	0.337838	2.36486
129	0.454094	0.426667	0.0677419	0.176667		130	0.337838	0
130	0.456576	0.336667	0.0774194	0.14		131	1.01351	-0.168919
131			0.0741935	0.11		132	0.337838	-0.168919
132			0.0580645	0.163333		133	0	0.337838
133			0.0451613	0.13		134	-0.337838	-2.02703
134			0.0884719	0.176667		135	-0.337838	-1.68919
135			0.0697051	0.116667		136	0	-1.35135
136			0.0670927	0.13		137	0	-0.337838
137			0.111821	0.376667		138	0	-0.675676
138			0.0670927	0.26		139	0	0.337838
139			0.0447284	0.0833333		140	0	-2.02703
140			0.0830671	0.26		141	3.37838	-1.35135
141			0.108626	0.276667		142	2.02703	0
142			0.0447284	0.126667		143	1.35135	-0.337838
143			0.115016	0.243333		144	1.35135	0
144			0.0766773	0.133333		145	0	-0.337838
145			0.0351438	0.07		146	0	-0.337838
146			0.0894569	0.246667		147	2.02703	-0.337838
147			0.086262	0.273333		148	2.02703	-0.675676
148			0.086262	0.15		149	1.35135	-0.337838
149			0.111821	0.316667		150	0.675676	1.68919
150			0.0734824	0.156667		151	0.675676	-0.337838
151			0.0383387	0.186667		152	0	-0.337838
152			0.0766773	0.1		153	-0.675676	-0.337838
153			0.0543131	0.15		154	1.35135	-1.01351
154			0.0447284	0.186667		155	0.675676	-0.675676
155			0.086262	0.366667		156	0	-0.675676
156			0.0223642	0.0533333		157	0	-0.337838
157			0.0238095	0.0666667		158	-0.506757	-1.01351
158			0	0.266667		159	0.506757
159			0.047619	0.266667		160	0.168919
160			0.0952381	0.0444444		161	0.168919
161			0.047619	0.0666667		162	-0.168919
162			0	0.2		163	0.168919
163			0	0.0222222		164	-0.168919
164			0.0238095	0.111111		165	0.168919
165			0.0238095	0.155556		166	0.168919
166			0.0238095	0.111111		167	-0.168919
167			0.0212766	0.111111		168	-0.168919
168			0.0851064	0.155556		169	0.168919
169			0.0212766	0		170	0.168919
170			0.0212766	0.0222222		171	0.168919
171			0.0638298	0.0888889		172	0.506757
172			0	0.0888889		173	-0.337838
173			0.0212766	0.0888889		174	-0.337838
174			0.0212766	0.0222222		175	-0.337838
175			0.0212766	0		176	-0.337838
176			0	0.0222222		177	0
177			0.0238095	0.177778		178	-0.337838
178			0.0238095	0.0666667		179	-0.337838
179			0	0.0444444		180	-0.337838
180			0	0.177778		181	0
181			0.0714286	0.2		182	0
182			0	0.0222222		183	0
						184	0.337838
						185	-0.337838
						186	0
						187	0.337838
						188	0
						189	0.337838
						190	0.337838
						191	0.337838
						192	-0.337838
						193	0
						194	0
						195	0
						196	0
						197	-0.337838
						198	0
						199	1.01351
						200	-0.337838
						201	-0.337838
						202	0
						203	-0.337838
						204	0
						205	0
						206	0
						207	0
						208	0.675676
						209	0
						210	-0.337838
						211	0
						212	0
						213	-0.337838
						214	0
						215	-0.337838
						216	0
						217	0
						218	-0.337838
						219	0
						220	0
						221	0
						222	-0.337838
						223	0
						224	0
						225	0
						226	0
						227	0
						228	0.337838
						229	0
						230	0
						231	0
						232	0
						233	0
						234	0
						235	0.337838
						236	0.337838
						237	-1.01351
						238	1.68919
						239	0.337838
						240	0
						241	0.337838
						242	0
						243	0
						244	0
						245	0.337838
						246	0
						247	0
						248	0
						249	0
						250	0
						251	0
						252	0
						253	0
						254	0
						255	0.337838
						256	0
						257	0.337838
						258	0.337838
						259	0
						260	0.337838
						261	0.337838
						262	0
						263	0.675676
						264	0.675676
						265	0.337838
						266	0.675676
						267	0.675676
						268	0.337838
						269	0.337838
						270	0.337838
						271	0.337838
						272	0
						273	0.675676
						274	0.337838
						275	0.337838
						276	0.337838
						277	0.337838
						278	0.337838
						279	0.675676
						280	1.68919
						281	2.02703
						282	0.337838
						283	0
						284	0.337838
						285	-0.337838
						286	0
						287	-0.337838
						288	0
						289	0.337838
						290	-0.337838
						291	0
						292	0
						293	-0.337838
						294	0
						295	0
						296	-0.337838
						297	0
						298	0
						299	0
						300	0
						301	0
						302	0
						303	-0.675676
						304	0
						305	0
						306	0
						307	0
						308	0
						309	0
						310	0
						311	0
						312	0
						313	0
						314	0
						315	0
						316	1.35135
						317	1.35135
						318	0
						319	0
						320	0.506757
						321	-0.168919
						322	1.01351
						323	-0.675676
						324	0
						325	0.675676
						326	0.675676
						327	0.675676
						328	1.85811
						329	1.85811
						330	0.168919
						331	-0.168919
						332	1.52027
						333	0.506757
						334	1.01351
						335	0
						336	0.675676
						337	-1.18243
						338	0.844595
						339	1.85811
						340	-1.85811
						341	0.168919
						342	-0.168919
						343	-0.168919
						344	0.844595
						345	0.168919
						346	0.168919
						347	-0.506757
						348	-1.85811
						349	-0.168919
						350	0.168919
						351	0
						352	0
						353	-0.337838
						354	0
						355	0.337838
						356	0
						357	0
						358	0
						359	0
						360	0
						361	-0.337838
						362	0.337838
						363	0.337838
						364	0
						365	-0.337838
						366	0
						367	-0.337838
						368	-0.337838
						369	0
						370	-0.337838
						371	0.337838
						372	0
						373	0
						374	0.337838
						375	0
						376	0
						377	-0.337838
						378	-0.506757
						379	-0.168919
						380	-0.506757
						381	1.18243
						382	1.52027
						383	1.85811
						384	0.168919
						385	-0.168919
						386	-0.506757
						387	0.168919
						388	0.168919
						389	-0.506757
						390	-0.506757
						391	-0.506757
						392	-0.506757
						393	0.506757
						394	-0.506757
						395	-0.168919
						396	0.168919
						397	-0.506757
						398	-0.168919
						399	-0.506757
						400	0
						401	0
						402	0
						403	0
						404	0
						405	0
						406	0.337838
						407	0.337838
						408	0
						409	0
						410	1.68919
						411	0.675676
						412	0.337838
						413	0
						414	0
						415	0
						416	0
						417	0
						418	0.337838
						419	0
						420	0
						421	0
						422	0
						423	0
						424	-0.337838
						425	0
						426	0
						427	0
						428	0
						429	0
						430	-0.337838
						431	0
						432	0
						433	0
						434	1.01351
						435	0
						436	0
						437	0
						438	0.337838
						439	-0.337838
						440	0.675676
						441	-0.337838
						442	-0.337838
						443	-0.337838
						444	-0.337838
						445	0
						446	1.68919
						447	0
						448	-0.337838
						449	0
						450	0
						451	0.337838
						452	-0.337838
						453	-0.337838
						454	-0.337838
						455	-0.337838
						456	-0.337838
						457	0
						458	0
						459	1.35135
						460	0
						461	0
						462	0
						463	0
						464	-0.337838
						465	0
						466	0
						467	-0.675676
						468	1.35135
						469	-0.337838
						470	1.35135
						471	1.35135
						472	-0.337838
						473	0.675676
						474	1.01351
						475	0.675676
						476	1.68919
						477	2.02703
						478	0.337838
						479	1.35135
						480	1.68919
						481	1.68919
						482	1.68919
						483	1.68919
						484	1.01351
						485	1.68919
						486	0
						487	-0.337838
						488	-0.337838
						489	0
						490	-0.675676
						491	0
						492	-0.337838
						493	0.675676
						494	0
						495	0
						496	-0.337838
						497	0
						498	0
						499	1.01351
						500	0
						501	0
						502	0
						503	-0.337838
						504	1.01351
						505	0.337838
						506	0.675676
						507	0
						508	0
						509	-0.337838
						510	0.675676
						511	1.68919
						512	1.35135
						513	1.35135
						514	2.02703
						515	0
						516	0
						517	1.68919
						518	1.01351
						519	0.337838
						520	1.01351
						521	1.01351
						522	0
						523	-0.337838
						524	0
						525	-0.337838
						526	-0.675676
						527	-0.675676
						528	0.337838
						529	0.337838
						530	1.01351
						531	0.337838
						532	0.337838
						533	-0.337838
						534	0.337838
						535	-0.675676
						536	0.337838
						537	0.337838
						538	-0.337838
						539	1.01351
						540	-0.337838
						541	0.675676
						542	0.337838
						543	0
						544	0.675676
						545	-0.337838
						546	0.337838
						547	0.337838
						548	-0.675676
						549	0.675676
						550	-1.01351
						551	1.01351
						552	0
						553	0.337838
						554	0.337838
						555	0.675676
						556	0.675676
						557	0.675676
						558	0.337838
						559	1.01351
						560	-0.675676
						561	1.01351
						562	1.01351
						563	0.337838
						564	0.337838
						565	-0.337838
						566	1.01351
						567	-0.337838
						568	-0.337838
						569	-0.337838
						570	-1.01351
						571	1.01351
						572	1.01351
						573	1.01351
						574	0.337838
						575	-0.337838
						576	-1.01351
						577	-0.675676
						578	0
						579	0.675676
						580	1.35135
						581	1.01351
						582	-0.337838
						583	0
						584	1.01351
						585	-0.337838
						586	-0.675676
						587	-0.675676
						588	1.35135
						589	-0.675676
						590	0.675676
						591	0.337838
						592	0.337838
						593	-1.35135
						594	0
						595	0.675676
						596	-0.675676
						597	-0.675676
						598	0.675676
						599	0
						600	-0.337838
						601	0.337838
						602	0
						603	0
						604	0.337838
						605	1.01351
						606	0
						607	-0.675676
						608	0.675676
						609	0
						610	1.01351
						611	-0.337838
						612	-0.337838
						613	0.337838
						614	-0.337838
						615	1.01351
						616	-0.337838
						617	0.675676
						618	0.337838
						619	0.337838
						620	1.01351
						621	-0.337838
						622	0.675676
						623	0
						624	1.01351
						625	0.675676
						626	-0.337838
						627	0.337838
						628	0
						629	0.337838
						630	1.35135
						631	-1.68919
						632	0.337838
						633	-0.337838
						634	-0.675676
						635	0
						636	-0.337838
						637	0
						638	0.337838
						639	0
						640	0
						641	1.01351
						642	0
						643	0
						644	-0.337838
						645	-0.675676
						646	0.675676
						647	0
						648	0
						649	0
						650	0.337838
						651	-0.337838
						652	1.01351
						653	0.337838
						654	0.337838
						655	-0.337838
						656	0
						657	-0.675676
						658	-0.675676
						659	-1.01351
						660	0.675676
						661	0.675676
						662	0.337838
						663	1.01351
						664	0.675676
						665	1.01351
						666	0.675676
						667	1.01351
						668	1.01351
						669	0.675676
						670	0.675676
						671	0.675676
						672	0.337838
						673	0.675676
						674	0.337838
						675	-0.675676
						676	-0.675676
						677	0.337838
						678	0.337838
						679	0.337838
						680	1.01351
						681	1.35135
						682	0.337838
						683	1.01351
						684	-0.675676
						685	0.675676
						686	0.675676
						687	0.337838
						688	0.337838
						689	0
						690	0
						691	1.35135
						692	0.337838
						693	1.01351
						694	0.337838
						695	-0.337838
						696	-0.337838
						697	0.337838
						698	-1.01351
						699	-0.675676
						700	-0.337838
						701	-1.68919
						702	0
						703	-0.337838
						704	0
						705	-1.35135
						706	-1.01351
						707	0.675676
						708	0.337838
						709	0.675676
						710	1.35135
						711	0.675676
						712	0
						713	-0.675676
						714	0
						715	-1.01351
						716	-0.337838
						717	1.01351
						718	-0.675676
						719	-0.337838
						720	0
						721	-0.675676
						722	-1.01351
						723	-1.01351
						724	-0.337838
						725	-0.337838
						726	-0.675676
						727	0.675676
						728	-0.675676
						729	-1.01351
						730	0
						731	-0.675676
						732	1.01351
						733	0.337838
						734	-0.337838
						735	-0.337838
						736	-2.02703
						737	-1.35135
						738	0
						739	0
						740	0.337838
						741	0.337838
						742	-0.337838
						743	0.337838
						744	1.01351
						745	0
						746	0.337838
						747	-0.337838
						748	-1.01351
						749	1.01351
						750	-1.35135
						751	0.337838
						752	1.01351
						753	0.675676
						754	0
						755	-1.68919
						756	-0.337838
						757	1.01351
						758	0.675676
						759	-0.675676
						760	0.337838
						761	0
						762	1.01351
						763	-0.675676
						764	-1.68919
						765	-1.01351
						766	-0.675676
						767	0.675676
						768	-0.337838
						769	0.337838
						770	0.675676
						771	1.01351
						772	-1.68919
						773	-0.675676
						774	0
						775	-0.675676
						776	0
						777	-0.675676
						778	0
						779	-0.337838
						780	0
						781	1.01351
						782	0
						783	0.337838
						784	-0.337838
						785	0.675676
						786	0.675676
						787	0.337838
						788	0
						789	0.337838
						790	0.675676
						791	-0.337838
						792	0
						793	0
						794	-0.675676
						795	0
						796	1.35135
						797	0.337838
						798	-0.675676
						799	-1.01351
						800	-1.01351
						801	-0.675676
						802	1.01351
						803	0
						804	0.675676
						805	0.337838
						806	0
						807	0.337838
						808	-0.675676
						809	1.01351
						810	0
						811	0
						812	0
						813	1.01351
						814	1.01351
						815	0
						816	-0.337838
						817	0.337838
						818	-0.675676
						819	0
						820	0
						821	0
						822	0
						823	1.01351
						824	1.01351
						825	1.68919
						826	2.02703
						827	0.337838
						828	1.35135
						829	1.68919
						830	0
						831	0.675676
						832	0.675676
						833	0.675676
						834	1.01351
						835	1.01351
						836	1.01351
						837	1.01351
						838	2.36486
						839	1.01351
						840	-0.337838
						841	1.35135
						842	2.36486
						843	0.675676
						844	1.01351
						845	1.01351
						846	1.68919
						847	0.337838
						848	1.35135
						849	1.35135
						850	1.35135
						851	1.01351
						852	1.35135
						853	1.35135
						854	2.02703
						855	2.02703
						856	0.675676
						857	1.35135
						858	0.675676
						859	0.675676
						860	1.68919
						861	1.68919
						862	2.7027
						863	1.01351
						864	0
						865	-0.675676
						866	0
						867	1.01351
						868	1.01351
						869	0.337838
						870	2.36486
						871	0.675676
						872	-0.337838
						873	0.675676
						874	0.337838
						875	0.337838
						876	0.337838
						877	1.35135
						878	0.675676
						879	0.675676
						880	1.01351
						881	1.01351
						882	1.01351
						883	1.68919
						884	1.35135
						885	2.02703
						886	1.35135
						887	1.01351
						888	2.36486
						889	-0.337838
						890	1.35135
						891	0.675676
						892	1.35135
						893	0.675676
						894	1.01351
						895	0.337838
						896	1.01351
						897	1.35135
						898	1.01351
						899	1.68919
						900	0.675676
						901	0.337838
						902	0.337838
						903	1.01351
						904	1.68919
						905	1.68919
						906	1.68919
						907	0.337838
						908	1.68919
						909	1.01351
						910	2.7027
						911	1.35135
						912	1.01351
						913	2.36486
						914	1.35135
						915	0.675676
						916	1.68919
						917	1.01351
						918	1.35135
						919	1.35135
						920	1.68919
						921	1.35135
						922	1.68919
						923	1.68919
						924	2.02703
						925	1.35135
						926	1.68919
						927	0.675676
						928	1.35135
						929	1.68919
						930	2.7027
						931	1.68919
						932	2.7027
						933	3.04054
						934	2.02703
						935	2.36486
						936	2.7027
						937	1.01351
						938	2.02703
						939	1.35135
						940	3.04054
						941	1.01351
						942	0.675676
						943	1.01351
						944	0.337838
						945	-1.01351
						946	0.675676
						947	0.675676
						948	0
						949	1.35135
						950	1.35135
						951	1.01351
						952	0.675676
						953	-0.337838
						954	1.01351
						955	0.675676
						956	1.68919
						957	0.675676
						958	0.675676
						959	1.01351
						960	0.675676
						961	0
						962	1.35135
						963	1.01351
						964	0.675676
						965	0.337838
						966	-0.675676
						967	1.35135
						968	0
						969	0.675676
						970	1.68919
						971	0.337838
						972	0.675676
						973	0
						974	0.675676
						975	0
						976	0
						977	0.675676
						978	1.35135
						979	0.337838
						980	0.337838
						981	0.675676
						982	2.02703
						983	0
						984	0.675676
						985	0.337838
						986	1.01351
						987	0.337838
						988	0
						989	0.337838
						990	1.01351
						991	-0.675676
						992	1.01351
						993	0.675676
						994	1.01351
						995	0.337838
						996	0.337838
						997	1.01351
						998	1.35135
						999	0.337838
						1000	0.675676
						1001	2.02703
						1002	2.02703
						1003	1.68919
						1004	1.68919
						1005	1.35135
						1006	1.01351
						1007	2.02703
						1008	1.01351
						1009	2.02703
						1010	1.01351
						1011	-0.337838
						1012	0
						1013	2.36486
						1014	1.35135
						1015	0.675676
						1016	0.675676
						1017	-0.337838
						1018	0.675676
						1019	1.01351
						1020	1.35135
						1021	0.675676
						1022	1.68919
						1023	2.02703
						1024	1.68919
						1025	0.675676
						1026	0.675676
						1027	1.01351
						1028	1.01351
						1029	0.675676
						1030	1.35135
						1031	1.35135
						1032	0
						1033	-0.675676
						1034	1.68919
						1035	0.675676
						1036	0.337838
						1037	1.01351
						1038	1.01351
						1039	0.337838
						1040	0.675676
						1041	1.35135
						1042	0.337838
						1043	1.68919
						1044	0
						1045	0.337838
						1046	1.01351
						1047	3.04054
						1048	0
						1049	-0.337838
						1050	0
						1051	-0.337838
						1052	1.35135
						1053	1.01351
						1054	-0.675676
						1055	-0.337838
						1056	-0.675676
						1057	-1.35135
						1058	-0.337838
						1059	0.675676
						1060	0.337838
						1061	-1.35135
						1062	-0.337838
						1063	-0.675676
						1064	-1.35135
						1065	-1.01351
						1066	-1.01351
						1067	-1.35135
						1068	-1.35135
						1069	-0.675676
						1070	-1.01351
						1071	0.337838
						1072	0
						1073	0.675676
						1074	0.337838
						1075	-0.675676
						1076	-1.68919
						1077	0
						1078	-0.337838
						1079	1.01351
						1080	-0.337838
						1081	-1.01351
						1082	-1.35135
						1083	-1.35135
						1084	-0.337838
						1085	-0.337838
						1086	0.337838
						1087	0
						1088	-1.01351
						1089	0
						1090	-0.675676
						1091	-1.35135
						1092	-0.675676
						1093	0.337838
						1094	0
						1095	0.675676
						1096	-0.675676
						1097	0
						1098	0.337838
						1099	-1.01351
						1100	0.337838
						1101	0
						1102	-0.337838
						1103	0.337838
						1104	0.337838
						1105	1.01351
						1106	1.35135
						1107	-0.337838
						1108	0.675676
						1109	0.337838
						1110	-0.337838
						1111	1.01351
						1112	1.01351
						1113	-0.675676
						1114	0.675676
						1115	1.68919
						1116	0.337838
						1117	-0.675676
						1118	0.675676
						1119	0.675676
						1120	1.01351
						1121	1.01351
						1122	0
						1123	0
						1124	0.337838
						1125	0.337838
						1126	1.01351
						1127	0.337838
						1128	1.01351
						1129	1.35135
						1130	0.675676
						1131	0.337838
						1132	0
						1133	0.337838
						1134	-0.337838
						1135	0.675676
						1136	-0.337838
						1137	1.01351
						1138	0.675676
						1139	1.35135
						1140	0
						1141	0.675676
						1142	1.01351
						1143	0.337838
						1144	1.01351
						1145	0.675676
						1146	0.337838
						1147	0.675676
						1148	0
						1149	1.01351
						1150	0.675676
						1151	0.675676
						1152	1.01351
						1153	1.01351
						1154	1.35135
						1155	1.01351
						1156	0.337838
						1157	-0.675676
						1158	0.337838
						1159	-0.337838
						1160	0
						1161	0.337838
						1162	-1.35135
						1163	1.01351
						1164	-1.35135
						1165	0
						1166	-0.337838
						1167	-0.675676
						1168	1.68919
						1169	0.675676
						1170	0
						1171	-0.675676
						1172	-0.337838
						1173	-0.337838
						1174	0.675676
						1175	0.337838
						1176	0.675676
						1177	0
						1178	0
						1179	0
						1180	-0.675676
						1181	-0.337838
						1182	0
						1183	0.675676
						1184	0
						1185	0.337838
						1186	0.675676
						1187	-0.337838
						1188	-0.337838
						1189	0.337838
						1190	0
						1191	0.337838
						1192	0.337838
						1193	-0.337838
						1194	0.337838
						1195	0.337838
						1196	-0.337838
						1197	0.337838
						1198	0.675676
						1199	0.675676
						1200	0.675676
						1201	0.675676
						1202	0.675676
						1203	0
						1204	0.337838
						1205	0.675676
						1206	0.675676
						1207	0.675676
						1208	0.675676
						1209	-0.675676
						1210	-0.506757
						1211	-0.168919
						1212	-0.168919
						1213	-0.506757
						1214	0.506757
						1215	-0.168919
						1216	-0.506757
						1217	-0.168919
						1218	-0.506757
						1219	0.168919
						1220	0.168919
						1221	-0.168919
						1222	0.168919
						1223	-0.168919
						1224	-0.506757
						1225	0.168919
						1226	-0.506757
						1227	-0.168919
						1228	-0.506757
						1229	0.168919
						1230	-0.506757
						1231	-0.168919
						1232	-0.506757
						1233	-0.168919
						1234	0.168919
						1235	1.18243
						1236	-0.168919
						1237	0.844595
						1238	-0.168919
						1239	0.168919
						1240	-0.168919
						1241	0.506757
						1242	0.506757
						1243	-0.506757
						1244	-0.506757
						1245	0.168919
						1246	-0.168919
						1247	1.18243
						1248	0.168919
						1249	0.506757
						1250	-0.506757
						1251	2.19595
						1252	0
						1253	0.337838
						1254	0
						1255	-0.675676
						1256	0
						1257	-0.337838
						1258	0
						1259	0.337838
						1260	-1.35135
						1261	-0.337838
						1262	0
						1263	0.675676
						1264	0
						1265	0.675676
						1266	0
						1267	0
						1268	1.35135
						1269	0.337838
						1270	0.337838
						1271	0
						1272	0
						1273	0.675676
						1274	0.675676
						1275	0
						1276	0.675676
						1277	0
						1278	-0.675676
						1279	-0.337838
						1280	-0.675676
						1281	0.337838
						1282	0.337838
						1283	-1.01351
						1284	0.337838
						1285	0.675676
						1286	0.337838
						1287	1.01351
						1288	0.337838
						1289	0
						1290	-0.337838
						1291	0.675676
						1292	1.01351
						1293	0.337838
						1294	0.675676
						1295	0
						1296	1.01351
						1297	0.675676
						1298	0.337838
						1299	0.675676
						1300	1.01351
						1301	0
						1302	0.675676
						1303	0.675676
						1304	1.35135
						1305	0.675676
						1306	1.35135
						1307	0.675676
						1308	1.01351
						1309	0.675676
						1310	1.35135
						1311	0.675676
						1312	0.337838
						1313	0.675676
						1314	1.01351
						1315	0.675676
						1316	0.337838
						1317	1.01351
						1318	0.337838
						1319	0.675676
						1320	1.01351
						1321	1.68919
						1322	2.02703
						1323	0.675676
						1324	0.337838
						1325	0.675676
						1326	0.337838
						1327	0
						1328	1.35135
						1329	1.68919
						1330	1.35135
						1331	1.68919
						1332	0.675676
						1333	0.675676
						1334	1.68919
						1335	2.02703
						1336	0.337838
						1337	1.01351
						1338	2.36486
						1339	0.675676
						1340	1.68919
						1341	0.675676
						1342	2.7027
						1343	0.675676
						1344	0.337838
						1345	-0.337838
						1346	1.35135
						1347	0.337838
						1348	0.337838
						1349	1.35135
						1350	0
						1351	-1.35135
						1352	0
						1353	0
						1354	-1.01351
						1355	-0.337838
						1356	-0.337838
						1357	0.337838
						1358	0.337838
						1359	0.337838
						1360	-0.337838
						1361	0
						1362	0.337838
						1363	0
						1364	0
						1365	0.337838
						1366	-0.337838
						1367	-0.337838
						1368	0
						1369	0.337838
						1370	-0.337838
						1371	0
						1372	-0.337838
						1373	-0.337838
						1374	0.337838
						1375	-0.337838
						1376	0
						1377	-0.337838
						1378	0.675676
						1379	0
						1380	0
						1381	-0.337838
						1382	0.675676
						1383	0
						1384	-0.337838
						1385	0.337838
						1386	0.337838
						1387	0.337838
						1388	-0.337838
						1389	-0.337838
						1390	0
						1391	-0.337838
						1392	1.01351
						1393	1.01351
						1394	0.337838
						1395	-0.337838
						1396	0
						1397	1.01351
						1398	0.675676
						1399	1.01351
						1400	0.675676
						1401	0.675676
						1402	0.337838
						1403	0
						1404	0
						1405	1.35135
						1406	1.01351
						1407	0.675676
						1408	0.337838
						1409	0
						1410	1.35135
						1411	1.68919
						1412	1.01351
						1413	0.675676
						1414	1.01351
						1415	1.01351
						1416	0.675676
						1417	0.675676
						1418	0.675676
						1419	0.675676
						1420	2.02703
						1421	0.337838
						1422	0.337838
						1423	1.68919
						1424	-0.337838
