# Supplementary material for: Excitatory neurotransmission activates compartmentalized calcium transients in Müller glia without affecting lateral process motility
Source: eLife. 2021 Dec 16;10:e73202. doi: 10.7554/eLife.73202 (PMC8806189; doi:10.7554/eLife.73202)
Supplement: Figure 3—source data 1. [file elife-73202-fig3-data1.xlsx]

## Sheet: Figure 3-source data 1
		Proportion ROIs responding per wave (Figure 3B, Table 8)										Fold change in average proportion ROIs responding per wave (Figure 3B, Table 9)						Z scored deltaF/F per wave-associated transient (Figure 3C, Table 10)										Fold change in average Z scored wave-associated transient amplitude (Figure 3C, Table 11)						Intercompartment latency per stalk wave-associated event (Figure 3D, Table 12)						Average interwave interval (sec, Figure 3E, Table 13)				Average wave-associated EPSC amplitude (pA, Figure 3E, Table 13)
		P9-P10				P11-P12						P9-P10		P11-P12				P9-P10				P11-P12						P9-P10		P11-P12				P9-P10		P11-P12			cell #	ACSF	pirenzepine		cell #	ACSF	pirenzepine
		ACSF		pirenzepine		ACSF		pirenzepine			FOV #	stalks	LPs	stalks	LPs			ACSF		pirenzepine		ACSF		pirenzepine			FOV #	stalks	LPs	stalks	LPs		stalk transient #	ACSF	pirenzepine	ACSF	pirenzepine		1	55.1802	57.3949		1	309.192	309.719
	wave #	stalks	LPs	stalks	LPs	stalks	LPs	stalks	LPs		1	0.312536	0.516634	0.588228	0.848913		transient #	stalks	LPs	stalks	LPs	stalks	LPs	stalks	LPs		1	0.786404	0.82221	0.953207	0.933834		1	0.675676	0	0	0.675676		2	24.5447	25.5856		2	104.288	94.0458
	1	0.143979	0.193333	0.0566038	0.09	0.128535	0.22	0.109223	0.163333		2	0.503204	0.558196	0.89041	0.910233		1	4.47769	4.96482	3.1891	4.21407	3.32609	3.73387	3.07569	3.15736		2	0.83466	0.957602	0.983635	0.990649		2	0	0	0	0.675676		3	34.2117	18.2327		3	106.068	156.6
	2	0.157068	0.196667	0.0485175	0.103333	0.0154242	0.0766667	0.0800971	0.13		3	0.492725	0.617511	0.764872	0.84296		2	3.66942	4.26996	3.08988	3.52333	3.22359	5.34357	4.49382	4.02974		3	0.91283	0.975206	0.974838	0.971755		3	0	0	0	0.675676		4	122.466	161.149		4	141.292	26.9358
	3	0.204188	0.206667	0.0404313	0.08	0.143959	0.22	0.0849515	0.13		4	0.621157	0.999001	0.955891	0.91522		3	3.56111	5.78528	3.9635	3.0497	3.17267	4.00137	3.50458	3.0007		4	0.738978	0.984846	0.993348	1.00112		4	0	2.7027	0	0.675676		5	106.216	124.775		5	155.905	79.1857
	4	0.209424	0.213333	0.0592992	0.0866667	0.128535	0.24	0.065534	0.0666667		5	0.545803	0.633152	0.987814	0.794152		4	3.9508	3.48561	3.0003	3.01365	3.33806	4.13862	3.10869	3.92401		5	0.897429	0.933093	0.967357	0.907555		5	0.675676	0	0	0.337838		6	69.4981	78.0098		6	122.274	117.347
	5	0.227749	0.23	0.0404313	0.09	0.1491	0.236667	0.0364078	0.1		6	0.372281	0.738408	1.1423	1.26968		5	3.30517	3.09696	3.23708	3.85718	3.08791	3.22646	4.21757	5.73057		6	0.745157	0.999961	1.02049	1.01684		6	0	0.337838	0.675676	0.337838		7	80.8398	78.0968		7	103.726	86.1049
	6	0.128272	0.153333	0.0696721	0.11	0.118252	0.19	0.0776699	0.116667								6	3.62564	4.22607	3.14586	3.51494	3.13523	3.11827	3.05983	3.14702								7	0	0	0	0.337838		8	62.8801	154.814		8	187.498	191.014
	7	0.138743	0.203333	0.0696721	0.143333	0.0951157	0.143333	0.0291262	0.0333333								7	3.29446	3.55122	3.58228	3.21419	5.67291	3.26931	4.06201	3.50755								8	0	0	0	0		9	44.3087	41.1642		9	474.14	504.604
	8	0.149215	0.223333	0.0860656	0.116667	0.102828	0.0766667	0.107692	0.196667								8	3.46542	3.81518	3.70569	3.49498	3.35205	3.35566	4.29004	3.7586								9	0	0	0	0		10	50.3993	67.3564		10	196.157	122.982
	9	0.0549738	0.0833333	0.0471311	0.103333	0.0694087	0.0833333	0.0861538	0.18								9	3.02255	3.4978	3.18799	4.34567	7.29337	3.94543	3.28014	4.31639								10	0	1.68919	0	0		11	27.9681	21.9595		11	97.1763	80.7316
	10	0.125	0.19	0.0614754	0.13	0.0539846	0.0466667	0.0584615	0.173333								10	3.64594	3.67728	3.53954	3.80381	3.05343	4.21255	4.11016	3.18406								11	0	0	0	0		12	34.2061	69.9324		12	162.773	176.184
	11	0.188679	0.186667	0.0635246	0.136667	0.101852	0.196667	0.0830769	0.173333								11	3.97102	3.09444	3.52777	3.4312	3.65541	4.05455	4.63439	3.36287								12	0	-0.337838	-0.675676	0		13	44.8761	71.326		13	70.3042	94.2659
	12	0.127358	0.136667	0.0860656	0.0933333	0.0617284	0.136667	0.0676923	0.15								12	3.11206	3.14175	3.11504	3.17893	3.81676	5.00066	3.79397	3.66647								13	-0.675676	0	0.675676	0
	13	0.117925	0.146667	0.0592784	0.113333	0.0740741	0.126667	0.0523077	0.173333								13	3.14517	3.09327	3.18931	3.03727	3.02675	4.36372	3.47203	3.68698								14	0	-0.337838	0	0
	14	0.15566	0.153333	0.0902062	0.146667	0.0895062	0.2	0.0553846	0.19								14	3.17255	3.01456	3.11998	3.63488	4.94591	4.62516	4.33698	3.55712								15	0	-0.337838	0	-0.675676
	15	0.0990566	0.143333	0.278351	0.473333	0.0802469	0.19	0.0615385	0.18								15	3.16687	4.48332	3.84982	3.12904	5.78518	6.31345	3.31669	6.35554								16	-0.675676	-1.01351	0	0
	16	0.113208	0.146667	0.056701	0.08	0.0493827	0.09	0.0461538	0.0766667								16	3.45055	3.43931	4.45554	3.57687	3.90027	3.05671	3.49427	4.12816								17	0	0	1.35135	-2.36486
	17	0.108216	0.153333	0.231959	0.423333	0.0895062	0.153333	0.0461538	0.12								17	3.39723	7.72701	3.63942	4.07656	3.28999	3.82331	3.64373	4.24278								18	0	0.337838	0	0
	18	0.134269	0.0933333	0.0721649	0.103333	0.058642	0.1	0.0461538	0.143333								18	3.13842	3.96159	3.10512	3.41141	3.71835	3.52301	3.13393	3.77268								19	0	-0.337838	0	0.337838
	19	0.108216	0.126667	0.108247	0.116667	0.0864198	0.143333	0.0615385	0.14								19	3.53999	4.54028	5.54468	3.4325	3.43758	5.16233	3.01066	4.80151								20	0	0.337838	0	-1.52027
	20	0.112224	0.113333	0.21134	0.336667	0.0771605	0.19	0.0184615	0.0933333								20	3.56994	4.06373	4.17059	4.52964	6.43252	3.19352	6.83855	3.83179								21	0	0	0	-0.168919
	21	0.124248	0.13	0.190722	0.406667	0.0925926	0.166667	0.0492308	0.13								21	3.91948	5.90818	3.42869	3.48604	4.78291	3.38903	3.95978	3.56605								22	0	0	0	-0.675676
	22	0.1002	0.103333	0.0463918	0.12	0.0895062	0.16	0.0338462	0.133333								22	3.74654	3.48318	3.06718	3.21772	5.07353	4.08316	3.76326	3.07649								23	0	0	0	-1.35135
	23	0.11022	0.126667	0.268041	0.45	0.0617284	0.226667	0.0338462	0.0866667								23	7.30165	3.2425	3.67031	3.03121	4.08631	4.71106	9.71289	5.47719								24	0	0	0.675676	0.337838
	24	0.0921844	0.106667	0.255155	0.436667	0.0493827	0.103333	0.0911765	0.223333								24	6.47043	5.86819	3.26246	3.50365	4.66644	4.60342	4.07332	4.11903								25	0	1.01351	0	0.844595
	25	0.652605	0.633333	0.0747423	0.146667	0.0864198	0.203333	0.117647	0.326667								25	6.56109	3.23427	3.61458	3.29637	3.13748	3.05743	3.84281	3.9785								26	0	2.36486	0	0.168919
	26	0.0173697	0.0566667	0.193299	0.32	0.0987654	0.196667	0.141176	0.376667								26	6.89354	4.72135	4.01205	3.03893	5.10328	4.71442	3.51692	3.4921								27	0	-0.337838	0	-0.168919
	27	0.35732	0.366667	0.0546318	0.08	0.0679012	0.16	0.117647	0.293333								27	8.46847	4.59296	3.28864	3.25586	3.04877	3.61419	3.3135	3.23761								28	0	0.675676	0	0.506757
	28	0.531017	0.436667	0.0570071	0.106667	0.0740741	0.173333	0.0794118	0.276667								28	3.87915	4.38765	4.50906	3.8486	6.05099	4.12562	5.74953	3.26003								29	0	2.36486	0.675676	1.35135
	29	0.436725	0.356667	0.0356295	0.106667	0.0771605	0.17	0.102941	0.286667								29	6.91284	3.943	3.01319	3.73739	3.81053	4.25309	5.88779	3.46564								30	0	0	0	-1.01351
	30	0.163772	0.12	0.030303	0.06	0.0740741	0.15	0.0882353	0.17								30	3.54561	4.0173	3.03799	3.11507	5.62043	6.0551	3.8458	4.09788								31	0	0	0	0.506757
	31	0.00992556	0.0633333	0.0424242	0.0966667	0.0740741	0.183333	0.0735294	0.17								31	4.01605	5.56185	3.17399	4.53779	4.58752	8.66498	4.83115	3.7554								32	0	0	0	0
	32	0.580645	0.486667	0.0757576	0.0933333	0.0864198	0.18	0.0529412	0.14								32	4.37967	3.84449	3.17143	3.31452	3.8132	5.14808	3.3139	3.2791								33	0	0.675676	0	-1.68919
	33	0.630273	0.543333	0.0515152	0.04	0.101852	0.203333	0.0328283	0.1								33	5.66012	4.51668	5.0923	4.23075	4.7201	7.79112	4.94882	3.77904								34	0	-0.675676	0	1.68919
	34	0.503722	0.423333	0.0818182	0.09	0.058642	0.15	0.0555556	0.11								34	3.41498	3.79073	3.76504	3.11086	3.0563	3.33475	9.90111	3.76524								35	-0.675676	0	0	0
	35	0.384615	0.273333	0.0848485	0.0933333	0.0686567	0.176667	0.0555556	0.136667								35	6.04581	3.92774	3.67904	3.98972	3.37799	3.11386	4.12239	3.64898								36	0.337838	0.675676	0	0
	36	0.563275	0.44	0.0848485	0.153333	0.0537313	0.0733333	0.0757576	0.136667								36	3.22638	3.97625	3.85182	4.69033	3.20865	5.39914	6.88691	3.52721								37	0.337838	1.35135	0.337838	0
	37	0.454094	0.426667	0.0818182	0.106667	0.18209	0.696667	0.0530303	0.13								37	5.2557	3.63363	4.51345	4.03517	3.05271	3.29947	3.999	3.86302								38	-0.337838	-0.675676	-0.337838	0.337838
	38	0.456576	0.336667	0.103448	0.236667	0.149254	0.526667	0.0328283	0.176667								38	3.04724	4.80008	3.347	3.72665	3.1068	4.28868	4.36053	3.5439								39	0.337838	0	-0.675676	0.337838
	39	0.0988764	0.123333	0.12069	0.266667	0.0567164	0.05	0.0505051	0.183333								39	3.8959	5.62279	3.10278	5.67705	3.1919	3.28937	4.22193	3.70846								40	0.337838	0	0	0.337838
	40	0.0966292	0.123333	0.115764	0.3	0.0955224	0.323333	0.0479798	0.156667								40	5.83907	3.96426	3.54567	3.86625	3.11877	3.61863	3.16477	3.31581								41	1.01351	0.337838	0	0
	41	0.0808989	0.133333	0.1133	0.27	0.0746269	0.38	0.0580808	0.153333								41	3.20547	3.11699	3.60665	6.57571	3.54991	4.09434	3.31563	4.61274								42	-0.337838	0.337838	-0.675676	0.506757
	42	0.0719101	0.123333	0.0647321	0.0866667	0.0865672	0.37	0.0681818	0.14								42	3.38786	4.14222	4.51302	3.21342	3.27747	3.61249	4.29118	3.45072								43	-0.337838	0.675676	0.337838	0
	43	0.0921348	0.0633333	0.0558036	0.05	0.140299	0.476667	0.040404	0.153333								43	3.5853	3.28693	3.93087	4.13407	3.69745	3.37603	5.89493	6.34123								44	0.337838	1.35135	0.337838	0.337838
	44	0.0741573	0.07	0.03125	0.0666667	0.0925373	0.266667	0.0505051	0.07								44	3.41266	4.54518	7.49515	3.42979	3.53138	3.13001	3.18723	3.67207								45	-0.337838	0.675676	0.337838	-0.675676
	45	0.0862534	0.103333	0.0401786	0.06	0.0985075	0.21	0.0782828	0.216667								45	5.51943	5.70152	3.16001	3.96438	3.53269	3.88317	3.23295	3.69874								46	1.01351	-0.675676	0.337838	0
	46	0.0808625	0.12	0.0379464	0.0533333	0.0686567	0.25	0.1	0.12								46	3.90753	4.34823	3.43829	4.91213	4.14615	3.13232	3.00818	3.44779								47	-0.337838	-0.337838	-1.01351
	47	0.240991	0.44	0.0535714	0.08	0.019337	0.0566667	0.0677419	0.153333								47	4.63323	4.20466	3.76078	3.7289	3.38338	4.49516	3.15004	3.80837								48	-0.337838	-0.337838	-0.337838
	48	0.218468	0.42	0.0446429	0.0633333	0.0248619	0.0433333	0.0774194	0.06								48	5.84251	6.99608	4.41074	3.20859	3.01472	3.99493	3.11048	3.10167								49	0.675676	0	-0.675676
	49	0.153153	0.28	0.116337	0.22	0.0220994	0.0733333	0.0645161	0.0866667								49	3.77427	4.44395	3.0629	3.56084	4.93296	3.8105	3.25716	3.43499								50	0.675676	-1.35135	1.68919
	50	0.177928	0.366667	0.126238	0.26	0.0303867	0.04	0.0516129	0.113333								50	3.25579	6.07298	3.44649	3.54307	3.68546	6.02169	3.15362	3.32986								51	0.675676	-0.675676	0.675676
	51	0.243243	0.433333	0.0240175	0.03	0.0220994	0.0566667	0.0548387	0.14								51	3.04541	3.85908	4.14286	3.13955	3.76827	3.34061	3.01838	3.53841								52	0.675676	0.675676	-0.675676
	52	0.218468	0.46	0.0422535	0.07	0.0303867	0.06	0.0677419	0.123333								52	3.12818	3.00016	4.11863	3.28829	3.00911	3.39481	4.29081	3.18031								53	0	0	-1.68919
	53	0.220721	0.443333	0.0610329	0.0566667	0.0331492	0.0566667	0.0516129	0.136667								53	4.19239	3.37074	3.90145	4.92109	5.0297	5.58193	3.18211	4.30613								54	0.675676	-0.337838	1.35135
	54	0.22973	0.473333	0.0422535	0.0533333	0.0303867	0.0533333	0.0548387	0.1								54	5.04336	3.05619	3.1695	3.65679	3.15615	3.48799	3.64873	4.57875								55	0	-2.7027	0
	55	0.209459	0.363333	0.0399061	0.04	0.0276243	0.05	0.0645161	0.193333								55	5.26606	4.81964	3.52213	3.05209	3.52082	3.58325	3.08144	5.54316								56	0	-2.36486	-0.675676
	56	0.407216	0.366667	0.0234742	0.06	0.0441989	0.0333333	0.083871	0.11								56	4.41639	4.7588	3.10191	3.56932	3.74876	3.66698	3.09825	4.14665								57	0	0.675676	0
	57					0.0359116	0.0366667	0.0419355	0.186667								57	6.51898	4.67095	3.48196	3.8301	3.844	3.95535	3.31915	3.21211								58	-0.675676	1.01351	0.337838
	58					0.0248619	0.0333333	0.0645161	0.166667								58	8.30236	5.33508	3.02471	3.04716	3.08029	4.28995	6.00689	3.06916								59	0	0	0.337838
	59					0.0248619	0.04	0.0516129	0.166667								59	4.7586	3.83978	3.25292	3.90303	4.96126	4.09178	3.64158	3.30195								60	0	0	0.337838
	60					0.0248619	0.0566667	0.0483871	0.146667								60	4.60043	4.63669	3.1664	4.18538	3.41616	4.75209	3.14286	3.27919								61	0	0.675676	0
	61					0.0138122	0.05	0.0451613	0.1								61	3.19745	3.11307	3.0692	3.46286	5.50413	3.06342	3.13067	3.43091								62	0	0.168919	1.68919
	62					0.038674	0.0566667	0.104762	0.133333								62	3.55917	4.78722	3.03468	3.41574	5.76836	7.50925	3.3703	3.06581								63	0	-1.18243	0.337838
	63					0.0469799	0.123333	0.0603175	0.143333								63	8.42596	3.04061	3.9894	3.92739	8.08319	5.54186	4.53096	5.04646								64	0	0.506757	-0.337838
	64					0.0503356	0.16	0.0603175	0.126667								64	6.04693	3.43629	3.27266	3.1297	3.21893	5.59721	3.0336	3.14766								65	0	-1.18243	0
	65					0.057047	0.133333	0.047619	0.1								65	4.86641	3.29599	3.45017	5.05797	3.90081	3.60392	3.20705	3.40406								66	0	-0.168919	0
	66					0.0805369	0.16	0.0793651	0.193333								66	4.94429	3.68696	3.33813	4.11594	3.43058	3.48178	5.54314	3.75915								67	-0.675676	-0.168919	0
	67					0.100671	0.103333	0.0571429	0.103333								67	5.91201	3.02717	3.09605	3.76032	6.13748	6.62834	4.31406	3.71079								68	0	-1.18243	1.01351
	68					0.0503356	0.1	0.0507937	0.143333								68	4.10766	3.57624	3.12598	3.70261	4.56104	3.32327	6.40466	3.13698								69	0	-0.168919	0
	69					0.0671141	0.163333	0.0444444	0.143333								69	3.58199	3.69672	3.10632	3.01932	4.12976	3.89436	4.13512	3.39784								70	0	-0.168919	0
	70					0.0838926	0.116667	0.11746	0.42								70	3.3482	3.01363	4.21835	3.01153	8.01656	3.22618	3.89056	3.9733								71	0	0.168919	3.04054
	71					0.0402685	0.133333	0.0825397	0.14								71	3.91453	3.00466	5.32093	3.69556	4.66748	3.79274	5.15236	5.34155								72	0	-0.844595	0.337838
	72					0.0939597	0.1	0.0793651	0.196667								72	4.04347	3.51014	3.05731	3.02385	4.21856	3.13859	3.22459	3.05607								73	0	-1.18243	0
	73					0.0503356	0.123333	0.0539683	0.11								73	3.34585	6.24654	3.16881	3.20201	4.8	4.09094	3.0474	3.14568								74	-0.675676	-0.675676	2.02703
	74					0.0805369	0.13	0.0698413	0.18								74	3.90009	7.33198	3.53439	3.00836	3.1417	3.6535	11.0109	3.07221								75	0	-0.337838	1.01351
	75					0.0872483	0.126667	0.0698413	0.15								75	4.97386	7.55969	3.48091	3.46817	3.86463	4.13961	3.11517	3.42236								76	-0.675676	-0.675676	0
	76					0.0738255	0.106667	0.0666667	0.103333								76	3.71509	3.90961	5.25621	3.32456	4.1287	4.03447	3.35513	3.09717								77	0	-0.337838	0
	77					0.0938511	0.183333	0.0698413	0.146667								77	4.54615	4.24651	3.08676	3.15641	3.83511	3.40676	4.0538	3.50407								78	0	0.337838	0
	78					0.0711974	0.12	0.0539683	0.106667								78	3.06575	3.07036	3.6523	3.24353	3.18477	3.85697	3.17604	3.14544								79	0.675676	0.675676	0
	79					0.0776699	0.106667	0.0761905	0.29								79	4.17934	4.71469	4.1255	3.98693	3.23525	3.59101	3.33326	4.12916								80	0.675676	0.337838
	80					0.038835	0.08	0.0571429	0.173333								80	4.98611	3.2409	3.04816	4.70746	3.28174	3.4176	3.47508	3.01736								81	0.675676	-0.337838
	81					0.0420712	0.1	0.047619	0.13								81	3.8044	3.25983	3.88176	3.47928	4.35064	3.59805	3.23672	3.19427								82	0	0.337838
	82					0.0420712	0.0833333	0.0571429	0.0933333								82	3.11905	5.04555	5.16764	3.86455	3.25859	4.2584	3.57806	4.15993								83	0	0.675676
	83					0.0485437	0.106667	0.12381	0.296667								83	4.21815	3.56821	3.05808	3.08198	3.68784	3.88663	3.52129	3.61027								84	0	-1.01351
	84					0.106796	0.226667	0.0825397	0.11								84	5.99378	3.69061	4.14086	3.2412	3.2455	3.19961	3.04552	3.21718								85	0	-1.01351
	85					0.0453074	0.116667	0.0539683	0.0933333								85	3.38574	5.77882	3.96734	3.38265	4.09711	3.03976	5.1424	5.10606								86	0	-0.675676
	86					0.0647249	0.136667	0.104762	0.273333								86	4.28962	5.25454	3.26279	3.81625	8.23468	3.61118	4.96428	4.48721								87	0	-0.675676
	87					0.038835	0.0866667	0.0250627	0.0466667								87	3.4	4.23758	3.01319	3.05841	7.93135	4.64921	3.84629	3.83751								88	3.37838	-0.337838
	88					0.0275	0.03	0.0701754	0.103333								88	3.12531	3.37166	4.50315	4.48182	5.29205	3.12749	4.27532	4.48009								89	2.02703	-0.675676
	89					0.015	0.0133333	0.0350877	0.09								89	3.47685	3.97766	3.1549	3.06579	8.68322	5.88929	3.08389	3.03462								90	1.35135	0
	90					0.0125	0.0233333	0.0576441	0.07								90	5.43676	3.1438	4.07795	3.42044	3.59259	3.20192	3.03996	3.59975								91	1.35135	0.675676
	91					0.0677419	0.176667	0.0426065	0.0366667								91	3.15296	5.82412	3.94565	4.21102	5.1151	3.47689	4.20739	3.11128								92	0	0.675676
	92					0.0774194	0.14	0.0300752	0.03								92	3.02723	3.92216	4.23852	3.21227	5.94856	3.77004	3.22934	4.40876								93	0	0.675676
	93					0.0741935	0.11	0.0300752	0.05								93	6.0334	4.0809	3.90447	3.89316	3.1283	3.15442	3.04814	3.53739								94	2.02703	0.675676
	94					0.0580645	0.163333	0.0802005	0.0833333								94	6.55727	3.77436	3.37392	3.06902	3.25641	5.45939	3.37639	4.44313								95	2.02703	-0.675676
	95					0.0451613	0.13	0.0651629	0.0633333								95	7.13268	3.69498	3.42252	3.06545	3.048	4.07036	3.23205	4.49406								96	1.35135	0
	96					0.0877193	0.09	0.0325815	0.0433333								96	6.49554	5.02535	4.67379	4.24819	3.19853	4.35596	3.5939	4.41023								97	0.675676	0.337838
	97					0.105263	0.123333	0.0100251	0.0366667								97	5.23293	3.36416	4.47723	3.50489	3.95861	3.18071	4.17766	3.47006								98	0.675676	0.675676
	98					0.0175439	0.0466667	0.0250627	0.0333333								98	5.45799	5.03347	3.23627	3.31818	3.37103	4.49781	9.15018	3.16446								99	0	0.337838
	99					0.0175439	0.02	0.0200501	0.04								99	7.53908	4.07615	3.95213	3.86921	5.05708	3.0736	5.81605	3.16954								100	-0.675676	1.35135
	100					0.0551378	0.09	0.037594	0.0566667								100	5.40063	3.02541	3.0305	4.0057	3.60418	4.5539	8.33108	4.96885								101	1.35135	0.675676
	101					0.0401003	0.0733333	0.0250627	0.0366667								101	3.27528	3.99207	3.57865	3.27746	3.17325	3.15793	3.18332	4.02563								102	0.675676	0.337838
	102					0.0350877	0.0333333	0.0300752	0.0566667								102	6.9955	3.17738	3.08794	3.04855	4.03875	3.80383	4.69462	3.18703								103	0	1.68919
	103					0.0175439	0.0366667	0.0300752	0.0633333								103	4.15984	3.91124	3.13088	3.29891	3.02534	3.28097	4.39843	3.52199								104	0	2.02703
	104					0.0250627	0.03	0.047619	0.0466667								104	15.4534	3.32397	3.01982	3.08231	3.47119	3.435	3.39659	3.16635								105	0.506757	1.35135
	105					0.0250627	0.08	0.0333333	0.116667								105	7.16226	3.5936	3.62199	3.61971	3.26672	3.31091	3.93287	3.11826								106	0.168919	1.35135
	106					0.0300752	0.0333333	0.0266667	0.13								106	3.73171	5.07787	3.06466	4.5188	4.39797	5.06764	3.28382	3.43237								107	0.168919	1.68919
	107					0.0250627	0.0366667	0.0166667	0.15								107	6.79603	5.90948	3.42791	3.46866	3.17814	5.98128	3.17702	3.12892								108	-0.168919	1.01351
	108					0.0100251	0.03	0.05	0.106667								108	6.71795	3.03329	4.76939	4.31024	3.68699	7.53024	3.32872	3.3028								109	0.168919	3.37838
	109					0.0200501	0.04	0.0466667	0.0833333								109	6.57937	3.60707	3.13149	3.84697	3.72713	5.03439	4.39511	3.47551								110	-0.168919	3.37838
	110					0.0350877	0.05	0.05	0.09								110	5.44693	3.0074	3.29786	5.50082	4.0667	3.67689	3.10292	3.49888								111	0.168919	0
	111					0.0275689	0.0566667	0.06	0.0866667								111	8.34424	4.82081	3.222	4.5868	3.55549	3.17164	3.01654	3.09043								112	0.168919	1.68919
	112					0.0350877	0.0533333	0.06	0.0833333								112	6.42376	4.14189	3.12734	3.13313	3.02183	3.19081	4.61248	4.03466								113	-0.168919	1.01351
	113					0.0426065	0.0566667	0.05	0.11								113	3.78492	3.06944	3.13419	3.24219	3.34575	3.12736	7.50331	3.83644								114	-0.168919	0
	114					0.0426065	0.0433333	0.07	0.146667								114	3.36681	5.83058	3.0004	3.37103	3.85297	5.11181	4.16554	3.93154								115	0.168919	3.04054
	115					0.0501253	0.03	0.08	0.0933333								115	8.29042	5.5095	4.01475	3.89238	4.85287	3.63758	5.0575	3.06506								116	0.168919	-0.337838
	116					0.0526316	0.0533333	0.0966667	0.0733333								116	5.27188	4.86389	3.11555	4.29742	3.85539	3.88271	3.42758	3.66333								117	0.168919	0.337838
	117					0.0651629	0.133333	0.0633333	0.0833333								117	7.30761	4.27631	4.08041	4.80942	3.95264	5.03837	3.91629	3.12163								118	0.506757	0.337838
	118					0.0551378	0.0933333	0.0566667	0.106667								118	5.32484	4.13639	3.64374	4.43802	3.1207	3.35779	3.70037	3.2369								119	-0.337838	-1.01351
	119					0.0350877	0.0466667	0.0466667	0.106667								119	6.9904	3.01065	3.82349	3.24912	3.01321	3.69039	3.42244	4.32975								120	-0.337838	-0.337838
	120					0.0300752	0.0333333	0.106667	0.113333								120	3.54802	3.85928	3.64502	3.84505	4.06069	6.16319	3.11645	3.04701								121	-0.337838	0
	121					0.0225564	0.0466667	0.08	0.09								121	3.16004	4.14103	3.10889	3.03234	3.76989	5.56388	3.29477	3.13801								122	-0.337838	1.68919
	122					0.0401003	0.0466667	0.0666667	0.116667								122	3.08929	3.94979	3.3323	4.17278	3.30154	5.64635	4.47166	3.41889								123	0	-0.337838
	123					0.0526316	0.05	0.0633333	0.163333								123	6.50439	3.00343	3.3535	4.27861	5.46873	7.6956	4.33629	3.59722								124	-0.337838	-0.844595
	124					0.0350877	0.0533333	0.0566667	0.106667								124	3.74005	3.3934	3.10538	3.59752	4.30274	3.23794	3.62189	7.83284								125	-0.337838	0.506757
	125					0.0350877	0.0433333	0.0633333	0.113333								125	3.39097	6.17469	3.31612	3.61921	4.99396	3.13961	3.41369	5.76194								126	-0.337838	-0.168919
	126					0.037594	0.0433333	0.0733333	0.14								126	3.44709	4.43215	4.17673	4.23001	3.79749	5.5549	9.53404	4.33517								127	0	-0.506757
	127					0.0451128	0.0366667	0.0833333	0.15								127	3.10971	3.54116	3.34979	4.23166	3.61944	3.31369	6.6159	4.31055								128	0	0.168919
	128					0.0175439	0.0266667	0.0833333	0.13								128	3.31152	3.30308	3.58	3.08003	3.2642	4.57247	4.5349	9.31844								129	0	-0.168919
	129					0.0275689	0.0533333	0.0933333	0.126667								129	3.3971	3.27068	3.11194	3.39534	5.57584	3.32367	7.19058	3.67507								130	0.337838	-0.506757
	130					0.0401003	0.0533333	0.0766667	0.133333								130	3.69572	3.94471	3.47655	3.11359	3.64263	3.29858	7.00183	6.00975								131	-0.337838	3.5473
	131					0.0350877	0.0466667	0.0733333	0.136667								131	3.09556	3.87182	3.13383	3.41172	4.27718	3.46574	3.02283	4.55974								132	0	0.506757
	132					0.0250627	0.0266667	0.0533333	0.136667								132	3.38425	5.26999	3.02157	3.15876	4.37347	3.1235	3.68151	5.03818								133	0.337838	-0.506757
	133					0.0325815	0.02	0.0766667	0.13								133	4.12214	4.52491	4.06519	3.26784	5.86963	3.55898	5.37204	3.86049								134	0
	134					0.0401003	0.0133333	0.1	0.116667								134	3.21458	5.76967	3.5029	3.20888	4.67563	3.2897	5.97537	4.26946								135	0.337838
	135					0.0225564	0.0266667	0.0833333	0.133333								135	3.92954	3.37956	4.05505	3.47782	3.12125	3.43273	3.44404	3.23482								136	0.337838
	136					0.0150376	0.0433333	0.0566667	0.126667								136	3.45481	3.01762	5.23064	3.42027	3.05303	3.8015	4.25489	3.30478								137	0.337838
	137					0.037594	0.0466667	0.0733333	0.11								137	3.1688	5.6043	4.09076	3.59055	4.59304	3.40332	6.52337	4.4042								138	-0.337838
	138					0.0350877	0.0533333	0.0429293	0.0866667								138	3.08247	3.07296	3.09113	4.6744	5.3824	3.52201	3.13422	5.06664								139	0
	139							0.0252525	0.05								139	3.23796	4.64093	3.75063	3.13724	4.29009	3.48664	3.58387	3.19181								140	0
	140							0.030303	0.0633333								140	3.05692	3.1097	3.39336	3.29539	3.11052	3.035	5.68586	3.2336								141	0
	141							0.020202	0.0733333								141	3.23763	3.16256	3.17238	3.37995	3.86823	4.00863	10.3672	3.38232								142	0
	142							0.0227273	0.07								142	3.46526	3.56069	3.66907	3.31986	4.51037	3.79811	3.08725	3.36989								143	-0.337838
	143							0.020202	0.0533333								143	8.70984	5.0633	3.28656	3.51592	3.72656	3.11625	3.50942	3.51676								144	0
	144							0.0227273	0.0466667								144	4.36835	4.14003	4.96003	4.26522	5.35647	3.83645	3.18933	3.7771								145	1.01351
	145							0.0252525	0.0333333								145	3.84814	3.23344	3.12914	3.14888	4.92345	3.37956	14.469	3.28081								146	-0.337838
	146							0.0353535	0.0366667								146	5.54099	4.6731	3.04153	3.45868	4.67756	5.41074	3.06031	3.12388								147	-0.337838
	147							0.0353535	0.0366667								147	10.0415	3.54062	3.45223	3.78491	3.63988	3.108	3.13965	4.33511								148	0
	148							0.030303	0.03								148	4.03584	3.98091	3.99433	3.94792	4.00041	3.78379	3.28021	3.05538								149	-0.337838
	149							0.0252525	0.0333333								149	4.3389	3.79236	3.05321	3.39929	3.21539	3.28517	3.3852	4.53504								150	0
	150							0.0126263	0.0366667								150	3.4978	5.56131	3.75257	3.19759	7.84075	4.21764	4.7875	4.12875								151	0
	151							0.020202	0.0333333								151	3.58234	3.19411	3.24042	3.14764	3.70831	5.39842	3.42826	3.38932								152	0
	152							0.0277778	0.02								152	4.41225	3.02994	3.06421	3.09096	4.78081	3.27405	3.32293	3.35531								153	0
	153							0.0227273	0.03								153	3.63919	3.64446	4.66652	4.14378	3.21145	3.83683	5.13085	4.05523								154	0.675676
	154							0.0176768	0.04								154	3.47821	4.04498	3.24773	3.06454	3.14528	3.45787	3.59172	3.02902								155	0
	155							0.0176768	0.0333333								155	3.33554	5.05117	3.19949	3.80568	3.0742	4.74515	4.91356	5.02637								156	-0.337838
	156							0.0378788	0.05								156	3.33398	4.94056	3.40548	3.17017	3.14383	5.90765	5.75738	3.56								157	0
	157							0.0479798	0.0566667								157	3.32997	4.85655	3.55011	3.00413	3.49164	4.52035	3.06978	4.05551								158	0
	158							0.0454545	0.06								158	11.912	4.45729	3.24356	3.15097	3.09328	3.14911	4.43992	4.48712								159	-0.337838
	159							0.0530303	0.0566667								159	4.03508	5.23409	3.0593	3.11833	3.05494	3.4512	8.63069	3.17638								160	0
	160							0.0378788	0.04								160	3.20204	4.93387	3.21358	3.45164	5.69001	5.60402	3.9272	3.68								161	-0.337838
	161							0.0252525	0.03								161	3.67958	3.09598	3.55743	3.7224	4.03976	3.36999	3.26786	3.32372								162	0
	162							0.020202	0.05								162	3.00783	3.14224	3.54212	3.3295	3.6176	5.95549	3.4012	3.21508								163	0
	163							0.0176768	0.0433333								163	4.74589	3.46539	3.41104	3.04566	4.92193	3.27077	4.21894	3.22743								164	-0.337838
	164							0.020202	0.03								164	4.28319	3.19169	3.23072	3.89185	6.72665	5.47868	3.32272	3.46699								165	0
	165							0.0252525	0.05								165	3.28881	3.54774	3.06231	3.98383	6.72248	3.63216	3.05421	4.42444								166	0
	166							0.030303	0.0533333								166	6.8018	3.54738	4.19832	4.17379	5.73195	4.13131	3.99962	3.99089								167	0
	167							0.0277778	0.0533333								167	7.02476	3.52136	3.46184	3.64937	6.61479	3.76903	4.85377	3.09002								168	-0.337838
	168							0.0328283	0.03								168	6.85288	3.7964	3.28193	3.19448	5.02354	4.19488	3.06207	4.43478								169	0
	169							0.0277778	0.02								169	6.53475	3.13395	3.14059	3.0387	7.04041	3.60102	3.33924	3.43457								170	0
	170							0.030303	0.0266667								170	5.64711	3.52504	3.44373	3.35808	5.93555	3.91412	4.25808	4.21388								171	0
	171							0.0429293	0.05								171	4.1905	3.32175	3.18824	3.07022	5.87195	4.47748	3.20201	4.17826								172	0
	172							0.040404	0.0533333								172	7.58356	4.13731	3.69481	3.04343	6.21515	3.15557	3.81947	4.78032								173	0
	173							0.030303	0.0366667								173	3.46654	3.25321	3.03067	3.90229	7.78561	3.48959	3.40444	3.01563								174	0.337838
	174							0.0328283	0.04								174	3.03434	4.70419	3.39509	3.66258	6.68876	3.7702	4.68106	3.21586								175	0
	175							0.030303	0.04								175	3.64776	4.88452	3.06418	3.30302	5.69049	3.27715	5.23957	3.1069								176	0
	176							0.0328283	0.0233333								176	3.06125	3.12633	3.04867	3.36162	4.03632	3.2922	4.27168	3.32591								177	0
	177							0.040404	0.0233333								177	3.97006	3.24171	3.66747	3.59158	4.75543	5.61511	4.94237	3.70374								178	0
	178							0.030303	0.0266667								178	5.27855	7.423	4.12689	3.13285	3.37168	4.24135	3.22949	3.1486								179	0
	179							0.0126263	0.0366667								179	5.80593	3.57204	3.39482	3.69591	3.43869	7.23891	3.03263	3.9286								180	0
	180							0.010101	0.04								180	7.08893	4.48617	3.14626	3.1882	8.64522	4.24463	4.56819	4.58278								181	0.337838
	181							0.0353535	0.06								181	5.79874	3.6593	3.45654	3.37514	3.18122	7.74493	4.64244	3.95461								182	0.337838
	182							0.0353535	0.0566667								182	4.1888	4.70162	3.28251	3.47455	3.68009	9.59871	7.48602	3.52144								183	-1.01351
	183							0.0378788	0.0333333								183	5.82361	3.81634	3.15045	3.43323	3.13793	8.42032	3.94018	3.89928								184	1.68919
	184							0.030303	0.0366667								184	3.38983	3.17447	3.60877	5.66023	3.96065	4.75175	3.94799	3.13216								185	0.337838
	185							0.0277778	0.0466667								185	9.41719	3.04541	3.85777	3.08318	6.08141	4.17098	3.13335	4.42168								186	0
	186							0.0353535	0.0466667								186	3.69391	4.74564	3.12101	3.16064	8.17416	3.07974	3.13428	3.4313								187	0.337838
	187							0.0277778	0.04								187	5.48546	3.56075	4.33126	3.7947	5.56459	5.9085	3.00654	3.68339								188	0
	188							0.0227273	0.0333333								188	4.14827	6.11257	3.09658	3.70035	6.79664	3.62024	5.66666	3.15047								189	0
	189							0.0151515	0.04								189	3.05271	3.86171	3.16182	3.55319	6.81556	3.74683	4.10853	5.31571								190	0
	190							0.0328283	0.0533333								190	7.44508	3.71794	3.34571	3.63389	3.82341	3.08325	3.88726	3.31268								191	0.337838
	191							0.0277778	0.0466667								191	4.55216	4.71754	3.0981	3.12668	6.1399	3.23795	3.10746	3.38671								192	0
	192							0.0328283	0.04								192	4.19431	3.46766	3.13019	3.48886	4.97075	3.38324	4.1778	3.2691								193	0
	193							0.0277778	0.04								193	5.62403	3.76173	3.39471	3.5285	5.9252	3.2855	5.75537	3.13371								194	0
	194							0.0252525	0.0566667								194	7.67872	3.52346	3.32779	3.20531	3.61221	3.47128	4.09934	6.40524								195	0
	195							0.0277778	0.0566667								195	5.51133	3.09902	3.22287	3.28819	3.37561	6.61875	4.70395	5.69083								196	0
	196							0.030303	0.0466667								196	4.3378	6.2517	3.23659	3.73685	3.41843	4.16019	3.63364	6.40221								197	0
	197							0.0227273	0.0266667								197	3.37891	4.15695	3.59099	3.68307	3.64482	3.36831	3.03579	3.41108								198	0
	198							0.0176768	0.0266667								198	3.21157	7.10748	3.61498	3.32066	3.10338	3.04492	3.87561	4.31994								199	0
	199							0.020202	0.0233333								199	3.12854	5.00315	4.99277	3.42457	4.19801	3.87792	3.03294	3.57089								200	0
	200							0.0252525	0.03								200	3.54362	4.50646	3.05565	4.14148	3.78772	7.12178	4.69128	3.58104								201	0.337838
	201							0.0277778	0.03								201	3.16017	4.41646	4.3425	3.24746	3.48845	6.21578	3.37893	4.04419								202	0
	202							0.0227273	0.0266667								202	3.25088	4.62446	4.30483	3.78799	7.40905	7.65401	3.57668	3.45139								203	0.337838
	203							0.0328283	0.0266667								203	3.09831	3.7261	3.10007	3.42864	6.34607	5.41277	3.06697	4.21643								204	0.337838
	204							0.0353535	0.0433333								204	3.95556	3.42429	3.51146	3.9001	5.78009	6.14209	3.01622	7.34274								205	0
	205							0.0227273	0.0466667								205	3.59345	3.28431	3.24594	3.93487	3.34303	3.11661	3.58881	3.02652								206	0.337838
	206							0.010101	0.0233333								206	7.46969	3.12761	4.63062	3.6785	4.73196	3.30416	3.57342	3.73888								207	0.337838
	207							0.0126263	0.0266667								207	5.63208	3.0788	3.16841	4.25708	3.26412	4.0337	3.03401	3.62426								208	0
	208							0.0176768	0.0366667								208	4.32188	4.88527	3.00437	3.72434	3.21875	5.61098	7.59491	3.29279								209	0.675676
	209							0.0151515	0.0266667								209	3.24376	4.28075	4.29425	3.07661	3.47014	5.27172	3.87807	5.51897								210	0.675676
	210							0.0176768	0.0266667								210	3.73039	5.14126	3.47704	3.5339	3.473	5.92431	3.13297	3.31139								211	0.337838
	211							0.0277778	0.0433333								211	3.60579	4.51835	3.05307	3.01105	4.51493	4.68318	3.55749	4.08393								212	0.675676
	212							0.0328283	0.06								212	4.48695	4.38908	4.04445	3.14632	3.36981	3.60082	3.10932	7.32447								213	0.675676
	213							0.0328283	0.0333333								213	3.87451	4.86775	3.29449	3.18794	3.69523	4.31352	3.11957	4.54702								214	0.337838
	214							0.0353535	0.0633333								214	4.19233	7.52452	3.82925	3.0045	3.22499	5.25227	7.03173	4.02598								215	0.337838
	215							0.0277778	0.0366667								215	3.33613	4.99972	3.93176	3.81753	3.05207	5.77855	3.14018	5.02016								216	0.337838
	216							0.0328283	0.03								216	3.91098	5.48721	3.27857	4.02548	3.39999	3.45623	3.10918	3.53763								217	0.337838
	217							0.0429293	0.08								217	3.18547	5.6809	3.03224	3.09144	3.84808	3.07294	3.5925	3.12289								218	0
	218							0.0227273	0.0566667								218	4.77253	4.39007	4.14191	4.02206	3.02529	3.58238	3.40068	3.79647								219	0.675676
	219																219	6.02764	3.86571	3.57006	3.10391	3.99772	3.27618	3.18	3.44962								220	0.337838
																	220	4.4106	3.90958	3.02184	3.04105	3.80028	4.03676	8.33257	3.69129								221	0.337838
																	221	7.13713	3.99004	4.17522	3.1762	3.83026	3.03954	3.00375	3.60934								222	0.337838
																	222	6.51728	3.33501	5.53633	3.8778	6.19134	3.10676	3.27506	3.38869								223	0.337838
																	223	3.65025	5.35371	4.16384	3.93869	3.77926	4.21268	3.23303	3.23421								224	0.337838
																	224	3.17212	7.86159	3.1638	4.15092	3.84992	4.89135	3.03373	5.69299								225	0.675676
																	225	3.76719	3.87145	3.10954	3.15551	3.07002	3.20109	7.41871	3.48313								226	1.68919
																	226	8.43795	4.24871	3.86687	3.10556	3.09075	3.20329	4.09853	5.12282								227	2.02703
																	227	7.23817	3.02563	3.10638	4.08053	3.09898	3.67729	3.53856	3.32509								228	0.337838
																	228	6.32407	3.2859	3.29959	3.00789	5.33696	3.09362	3.98761	4.32841								229	0
																	229	5.0651	3.76075	3.35911	3.15488	5.9056	3.68288	4.22598	3.10562								230	0.337838
																	230	5.08925	4.32772	3.10945	3.00363	7.39625	4.37498	3.95767	3.18181								231	-0.337838
																	231	5.56814	3.03893	3.21187	3.98207	3.86971	3.69545	3.27535	3.25063								232	0
																	232	5.70417	4.30538	3.95081	3.09535	6.66569	3.24855	3.17378	4.47471								233	-0.337838
																	233	4.36947	3.64192	3.23447	5.27569	9.21865	3.66864	3.06007	6.26425								234	0
																	234	3.87239	3.49195	3.37085	3.21126	6.36509	3.85297	3.00477	6.10882								235	0.337838
																	235	3.00158	4.88888	3.44562	4.13713	5.80796	3.33931	3.86004	4.10603								236	-0.337838
																	236	4.7423	4.37895	3.01274	3.04912	5.96923	3.05692	3.45653	3.4485								237	0
																	237	3.76491	3.71985	3.92563	3.4729	4.98889	3.73581	4.11995	5.14378								238	0
																	238	5.19697	3.47374	5.27272	4.39746	6.00377	3.23958	4.6776	3.06417								239	-0.337838
																	239	3.4496	3.42458	3.57463	5.06343	9.27476	3.98085	4.49565	3.47046								240	0
																	240	3.67936	6.80903	3.94303	3.62292	6.45077	3.23934	4.25832	3.3054								241	0
																	241	5.99204	4.84853	3.14445	3.22458	6.3737	3.73356	3.7316	3.11856								242	-0.337838
																	242	3.91738	3.43207	3.5399	4.50181	4.67451	3.28057	3.84323	3.15694								243	0
																	243	4.57336	3.48197	3.11265	3.44893	3.27397	3.34448	3.61134	3.17824								244	0
																	244	6.4045	3.30466	3.00923	3.28224	4.18271	4.48671	4.15331	3.18789								245	0
																	245	3.84354	3.69077	3.38194	3.02885	4.17255	3.24796	3.09104	3.85664								246	0
																	246	3.64035	3.32781	3.84883	3.54003	3.64583	5.9096	3.46232	4.32531								247	0
																	247	9.87466	4.37946	4.69981	4.27937	3.68358	6.27326	3.49006	3.00162								248	0
																	248	3.35145	3.59097	4.24013	3.60243	3.38791	5.06337	3.10687	3.26225								249	-0.675676
																	249	4.36932	4.26354	3.2351	3.3347	3.66241	4.51999	3.00199	3.26935								250	0
																	250	4.17132	3.85301	3.33036	5.00141	3.49356	3.06071	8.25424	3.6456								251	0
																	251	5.2417	3.41212	3.17715	3.0716	3.29986	3.16688	3.25738	3.91227								252	0
																	252	6.88442	4.53044	3.02511	3.62583	4.43452	4.14205	3.6696	3.07675								253	0
																	253	5.50444	3.73712	3.16685	3.12266	5.63844	5.17749	3.00978	3.20161								254	0
																	254	5.95863	3.58483	3.46025	4.17268	8.64066	6.56005	3.13897	3.30482								255	0
																	255	6.41342	3.49104	3.46093	5.20344	6.56451	6.39873	6.05619	3.47357								256	0
																	256	7.47564	4.71744	3.06419	3.10179	3.07951	4.51785	13.6974	3.35559								257	0
																	257	4.06142	4.25318	3.39449	3.02234	6.97166	3.15576	3.15804	3.67148								258	0
																	258	6.14551	3.34955	3.09637	3.4254	4.84561	5.18048	4.83843	3.21668								259	0
																	259	3.65307	3.77983	4.34161	3.02696	5.21199	4.32578	3.336	4.03446								260	0
																	260	3.07044	3.11269	4.27457	3.42637	3.65012	6.02209	3.58712	3.16503								261	0
																	261	3.59603	4.65392	3.34771	3.65477	3.58582	4.71909	4.28691	3.0954								262	1.35135
																	262	6.43538	4.05187	3.29007	3.68392	3.71989	3.65831	3.10564	3.2373								263	1.35135
																	263	6.44438	5.83917	3.88772	3.05064	3.71065	3.37272	8.81262	3.13493								264	0
																	264	6.5996	4.66413	3.34515	3.51143	3.40322	3.344	3.28647	3.4881								265	0
																	265	7.16104	4.61173	3.49366	3.13724	3.38421	3.97869	3.37837	3.1044								266	0.675676
																	266	5.53566	8.9959	3.09759	3.31233	3.30434	3.08872	3.50468	3.56674								267	-1.01351
																	267	4.60539	6.62304	3.4836	3.36104	3.24026	5.42458	3.63301	3.14892								268	1.01351
																	268	3.9668	5.17204	4.30114	4.10065	3.63562	3.71837	3.31588	5.20901								269	0
																	269	7.24025	5.33005	3.0526	3.01375	3.39146	3.67558	4.06482	3.09189								270	0.337838
																	270	3.832	5.05953	4.30288	3.81414	3.06365	3.53588	3.66219	3.21354								271	0.337838
																	271	3.20392	6.76904	3.47128	3.72978	4.02792	4.61935	3.49033	3.00045								272	0.675676
																	272	3.39452	4.21512	3.15735	3.00032	3.13396	3.77496	3.07494	5.70659								273	0.675676
																	273	3.94729	3.38564	3.89697	3.12844	3.18381	3.06219	18.182	3.07241								274	0.675676
																	274	4.23192	3.87918	3.57966	3.3605	4.3765	3.26151	3.07108	4.34425								275	0.337838
																	275	5.69908	4.46464	3.12867	3.44434	4.42284	3.13603	3.29218	5.04152								276	1.01351
																	276	4.87103	6.06734	3.29466	4.21593	4.36014	3.22659	3.14838	3.81068								277	-0.675676
																	277	3.57734	3.65584	3.60687	3.44916	4.49828	3.02787	3.51015	5.09143								278	1.01351
																	278	3.01039	3.48132	3.30262	3.59795	4.02907	3.27036	3.2028	4.66286								279	1.01351
																	279	5.26424	3.46334	3.34775	3.464	3.13998	3.02516	5.72812	4.3821								280	0.337838
																	280	4.23045	3.96663	3.57834	3.31541	3.36512	3.35172	3.01951	3.97549								281	0.337838
																	281	3.58023	3.4393	3.11508	3.32306	4.70578	3.61425	3.92391	3.06203								282	-0.337838
																	282	3.62316	3.05112	3.09746	3.52645	3.53817	4.69487	4.02397	4.44008								283	1.01351
																	283	3.41213	3.43915	3.35111	3.75869	3.18102	3.5248	3.71001	3.03556								284	-0.337838
																	284	3.95749	4.00012	3.74516	5.17644	3.8661	3.30698	3.40582	3.41524								285	-0.337838
																	285	4.24922	4.33377	3.37571	3.40993	4.13467	4.04356	3.19679	3.17126								286	-0.337838
																	286	3.37995	3.9866	3.73213	3.24493	4.59303	4.04145	3.43915	3.41432								287	-1.01351
																	287	3.20304	4.53913	9.71934	3.89294	4.0819	4.59022	3.03151	3.00697								288	1.01351
																	288	3.55612	4.29798	3.31904	3.7077	3.40113	3.34215	3.00667	4.11175								289	1.01351
																	289	4.97166	3.81822	3.94465	4.21946	4.30415	5.36894	3.36036	3.06716								290	1.01351
																	290	3.98659	4.53997	5.12685	4.57632	3.50125	4.26826	3.01884	3.02329								291	0.337838
																	291	3.28037	3.05629	3.69991	3.17794	3.76972	4.44238	3.36913	3.21414								292	-0.337838
																	292	8.03473	3.55362	3.30787	4.04215	3.24388	6.61932	3.44405	3.60523								293	-1.01351
																	293	5.12117	4.1105	3.71858	3.07261	3.45965	5.11158	3.43464	3.09698								294	-0.675676
																	294	6.61983	3.17727	4.0138	4.71155	4.86466	7.60518	3.1135	3.48871								295	0
																	295	4.72073	3.13384	3.9015	3.13616	3.19099	4.66217	3.15376	3.16278								296	0.675676
																	296	7.44216	3.7235	3.25966	3.15352	3.62015	3.86271	4.15757	3.9691								297	1.35135
																	297	3.38172	3.12509	3.77139	3.53672	4.837	3.7311	3.77068	3.31516								298	1.01351
																	298	5.06405	4.60118	3.24847	3.02206	4.10354	4.05304	6.72075	5.3208								299	-0.337838
																	299	5.87216	4.87389	3.25715	3.29581	7.4435	8.63876	4.913	3.36943								300	0
																	300	3.39637	4.69232	3.83373	3.14257	4.00483	5.47337	3.98938	3.06422								301	1.01351
																	301	3.43091	6.31642	3.18985	3.27427	4.74323	5.8485	3.58867	4.11853								302	-0.337838
																	302	3.64281	5.2856	3.32146	4.10954	7.31539	4.72759	5.93031	3.90945								303	-0.675676
																	303	3.66406	4.95463	3.05276	3.67228	4.90159	3.17886	6.20082	5.53123								304	-0.675676
																	304	4.09934	5.60791	3.23143	3.2757	4.7481	3.18459	3.03313	3.12141								305	1.35135
																	305	5.96965	3.76014	3.02014	3.51018	6.65673	3.16828	6.30039	3.96371								306	-0.675676
																	306	3.31545	3.15401	3.28981	3.01735	4.21929	3.16483	5.40328	3.50771								307	0.675676
																	307	3.21	3.65006	4.08539	3.2039	3.55681	3.03038	6.39431	3.14973								308	0.337838
																	308	3.14397	3.31677	3.9027	5.3531	3.29054	3.0203	4.6137	3.30914								309	0.337838
																	309	3.04481	3.08023	3.2805	4.68589	4.061	4.18886	3.82551	3.47628								310	-1.35135
																	310	3.99827	4.34867	3.27914	3.99962	3.96144	3.09319	3.05429	3.20431								311	0
																	311	6.14117	4.37743	3.37015	3.23853	4.12	5.39356	3.5784	3.21287								312	0.675676
																	312	7.08253	4.51853	3.37934	3.09696	3.7673	4.33992	12.2843	3.14027								313	-0.675676
																	313	8.75922	3.92528	3.70998	4.20314	3.96252	3.74906	3.06957	5.76119								314	-0.675676
																	314	3.68906	5.92927	3.14987	3.09421	3.43333	3.37313	6.02806	3.42592								315	0.675676
																	315	3.11944	3.52884	3.15866	3.85756	3.5665	3.66731	4.32996	4.35335								316	0
																	316	3.465	4.74806	3.58859	3.52663	4.12662	4.50158	4.4476	3.64165								317	-0.337838
																	317	6.34029	5.48944	3.17694	4.24423	3.05716	7.84341	6.44204	4.6094								318	0.337838
																	318	5.55179	3.82639	3.09652	4.03924	4.96398	4.60364	5.23702	3.32732								319	0
																	319	5.65474	7.57411	10.962	3.87848	8.92575	8.33675	6.03576	3.32414								320	0
																	320	7.77758	7.99485	3.93124	3.00637	4.54105	6.56305	4.18423	3.08649								321	0.337838
																	321	3.76806	3.5708	3.15004	3.41058	3.9429	6.62596	6.69824	6.16791								322	1.01351
																	322	3.39025	4.33703	4.51794	3.02475	3.01262	4.54555	4.86256	3.04267								323	0
																	323	3.02096	3.15235	3.07208	3.5141	3.12933	3.73817	6.89825	3.73253								324	-0.675676
																	324	3.28712	3.42564	3.25282	3.08093	3.5081	3.13268	5.62142	5.1116								325	0.675676
																	325	3.5827	3.8943	3.58113	3.77834	3.00981	3.505	6.34143	3.64433								326	0
																	326	3.48464	4.45582	3.67866	3.16324	3.41398	3.08056	5.00464	3.23377								327	1.01351
																	327	4.557	4.81854	3.05134	3.35576	3.11511	3.63727	6.28865	3.69519								328	-0.337838
																	328	3.23107	3.73136	3.22696	3.10199	4.69478	4.01503	5.84267	3.11419								329	-0.337838
																	329	5.55588	5.93296	4.08377	3.09485	5.2355	3.23788	3.50756	4.05445								330	0.337838
																	330	5.40429	4.31687	3.18167	4.228	3.59527	3.98409	4.65264	3.75359								331	-0.337838
																	331	3.40379	3.53289	4.68602	4.05601	3.7987	6.09147	3.57978	3.06548								332	1.01351
																	332	3.06129	3.09434	3.30515	3.57628	3.88288	4.22246	3.74356	3.50995								333	-0.337838
																	333	7.10564	6.03105	3.40295	3.19257	6.99854	6.69764	4.36657	3.04686								334	0.675676
																	334	3.37463	6.64596	3.0451	3.71752	3.00965	5.28578	3.02362	3.08989								335	0.337838
																	335	4.79577	3.63001	3.01065	3.66382	3.0528	5.55476	3.16343	4.44738								336	0.337838
																	336	4.75186	3.5668	3.55049	5.04169	3.99797	4.6667	3.05566	3.37133								337	1.01351
																	337	3.2041	3.78252	3.75903	3.52242	3.62372	5.92778	3.94751	4.67908								338	-0.337838
																	338	3.23179	3.37421	3.45664	4.20052	4.56447	5.09489	3.97389	3.4345								339	0.675676
																	339	3.59664	3.02808	3.13262	3.23252	3.28065	4.71013	3.30872	7.32203								340	0
																	340	3.29666	3.56336	3.69932	3.03459	3.26918	4.50818	3.36828	4.96367								341	1.01351
																	341	3.03658	3.58519	3.1568	3.60495	3.92604	3.23139	4.02791	3.92924								342	0.675676
																	342	4.42534	4.52417	3.51481	4.50094	5.57079	3.18024	5.6568	6.54151								343	-0.337838
																	343	3.8749	3.10283	3.34097	3.00101	3.02876	3.73418	7.52118	3.26084								344	0.337838
																	344	3.41506	3.31742	4.94735	4.16095	3.61803	4.29411	4.9931	3.94414								345	0
																	345	4.04978	4.25267	3.46076	4.73588	3.25153	3.14204	3.12277	3.32084								346	0.337838
																	346	3.07916	3.97398	3.06816	4.26756	3.77558	4.81418	7.40836	3.56099								347	1.35135
																	347	5.32541	3.45387	3.2851	3.52619	4.41918	3.40713	5.70355	3.35172								348	-1.68919
																	348	5.1877	3.31433	3.60627	3.73389	4.27901	3.64856	4.01766	3.40645								349	0.337838
																	349	4.04279	4.64994	3.57365	3.71958	6.62923	4.39342	4.02564	3.21998								350	-0.337838
																	350	3.03869	3.39367	3.66732	3.60086	4.54644	3.56932	4.50284	4.05842								351	-0.675676
																	351	3.09037	4.44835	3.81638	4.05996	7.43089	3.65885	3.49126	4.10993								352	0
																	352	3.20466	4.19275	3.71991	3.85177	4.9057	4.46038	16.7353	3.3804								353	-0.337838
																	353	3.29157	3.83086	3.4828	3.14288	5.17455	5.07481	3.0919	3.34873								354	0
																	354	3.71603	4.29634	4.42036	3.61163	4.6436	5.07491	4.32623	3.18419								355	0.337838
																	355	4.17855	5.98185	3.46795	3.14523	3.32534	4.53782	3.23997	4.26402								356	0
																	356	3.54815	4.10345	3.16392	3.3332	3.82372	3.46107	3.20775	3.00593								357	0
																	357	7.15652	3.25564	4.04892	3.50706	3.73805	4.84395	3.04344	3.16056								358	1.01351
																	358	3.18839	3.87424	3.25543	3.22135	4.62205	4.24326	6.72514	3.21711								359	0
																	359	3.48308	5.5599	5.04448	3.05909	3.1519	3.12461	5.41502	3.81416								360	0
																	360	9.0544	5.14191	3.05715	3.07979	5.5562	4.83347	3.30114	3.09895								361	-0.337838
																	361	4.86114	6.03712	3.32162	3.1629	4.26266	6.23848	3.19224	3.24853								362	-0.675676
																	362	5.64969	4.98548	3.18967	4.58255	3.15572	5.82677	3.95486	4.0794								363	0.675676
																	363	3.49505	5.05151	4.04737	3.56012	4.49526	3.14893	3.71358	3.38584								364	0
																	364	3.45981	3.92326	3.10395	3.15972	8.49451	5.09614	3.3529	3.75222								365	0
																	365	3.16798	5.34234	3.59669	3.62525	3.1427	5.0847	3.07223	3.95161								366	0
																	366	3.00901	6.975	3.0392	3.02137	3.17575	3.94732	3.35879	4.63232								367	0.337838
																	367	3.0194	4.67711	3.89298	3.55941	5.44435	3.21095	7.97591	3.50438								368	-0.337838
																	368	3.89931	6.17027	3.11324	3.00476	3.19895	4.6012	4.41467	3.24535								369	1.01351
																	369	4.0042	5.46073	3.48433	3.54856	3.6557	4.3748	3.10798	3.15497								370	0.337838
																	370	3.88828	3.3092	3.04601	3.26406	3.79862	3.06586	3.09149	3.73376								371	0.337838
																	371	5.4027	3.28682	3.00564	3.04864	3.38327	3.50272	4.34196	3.38627								372	-0.337838
																	372	4.87401	3.31144	3.00925	5.06282	3.5869	3.49336	3.58314	3.39518								373	0
																	373	5.82547	5.6709	3.59959	3.69222	3.01084	3.34276	3.45354	3.19081								374	-0.675676
																	374	5.47727	4.87256	3.08764	3.73538	4.24948	3.39749	3.36165	3.61815								375	-0.675676
																	375	3.39156	3.92705	3.13534	4.55153	3.7779	7.3588	3.06019	3.02464								376	-1.01351
																	376	6.5149	4.4332	3.30144	4.69091	4.18232	3.39708	3.19381	3.52273								377	0.675676
																	377	11.8755	3.12212	4.29892	3.13664	3.49599	3.09366	3.06946	3.63062								378	0.675676
																	378	3.64154	5.17589	3.1708	3.46433	4.7587	3.67984	3.84107	4.47325								379	0.337838
																	379	3.73146	4.15203	3.01813	3.03098	4.69523	3.05164	3.21719	5.10785								380	1.01351
																	380	3.74534	3.84804	4.13638	5.44916	3.06866	3.80294	3.83918	3.40498								381	0.675676
																	381	3.4849	3.12618	3.10906	3.87037	3.51391	4.54866	3.46454	6.17735								382	1.01351
																	382	4.04573	6.73628	3.31979	3.05932	4.48502	3.88053	3.71079	5.57766								383	0.675676
																	383	3.27011	4.01711	3.0722	5.29168	3.16711	4.8051	3.01691	3.41924								384	1.01351
																	384	7.71747	3.95255	3.61064	3.75647	3.36378	3.1808	4.1911	3.0689								385	1.01351
																	385	10.1865	5.39256	3.24085	3.30696	3.65425	4.80769	3.0003	3.14938								386	0.675676
																	386	6.2078	5.97596	3.01679	3.68163	3.86317	3.69382	3.22965	3.65981								387	0.675676
																	387	3.63926	6.90298	3.43606	4.70316	3.1434	3.08656	4.44781	4.48495								388	0.675676
																	388	7.51665	6.92593	3.72871	4.18241	6.34197	3.64495	3.13423	3.31231								389	0.337838
																	389	7.99238	3.13956	3.14641	4.49541	4.7442	4.94053	3.19182	3.6257								390	0.675676
																	390	3.09405	4.78877	3.73406	3.51327	3.09486	3.93073	3.25534	3.42203								391	0.337838
																	391	4.24715	3.58696	3.28945	3.55698	3.40916	3.0337	4.19573	3.19396								392	-0.675676
																	392	4.85111	5.15736	3.67772	3.48624	3.72655	5.39048	3.02895	5.50133								393	-0.675676
																	393	3.70581	5.37814	3.86615	3.3714	3.56627	3.26227	3.9662	4.19197								394	0.337838
																	394	4.25253	6.96362	3.26225	3.41325	3.02181	5.13549	9.10087	3.50755								395	0.337838
																	395	3.30276	4.81633	3.44777	3.1754	3.72854	4.97005	4.1036	3.30156								396	0.337838
																	396	4.32119	4.2012	3.96196	3.0358	3.50623	6.58272	3.28276	3.03763								397	1.01351
																	397	4.29955	4.25037	4.73944	3.59636	3.09222	3.20201	3.12722	4.08288								398	1.35135
																	398	8.6242	4.69612	3.38433	3.12416	5.45462	3.02157	3.68045	3.64205								399	0.337838
																	399	3.79945	3.95362	3.52664	4.25642	3.16848	8.24307	3.86904	3.55867								400	1.01351
																	400	7.42343	7.02497	4.2505	3.25506	3.03896	3.11031	3.26964	4.44656								401	-0.675676
																	401	3.06873	6.60544	3.45701	5.82425	3.70758	3.08335	3.78778	3.47618								402	0.675676
																	402	7.22113	6.36597	3.41453	3.24544	3.118	3.40291	3.58433	3.68548								403	0.675676
																	403	3.70837	5.61142	3.27003	3.1658	3.54415	3.35605	5.14599	4.2667								404	0.337838
																	404	5.13397	7.77833	4.2038	3.22997	3.09655	4.72276	3.09001	3.29455								405	0.337838
																	405	3.32311	4.65765	5.63903	3.44715	3.73576	5.63639	4.39235	6.73898								406	0
																	406	4.4887	8.28824	4.15902	3.19931	3.04406	4.41439	3.3978	7.13942								407	0
																	407	4.32832	3.82561	3.44027	3.22237	3.19371	4.14332	3.24691	3.02142								408	1.35135
																	408	4.23073	3.23007	3.33421	3.60476	3.15441	5.5463	3.22064	3.08199								409	0.337838
																	409	4.07474	6.86051	3.0364	3.19143	3.092	3.83166	4.29917	4.57631								410	1.01351
																	410	3.98995	4.55525	4.6956	3.687	3.18509	3.02118	3.05735	3.25745								411	0.337838
																	411	3.30659	5.63579	3.10817	3.74554	6.94319	3.27248	5.46528	3.55554								412	-0.337838
																	412	3.04995	8.59499	3.87527	3.30286	3.53216	4.01834	3.635	3.46454								413	-0.337838
																	413	3.18041	5.27239	3.26015	6.57515	3.8912	3.67782	3.0351	3.39646								414	0.337838
																	414	3.31371	4.16078	3.04175	4.62393	3.61368	3.88475	3.13208	3.90442								415	-1.01351
																	415	3.45809	3.01743	3.15472	3.60767	3.30813	3.97944	4.55069	4.22039								416	-0.675676
																	416	4.96649	4.65823	3.03295	3.59784	3.43404	4.05116	3.08985	3.89102								417	-0.337838
																	417	4.15994	3.2748	3.26133	3.36568	4.31947	3.33584	3.25995	3.15318								418	-1.68919
																	418	3.30214	4.19451	3.80624	3.54425	4.87748	3.45994	3.39365	3.38737								419	0
																	419	4.23819	5.00064	3.17608	3.16746	4.05658	3.00944	3.34276	3.42454								420	-0.337838
																	420	4.35262	7.6104	3.03824	3.99699	3.41474	3.18434	3.34138	3.22292								421	0
																	421	4.19827	3.2723	3.44531	3.36035	3.39875	3.08556	3.3559	3.304								422	-1.35135
																	422	5.06159	5.01465	3.16406	3.29846	4.02575	6.18115	3.1492	3.28964								423	-1.01351
																	423	3.15731	6.45206	3.83975	3.38256	3.55929	3.82314	3.50398	3.17714								424	0.675676
																	424	3.29828	5.67651	3.57075	3.34832	3.2662	3.62934	3.154	3.10712								425	0.337838
																	425	3.34679	5.19882	3.23682	3.68847	7.78919	4.89829	3.56303	4.48105								426	0.675676
																	426	4.40183	4.24844	3.59177	3.3965	3.57586	3.01308	3.11403	4.3159								427	1.35135
																	427	3.00059	3.02957	3.22604	3.7292	3.39197	3.4804	3.17342	3.07079								428	0.675676
																	428	3.67863	4.05526	3.72145	3.5327	3.50435	3.54773	5.0195	3.03409								429	0
																	429	3.94423	3.51749	3.32068	4.92139	3.01131	4.69263	3.22161	3.53638								430	-0.675676
																	430	4.6886	4.01523	3.57228	3.66293	3.47191	3.22981	3.12326	4.42966								431	0
																	431	4.37507	3.20177	4.14717	4.24623	3.76424	3.32379	3.23117	3.02538								432	-1.01351
																	432	4.56093	3.5006	3.50657	3.14891	3.11012	3.54021	3.31641	3.27297								433	-0.337838
																	433	3.31142	3.00898	3.64407	3.22409	3.00487	3.68919	3.29163	3.26031								434	1.01351
																	434	3.19802	3.4536	3.04332	4.43202	3.18512	3.2791	3.03664	3.00112								435	-0.675676
																	435	6.27663	3.0159	4.07622	3.48918	3.60993	4.13572	3.1755	5.00583								436	-0.337838
																	436	5.59805	3.18628	3.7831	6.66275	3.64211	4.42134	3.4495	3.53872								437	0
																	437	6.04932	3.25139	3.01038	3.35672	5.9836	3.00275	3.06456	3.13157								438	-0.675676
																	438	5.37847	5.28166	3.838	3.31398	3.37378	7.15144	3.36027	4.5978								439	-1.01351
																	439	4.68313	3.1105	3.34582	3.2114	3.27007	4.71176	3.04578	4.54197								440	-1.01351
																	440	6.97279	3.39244	3.63868	3.37545	3.094	5.14574	3.44465	3.47114								441	-0.337838
																	441	7.75219	3.82215	3.10495	3.38319	3.30778	4.33207	3.88549	4.95549								442	-0.337838
																	442	4.1994	3.64176	3.91353	3.57562	3.05807	8.03632	3.01101	3.24523								443	-0.675676
																	443	3.91202	3.41057	3.89116	3.09242	3.52896	3.58578	3.33636	3.53234								444	0.675676
																	444	3.66201	3.4796	3.03466	3.10621	3.08474	3.24871	3.03006	4.09183								445	-0.675676
																	445	3.22879	4.08306	3.40762	3.42757	3.76232	3.23643	3.08316	3.01376								446	-1.01351
																	446	3.53126	3.88678	3.24354	3.12238	3.33086	3.92238	3.58119	3.1192								447	0
																	447	3.35908	4.8971	3.11969	3.62776	3.17756	3.08835	3.90464	4.05128								448	-0.675676
																	448	4.71453	4.16795	3.32174	3.62862	3.84851	3.26322	3.28857	4.77866								449	1.01351
																	449	3.33157	8.80487	3.51634	3.31773	3.1007	3.29115	3.33634	3.66083								450	0.337838
																	450	3.90385	5.45302	4.68516	3.50565	3.2453	4.09491	3.3379	3.9336								451	-0.337838
																	451	4.16774	4.7468	3.86338	3.74847	3.25466	3.45698	5.51151	3.26376								452	-0.337838
																	452	3.58584	5.94301	5.87926	3.49554	4.8581	3.45645	5.33441	3.28793								453	-2.02703
																	453	3.10022	4.75931	3.52278	3.75235	3.7151	3.97147	3.20724	4.42907								454	-1.35135
																	454	3.40644	3.17833	5.78802	4.67328	4.57684	4.37689	3.61377	4.17911								455	0
																	455	3.48068	4.20035	5.90623	3.84111	5.01235	4.32953	3.00243	3.47717								456	0
																	456	4.72092	3.58397	5.08084	3.82054	4.27677	3.25244	6.46778	3.51291								457	0.337838
																	457	3.20481	3.74149	3.09703	3.29115	4.75594	3.82694	6.61389	5.51162								458	0.337838
																	458	3.1437	4.62512	3.95855	3.35809	3.66681	4.74758	3.31496	3.83418								459	-0.337838
																	459	3.6112	3.91666	3.48194	3.70057	4.60193	4.39259	3.30671	3.37491								460	0.337838
																	460	4.20388	3.0738	3.07536	3.7953	3.58399	3.89325	4.76582	3.48387								461	1.01351
																	461	4.34359	3.87229	3.00633	4.39266	4.91662	3.20203	5.96588	3.1171								462	0
																	462	3.00701	3.13351	3.8836	3.03391	3.20276	3.5218	3.10137	3.55147								463	0.337838
																	463	3.05449	3.07639	3.90497	3.40699	3.22973	5.92013	7.61292	4.21712								464	-0.337838
																	464	3.74231	4.42835	4.25258	3.4411	3.55013	4.98979	4.05336	4.21091								465	-1.01351
																	465	4.17829	4.47585	3.85672	4.39004	4.26673	3.57918	4.75128	3.43151								466	1.01351
																	466	3.42398	3.08595	3.24011	3.3234	5.54006	3.23294	5.47028	3.31507								467	-1.35135
																	467	3.08456	3.91014	3.54839	3.0305	3.00853	3.1607	5.30508	4.0926								468	0.337838
																	468	3.1937	3.21213	3.2439	4.28184	3.0781	3.19069	3.54955	3.16762								469	1.01351
																	469	3.64772	3.20543	3.31174	3.81139	17.6349	4.25575	3.65776	3.59609								470	0.675676
																	470	4.40905	3.02333	3.88015	3.04583	5.05505	3.11522	3.33111	3.03036								471	0
																	471	6.62582	4.11741	4.20141	3.63268	3.03072	3.30255	4.18804	3.92302								472	-1.68919
																	472	3.20258	4.56857	3.17303	3.12074	3.91185	3.58485	3.54619	4.82871								473	-0.337838
																	473	3.20573	4.97546	3.58341	3.20523	3.49283	3.31283	3.5291	3.59059								474	1.01351
																	474	3.53801	3.00019	4.51897	4.21114	3.09267	3.82591	3.8969	3.27618								475	0.675676
																	475	3.45618	8.61995	3.12859	4.55061	4.28983	3.16327	5.59948	3.14039								476	-0.675676
																	476	3.2752	3.24959	3.93092	3.15195	3.45517	3.79183	3.82445	3.04575								477	0.337838
																	477	3.38947	3.13776	3.35676	3.39053	3.47515	3.17294	3.21065	3.29031								478	0
																	478	4.82716	7.94641	3.17002	3.61525	3.07432	3.61127	3.75719	3.76738								479	1.01351
																	479	5.86215	7.97232	3.45027	3.63377	3.54832	3.6076	3.32282	3.17978								480	-0.675676
																	480	6.20565	4.84704	5.40667	5.59678	4.06197	4.05289	3.0501	4.51134								481	-1.68919
																	481	5.83375	6.77848	4.21454	3.05405	3.16516	3.12242	3.17471	3.36662								482	-1.01351
																	482	5.74248	3.63375	3.29224	3.20917	3.03271	4.1081	3.33638	3.2895								483	-0.675676
																	483	5.21887	5.40018	3.03527	3.38254	3.14063	3.14336	4.45383	4.5078								484	0.675676
																	484	3.57718	3.80867	5.44672	4.09125	3.35561	4.1439	3.24425	3.19022								485	-0.337838
																	485	5.02186	3.30369	3.31608	3.06699	3.316	4.71576	3.34755	3.94296								486	0.337838
																	486	3.62395	3.93815	4.36416	3.18667	3.00372	3.00262	3.81958	4.01811								487	0.675676
																	487	3.43409	3.46644	3.74489	3.34792	3.31794	5.03463	3.57163	3.0718								488	1.01351
																	488	3.31969	3.42847	4.11145	4.65629	3.52046	3.6564	3.54095	3.36508								489	-1.68919
																	489	3.52873	9.02656	3.40935	3.85148	3.68324	4.59542	3.09491	7.19702								490	-0.675676
																	490	4.24917	4.83386	3.53482	3.87463	3.99841	3.93455	3.98051	3.00521								491	0
																	491	3.03302	4.20776	4.27459	3.91528	4.45056	3.1874	3.55123	3.19337								492	-0.675676
																	492	3.34926	8.19313	3.29473	3.19218	3.08182	3.15475	3.53449	3.31388								493	0
																	493	3.14912	4.87619	4.60546	3.52743	3.08582	3.22366	3.80315	3.33067								494	-0.675676
																	494	3.47894	3.79488	3.20633	5.07081	4.56817	3.14229	3.33823	3.35701								495	0
																	495	3.1469	4.71557	3.07461	3.70704	3.30244	3.0797	3.86521	3.08581								496	-0.337838
																	496	5.61344	3.37232	3.95359	3.14015	3.5026	3.51556	3.47752	3.17773								497	0
																	497	6.45801	4.71369	3.05565	3.16336	4.4704	3.33846	3.46721	3.85578								498	1.01351
																	498	4.334	3.74691	3.26825	4.52594	3.14367	3.24319	3.21625	3.95763								499	0
																	499	8.3415	4.87893	4.62571	3.77636	3.2658	3.3132	3.07254	4.08458								500	0.337838
																	500	4.72733	4.68716	7.24386	6.65591	3.07443	3.41946	3.31034	4.41949								501	-0.337838
																	501	4.33989	4.03878	3.07514	4.48103	3.80688	4.81246	3.99598	3.46662								502	0.675676
																	502	7.13865	4.76756	3.32379	6.13691	3.06172	3.69884	3.12465	3.17345								503	0.675676
																	503	3.41209	4.77545	3.97988	9.76812	3.35755	3.57277	4.11785	3.40685								504	0.337838
																	504	4.2772	7.72678	4.0412	7.1394	3.18656	3.80382	3.19364	3.57688								505	0
																	505	3.79707	5.2784	3.38421	4.48641	3.18472	3.76738	3.652	3.80489								506	0.337838
																	506	3.27814	5.32539	3.27593	3.59854	3.84439	5.64381	3.21101	4.09792								507	0.675676
																	507	4.94815	3.67145	4.08473	4.09593	3.92054	3.42334	3.20789	3.07385								508	-0.337838
																	508	3.11377	8.25962	3.80639	3.04862	3.39489	3.99451	3.29896	4.92351								509	0
																	509	3.3919	5.41343	4.25166	3.83661	4.16472	3.09933	4.03695	4.27057								510	0
																	510	3.2395	4.95217	3.19089	6.31194	3.03152	5.83622	3.49004	4.76593								511	-0.675676
																	511	3.51843	5.24855	4.91951	3.11377	3.65639	4.09121	3.17312	3.05515								512	0
																	512	3.18191	3.57758	5.16212	3.68041	7.58803	3.00263	3.71924	3.40083								513	1.35135
																	513	3.19867	3.83921	4.57036	3.01051	4.01432	4.36158	3.00013	3.44901								514	0.337838
																	514	3.20899	3.2402	3.62142	4.43232	3.15606	3.03015	3.0032	3.01133								515	-0.675676
																	515	5.37134	3.96384	5.58091	5.59338	3.08953	3.3093	3.08691	5.09004								516	-1.01351
																	516	3.62996	3.07333	3.35509	4.08424	3.53465	3.26766	3.68764	3.04073								517	-1.01351
																	517	4.446	3.15518	3.75728	3.01604	3.28457	3.41005	3.10205	4.47975								518	-0.675676
																	518	3.24323	3.13742	3.12355	7.65348	3.73242	4.01907	3.67543	4.01128								519	1.01351
																	519	3.11637	3.83669	3.00118	8.24053	4.19963	3.19085	3.83979	3.28138								520	0
																	520	5.28376	3.97482	3.34027	4.44569	3.46794	6.68227	3.01964	3.50774								521	0.675676
																	521	3.53798	3.35664	3.43871	5.99465	3.7274	3.34644	3.59584	3.12951								522	0.337838
																	522	3.62214	3.5675	4.71404	5.35504	3.43964	3.13131	3.40037	3.96549								523	0
																	523	3.42607	3.56897	5.84527	5.72097	3.19981	4.26004	3.47631	3.39522								524	0.337838
																	524	4.08369	4.04494	4.18609	5.29692	3.11411	3.00226	3.59634	3.14985								525	-0.675676
																	525	3.22126	3.23859	3.2332	5.35372	3.36702	3.29189	4.12379	4.91957								526	1.01351
																	526	3.88871	5.30844	3.32108	4.18989	3.44312	4.00374	6.38939	3.03372								527	0
																	527	3.42195	3.47048	3.01632	4.55601	3.05111	3.29713	4.4974	4.24959								528	0
																	528	3.13107	4.52047	3.65003	4.04794	3.16682	4.53588	6.49332	4.22668								529	0
																	529	3.92811	3.56577	5.17605	3.34824	4.19949	5.20407	3.20978	3.08901								530	1.01351
																	530	4.80854	3.61175	5.23806	3.21549	3.22088	4.19897	4.39495	3.6355								531	1.01351
																	531	5.43941	3.0908	4.18837	3.31033	3.08589	3.48659	3.58784	3.47122								532	0
																	532	3.33198	3.11761	9.56231	3.44434	3.22709	4.6707	3.37782	3.74304								533	-0.337838
																	533	5.37524	3.06464	6.54905	3.44654	3.46412	3.43489	3.70025	3.34447								534	0.337838
																	534	4.4145	3.39575	4.56362	3.57952	3.1597	6.22375	3.0647	6.39902								535	-0.675676
																	535	5.16274	3.89598	4.59779	3.84893	4.27396	3.37035	3.46343	3.23587								536	0
																	536	3.39772	3.76826	3.87909	3.22288	3.00145	3.40416	3.43088	3.65682								537	0
																	537	3.14173	3.29445	3.39593	3.61052	3.29485	4.3453	3.046	3.0625								538	0
																	538	3.40589	3.21246	3.39809	5.91628	3.84768	5.45762	3.4506	4.113								539	0
																	539	3.60791	5.2094	3.5359	3.42214	3.95405	3.58897	3.02732	3.50409								540	1.01351
																	540	3.49221	3.54017	4.54344	3.22351	3.83832	3.67706	3.05044	3.26921								541	1.01351
																	541	3.77748	3.22143	3.2957	3.50894	4.28259	3.60675	3.49751	3.95771								542	1.68919
																	542	3.85814	4.91298	3.1132	5.39227	3.78296	3.06243	3.554	4.31426								543	2.02703
																	543	4.02492	4.08667	3.96165	3.84743	3.14807	3.2942	5.76122	4.94651								544	0.337838
																	544	3.18173	3.02407	3.4256	3.12574	3.17847	3.82239	3.10908	3.05884								545	1.35135
																	545	3.16327	4.00456	3.20984	3.10613	5.07218	3.24295	4.21981	5.10761								546	1.68919
																	546	3.31648	3.1837	4.19968	3.63451	3.54025	5.23064	3.03655	4.28172								547	0
																	547	3.20236	3.3788	3.6153	3.10703	3.02034	3.55864	3.77495	5.48772								548	0.675676
																	548	3.70902	3.12244	3.94318	3.21429	3.89796	3.53196	4.67572	4.54752								549	0.675676
																	549	3.24853	4.01442	3.60247	6.48495	3.00256	4.10237	3.81326	3.68027								550	0.675676
																	550	3.07899	8.31511	4.54693	3.25028	3.0551	3.19962	4.0294	3.28415								551	1.01351
																	551	3.3546	3.60709	5.32963	5.67205	3.49852	3.20246	3.27318	4.24538								552	1.01351
																	552	3.0004	3.34914	4.02242	5.39651	3.76728	6.44811	3.57124	3.15653								553	1.01351
																	553	3.55457	3.78231	3.63047	4.95323	6.52245	3.20334	4.67432	3.0862								554	1.01351
																	554	3.02155	3.43482	6.04742	4.64475	3.65677	5.41899	3.76313	3.9673								555	2.36486
																	555	3.06443	3.4086	3.2505	4.30058	3.02551	3.9117	3.40977	3.67805								556	1.01351
																	556	3.39864	4.13403	3.17931	5.55291	3.39262	6.84504	3.92234	3.63399								557	-0.337838
																	557	5.12641	3.65869	3.97639	3.28305	3.21668	3.45939	3.04605	10.9068								558	1.35135
																	558	3.5568	3.74635	3.25233	3.32577	5.02954	5.55818	4.31921	3.09954								559	2.36486
																	559	4.10667	4.33169	3.01057	3.30201	3.42501	3.273	3.49884	3.45179								560	0.675676
																	560	3.15355	4.76883	3.30709	3.18224	4.35676	3.38738	3.30484	3.72831								561	1.01351
																	561	3.00648	3.8674	3.05421	3.38976	3.47668	3.82811	3.07013	4.11649								562	1.01351
																	562	3.31713	3.14833	5.54785	3.35845	3.00113	3.57243	3.19286	3.12182								563	1.68919
																	563	3.05344	3.09672	5.41475	3.53938	5.4357	3.0501	3.79355	3.20576								564	0.337838
																	564	3.13294	3.12392	6.2825	3.622	3.24692	3.81899	3.72993	3.16076								565	1.35135
																	565	3.37374	3.54818	3.27198	3.16134	3.02178	4.01576	4.74072	3.86979								566	1.35135
																	566	3.52507	3.34236	4.01879	3.30577	3.03492	3.11489	3.26554	3.22283								567	1.35135
																	567	4.21799	3.28594	4.66581	5.2948	3.52486	3.25966	3.04945	3.76399								568	1.01351
																	568	3.45226	3.68582	6.07733	5.36914	3.20319	3.92139	4.4524	4.61651								569	1.35135
																	569	3.20199	3.17691	7.15405	4.99991	3.20828	4.30334	3.07863	3.08794								570	1.35135
																	570	3.43428	3.58809	3.7126	4.13508	3.54945	3.5199	4.20408	3.51487								571	2.02703
																	571	3.27198	3.6556	3.70597	4.76711	3.84668	4.15846	4.4257	4.06925								572	2.02703
																	572	3.65327	3.19961	3.40758	4.58098	3.0233	3.16391	3.11703	4.06256								573	0.675676
																	573	3.04596	3.18404	3.19578	4.08827	3.18957	4.26413	3.06226	7.49956								574	1.35135
																	574	3.28827	3.8413	3.5179	6.254	3.20492	3.31087	3.49782	4.02787								575	0.675676
																	575	5.6332	3.06376	5.53902	8.68198	3.4806	3.15484	3.28951	3.3099								576	0.675676
																	576	3.0852	4.51695	3.44497	5.10402	3.05864	3.21922	3.11579	3.62833								577	1.68919
																	577	3.34348	3.47888	3.54533	4.04119	3.18024	3.89338	3.1113	3.9266								578	1.68919
																	578	3.25024	3.81092	3.30096	7.95142	3.15906	3.07998	3.13065	3.7334								579	2.7027
																	579	3.49735	4.4908	3.58804	6.99958	4.47456	3.06425	3.32435	3.44992								580	1.01351
																	580	3.03916	3.41586	3.95655	5.40386	3.13007	3.1686	3.00106	3.78405								581	0
																	581	3.04152	3.12479	3.39598	5.36389	3.19395	3.73012	3.36574	3.89615								582	-0.675676
																	582	3.71662	3.19542	4.95821	9.24811	3.50351	3.27511	3.5386	3.31185								583	0
																	583	3.36661	3.36997	3.02544	5.37989	3.77622	3.28675	5.23308	4.58358								584	1.01351
																	584	3.20006	5.19649	4.93356	4.73541	3.10746	3.08917	3.20477	3.03135								585	1.01351
																	585	3.61199	3.09981	4.93434	6.44207	3.33694	4.68741	3.10448	3.61518								586	0.337838
																	586	3.89929	3.50627	4.14966	3.45975	3.13077	3.16827	3.67617	3.04539								587	2.36486
																	587	4.2103	4.52054	4.46773	3.89094	3.10439	3.75143	3.26819	3.07695								588	0.675676
																	588	3.26216	4.00984	5.51122	4.25721	3.09052	3.41485	3.16844	3.07184								589	-0.337838
																	589	3.11137	3.51082	3.71766	3.71638	3.1413	3.07888	3.34508	3.04714								590	0.675676
																	590	3.81171	3.26231	6.71804	4.07249	3.49004	3.15553	3.45115	3.65183								591	0.337838
																	591	3.20143	3.04902	3.06558	4.55622	3.15901	3.70983	3.19977	3.43165								592	0.337838
																	592	4.97514	9.51435	5.01039	3.93862	4.67044	3.70984	4.20029	3.06088								593	0.337838
																	593	3.56008	3.03788	5.14059	3.36912	3.06433	3.10613	3.30347	4.19786								594	1.35135
																	594	3.09685	4.59752	3.10158	3.6478	4.49336	4.64178	4.88669	4.87332								595	0.675676
																	595	3.61743	3.76512	3.11379	3.11728	3.05348	3.22956	3.17416	3.21636								596	0.675676
																	596	3.22636	3.66717	3.14287	3.14645	3.57716	3.50355	3.0359	3.10899								597	1.01351
																	597	3.14102	3.70321	3.15491	4.08285	3.93578	3.54151	3.1046	3.09497								598	1.01351
																	598	3.11447	3.18821	3.25609	3.59931	3.56129	3.70366	3.10794	3.40559								599	1.01351
																	599	4.12578	3.72411	4.21853	5.64263	3.26204	4.71758	3.97493	3.54533								600	1.68919
																	600	4.12719	3.69534	3.02833	4.49913	4.83912	3.17175	4.15367	5.96085								601	1.35135
																	601	4.48867	3.10801	3.05871	4.10346	3.58836	3.55279	3.36832	3.90177								602	2.02703
																	602	4.03031	3.96833	3.1106	5.84309	3.78591	3.37468	3.23157	3.22476								603	1.35135
																	603	4.05987	3.66403	3.66293	3.11627	7.02668	4.13942	3.01471	3.31946								604	1.01351
																	604	3.30343	4.62155	3.59106	4.72053	4.78158	4.00023	3.78595	3.98343								605	2.36486
																	605	4.54626	4.0772	3.11546	3.64464	5.60279	3.09578	3.21997	3.31378								606	-0.337838
																	606	3.14805	3.16935	3.17079	7.24117	6.24122	3.17778	4.25985	3.02247								607	1.35135
																	607	3.3631	4.81445	3.35279	4.86032	4.95776	3.5945	3.53035	5.26953								608	0.675676
																	608	3.0296	3.70302	4.30378	3.06757	8.37593	3.34536	4.06138	5.13791								609	1.35135
																	609	4.00813	3.27002	3.56698	3.56273	5.48633	3.5918	3.38468	4.94614								610	0.675676
																	610	3.32816	3.58039	3.00344	4.39159	5.83407	4.58271	3.78462	3.39691								611	1.01351
																	611	4.15928	4.37895	4.9125	4.02681	5.91367	6.05046	3.38235	4.19289								612	0.337838
																	612	3.32224	3.74692	3.83631	10.4816	4.0566	3.87871	3.45751	3.25847								613	1.01351
																	613	3.20533	3.19198	5.44909	8.42674	5.59528	5.622	4.61234	3.71956								614	1.35135
																	614	4.56255	3.76338	4.76304	6.24804	3.05397	3.347	3.0124	3.27713								615	1.01351
																	615	3.60469	4.71088	4.4375	5.28933	7.69351	3.34233	3.33531	3.09468								616	1.68919
																	616	5.38334	4.18974	3.15957	7.60749	5.76913	3.15571	3.34332	3.70599								617	0.675676
																	617	6.85762	3.31434	4.07521	5.7182	4.12185	5.73251	3.96556	3.18528								618	0.337838
																	618	3.2811	4.23113	5.63099	4.73629	6.13073	3.94479	3.41856	3.33517								619	0.337838
																	619	3.10512	4.96488	7.34632	3.32643	4.42102	3.3955	5.11483	3.13312								620	1.01351
																	620	3.36739	5.05599	4.07598	4.23186	3.26078	3.03044	3.73911	3.17338								621	1.68919
																	621	3.64524	3.13498	5.61933	3.49763	3.57764	3.26672	4.13876	4.82716								622	1.68919
																	622	3.90669	3.16993	5.44781	3.10468	4.95235	4.93393	3.57505	3.58282								623	1.68919
																	623	3.70043	3.59471	6.88535	3.71335	3.63749	3.6133	3.58397	3.21309								624	0.337838
																	624	3.92507	3.18483	4.18336	6.12975	5.23732	3.00089	3.10323	4.17717								625	1.68919
																	625	3.4848	4.2503	4.52385	3.68355	3.68017	3.08326	3.06862	7.39942								626	1.01351
																	626	3.16851	4.98562	3.05182	5.48168	8.29071	3.4242	4.72071	5.27114								627	2.7027
																	627	3.44597	3.06424	3.73654	3.13587	4.23131	4.181	3.44888	4.54136								628	1.35135
																	628	3.50946	3.11961	3.80497	4.77532	4.12435	4.80841	3.5664	3.0892								629	1.01351
																	629	4.09898	4.33433	3.64385	7.1171	5.6477	3.5418	3.35842	4.52634								630	2.36486
																	630	3.16815	3.85013	4.26347	4.13055	4.46536	3.19782	3.46164	3.64048								631	1.35135
																	631	3.23368	3.24614	4.05698	3.45301	4.3101	4.40606	3.03308	3.83304								632	0.675676
																	632	3.96392	3.19515	3.07911	4.77318	5.10159	3.00047	3.66632	3.31735								633	1.68919
																	633	3.74383	3.85833	3.71888	7.03992	6.13327	5.37163	3.09834	4.41646								634	1.01351
																	634	4.09581	7.26623	3.72901	5.72389	6.04817	3.78425	3.07841	3.10737								635	1.35135
																	635	4.4603	3.59616	3.60255	4.90071	3.33783	4.02895	3.12347	3.53837								636	1.35135
																	636	4.734	3.25299	3.29956	10.164	3.93942	3.18579	3.21972	3.71311								637	1.68919
																	637	4.86941	3.06613	5.176	4.65944	3.01758	3.69208	3.74109	3.03585								638	1.35135
																	638	3.51851	4.44332	4.75538	3.41561	3.24295	3.70753	5.36659	3.45171								639	1.68919
																	639	3.52399	5.17027	3.76412	3.36211	3.01379	3.52762	3.35535	3.13541								640	1.68919
																	640	5.50185	3.36918	4.86756	5.41067	3.11006	5.00953	3.09972	3.5551								641	2.02703
																	641	3.14152	3.49769	9.80301	3.81689	10.7442	3.52893	3.38995	3.09198								642	1.35135
																	642	3.03699	3.5633	4.04248	3.99869	11.285	3.3267	3.49769	4.25606								643	1.68919
																	643	3.21828	3.86053	4.32492	3.65933	3.59075	3.29788	3.14762	4.30979								644	0.675676
																	644	3.35133	3.17124	3.01956	4.54261	3.09115	3.56049	3.28115	3.02372								645	1.35135
																	645	3.39457	3.97441	3.95295	6.60784	4.89295	3.10104	3.29213	3.98055								646	1.68919
																	646	4.06895	4.18345	3.55885	4.47101	5.7012	4.07364	3.14149	4.35397								647	2.7027
																	647	3.57911	4.4524	4.86441	3.10588	3.33578	5.11778	3.01341	3.47389								648	1.68919
																	648	3.55865	4.69407	6.60591	3.65586	6.25613	4.30836	3.37824	3.46404								649	2.7027
																	649	3.01149	3.58217	7.76867	3.09432	4.5806	3.02999	3.58827	3.17129								650	3.04054
																	650	3.8905	3.0276	6.71392	3.88062	8.13809	5.11269	3.03061	3.40792								651	2.02703
																	651	3.16757	3.26592	3.20636	3.13632	3.15225	6.19202	3.76534	4.08946								652	2.36486
																	652	5.7693	3.15312	5.91105	3.16086	5.64942	3.20423	3.13861	3.14809								653	2.7027
																	653	3.31688	3.35602	3.02248	3.00635	5.37935	3.37742	3.19472	3.72561								654	1.01351
																	654	10.3345	3.23624	3.32678	3.65052	5.40769	3.1251	3.15334	4.98957								655	2.02703
																	655	5.31517	3.61127	3.17174	3.63317	4.78699	3.93222	3.48682	4.32163								656	1.35135
																	656	3.11288	3.06792	5.00081	4.38662	4.46002	5.68125	4.50348	4.20584								657	3.04054
																	657	3.24427	3.26734	3.94336	3.12806	5.78178	3.55994	4.15531	3.30859								658	1.01351
																	658	6.48112	3.59375	4.1842	3.30451	5.55704	6.56175	4.12015	3.61927								659	0.675676
																	659	3.13523	4.06658	4.23743	4.75405	6.41861	3.42682	3.99949	3.16046								660	1.01351
																	660	3.32707	4.04687	5.70678	3.50577	5.47912	3.50278	3.49073	4.35467								661	0.337838
																	661	3.16767	4.65065	4.62182	5.97346	3.40548	4.94098	3.13151	3.80606								662	-1.01351
																	662	11.1895	3.07128	3.64348	5.07009	3.16885	4.18922	3.2081	3.12262								663	0.675676
																	663	4.7107	3.54161	3.79343	3.61858	3.02792	3.86073	3.24012	3.36768								664	0.675676
																	664	4.01991	3.06818	3.78809	3.36646	3.13911	6.36338	3.10734	4.38402								665	0
																	665	6.74805	3.88573	3.52361	5.85025	3.20887	3.60282	4.28757	4.58638								666	1.35135
																	666	4.11084	3.41844	4.22459	3.23206	3.32051	4.73482	3.18164	3.62396								667	1.35135
																	667	5.67562	3.58343	3.84728	4.34809	3.22756	7.13078	3.31016	3.81864								668	1.01351
																	668	4.21473	3.03797	4.73156	3.06005	3.55903	4.91103	3.10621	4.5692								669	0.675676
																	669	3.41348	3.20658	3.09516	3.06924	10.8394	3.26757	3.39518	3.11852								670	-0.337838
																	670	4.52307	3.05966	10.8546	4.12482	3.72178	3.14693	3.03643	3.33536								671	1.01351
																	671	4.43042	3.02286	6.50996	3.88472	3.08161	3.72734	3.98761	3.14945								672	0.675676
																	672	3.26851	5.95111	4.90155	3.67057	3.85661	3.62569	6.61206	3.15734								673	1.68919
																	673	3.02886	3.93551	5.49351	3.66151	3.12844	3.72735	3.27563	5.84848								674	0.675676
																	674	3.83	4.61142	4.02668	5.61669	3.10868	3.1898	3.03288	3.4766								675	0.675676
																	675	3.3785	3.57908	6.13406	3.87538	3.14161	3.76149	4.38124	6.38286								676	1.01351
																	676	3.32976	3.09629	6.58157	5.82343	7.30524	3.34028	4.51483	4.65237								677	0.675676
																	677	3.13162	4.94523	5.1998	5.72207	3.56628	3.1725	3.13607	3.43446								678	0
																	678	3.14428	3.43002	3.52936	8.52901	3.04688	4.81944	3.3302	3.39853								679	1.35135
																	679	3.65964	3.43857	3.39275	5.72489	3.01014	3.10872	4.33395	4.05853								680	1.01351
																	680	3.179	3.85093	3.04504	4.11439	3.14384	5.92347	3.3897	3.69633								681	0.675676
																	681	4.86126	3.93449	3.00374	5.23807	3.57589	3.14948	3.32353	3.58024								682	0.337838
																	682	3.11797	4.14092	3.62878	6.76231	3.1421	3.75792	3.26367	3.84829								683	-0.675676
																	683	3.11866	5.97052	3.16781	6.66254	5.17128	3.33499	3.34683	3.05079								684	1.35135
																	684	3.03155	3.78819	4.11562	5.22987	3.56166	3.38282	3.75647	4.00829								685	0
																	685	3.19207	3.09921	10.1982	3.23282	4.47624	3.10282	4.06288	3.47726								686	0.675676
																	686	3.13566	3.06907	4.664	4.80826	5.15726	3.90713	4.62999	4.58665								687	1.68919
																	687	3.33131	3.07275	3.58302	3.80013	3.58863	3.68852	3.04047	3.30375								688	0.337838
																	688	3.10095	3.34022	4.7775	3.40887	4.81413	4.32417	3.03739	3.67928								689	0.675676
																	689	4.05455	3.58944	3.5691	4.35205	3.13257	3.321	3.1316	3.84431								690	0
																	690	3.16208	4.64165	4.64829	6.60365	4.69958	3.19993	3.94342	3.80413								691	0.675676
																	691	4.71358	3.40726	3.9011	5.45528	4.9607	3.42771	3.31163	4.49982								692	0
																	692	4.44658	4.13257	3.15215	3.67037	3.65876	3.23511	3.0307	3.06877								693	0
																	693	3.37854	3.48149	3.30332	5.94019	6.86389	3.35853	3.72276	3.38006								694	0.675676
																	694	6.00906	3.17424	4.52558	4.08817	6.55036	3.82797	3.2052	3.18306								695	1.35135
																	695	7.83855	4.41774	4.0386	3.05498	3.67893	3.83178	3.07422	4.92537								696	0.337838
																	696	7.182	4.16295	4.05119	3.96083	5.3698	3.00066	5.46629	5.05925								697	0.337838
																	697	6.59082	4.33474	4.43228	3.10384	5.32978	5.32971	3.24121	3.4105								698	0.675676
																	698	6.82856	3.27183	3.07178	4.62772	3.59684	3.26399	3.22414	3.28644								699	2.02703
																	699	6.46663	3.93515	4.68627	3.48719	4.61529	4.41561	3.54915	3.21335								700	0
																	700	5.22779	4.67249	3.11503	3.88455	4.07323	3.23169	3.66781	3.26251								701	0.675676
																	701	4.59399	3.17986	6.23932	4.48217	7.40319	3.41519	4.16101	3.01159								702	0.337838
																	702	3.03744	4.15213	5.31069	3.56846	3.73919	5.3519	3.51216	3.23119								703	1.01351
																	703	3.54412	3.6966	4.30904	3.34051	3.19383	5.22301	3.40358	4.71776								704	0.337838
																	704	3.17144	3.45634	5.32049	3.54993	3.03263	4.78834	3.52631	5.49001								705	0
																	705	4.30355	3.89606	4.36218	3.17352	4.32004	3.58169	3.60835	3.49375								706	0.337838
																	706	3.02561	3.33338	6.56156	3.0122	3.1536	4.70497	3.08459	3.38908								707	1.01351
																	707	3.1196	3.25104	6.49456	3.14532	3.4526	3.08912	3.45661	4.90596								708	-0.675676
																	708	3.38929	3.0879	3.44522	4.4282	9.85877	3.71529	3.35424	5.00789								709	1.01351
																	709	4.78462	4.63954	5.20502	4.82235	5.9033	4.36653	4.65039	4.09341								710	0.675676
																	710	3.10147	3.97096	7.53455	4.42716	3.04378	3.5112	3.66904	4.565								711	1.01351
																	711	3.24078	3.70118	3.92245	9.96302	3.45726	4.11801	4.27588	3.29566								712	0.337838
																	712	4.06042	3.59277	3.18931	3.04157	3.43387	4.26153	3.55284	3.10622								713	0.337838
																	713	3.01141	3.15352	3.2951	3.41159	3.38169	3.05345	3.92652	3.21534								714	1.01351
																	714	3.71514	6.69308	3.16156	3.50623	3.47807	4.42784	3.10705	3.52746								715	1.35135
																	715	3.17865	3.36639	3.29516	4.35261	3.11579	3.01926	4.09387	4.78046								716	0.337838
																	716	3.42618	3.1307	3.15759	3.63412	3.0679	3.45057	3.10976	5.06024								717	0.675676
																	717	3.02931	4.01785	3.1627	3.41294	3.02832	3.15069	5.03396	4.68507								718	2.02703
																	718	10.2186	3.80939	3.91392	3.92721	3.09938	5.70776	3.43967	4.50041								719	2.02703
																	719	5.45237	3.06587	3.86498	3.00509	8.74863	3.34236	3.3156	4.72947								720	1.68919
																	720	4.57311	3.38735	3.87278	3.96141	3.76087	3.20337	4.40135	4.27702								721	1.68919
																	721	3.9418	3.49164	3.58353	3.80861	3.28475	3.748	3.02082	3.10753								722	1.35135
																	722	3.59564	3.15432	3.8714	4.45544	3.71012	3.01575	3.26998	5.25388								723	1.01351
																	723	4.25899	5.22592	3.19617	3.33321	3.78903	3.4384	3.02585	3.03119								724	2.02703
																	724	3.70764	3.15776	4.74181	3.96399	3.535	3.7933	4.83463	4.51751								725	1.01351
																	725	3.58604	4.37454	6.32331	3.22577	3.33938	3.42788	3.19361	3.97773								726	2.02703
																	726	3.14421	3.90493	4.43927	4.02095	4.36999	3.75748	3.31105	3.80363								727	1.01351
																	727	4.39504	3.23547	4.01024	3.3406	3.12974	3.2932	3.20248	4.82659								728	-0.337838
																	728	8.63909	3.38299	3.74156	3.63035	3.66585	3.72333	3.74589	3.55009								729	0
																	729	3.84451	3.31756	4.28009	3.24374	3.74787	3.55001	3.02731	3.41174								730	2.36486
																	730	7.70751	4.38621	3.9769	3.35324	3.45092	4.36606	3.46097	3.08633								731	1.35135
																	731	5.67431	3.70116	5.76267	3.21363	3.26403	3.94883	3.20242	3.42432								732	0.675676
																	732	5.36063	4.19242	9.87761	7.5884	7.45301	3.56381	3.99493	3.0907								733	0.675676
																	733	4.30567	4.63751	3.47558	4.74672	8.97064	3.12979	3.00135	3.32431								734	-0.337838
																	734	3.75111	5.27866	5.11999	4.33495	3.31224	3.49205	3.01732	3.95174								735	0.675676
																	735	4.27535	3.5213	3.32831	4.73011	3.06901	5.93462	3.28362	3.36852								736	1.01351
																	736	3.45193	4.32742	5.00964	3.32998	3.33975	5.70152	3.33791	4.39573								737	1.35135
																	737	3.78009	3.06824	3.49016	4.86725	3.26364	3.80522	3.12341	3.97487								738	0.675676
																	738	3.36802	3.35668	8.32139	6.26361	4.23223	4.43093	3.31462	3.1553								739	1.68919
																	739	3.21435	4.64887	3.21992	7.82844	3.32527	3.90592	3.34221	3.91824								740	2.02703
																	740	5.36098	3.80657	3.15341	3.17884	3.72946	7.17535	3.35486	3.20744								741	1.68919
																	741	4.33481	4.23737	3.81843	3.21739	3.61965	3.31251	3.50516	3.15453								742	0.675676
																	742	4.58154	3.77274	3.13225	6.33012	3.64771	3.22648	3.37752	3.83808								743	0.675676
																	743	3.43384	3.01613	3.77195	4.06216	3.25693	3.57315	3.90417	3.1422								744	1.01351
																	744	3.18131	3.08996	4.54034	3.62215	3.01667	3.45061	3.67474	3.2951								745	1.01351
																	745	3.18826	3.04435	3.07578	3.57131	3.27944	3.17828	3.47249	3.53293								746	0.675676
																	746	3.30847	3.59685	4.41044	3.33954	3.22427	3.45104	3.11956	3.48221								747	1.35135
																	747	6.5254	3.93144	3.36633	5.13717	3.11908	3.3145	3.22447	3.48845								748	1.35135
																	748	5.36168	3.66466	3.50121	3.64871	3.23632	4.15203	3.1162	3.56236								749	0
																	749	3.77653	3.53584	4.09954	4.51257	3.02596	3.16353	3.0647	3.00431								750	-0.675676
																	750	3.2137	3.56431	3.07741	3.94175	3.57013	3.63786	4.02584	3.45608								751	1.68919
																	751	4.83113	3.60877	6.17392	3.84432	3.31606	4.8082	3.32351	3.11438								752	0.675676
																	752	3.58846	4.53948	3.05443	4.32785	3.69934	6.31545	3.15211	3.69428								753	0.337838
																	753	3.13938	4.55379	5.66716	4.76034	3.33963	3.47743	3.20784	3.02978								754	1.01351
																	754	3.40119	5.23744	3.66151	5.4311	3.62636	3.93801	3.43781	4.68218								755	1.01351
																	755	3.02058	3.68245	5.8619	5.56319	3.74165	4.00949	3.1715	3.81014								756	0.337838
																	756	3.07101	4.64012	3.55501	3.13072	8.67015	3.02579	3.03513	3.49747								757	0.675676
																	757	3.31234	3.8485	3.07661	3.22873	3.16185	3.04893	3.21441	4.10025								758	1.35135
																	758	3.17182	4.3293	3.70955	6.44407	3.06308	3.03916	3.45173	3.34875								759	0.337838
																	759	5.80523	3.6979	5.49093	5.5326	3.09633	3.10895	3.09578	3.30135								760	1.68919
																	760	3.36277	3.30703	4.34656	5.3972	3.42759	4.8851	3.10443	3.85747								761	0
																	761	3.22301	6.04715	4.11786	4.00956	3.8002	3.75837	3.26417	4.28048								762	0.337838
																	762	4.26711	3.60699	3.71232	6.3659	3.09549	4.41708	3.19128	3.0673								763	1.01351
																	763	3.78267	3.12901	3.88784	7.60142	4.2776	4.5815	3.80337	3.04303								764	3.04054
																	764	3.26738	3.46849	4.66436	4.18409	3.7095	3.82431	3.17001	3.01423								765	0
																	765	4.27068	3.182	4.71715	3.29773	4.29965	3.03205	3.06862	6.40934								766	-0.337838
																	766	3.09976	4.04891	5.70132	3.86242	4.54771	3.88581	3.07628	4.2572								767	0
																	767	3.16139	3.41962	6.36926	3.49125	3.80251	4.20534	3.02187	3.12387								768	-0.337838
																	768	3.00264	3.2568	6.02872	5.03733	3.68602	4.61675	4.67313	3.89317								769	1.35135
																	769	3.67366	3.01513	5.32746	3.3223	8.20081	4.01315	3.99471	3.75761								770	1.01351
																	770	3.06186	3.0778	6.0423	3.71083	4.67985	4.55308	3.84558	4.29154								771	-0.675676
																	771	3.43441	4.04914	5.45473	3.88132	3.81849	3.5844	3.18631	5.22715								772	-0.337838
																	772	3.95705	3.01173	3.60121	3.31535	3.38237	4.28179	3.19475	3.22287								773	-0.675676
																	773	3.61172	4.07464	3.76179	5.3673	5.81271	3.46747	6.03984	3.28595								774	-1.35135
																	774	3.03505	3.65753	3.90418	4.65631	5.37063	3.96734	3.53519	3.71128								775	-0.337838
																	775	3.75051	3.47691	3.9202	4.63624	3.36623	3.12052	3.3084	3.24475								776	0.675676
																	776	4.14461	5.38237	3.6422	5.15655	5.38238	4.52042	3.03566	3.22117								777	0.337838
																	777	3.50958	4.09065	3.65811	4.73154	3.33993	3.53271	5.50526	3.7698								778	-1.35135
																	778	3.85797	3.88151	3.42918	3.5452	3.23684	3.86826	3.56146	3.3237								779	-0.337838
																	779	3.03178	5.00677	6.66328	4.56536	3.02044	3.59252	3.59856	4.14988								780	-0.675676
																	780	4.39534	3.23578	5.14684	3.87734	3.98351	3.47689	3.19118	3.28409								781	-1.35135
																	781	3.73607	3.21056	3.17951	3.56716	3.25153	5.2503	5.56074	3.87625								782	-1.01351
																	782	5.61914	3.02763	4.85008	3.86015	3.09586	4.81382	3.44794	3.29999								783	-1.01351
																	783	3.60632	4.29846	3.97674	4.73814	3.71154	4.6081	8.55571	3.06982								784	-1.35135
																	784	3.51352	3.8905	3.59025	4.5431	6.08953	3.26443	4.86149	3.23905								785	-1.35135
																	785	5.09403	4.17866	4.15092	4.57727	4.8655	5.0987	4.14011	3.70006								786	-0.675676
																	786	3.02676	3.15994	5.54405	3.35213	5.84105	4.24559	4.8006	3.71864								787	-1.01351
																	787	6.21251	4.09929	4.92547	4.75182	4.67358	3.00994	4.66913	3.57682								788	0.337838
																	788	3.07693	3.27101	3.89901	3.94519	3.38287	4.01352	3.40185	3.59364								789	0
																	789	3.47729	4.33518	3.82421	3.28852	4.2097	4.24247	7.89442	3.52981								790	0.675676
																	790	4.68253	3.2661	5.2254	3.99467	3.96165	3.78696	3.71368	3.60917								791	0.337838
																	791	3.74484	3.45056	5.72663	4.35505	8.53315	3.7475	3.55668	3.02457								792	-0.675676
																	792	3.21061	3.67445	5.03335	7.32726	3.75328	3.03708	4.73845	3.94702								793	-1.68919
																	793	3.2043	3.39817	3.83085	3.05082	3.65797	4.48762	3.29496	3.74598								794	0
																	794	8.7324	3.26653	4.50214	3.31302	4.15822	3.50468	3.38522	3.25098								795	-0.337838
																	795	4.52556	4.05381	6.14652	3.02251	6.7874	4.45667	3.77137	3.8124								796	1.01351
																	796	3.80976	3.66111	5.02799	4.76146	3.29193	3.17646	3.28808	3.54652								797	-0.337838
																	797	3.89698	3.43893	3.88392	6.69564	4.25003	3.59552	3.19838	4.1753								798	-1.01351
																	798	3.11852	3.9978	5.15915	3.30239	5.47993	3.47322	3.26087	3.06485								799	-1.35135
																	799	3.11529	3.52063	4.66014	3.6503	3.32649	3.40762	3.13606	3.18652								800	-1.35135
																	800	3.44885	4.58156	3.29403	3.86178	3.85819	3.73686	3.098	3.73611								801	-0.337838
																	801	4.51001	3.37744	3.08975	5.24814	3.04967	3.02145	5.30253	3.02507								802	-0.337838
																	802	3.27741	3.14516	3.6215	3.51512	3.74351	3.06753	4.59951	4.15545								803	0.337838
																	803	3.14288	3.14004	3.12422	4.28205	3.16281	3.28529	3.51892	4.83651								804	0
																	804	3.34277	3.20896	3.57393	3.81434	3.45022	3.22719	3.72571	4.55167								805	-1.01351
																	805	3.06266	3.13173	3.2706	3.58461	3.54303	3.49208	3.5752	3.80238								806	0
																	806	4.3741	3.26942	3.17964	5.91075	3.27845	3.96431	3.67323	3.44486								807	-0.675676
																	807	3.12614	3.24167	3.81994	3.25494	3.11936	3.8976	3.25475	3.36113								808	-1.35135
																	808	3.92054	4.41645	3.34394	4.9623	3.40088	3.83482	3.05584	4.9842								809	-0.675676
																	809	4.15984	3.56518	3.5223	4.3067	3.64572	4.03724	3.42472	3.01472								810	0.337838
																	810	4.65883	3.01556	3.12544	3.10049	3.27828	3.87511	3.49963	4.26192								811	0
																	811	4.54279	3.24028	3.286	6.52665	3.64658	3.66353	3.14194	3.38484								812	0.675676
																	812	3.10332	3.18786	4.5328	3.96679	3.11287	3.24084	3.86502	3.47019								813	-0.675676
																	813	3.93788	3.06761	3.28306	4.78086	3.09485	3.45656	3.40388	4.38889								814	0
																	814	3.87348	3.07898	4.17154	3.56004	3.18165	4.151	3.5909	3.18748								815	0.337838
																	815	3.15294	4.08755	3.05937	3.19012	3.24391	5.00228	4.63857	3.42976								816	-1.01351
																	816	3.23384	3.16916	9.19032	3.6303	10.2897	5.06311	7.576	3.11743								817	0.337838
																	817	3.50874	3.48583	6.55407	5.1546	3.82618	3.01937	3.05674	3.05919								818	0
																	818	4.03649	3.08832	7.85464	3.12029	3.06435	4.00709	3.16246	4.39905								819	-0.337838
																	819	3.60834	3.53998	6.45401	3.6489	3.94625	3.35917	3.42085	3.04914								820	0.337838
																	820	3.35622	3.72255	5.11555	8.49165	3.04393	3.22604	3.91248	3.7285								821	0.337838
																	821	3.9461	3.16774	9.06726	4.28282	3.09966	3.57693	3.06561	3.31852								822	1.01351
																	822	3.44252	4.07463	8.43136	3.15063	13.8159	3.23289	3.37353	3.18672								823	1.35135
																	823	4.22453	4.43969	3.26145	3.63195	3.03821	3.63737	3.73482	4.039								824	-0.337838
																	824	3.49913	5.443	3.12676	3.10636	3.43753	3.60902	3.62138	5.05319								825	0.675676
																	825	3.4777	3.67742	3.12161	7.90308	3.46624	3.27989	3.31042	4.36898								826	0.337838
																	826	3.19439	4.23953	3.17127	4.276	3.44486	3.11913	5.61979	3.07525								827	-0.337838
																	827	3.35957	3.64967	4.56861	6.19706	3.45271	4.28152	3.48847	3.50413								828	1.01351
																	828	5.27361	4.02238	3.33459	7.41605	3.13268	3.75955	4.69361	3.41524								829	1.01351
																	829	4.69388	5.18204	3.2796	4.04016	3.02215	3.11377	3.52832	3.27787								830	-0.675676
																	830	4.1848	4.98803	3.55038	4.74253	3.65057	3.32944	4.98644	3.42321								831	0.675676
																	831	5.87918	4.09021	3.14305	5.0161	3.05117	4.83447	4.79629	3.04304								832	1.68919
																	832	4.22005	4.09166	4.99802	3.73988	3.30227	4.69804	5.20999	3.07888								833	0.337838
																	833	3.14989	3.31979	3.25541	4.02939	3.2195	4.11747	3.39922	3.6562								834	-0.675676
																	834	3.34403	4.37437	3.61743	3.18147	4.04529	4.59211	6.02978	3.55418								835	0.675676
																	835	5.10664	3.23209	6.01607	3.22852	3.91727	3.08332	6.20024	3.22549								836	0.675676
																	836	3.53801	7.65958	4.73893	3.89486	4.94021	3.18658	6.10109	3.95896								837	1.01351
																	837	3.58682	3.52413	3.93559	3.90758	5.39051	3.83371	5.30363	4.63146								838	1.01351
																	838	5.4173	3.61895	5.60591	3.17141	3.05327	4.00974	4.33085	3.7861								839	0
																	839	3.18221	4.57365	3.45308	3.80092	4.44896	3.12388	4.65037	3.74825								840	0
																	840	3.17859	3.1291	3.00964	3.05004	3.19	3.01786	3.34642	3.13707								841	0.337838
																	841	3.12394	5.19275	3.09308	4.10997	4.69433	3.78779	4.58036	3.54824								842	0.337838
																	842	3.49482	5.01993	3.67299	4.08804	4.08338	3.5695	3.68494	3.61129								843	1.01351
																	843	3.95297	4.45652	3.91004	3.5173	4.82663	3.25306	4.07804	3.61141								844	0.337838
																	844	3.41093	3.21157	3.33123	3.6308	3.54088	3.05818	6.23987	3.3385								845	1.01351
																	845	3.72546	3.15501	3.52342	3.23859	3.17879	3.44064	4.80616	3.5559								846	1.35135
																	846	6.07542	3.8199	4.50129	5.1497	3.10287	3.17427	3.74762	4.50364								847	0.675676
																	847	4.63607	3.70926	3.09306	3.56256	4.25504	3.30425	4.92669	3.26826								848	0.337838
																	848	3.62002	3.11136	4.30508	4.35268	3.8777	4.52581	4.46168	3.11065								849	0
																	849	3.73895	4.48531	4.46392	3.49718	3.12734	3.25557	4.04061	4.75093								850	0.337838
																	850	7.25298	3.22587	3.37609	3.17063	3.68531	3.53234	3.41151	3.77601								851	-0.337838
																	851	3.32996	3.34487	6.44998	3.09926	3.16265	4.58901	3.40376	4.28461								852	0.675676
																	852	7.34432	4.95202	3.5539	3.18174	3.20541	3.65206	3.93179	3.62215								853	-0.337838
																	853	3.56613	3.12068	3.15021	3.04416	5.9	4.65387	3.19026	3.33531								854	1.01351
																	854	4.0347	3.32425	5.64092	3.17518	3.01134	4.01649	3.26918	3.07931								855	0.675676
																	855	5.14798	3.01905	3.15409	4.14122	3.31786	3.81106	4.36332	4.09705								856	1.35135
																	856	3.8134	3.01978	3.58947	3.2113	3.59462	3.17935	3.49932	3.19239								857	0
																	857	6.45849	4.4774	3.32214	3.14401	3.08066	3.60202	6.46398	3.58484								858	0.675676
																	858	3.32503	3.61354	3.05696	4.24162	3.99504	3.31391	6.87952	3.13233								859	1.01351
																	859	3.69659	3.38158	4.19843	3.27477	3.44527	3.66956	3.64124	4.89629								860	0.337838
																	860	7.27696	4.88269	3.13652	3.98056	3.92658	3.25342	3.99169	3.1758								861	1.01351
																	861	11.8539	4.40354	3.01217	4.80244	4.33497	3.44127	3.69611	3.25875								862	0.675676
																	862	4.29742	3.23325	3.39532	3.5481	4.76799	3.00592	3.44479	3.93291								863	0.337838
																	863	5.62948	3.23381	7.88175	4.06176	3.33388	4.38143	4.20936	4.13364								864	0.675676
																	864	6.30584	3.59132	6.29967	3.15107	3.06156	3.13833	3.23071	3.72502								865	0
																	865	4.99064	4.30305	4.76097	4.23021	3.24591	3.54815	3.01768	3.29891								866	1.01351
																	866	8.68244	3.05324	6.34106	3.31227	3.76734	3.12161	3.43817	3.57535								867	0.675676
																	867	3.65218	3.40752	4.03431	5.15701	3.52835	3.4174	3.25722	3.28316								868	0.675676
																	868	3.03901	3.27388	6.50908	3.84715	4.09254	3.54695	3.18209	3.70907								869	1.01351
																	869	3.44785	3.67268	5.83139	3.21381	4.35553	4.74427	3.17599	3.16918								870	1.01351
																	870	6.16194	3.29558	4.67319	4.77572	3.02541	3.04701	3.02198	4.86407								871	1.35135
																	871	4.2066	3.24642	3.01179	3.50849	4.33483	3.39042	3.40691	3.65041								872	1.01351
																	872	3.30897	4.7137	3.80318	3.79683	3.07649	3.57789	4.25854	5.16176								873	0.337838
																	873	4.02889	3.08819	3.4511	3.60332	4.2624	4.5044	3.04884	4.0493								874	-0.675676
																	874	3.34385	3.84957	4.6855	3.83104	6.60546	4.57645	3.59118	5.09198								875	0.337838
																	875	5.42179	6.69871	3.96771	6.76479	5.94193	3.18935	4.62211	3.28331								876	-0.337838
																	876	8.75411	3.60986	4.15079	5.74081	6.30337	3.11014	4.67326	3.81219								877	0
																	877	4.36847	3.07816	4.06643	6.99481	5.31119	3.42477	3.384	3.49435								878	0.337838
																	878	5.18341	4.14279	3.07555	3.91285	6.44979	3.05615	3.39543	3.69474								879	-1.35135
																	879	3.0473	3.70453	3.18777	3.75967	6.76604	5.39561	5.67832	3.44083								880	1.01351
																	880	3.53072	3.31622	3.45012	3.71225	5.13801	3.58805	4.40939	3.88209								881	-1.35135
																	881	4.46309	3.05653	4.53048	4.01731	4.34633	3.35134	6.4304	3.50095								882	0
																	882	3.40879	3.10459	5.05801	3.88396	5.31198	3.00562	5.71036	5.11298								883	-0.337838
																	883	5.37847	3.49378	3.39801	5.48698	5.81352	3.83049	4.24595	3.2161								884	-0.675676
																	884	7.09879	3.58533	3.77187	4.11598	5.18409	3.08529	3.87164	3.66218								885	1.68919
																	885	6.15842	3.22451	6.3907	5.45271	7.07745	3.50604	4.03385	3.65351								886	0.675676
																	886	6.53721	5.56615	3.64753	4.55479	6.23083	3.34216	3.97132	4.3307								887	0
																	887	5.38773	3.13748	3.36071	3.6484	6.44661	3.58138	5.65961	3.409								888	-0.675676
																	888	8.19243	3.2302	4.18369	5.18742	4.09193	3.55101	3.05122	6.92982								889	-0.337838
																	889	7.25852	3.06394	7.16377	6.07503	4.61832	3.08084	3.27329	3.96144								890	-0.337838
																	890	4.46586	3.96636	3.35154	6.89904	3.54497	3.50847	3.08716	5.34737								891	0.675676
																	891	3.9642	3.08921	7.02128	3.05505	3.54218	3.16654	3.73691	3.23082								892	0.337838
																	892	3.2542	6.10841	5.25355	3.06118	3.45838	4.56501	3.69691	3.00321								893	0.675676
																	893	3.24223	3.2421	3.05412	3.18503	7.37091	3.08391	3.13903	4.73078								894	0
																	894	4.99938	4.42816	3.6916	3.10063	3.89992	3.22892	3.08546	3.09589								895	0
																	895	8.33119	4.1228	3.6316	3.37173	6.40862	3.18319	3.0075	3.338								896	0
																	896	6.29718	3.3747	4.18601	4.451	6.3042	3.08005	3.02657	3.07171								897	-0.675676
																	897	5.80037	3.19125	5.60593	4.04394	4.66928	6.01543	3.96788	3.07849								898	-0.337838
																	898	3.30972	3.38198	3.29223	6.82122	3.32306	3.89314	3.10079	3.33703								899	0
																	899	4.01769	3.87446	3.16332	3.10757	3.1477	4.46269	3.84178	3.61111								900	0.675676
																	900	3.70489	3.09626	4.62715	5.96789	3.55481	3.71555	3.01503	3.008								901	0
																	901	6.56222	3.46516	4.464	3.67566	3.31925	4.18104	3.05608	5.2177								902	0.337838
																	902	3.71912	4.10523	3.30442	3.48767	3.35473	3.58021	3.06926	4.44274								903	0.675676
																	903	3.39375	3.0629	4.91433	3.61289	3.03501	4.07254	3.1939	4.37384								904	-0.337838
																	904	3.77967	6.55808	3.28952	4.39623	3.22308	3.10979	3.00741	3.43487								905	-0.337838
																	905	3.73852	3.20437	3.03695	3.30779	3.10936	3.04977	3.22315	4.12336								906	0.337838
																	906	9.71875	3.27626	3.1375	3.51005	3.2945	3.89224	3.25541	5.51305								907	0
																	907	5.6143	3.08749	4.0666	4.85901	3.44477	3.11704	3.1242	3.68946								908	0.337838
																	908	4.89034	3.19225	5.52299	4.21202	3.16228	3.80118	4.23885	3.20817								909	0.337838
																	909	5.40789	3.674	3.17127	4.20884	3.87016	5.94014	3.0969	4.52132								910	-0.337838
																	910	3.00918	3.43441	4.03153	3.30082	3.98868	3.6487	3.08491	3.57397								911	0.337838
																	911	4.35987	3.17126	4.95632	3.88237	3.60345	5.22307	6.24457	7.06235								912	0.337838
																	912	4.3798	3.26899	3.18246	3.73426	3.12875	6.79627	3.80134	3.63993								913	-0.337838
																	913	3.11024	3.18588	6.9541	3.31433	3.05816	4.63279	3.15939	6.53015								914	0.337838
																	914	3.91987	3.00964	3.97985	3.08323	3.00559	4.64769	4.35101	5.56385								915	0.675676
																	915	3.0916	3.8351	3.24259	3.13481	4.19458	3.47725	3.44229	3.30709								916	0.675676
																	916	4.15398	4.16487	3.09014	3.58083	3.39225	3.29866	8.56762	3.51141								917	0.675676
																	917	3.74196	5.44608	3.82603	3.31347	4.53202	4.25064	5.98015	4.36919								918	0.675676
																	918	4.06892	3.28216	3.37051	4.27095	3.40407	3.68555	4.35801	3.70579								919	0.675676
																	919	3.48483	3.7242	3.22387	5.70149	4.49887	3.27653	3.34008	4.34188								920	0
																	920	4.37747	3.66573	3.25147	4.30229	3.8046	5.13281	3.96806	3.09012								921	0.337838
																	921	6.23716	3.32371	3.33801	3.3102	3.39592	3.93074	3.01491	6.913								922	0.675676
																	922	5.88718	4.84716	4.96392	3.20207	3.08864	3.37156	5.30167	3.65148								923	0.675676
																	923	7.99534	3.38519	4.69312	3.02453	3.13429	3.82276	3.43734	8.45092								924	0.675676
																	924	6.87829	3.48013	4.50007	4.93647	3.30411	3.13731	3.06939	5.69001								925	0.675676
																	925	8.56117	3.03355	4.48991	3.30556	3.91908	3.08943	3.29633	3.89674								926	-0.675676
																	926	7.87339	3.91899	4.83877	3.43258	4.44909	4.35247	6.36528	3.91869								927	-0.506757
																	927	4.64466	3.85344	4.50631	4.25407	6.21715	3.68685	3.51428	3.63519								928	-0.168919
																	928	3.76182	5.21617	3.44194	4.39958	5.24038	3.97776	3.87528	3.76328								929	-0.168919
																	929	3.11189	3.20228	3.36463	4.97422	3.59168	6.26649	3.05956	4.38109								930	-0.506757
																	930	4.0823	3.02652	4.46996	3.75303	3.90443	3.14424	3.77586	5.46534								931	0.506757
																	931	3.17771	3.20641	4.54182	9.08961	3.02155	4.81349	3.95939	3.29909								932	-0.168919
																	932	4.00065	3.26785	3.90822	5.78744	3.27016	4.22351	3.40493	3.8395								933	-0.506757
																	933	3.23819	3.38713	4.73756	5.4478	3.58836	3.45977	3.78511	3.05565								934	-0.168919
																	934	4.09179	3.31371	6.40809	8.18476	3.10074	4.72773	3.09303	3.04771								935	-0.506757
																	935	3.96041	3.03291	4.1332	4.0187	3.23418	3.75425	8.66234	3.26125								936	0.168919
																	936	3.2176	3.44585	4.13741	3.06767	3.16718	4.10704	3.72744	4.00338								937	0.168919
																	937	4.01778	3.12682	3.58643	3.22537	3.12779	3.92721	3.10415	3.25706								938	-0.168919
																	938	3.12747	3.83359	3.4749	4.41889	4.77991	3.5975	3.05351	3.84411								939	0.168919
																	939	3.87101	3.13155	3.07407	3.53615	3.57576	4.03881	4.96273	3.37282								940	-0.168919
																	940	4.31214	3.40868	3.5104	3.08551	3.21141	3.00259	3.389	3.14206								941	-0.506757
																	941	3.71149	3.00619	3.49674	3.61601	4.7273	3.29911	3.09545	3.35343								942	0.168919
																	942	3.40616	4.74735	4.61917	3.97525	3.82565	3.59568	3.13011	5.85367								943	-0.506757
																	943	3.10985	3.10811	5.26652	3.11081	4.12485	3.70639	3.71815	4.99153								944	-0.168919
																	944	3.03593	3.08902	3.05321	4.84343	3.21941	3.73374	4.29281	3.01647								945	-0.506757
																	945	3.81985	3.38394	3.98582	3.0898	3.2685	4.01023	3.06047	5.28776								946	0.168919
																	946	3.23322	3.30168	3.01134	3.61422	3.53678	3.2814	4.59533	3.83644								947	-0.506757
																	947	4.34472	3.30031	3.75584	4.27708	3.26625	3.46595	5.61884	3.10648								948	-0.168919
																	948	5.48998	3.95427	4.00483	4.1369	3.78395	3.19825	3.80366	8.66904								949	-0.506757
																	949	9.31084	3.95689	3.1217	4.00447	3.53931	3.16155	5.26851	3.63191								950	-0.168919
																	950	3.50403	3.86696	3.81843	4.3664	5.97695	3.7956	5.75696	6.9341								951	0.168919
																	951	4.80357	3.02403	3.42732	5.66441	3.54799	3.80256	3.61984	6.43517								952	1.18243
																	952	3.14842	3.4459	3.88588	5.87545	4.40046	3.23597	4.35766	3.69143								953	-0.168919
																	953	6.42813	4.41865	10.2853	4.91493	7.30487	3.53694	5.46348	3.70812								954	0.844595
																	954	3.48311	3.07904	3.5815	4.46565	5.13333	3.94983	3.16493	3.93144								955	-0.168919
																	955	3.06422	3.04812	4.62297	5.44024	3.16231	3.14445	5.23784	3.32511								956	0.168919
																	956	3.34573	3.24873	10.0101	3.58631	5.75334	3.95895	3.09944	4.8358								957	-0.168919
																	957	3.03044	3.68882	3.03934	4.40179	3.09271	3.28872	3.45606	3.48507								958	0.506757
																	958	4.43861	3.082	4.36548	3.328	3.43248	4.05343	3.80563	4.77446								959	0.506757
																	959	3.31543	3.27577	3.4922	5.03512	4.02942	4.33334	3.65529	3.11381								960	-0.506757
																	960	3.44634	3.01578	3.03248	7.21354	3.89194	3.83968	8.95711	5.65905								961	-0.506757
																	961	3.77723	4.66874	6.54373	4.15925	3.4242	3.59735	3.54318	5.29801								962	0.168919
																	962	5.56973	3.29079	3.88605	5.56496	3.72298	3.17197	4.65752	3.26233								963	-0.168919
																	963	3.32461	3.81873	7.29923	4.19516	3.34264	3.5581	3.04286	4.20135								964	1.18243
																	964	16.4776	5.48577	3.21507	4.23711	4.29428	5.78357	5.39207	4.16893								965	0.168919
																	965	4.09757	5.31209	5.28108	5.59919	3.20794	3.38124	6.0299	3.43696								966	0.506757
																	966	3.05403	3.70261	4.21601	4.57617	3.26274	4.05249	4.07047	5.56849								967	-0.506757
																	967	3.08129	3.2863	7.86078	3.06424	5.18876	3.21924	3.7439	5.33945								968	2.19595
																	968	3.23396	3.07608	3.26355	6.12921	3.21779	4.96232	3.66159	3.18154								969	0
																	969	3.61637	3.2542	3.1462	6.644	3.33092	3.09438	3.12852	4.78914								970	0.337838
																	970	3.07846	3.1659	6.02432	4.14223	3.642	3.39202	3.95856	4.65287								971	0
																	971	3.71277	5.68453	4.35615	5.58241	3.91382	4.97385	3.54161	3.48354								972	-0.675676
																	972	3.535	4.28396	3.63012	5.13911	3.15406	7.14366	4.77614	3.89816								973	0
																	973	3.21672	4.03544	4.3954	3.26919	3.12102	3.67792	3.00798	4.71588								974	-0.337838
																	974	3.87639	4.20343	4.29467	3.15955	3.28924	3.61406	3.2648	4.14415								975	0
																	975	8.98251	3.29453	5.25122	4.38658	3.00073	4.59698	3.16238	3.10308								976	0.337838
																	976	3.26376	3.42919	5.11597	5.35063	3.01495	3.38833	3.49145	3.33259								977	-1.35135
																	977	3.45589	4.34677	3.0874	4.96552	3.35617	3.5167	3.88856	3.7682								978	-0.337838
																	978	3.26085	3.60877	4.76282	4.6128	4.31533	3.67308	3.98652	4.06574								979	0
																	979	11.5803	3.45671	3.16975	4.00793	4.07548	4.77644	6.46169	3.18737								980	0.675676
																	980	14.5107	3.04518	3.53496	5.1553	3.11071	3.47067	5.64191	3.21991								981	0
																	981	3.55936	3.13312	3.65892	4.62554	3.57082	3.66711	5.47326	3.2695								982	0.675676
																	982	3.36857	3.62674	3.17171	4.10883	3.45652	3.48312	4.63796	3.86064								983	0
																	983	4.11802	4.06149	3.29186	3.19943	3.98633	3.16655	3.33845	3.48008								984	0
																	984	3.06919	3.09918	3.35567	3.46306	4.31163	4.19924	3.36794	3.5187								985	1.35135
																	985	6.06509	3.05468	4.04846	9.5883	4.05358	3.93367	3.25608	3.11783								986	0.337838
																	986	6.13562	3.28587	3.61058	5.70834	4.35658	3.22805	3.21566	3.54369								987	0.337838
																	987	6.20482	3.42793	3.21282	7.78081	3.02733	3.26847	4.01973	4.34917								988	0
																	988	3.0753	3.87772	3.24258	8.20628	4.26365	4.20549	3.45894	3.64125								989	0
																	989	3.24958	3.71613	3.44316	7.41598	3.09233	3.10032	3.23081	3.15507								990	0.675676
																	990	3.40501	3.10746	5.74766	4.01226	6.46893	4.29897	3.21751	5.04145								991	0.675676
																	991	3.30441	3.88268	4.34132	6.31239	3.07008	4.168	3.42222	4.53845								992	0
																	992	3.66465	3.6186	4.09679	5.39296	3.38349	3.37339	3.18888	4.45283								993	0.675676
																	993	3.3134	4.01228	3.22277	4.24277	3.61881	4.67653	3.05161	4.70288								994	0
																	994	13.3681	3.5384	4.01104	5.58961	3.24453	3.11831	3.03875	3.29129								995	-0.675676
																	995	10.7095	3.73449	3.49879	4.99502	3.02426	3.0606	3.20837	9.83159								996	-0.337838
																	996	4.01231	3.03386	3.11707	5.6829	4.00179	4.80018	3.47162	5.36102								997	-0.675676
																	997	7.75467	3.20522	9.73549	4.47679	3.934	3.18242	3.21988	8.19267								998	0.337838
																	998	12.7677	3.62653	3.64398	3.62766	3.73169	3.26121	3.6562	4.36155								999	0.337838
																	999	3.30677	3.25758	6.00587	5.63637	3.59895	3.24655	3.157	5.71569								1000	-1.01351
																	1000	3.06029	3.42244	3.50648	4.13847	3.6831	3.84217	3.0064	3.18125								1001	0.337838
																	1001	3.33204	3.12928	4.24213	4.10712	4.18253	3.03866	3.15484	4.76624								1002	0.675676
																	1002	3.31486	5.10933	3.79743	5.14378	5.71685	4.80704	3.04738	3.90953								1003	0.337838
																	1003	3.35933	3.92872	3.82571	3.30681	4.83963	4.82146	4.1557	3.10824								1004	1.01351
																	1004	3.09396	4.5618	3.98593	6.18729	6.47233	6.87744	3.46159	3.08597								1005	0.337838
																	1005	3.2492	4.06919	12.9373	4.81703	5.33913	3.16047	3.01168	4.91558								1006	0
																	1006	3.10971	4.79512	3.7309	5.02199	4.48308	3.6184	6.85718	3.28867								1007	-0.337838
																	1007	3.32439	5.01771	4.92975	6.66075	6.13515	5.23372	3.16316	3.52121								1008	0.675676
																	1008	6.42853	3.24194	4.62311	4.50923	5.41187	4.60636	3.9606	3.43093								1009	1.01351
																	1009	7.81868	3.27423	5.73815	3.44377	9.81732	6.44791	3.05201	3.92151								1010	0.337838
																	1010	8.47468	3.33913	6.85132	3.38581	3.42163	3.28634	3.68574	3.4707								1011	0.675676
																	1011	3.28714	3.30733	4.36482	3.06316	7.54267	4.20761	4.23413	3.99295								1012	0
																	1012	3.46691	3.28105	5.19262	3.47602	5.76445	6.13218	3.24542	3.04331								1013	1.01351
																	1013	4.04766	3.81773	3.82291	3.11839	4.7208	3.00384	3.65079	4.92532								1014	0.675676
																	1014	4.57404	3.97562	3.78495	3.88487	3.85487	3.33441	3.80897	3.44791								1015	0.337838
																	1015	3.11581	3.7376	3.03454	3.44742	3.52211	3.78004	3.74313	4.34859								1016	0.675676
																	1016	3.2405	3.96906	4.10887	3.17762	5.86149	3.97226	3.47769	3.83918								1017	1.01351
																	1017	3.04166	3.33345	3.26489	3.02711	7.25853	4.47415	3.1149	3.55518								1018	0
																	1018	3.12446	3.73932	3.72096	3.0399	4.22134	3.48466	3.36566	3.54679								1019	0.675676
																	1019	3.57279	3.71573	3.1504	3.83859	3.42799	3.17815	9.80451	5.39863								1020	0.675676
																	1020	3.91017	4.18666	4.9799	3.89954	5.85429	4.59502	4.51737	3.88216								1021	1.35135
																	1021	3.04399	3.44209	3.52505	6.46837	5.04335	3.72247	5.14343	4.98616								1022	0.675676
																	1022	3.94273	3.63562	3.45847	3.51992	9.59458	3.39084	5.0674	5.10568								1023	1.35135
																	1023	3.29082	3.8047	3.11716	3.17551	3.76978	3.07709	4.87227	3.41398								1024	0.675676
																	1024	3.78623	3.92004	3.41678	7.64897	3.8222	3.22824	4.39538	3.27831								1025	1.01351
																	1025	3.04982	3.12462	3.26798	3.5701	3.30532	3.97938	6.10596	4.91777								1026	0.675676
																	1026	3.01062	4.38207	3.15596	3.4081	3.04313	3.47781	3.61194	5.50817								1027	1.35135
																	1027	3.85345	3.4392	13.3842	4.8024	3.10812	4.32168	3.0038	5.37255								1028	0.675676
																	1028	3.96995	3.69425	3.36659	7.68575	3.62608	3.42827	3.14499	5.26863								1029	0.337838
																	1029	3.23434	4.21579	3.4191	7.11782	4.00121	4.07028	3.69436	5.09128								1030	0.675676
																	1030	3.10029	3.36049	4.76226	4.99411	3.60289	4.32272	3.19046	6.25659								1031	1.01351
																	1031	3.35782	3.57084	4.90885	4.94542	3.43912	3.47064	4.04075	4.44326								1032	0.675676
																	1032	3.73602	4.36581	3.11038	5.53367	3.0528	3.05256	3.09832	3.69715								1033	0.337838
																	1033	3.29699	4.01029	3.57711	3.94012	3.00391	3.30172	3.25174	3.62376								1034	1.01351
																	1034	14.218	4.00531	4.19692	3.15387	3.62645	4.28152	3.10705	3.31897								1035	0.337838
																	1035	12.1311	3.66229	4.25482	3.85811	3.19972	3.01392	3.28657	3.38827								1036	0.675676
																	1036	4.38511	3.32629	4.79507	4.48966	3.33056	4.32681	3.6976	3.04447								1037	1.01351
																	1037	3.17463	3.61686	3.82523	4.10892	4.23841	3.40489	4.08001	3.58353								1038	1.68919
																	1038	4.00659	3.0472	4.09818	3.987	3.03061	3.37125	6.01117	3.41623								1039	2.02703
																	1039	4.97982	4.32635	3.43507	4.125	3.47013	3.40364	4.02326	3.22359								1040	0.675676
																	1040	3.01499	3.54817	4.1271	6.84434	3.04967	4.52346	3.27204	3.60509								1041	0.337838
																	1041	10.1884	4.69229	4.15079	3.19964	5.00525	3.85651	3.03287	4.85282								1042	0.675676
																	1042	15.1707	3.06138	3.23738	5.81505	3.5152	3.64992	3.53746	4.72233								1043	0.337838
																	1043	4.71646	5.29767	3.21388	5.66176	3.42596	3.76905	3.88042	3.88079								1044	0
																	1044	3.33717	4.89909	3.04968	7.83352	3.14077	6.45346	3.28851	4.47057								1045	1.35135
																	1045	3.67369	3.86031	3.22118	4.45993	3.11704	3.1635	4.13846	4.08312								1046	1.68919
																	1046	3.06394	3.41346	5.25763	4.32611	3.00198	5.35645	3.487	3.80838								1047	1.35135
																	1047	3.05723	3.30736	4.48222	4.35495	4.89865	3.2325	3.80228	4.72106								1048	1.68919
																	1048	3.72746	3.46298	5.29179	6.78533	3.43107	4.56471	3.96571	3.2539								1049	0.675676
																	1049	3.08958	3.34175	4.21807	6.34476	3.20364	3.04442	3.87478	3.43233								1050	0.675676
																	1050	6.41267	3.05793	3.0763	3.21009	3.74118	4.18687	4.17988	5.28008								1051	1.68919
																	1051	3.04753	4.34661	3.14094	4.15402	3.53979	3.48303	3.1912	4.03187								1052	2.02703
																	1052	3.96384	3.29241	7.06369	3.24406	3.50529	3.10082	4.97204	4.95894								1053	0.337838
																	1053	3.14607	3.32633	3.00934	5.18976	3.18854	4.53558	4.67675	3.80684								1054	1.01351
																	1054	4.13675	4.3583	3.00161	5.0144	3.80875	3.95455	3.67849	4.41197								1055	2.36486
																	1055	6.43917	3.1579	3.16938	3.88027	3.43511	3.28043	3.0282	3.07645								1056	0.675676
																	1056	3.05423	3.37541	5.97823	3.71337	3.26804	3.72601	3.67296	3.73973								1057	1.68919
																	1057	3.1578	6.3376	6.12839	3.3553	3.53842	5.33221	3.09395	3.06336								1058	0.675676
																	1058	7.84954	3.25858	3.20813	6.72275	3.02388	3.17925	3.00024	4.65233								1059	2.7027
																	1059	8.47357	3.39437	3.17776	3.42084	3.66626	3.74988	3.06544	3.78413								1060	0.675676
																	1060	4.4035	3.14048	3.09973	5.87717	3.55749	3.16787	4.26102	4.09061								1061	0.337838
																	1061	4.31207	3.55365	3.03249	3.37846	3.10297	3.41863	4.40557	5.41036								1062	-0.337838
																	1062	3.10232	3.17808	3.63681	6.88726	3.19293	3.22503	4.70491	4.86952								1063	1.35135
																	1063	9.93154	4.46724	12.3403	5.3914	3.08808	3.14653	4.32802	3.33425								1064	0.337838
																	1064	11.6582	5.03709	5.95877	5.94468	4.07139	4.20755	3.85208	3.4232								1065	0.337838
																	1065	4.90957	4.89552	3.52588	4.46207	3.63434	3.21316	3.43792	3.14683								1066	1.35135
																	1066	13.2732	3.68933	4.64019	4.69849	3.10548	6.16351	5.68441	3.18114								1067	0
																	1067	3.12929	3.39696	3.42748	4.29422	4.62394	3.32566	5.62776	4.10903								1068	-1.35135
																	1068	5.17664	3.23528	3.07678	4.86391	3.03403	3.98161	5.96914	3.9434								1069	0
																	1069	3.3541	4.09232	3.29689	4.81682	3.25572	3.75782	3.01368	3.77476								1070	0
																	1070	3.2211	3.1915	3.46662	4.43036	3.7044	3.2582	5.11775	3.51227								1071	-1.01351
																	1071	3.00018	3.22795	4.24944	4.58999	3.02414	3.31524	3.34083	3.20706								1072	-0.337838
																	1072	3.06421	3.66386	3.41598	4.47515	3.55067	3.8436	3.41617	5.21682								1073	-0.337838
																	1073	7.45122	3.17508	3.80767	5.06031	3.56393	4.01074	3.02298	3.55604								1074	0.337838
																	1074	3.39312	4.10566	4.33483	5.39032	3.30285	4.2964	4.07077	4.3097								1075	0.337838
																	1075	5.73827	3.03004	4.28322	3.54781	3.55112	3.2717	3.49085	3.33942								1076	0.337838
																	1076	6.78791	3.07944	5.30715	4.36235	3.66372	3.13661	3.38615	4.70487								1077	-0.337838
																	1077	15.5491	3.68782	4.46992	3.57716	3.24122	4.49083	3.58288	3.81152								1078	0
																	1078	9.61914	4.27373	3.1897	3.5405	3.38276	3.57182	3.25914	3.22385								1079	0.337838
																	1079	3.001	3.75689	4.51241	5.23571	3.79082	3.0637	3.42441	3.54459								1080	0
																	1080	3.07626	3.16671	3.17541	4.66297	3.4307	3.06735	3.05147	3.71583								1081	0
																	1081	10.6467	3.14218	3.39891	3.36684	3.30893	3.57252	4.75065	3.23062								1082	0.337838
																	1082	3.13964	5.04638	3.86546	3.40492	3.34855	3.09252	3.44744	4.21084								1083	-0.337838
																	1083	3.01199	6.25986	3.22762	4.2485	4.06449	3.92477	3.1643	3.45804								1084	-0.337838
																	1084	4.33221	3.551	3.81904	3.47866	3.46395	3.46437	3.40321	4.04945								1085	0
																	1085	3.88448	3.45032	5.50254	3.41277	5.52345	3.50783	3.05228	3.12387								1086	0.337838
																	1086	3.3649	4.13216	3.92838	6.18422	3.24411	3.13087	4.3222	3.9937								1087	-0.337838
																	1087	3.41366	3.22075	6.2852	3.95521	3.076	4.62339	3.60402	3.52094								1088	0
																	1088	3.20591	4.94044	6.06658	4.04884	3.44285	3.36667	5.90464	3.95437								1089	-0.337838
																	1089	3.48506	4.30527	6.14742	3.31784	6.60537	3.35558	4.517	4.19295								1090	-0.337838
																	1090	11.5693	3.25033	3.34974	7.0896	4.10591	3.00257	3.22421	3.13085								1091	0.337838
																	1091	3.08402	3.04373	3.64045	4.99808	5.24965	3.31649	3.63747	3.78951								1092	-0.337838
																	1092	3.39425	3.0259	3.23628	5.13636	3.25011	3.07055	3.29662	6.07818								1093	0
																	1093	3.00442	3.41622	3.84264	3.3246	4.75899	4.44815	4.00539	7.17123								1094	-0.337838
																	1094	3.44974	3.60064	3.43141	11.2617	3.4634	3.72742	3.63493	3.48834								1095	0.675676
																	1095	3.16581	3.35469	3.30515	8.52211	3.30614	3.72828	3.14581	3.0936								1096	0
																	1096	3.55153	4.15036	3.65523	6.86769	3.30771	4.75231	3.08441	3.74408								1097	0
																	1097	3.44733	3.52557	3.00244	4.08313	3.20158	3.74615	3.93457	4.84773								1098	-0.337838
																	1098	8.57613	4.39577	3.21243	4.59559	3.33036	3.00744	3.34355	6.2163								1099	0.675676
																	1099	3.03783	4.57567	3.54533	5.11485	3.24485	5.74406	3.25992	3.38134								1100	0
																	1100	3.42734	4.93542	4.2174	3.21033	3.18302	6.27909	3.1349	7.34578								1101	-0.337838
																	1101	3.03457	3.3918	3.11426	3.71524	3.56449	3.03649	3.20484	5.39261								1102	0.337838
																	1102	4.78592	3.53052	3.05944	3.25192	3.16352	3.08789	3.62155	3.86329								1103	0.337838
																	1103	3.0347	3.09146	3.20619	5.32383	3.79242	3.62067	3.28919	3.80105								1104	0.337838
																	1104	3.08575	3.40271	3.70672	4.29876	3.84594	3.61767	3.31422	3.39456								1105	-0.337838
																	1105	3.18032	3.23781	3.43372	5.93603	3.43771	3.16793	3.09166	6.03518								1106	-0.337838
																	1106	3.7722	3.77421	3.74475	3.34241	3.10902	4.77167	3.65211	4.58535								1107	0
																	1107	3.09876	3.09214	3.21443	3.32026	3.04505	3.22462	4.22091	3.18637								1108	-0.337838
																	1108	3.36131	4.38335	3.76619	3.02198	4.06764	4.03855	3.2264	3.26433								1109	1.01351
																	1109	16.1229	3.13768	5.21793	3.24851	3.10832	3.90384	4.08691	3.60252								1110	1.01351
																	1110	3.32846	3.85826	4.19278	4.23414	3.78281	3.03325	3.67966	4.24493								1111	0.337838
																	1111	3.60258	4.02216	3.98892	3.96045	6.31022	4.17008	3.32824	4.43905								1112	-0.337838
																	1112	8.11293	3.4923	9.31841	4.95343	3.44451	3.42846	3.02649	3.52074								1113	0
																	1113	4.18747	3.43534	3.23635	4.65158	3.25618	6.1773	3.10515	3.44435								1114	1.01351
																	1114	3.0181	3.12594	6.78505	4.27957	5.0725	3.59272	3.71774	3.04044								1115	0.675676
																	1115	4.3978	3.20628	6.4373	4.40928	3.74535	3.5828	4.228	5.52721								1116	1.01351
																	1116	11.3941	3.10788	6.93528	3.28599	3.29324	3.02727	3.0105	3.37496								1117	0.675676
																	1117	3.02023	3.33077	3.39616	3.90993	3.46275	3.33723	3.30453	5.31245								1118	0.675676
																	1118	6.07498	5.518	8.47717	3.7544	3.30831	6.35813	6.16371	4.22878								1119	0.337838
																	1119	3.90168	3.02468	3.14349	3.57785	3.1041	3.28883	3.23868	3.06837								1120	0
																	1120	3.03528	3.15874	3.35404	3.1722	3.15853	3.18426	3.26563	3.10235								1121	0
																	1121	3.15571	3.3602	3.17777	3.55123	3.1553	4.84505	3.02226	3.9004								1122	1.35135
																	1122	4.77142	3.93055	3.08408	3.30384	3.27174	3.01134	3.58511	3.65324								1123	1.01351
																	1123	3.28795	3.14407	4.82565	3.92187	3.1195	3.71803	3.41315	4.45476								1124	0.675676
																	1124	3.06769	3.94905	8.03838	3.98353	3.30288	3.07035	3.32182	7.87108								1125	0.337838
																	1125	3.29471	3.51613	5.84801	3.47718	3.6661	3.21412	3.59437	3.81964								1126	0
																	1126	3.20983	4.20433	3.09346	3.36286	3.54773	3.152	3.8909	5.47062								1127	1.35135
																	1127	3.05152	3.48416	3.03688	3.03326	3.3352	3.21813	4.47902	3.11601								1128	1.68919
																	1128	7.39025	3.12126	3.33442	3.26827	3.12671	3.868	5.0909	3.27358								1129	1.01351
																	1129	5.66801	3.94341	3.44362	3.60715	4.95315	3.52179	3.55259	3.38224								1130	0.675676
																	1130	6.27657	4.24098	3.35012	3.28521	3.31126	5.50181	3.34779	3.6553								1131	1.01351
																	1131	16.1494	3.42736	3.04112	3.43022	3.13132	4.12638	3.07917	3.78553								1132	1.01351
																	1132	7.29299	4.38631	3.79908	4.04269	3.22993	3.61163	3.01989	6.03485								1133	0.675676
																	1133	4.25619	4.8713	3.39278	3.46018	3.121	4.9009	3.36741	3.55464								1134	0.675676
																	1134	3.24139	3.06661	3.05096	5.52555	3.27641	3.49911	3.41211	3.13742								1135	0.675676
																	1135	3.08718	3.47246	3.39765	3.4102	3.3789	5.60223	3.8123	4.63704								1136	0.675676
																	1136	4.3217	3.51792	5.52511	3.19959	3.06888	3.88154	3.12097	5.4796								1137	2.02703
																	1137	3.43595	3.41871	6.18964	3.73212	4.28514	4.09213	3.51985	3.15651								1138	0.337838
																	1138	3.32675	3.54767	3.00328	3.08744	3.24226	3.91637	3.06878	3.38368								1139	0.337838
																	1139	3.04747	3.76021	3.46289	3.27243	3.06353	3.34919	3.34134	3.26339								1140	1.68919
																	1140	3.85294	3.10352	3.5374	3.17949	3.01268	6.77347	3.57936	3.1225								1141	-0.337838
																	1141	3.15317	3.68773	3.89776	3.00433	3.63367	3.22415	10.3291	3.71912
																	1142	3.67789	3.30823	4.00206	3.4181	5.03961	6.01437	3.34508	3.38847
																	1143	3.32102	3.04509	4.1621	3.60855	3.49364	3.90851	4.26498	6.76941
																	1144	3.93925	3.50673	4.18291	3.28576	3.47448	3.79086	4.1342	3.26829
																	1145	3.17626	3.10481	3.12676	3.20045	3.79059	4.94425	3.89743	3.07509
																	1146	3.05303	3.64535	7.29082	3.96875	4.20886	3.30608	3.68057	4.31953
																	1147	3.42397	6.74129	3.18017	3.58897	3.7195	4.78867	3.16037	9.21363
																	1148	3.00297	4.09729	6.16946	3.09697	3.27902	3.17523	3.58953	4.90255
																	1149	3.75106	4.09947	4.65495	6.63101	3.3871	3.18323	3.44013	7.24194
																	1150	3.84228	3.25781	4.42015	4.32283	3.29089	3.25692	3.59527	5.59479
																	1151	3.06249	3.07297	8.1744	3.28124	3.62853	3.33374	3.5246	6.62434
																	1152	3.00335	3.31561	4.22701	4.87405	3.05377	3.27581	6.50137	3.69753
																	1153	6.16621	6.14712	8.52449	3.62045	3.05485	3.29421	6.13156	3.21672
																	1154	5.26831	4.13517	8.09547	3.41258	4.33044	3.43327	3.64435	3.24793
																	1155	12.9183	4.32963	3.27027	3.23567	5.25694	6.40063	3.00341	4.04954
																	1156	8.09505	3.57724	4.26298	5.68961	4.06641	3.0663	5.46211	3.97272
																	1157	8.10721	3.13882	4.22836	5.35361	4.02566	6.04385	3.02408	3.0906
																	1158	5.28589	3.28387	8.45984	3.17662	3.38584	3.58491	7.44229	3.83003
																	1159	3.02118	3.46454	7.25725	3.22797	3.88347	3.44237	3.14312	5.83898
																	1160	3.25147	3.9591	5.62025	3.14544	3.82213	3.1527	3.56627	3.3994
																	1161	3.8421	3.03676	7.22165	4.14812	3.07996	4.75506	3.32085	3.21684
																	1162	5.54914	3.12249	3.42532	3.33681	4.29506	3.12987	3.25668	3.4897
																	1163	4.38501	4.2435	3.18641	3.55238	3.42467	3.52038	8.19374	4.0036
																	1164	3.00578	3.44307	3.97964	4.0389	3.91669	4.29702	3.00243	4.05001
																	1165	3.97293	3.05255	4.14396	3.39871	3.70961	3.64541	3.14165	3.01542
																	1166	3.68994	3.15888	3.11242	3.07885	3.37139	3.42152	3.21218	4.74671
																	1167	4.26981	3.90169	5.68315	4.41693	3.93672	3.32957	3.18	5.29432
																	1168	3.56915	3.67966	3.29588	6.63469	3.03438	5.23973	3.00366	3.26918
																	1169	3.37056	3.93073	3.20812	3.01834	4.78277	3.01664	3.007	3.78813
																	1170	4.08591	3.14267	7.19883	7.08101	4.77465	3.98246	6.8291	5.63105
																	1171	3.06448	3.05074	6.55592	3.0849	4.41792	3.77337	3.39257	3.51859
																	1172	3.95507	3.13303	9.18761	3.65758	3.88535	3.24366	3.82949	4.71485
																	1173	5.98857	3.0638	5.30103	3.73606	3.06228	3.76956	8.59344	3.48544
																	1174	10.9841	3.53296	4.93815	4.26262	4.17692	3.34728	4.37441	3.02398
																	1175	5.34748	3.39845	4.41617	3.121	3.27523	3.26966	3.82295	4.06748
																	1176	3.53801	3.23696	3.51515	3.4303	3.16992	3.06691	3.05325	3.1602
																	1177	3.91416	3.02758	4.48468	3.01403	4.08173	3.01128	4.23212	3.78641
																	1178	3.35291	3.59657	3.24079	5.09869	3.12771	4.20652	3.10144	3.22123
																	1179	3.21141	3.58045	3.48201	5.33258	3.19517	5.13928	3.04146	5.44447
																	1180	3.07605	3.93852	6.70672	5.61584	3.73865	3.7931	3.00421	3.72891
																	1181	7.0043	4.15092	3.15421	4.19505	3.92811	3.29607	3.557	3.40446
																	1182	3.0161	3.43209	5.15385	3.6019	3.92725	5.65559	3.30651	3.86561
																	1183	3.31214	3.37863	6.58844	3.014	3.62388	3.24883	3.01093	4.07197
																	1184	4.64853	3.18299	4.7291	4.06493	3.43836	3.09437	3.13772	3.07294
																	1185	6.40762	3.53411	6.85101	5.44244	3.06487	3.98493	4.87985	4.45916
																	1186	5.80454	3.09146	8.88512	4.17775	4.31315	3.17209	13.537	3.38408
																	1187	11.2727	3.02568	3.46131	3.48938	3.02764	3.94369	3.057	3.64391
																	1188	8.78135	3.24832	4.70942	5.21957	3.40184	4.38307	3.11027	3.98425
																	1189	6.19658	3.63028	5.17888	4.03368	3.39105	3.11663	4.09448	6.43415
																	1190	3.2532	3.60701	5.17892	4.52415	3.29466	4.67707	3.86347	3.94315
																	1191	3.76492	3.16349	4.47404	3.43277	3.54307	4.0677	3.35283	5.09197
																	1192	3.50584	3.29762	3.79165	3.24356	3.77547	3.18386	4.09454	6.29905
																	1193	3.13288	3.93419	3.22493	5.99297	4.88459	4.20123	3.70927	5.72908
																	1194	3.65765	3.9519	6.16552	5.11583	3.37042	4.78439	3.39622	4.93617
																	1195	3.20891	4.32629	7.54199	4.25464	3.2223	3.33839	3.14769	5.72118
																	1196	3.07164	3.25442	5.81228	3.0059	3.1242	3.22336	3.13429	3.55777
																	1197	3.39625	3.44262	5.29085	3.4215	3.78536	3.35862	3.5751	3.38527
																	1198	3.67007	3.8982	9.21458	3.69117	5.09008	3.96117	5.24548	3.53508
																	1199	5.80042	3.07535	3.42455	3.41941	3.91486	3.07144	3.48732	4.25691
																	1200	3.1515	6.58928	3.17461	3.28034	3.29147	3.19598	3.65752	4.66081
																	1201	3.9215	3.68865	3.71653	3.00607	3.10866	3.26875	3.04493	3.91056
																	1202	15.6256	3.6623	3.19012	3.65383	3.86046	4.88013	3.20375	3.00508
																	1203	3.0791	3.15291	3.41858	3.5166	3.47126	5.44501	3.27981	3.21848
																	1204	5.08047	3.32379	6.89592	3.7304	3.01803	6.33518	3.09523	3.0086
																	1205	6.59506	3.09703	3.13304	3.12161	3.16204	5.1854	6.13149	5.14893
																	1206	5.67847	3.67533	4.28665	4.50509	3.09138	3.82878	3.64201	3.99375
																	1207	5.07529	3.14229	3.12627	4.24733	3.27503	3.27598	3.57069	4.68927
																	1208	13.9864	5.35835	3.60515	3.92885	3.11873	3.34508	3.80631	3.26475
																	1209	3.93832	4.60666	3.10409	4.04883	3.04516	3.81061	4.36665	3.01768
																	1210	3.3373	3.32455	3.01152	3.54783	3.42244	3.1548	3.20692	3.13488
																	1211	3.0662	3.14636	3.14096	4.54585	4.12382	3.02687	3.35652	6.01649
																	1212	4.0375	3.47635	3.11388	6.70287	7.82091	3.01237	4.35418	5.35152
																	1213	3.35867	3.98432	5.22499	3.23218	3.95707	3.03318	3.40322	3.12221
																	1214	4.08568	4.37676	3.64514	3.46334	3.64516	3.75534	3.85841	5.1733
																	1215	3.54856	3.54691	3.12889	7.10276	3.39332	3.54074	4.29689	4.76559
																	1216	3.15475	3.21765	3.09212	4.55182	3.11338	3.08601	3.84211	3.61074
																	1217	3.29825	3.58526	7.3217	3.163	3.01062	3.05234	3.15454	3.08351
																	1218	3.12134	3.26993	3.36141	8.47023	4.47928	3.19943	3.1534	4.4576
																	1219	3.10769	3.57954	7.11174	3.26904	3.06487	5.77861	4.55094	5.14914
																	1220	20.6542	4.41301	3.60079	3.18668	3.10704	5.45022	4.08022	5.86052
																	1221	4.14226	3.711	5.49089	3.10473	4.56127	3.30564	3.71451	7.82516
																	1222	3.96676	3.16801	3.9803	3.54362	3.80401	3.72181	3.1331	4.03247
																	1223	4.94537	3.19498	5.42735	4.12689	3.23646	3.7621	3.25458	4.20179
																	1224	5.63845	5.03675	4.61399	3.31149	3.11698	3.53667	3.50745	4.35106
																	1225	3.309	4.08883	3.17168	5.88404	4.54716	4.56009	3.18768	3.44651
																	1226	5.21121	3.05725	3.14584	3.68661	3.48533	3.24802	3.1572	4.92978
																	1227	3.08317	3.04108	3.92098	3.10509	3.48176	3.00508	3.00089	4.27961
																	1228	6.58388	3.20692	4.53838	3.50284	3.45258	3.88168	3.01918	3.78974
																	1229	3.76719	3.1041	3.42546	3.17839	3.18614	7.66182	3.92275	3.51309
																	1230	10.122	3.42118	3.56288	4.83282	3.42783	3.69755	3.89845	3.59745
																	1231	10.5103	3.01262	5.38832	3.43981	3.30692	3.05053	3.07858	3.01632
																	1232	3.00168	3.72745	3.2173	4.76738	3.66732	5.12943	3.05101	3.40025
																	1233	3.16729	3.07427	6.09842	3.66682	3.01429	5.24141	3.20951	3.26168
																	1234	3.87703	3.64136	4.10832	4.47912	3.20754	3.79636	3.49278	3.30366
																	1235	3.60485	4.00056	3.22138	5.07735	3.19305	4.18889	3.64502	3.38483
																	1236	3.46872	3.32069	4.51873	3.87831	3.36545	4.66606	6.63288	3.21177
																	1237	3.1886	3.8881	6.31716	6.58974	3.18544	4.5201	3.26087	5.63969
																	1238	3.25052	4.47692	8.44552	5.23202	3.34457	4.15117	3.05763	3.8346
																	1239	3.03545	3.74879	6.30093	3.02108	3.02371	3.57149	3.34306	3.3717
																	1240	3.12348	3.23157	3.32325	3.02473	3.49858	4.64876	3.53195	5.85688
																	1241	3.71021	3.37786	5.55612	3.79024	4.05503	3.84899	3.89845	3.41151
																	1242	4.2688	3.35773	7.87023	3.12123	3.05663	4.18872	3.27259	3.44355
																	1243	5.68874	3.16951	5.53076	3.31832	4.83034	3.48382	5.95541	3.44995
																	1244	3.49946	4.51971	7.419	3.18764	3.99128	3.02449	3.74074	6.13072
																	1245	6.17779	4.26231	3.74116	3.12605	3.35993	3.33192	3.16805	4.00897
																	1246	7.99812	3.28778	4.35528	3.49259	3.22807	5.89064	3.63203	3.05427
																	1247	8.15272	3.11969	3.33999	4.56081	3.95686	3.06722	3.13966	4.9853
																	1248	8.58433	4.20503	3.09712	3.18994	4.6568	3.47164	3.59548	3.73947
																	1249	4.18189	3.36433	4.25999	3.74082	3.64755	3.15573	3.66153	3.83817
																	1250	4.47124	3.0262	3.239	3.62529	3.00767	3.76169	3.29091	4.38377
																	1251	7.01432	4.15897	3.00237	3.77125	3.67912	4.22039	4.55052	3.31879
																	1252	5.09447	5.10617	3.82152	5.68234	3.32685	3.71942	3.14868	5.47326
																	1253	4.00556	3.19174	3.07644	3.06432	3.56864	5.27239	3.68641	5.69684
																	1254	3.88077	3.34113	5.35327	3.02874	4.09125	4.055	3.11112	5.47024
																	1255	13.8083	4.65667	3.06252	3.60325	3.01303	5.2255	3.57484	3.93225
																	1256	12.0214	4.49218	10.1595	5.27728	4.12706	5.21893	3.91886	3.01281
																	1257	3.08743	3.96959	3.91663	4.38364	3.31785	3.21117	3.3169	3.09447
																	1258	3.16069	4.1361	4.75673	6.16868	4.66355	5.71893	3.64526	3.16798
																	1259	3.14262	5.60146	6.16573	7.75817	3.51999	6.52882	3.72175	5.0541
																	1260	3.03923	3.54326	3.10838	7.48478	3.21803	3.519	3.12859	3.04772
																	1261	3.20712	3.14933	5.26185	4.69291	4.12075	3.9985	3.02381	3.92896
																	1262	3.36543	3.09392	9.17734	3.76415	3.21672	4.66829	5.23045	3.42613
																	1263	3.90099	3.20361	4.77862	4.23039	3.32689	3.30423	4.36417	3.98735
																	1264	3.05449	3.74269	7.16501	4.39506	3.98299	6.84903	3.32674	3.126
																	1265	3.23847	3.23283	3.91791	4.57647	3.79259	3.33555	3.51786	4.00753
																	1266	3.05243	3.62601	3.5713	6.1214	3.19863	3.26403	3.33813	6.23456
																	1267	3.35484	4.19932	6.56436	5.56922	5.49659	3.33758	4.61078	6.57191
																	1268	12.9134	3.63243	5.07903	3.05544	3.18171	3.69693	7.12303	6.85608
																	1269	6.61323	6.1158	4.76004	5.56618	3.21741	3.52819	4.71497	3.39604
																	1270	16.4316	3.15794	8.2639	3.69992	4.99514	3.40809	3.03286	5.10174
																	1271	7.09747	3.48292	6.0185	4.09068	3.0756	3.80173	3.101	3.01026
																	1272	11.9984	3.59032	3.72724	6.91771	3.48838	3.95807	14.5614	3.28369
																	1273	3.23509	3.06701	5.49338	5.00164	6.73881	3.01757	3.35041	3.51028
																	1274	11.1602	5.44305	6.99574	3.71987	5.66363	3.70554	3.01772	4.94972
																	1275	14.5893	3.85555	6.57913	4.99573	3.141	4.06106	3.39638	4.09315
																	1276	4.42082	3.50751	5.03764	3.1846	6.22592	3.78398	3.1726	3.12174
																	1277	7.37155	3.00576	5.81847	3.82336	5.13329	3.25255	3.3615	4.16392
																	1278	3.47275	3.1127	8.1369	4.72253	3.20019	3.53483	3.12283	4.07844
																	1279	3.15956	4.65687	7.04104	4.14504	3.60844	3.88089	3.08356	3.26523
																	1280	3.25719	3.37068	5.67898	4.40243	3.01942	3.60384	3.70692	3.05917
																	1281	3.76169	3.28799	6.1421	3.38893	3.31283	3.05733	3.41156	5.16073
																	1282	8.35684	4.33285	8.84803	5.05665	3.36622	3.69512	3.28664	3.96788
																	1283	7.4628	3.71637	3.77605	5.51535	3.55233	3.51375	3.43851	3.05043
																	1284	12.4282	5.06618	4.04405	5.50212	4.12514	3.53772	3.32662	3.03499
																	1285	5.9344	4.83542	3.5396	3.46217	3.15685	3.34242	6.73411	8.24
																	1286	3.31191	8.25916	3.01365	3.26269	3.12674	3.74505	3.51603	3.99291
																	1287	3.68844	6.63451	3.40259	3.69972	3.02625	3.00255	3.43074	4.08353
																	1288	3.03395	8.73659	3.40185	3.44396	3.19147	3.3813	3.89542	3.12599
																	1289	9.56313	7.9597	7.44759	3.07034	3.64554	3.70148	3.16364	3.42127
																	1290	11.0552	5.50811	4.06897	3.58104	5.0185	4.2526	3.25583	4.16696
																	1291	3.37228	4.16491	3.73949	3.64775	3.19399	3.95211	4.15971	4.0042
																	1292	3.53469	3.6213	5.38441	8.62492	3.4305	3.89552	3.69109	4.24586
																	1293	3.35477	5.57847	7.75132	3.28858	3.13703	3.20063	3.83208	3.16908
																	1294	5.27458	3.77504	7.36375	7.09307	3.33488	4.96324	3.25901	4.65039
																	1295	3.29101	3.60095	5.91834	6.53706	3.13698	4.71952	3.0319	3.01342
																	1296	3.31131	3.7832	5.67071	6.44972	3.29759	3.33299	3.18947	3.01594
																	1297	3.11453	4.14614	7.32334	3.82431	3.6095	3.32669	3.04661	3.56755
																	1298	4.94027	3.36846	6.00102	4.08084	3.25656	3.36762	3.52689	3.15323
																	1299	3.24316	3.74374	3.2429	7.13893	3.32945	4.20049	4.68507	6.46513
																	1300	5.60612	3.97665	4.07625	3.16477	3.29108	4.02065	9.65693	5.21701
																	1301	13.3732	3.28509	3.03181	3.2239	4.18127	3.93499	3.37229	3.0551
																	1302	3.07192	3.09019	5.9793	3.01906	4.09331	3.89173	8.36066	6.04304
																	1303	3.20226	5.6682	3.32336	3.76243	3.32224	4.81583	3.19963	3.83729
																	1304	3.72081	3.16238	3.01478	4.18037	3.96348	4.16466	3.21071	4.6669
																	1305	3.4439	3.17138	3.63573	5.1204	3.86303	3.8757	3.3142	3.69014
																	1306	7.72089	3.04828	4.97532	5.59157	3.77152	3.58381	3.13286	3.24296
																	1307	3.60107	3.15907	3.45118	3.57751	3.43431	4.37824	3.22023	3.01107
																	1308	3.32591	5.19411	4.27334	3.08923	4.55323	3.17232	4.75765	3.19601
																	1309	3.51441	3.34224	3.27347	5.40979	3.18548	4.50403	3.58197	3.22864
																	1310	3.39668	3.56826	3.50718	3.17366	3.1574	3.16657	3.0395	3.63638
																	1311	4.50589	5.02475	8.40132	3.54832	3.04015	3.00359	3.36939	3.48616
																	1312	17.5117	4.25527	3.27549	3.30573	3.43942	3.03322	3.434	5.93005
																	1313	3.01175	3.35084	3.13546	3.58014	3.90844	3.06373	4.00362	4.26813
																	1314	4.32772	3.88492	3.10901	4.41695	3.13407	3.95579	4.278	3.32778
																	1315	4.00851	3.0589	3.32413	4.82732	3.42153	4.18667	3.0876	4.74879
																	1316	4.21184	5.81662	3.51542	3.03274	3.09176	3.73467	3.75241	3.13824
																	1317	3.07153	4.41625	3.05008	3.55793	4.82326	3.11246	3.89622	3.51169
																	1318	3.67818	3.92046	5.31541	4.08537	3.28348	3.2055	4.16137	3.81828
																	1319	5.24215	3.21573	3.54281	6.8735	3.12649	3.18358	3.15352	4.49355
																	1320	3.97309	4.92279	3.12639	3.1564	3.12272	3.67864	3.61939	4.57714
																	1321	11.7755	4.43276	3.81156	6.12167	3.13731	3.96172	3.25748	3.29817
																	1322	3.11837	4.72746	3.11478	6.22195	3.103	3.22739	5.95067	3.24689
																	1323	3.99449	3.61506	3.53776	3.82826	3.49337	3.47658	3.16132	3.28743
																	1324	8.25001	3.98968	3.78154	4.06342	3.04678	5.75647	3.65117	3.43375
																	1325	3.78194	3.45565	3.80331	3.16145	3.32405	3.76721	3.04669	3.10005
																	1326	3.28882	5.18811	3.00498	3.40184	3.19883	4.74777	3.16108	3.67908
																	1327	8.56438	3.05627	3.01768	4.8226	3.18329	3.32742	3.23244	7.41342
																	1328	3.43324	4.96799	3.43112	3.86019	3.37438	3.9064	3.13666	3.49439
																	1329	3.01137	3.3449	3.07356	4.29137	3.9115	3.47854	3.78016	7.05518
																	1330	3.66402	3.21961	4.1859	3.85352	3.11275	3.10733	3.03347	3.72353
																	1331	3.17347	3.04876	3.73219	4.03097	3.42738	4.75406	3.14952	3.79914
																	1332	3.00465	6.94305	3.00093	3.02359	3.02063	3.67383	3.01906	4.06287
																	1333	3.09372	4.32607	3.22319	7.42438	3.60589	3.25756	3.12761	3.06092
																	1334	3.09728	3.78781	3.08529	4.97674	4.1644	3.0656	3.68432	3.23756
																	1335	3.95196	6.1295	3.1071	3.45633	3.54796	4.21856	3.96052	6.2408
																	1336	3.44489	4.89692	3.18095	4.38313	3.20808	3.31648	11.7982	3.59842
																	1337	3.01327	4.00036	3.00245	3.14402	3.30279	3.41122	3.99542	5.60313
																	1338	3.18801	6.79861	3.82603	4.65033	3.68145	3.80302	4.2039	3.46413
																	1339	4.36246	5.1939	3.16059	5.88737	3.31792	3.22474	3.40048	3.1807
																	1340	4.30648	3.22793	3.7873	4.48969	3.55053	3.83668	5.09176	3.41089
																	1341	3.95929	3.49625	4.74256	3.06942	3.30341	3.4997	4.61217	3.441
																	1342	4.06257	3.78011	3.42148	3.25233	3.66083	3.40871	3.34918	3.42789
																	1343	11.2448	4.03038	3.03626	5.56658	3.0377	3.30388	3.04869	4.2952
																	1344	9.14117	3.43857	3.12553	4.22085	3.67933	3.91851	3.40196	3.84469
																	1345	6.79498	3.56597	3.3634	3.64236	3.72074	3.22063	3.37409	4.52708
																	1346	8.1363	3.10771	3.15896	7.89828	3.63433	4.24693	3.50105	4.412
																	1347	3.47902	3.18677	3.12432	3.74037	4.89982	3.67329	6.42426	3.5607
																	1348	3.18118	3.08643	4.42612	3.48497	5.91941	5.46385	4.58849	4.0081
																	1349	3.07664	3.95241	3.18963	3.14086	4.54097	3.40273	3.27637	3.18878
																	1350	4.23336	3.59245	3.53793	6.58817	3.79193	3.92628	3.18061	5.17078
																	1351	3.1802	3.66118	3.17347	4.32386	3.12615	3.68196	3.76744	3.44509
																	1352	3.12595	3.87567	3.31017	5.12145	3.59072	3.76923	3.34687	3.31061
																	1353	3.34687	3.41739	3.31105	3.15831	3.01915	3.12076	3.94448	5.0558
																	1354	4.05191	3.72406	4.0175	3.08609	4.26372	3.06204	5.27926	3.23332
																	1355	3.95245	3.05012	3.03191	3.16058	3.2598	4.36294	3.20185	5.54166
																	1356	3.13034	6.02431	3.47805	3.92244	5.31761	4.56051	3.28568	3.79592
																	1357	3.0746	3.17655	3.00354	3.61847	3.34759	4.80986	3.19155	3.16026
																	1358	3.44422	3.0414	3.08502	5.25721	4.16579	3.93639	4.41801	5.52705
																	1359	6.82881	4.89504	3.0642	3.3942	3.57421	4.01266	3.19629	4.53827
																	1360	4.6832	3.16894	3.5731	3.1099	3.03082	5.0781	3.30119	3.59608
																	1361	4.92195	3.36436	3.21947	3.5394	3.48075	4.4489	3.26016	3.51197
																	1362	3.6645	3.01261	3.56152	3.55162	3.17733	3.48789	3.32597	3.1378
																	1363	3.01182	8.71874	3.77671	3.30226	3.14216	3.03071	3.0212	3.69655
																	1364	7.99729	3.64327	3.06121	3.95094	3.36187	4.56048	3.27215	3.52704
																	1365	7.63481	6.56219	3.0644	3.56721	3.79606	4.3886	4.51455	3.26074
																	1366	10.1718	8.0761	3.16589	3.6661	3.16794	3.55342	4.12687	4.12566
																	1367	8.20006	3.32337	3.25653	4.08803	3.51188	3.01443	3.44378	3.24462
																	1368	5.86847	3.74889	3.08998	5.21126	3.24303	4.04664	3.05955	4.06219
																	1369	4.01388	6.36436	3.38924	3.19247	3.60186	3.9778	3.43009	4.59596
																	1370	3.36919	5.58937	3.06962	6.21376	3.22705	3.31197	3.09286	6.62683
																	1371	5.29364	4.06993	3.46574	3.88274	3.04318	4.65477	3.05846	4.43624
																	1372	3.13548	5.23317	3.53276	3.83	3.45881	3.30034	4.14358	3.20281
																	1373	4.39825	4.40655	3.53456	5.87886	3.01637	3.65294	3.06968	3.17818
																	1374	3.51712	4.09953	3.18024	4.47461	4.32174	3.18694	3.02861	4.11321
																	1375	3.56396	4.49624	3.14761	4.46861	3.85586	5.17174	3.13022	3.73737
																	1376	3.1862	3.51116	3.25923	3.638	6.81334	3.79322	3.04141	3.38783
																	1377	3.51538	3.69965	4.02808	3.03714	3.44094	3.10243	4.0405	3.93029
																	1378	3.46111	3.97825	3.75728	3.74096	3.27748	5.60691	3.41966	4.32812
																	1379	3.08129	3.82207	4.12078	3.61671	3.63934	3.16142	3.08838	3.91653
																	1380	3.6312	4.28774	3.96902	3.82111	3.5338	3.11522	3.94776	4.21328
																	1381	3.52132	3.51997	3.69997	3.78801	3.04322	3.20089	4.7006	4.02027
																	1382	5.20087	5.75474	3.03743	3.28818	3.49549	3.3257	3.95545	3.58216
																	1383	4.33436	3.56193	3.37211	3.47056	3.85186	3.32028	3.08136	3.84202
																	1384	3.30089	6.28445	5.62365	4.04299	3.13577	3.08175	4.15364	3.46581
																	1385	4.14389	6.01275	5.19197	3.93242	3.26327	4.25075	3.0822	3.44294
																	1386	3.76114	4.92729	3.32473	4.63099	3.02376	3.8967	4.48726	3.33487
																	1387	3.19064	6.45348	3.02881	3.58551	4.20171	3.02446	3.96199	3.31359
																	1388	3.43096	5.40396	3.17468	3.6345	3.04311	3.30034	3.10865	3.7539
																	1389	5.59907	3.68994	4.98066	5.88943	4.06163	3.88123	3.84816	4.78075
																	1390	6.38672	3.994	3.38203	5.81964	5.46144	3.83529	3.29434	3.27456
																	1391	4.32514	8.51842	4.33349	3.65088	4.32202	3.2995	3.17212	5.02274
																	1392	3.5242	4.0843	3.52277	5.41689	6.40616	4.89429	3.07067	4.10098
																	1393	3.93084	7.08161	3.07433	3.53657	3.27908	3.79851	3.00603	3.93263
																	1394	3.19858	4.55904	4.29841	3.26191	3.44487	3.72231	3.06508	3.09001
																	1395	5.27329	3.4799	3.88089	4.48813	3.40274	5.56012	3.07421	4.64355
																	1396	6.63802	3.42612	3.64521	3.76566	3.55682	4.7935	3.78747	3.02981
																	1397	3.51881	3.00012	4.09561	3.4318	3.81984	3.20588	3.00066	3.25906
																	1398	4.19677	10.4119	3.01839	5.82287	3.11512	3.53525	3.39625	4.25818
																	1399	3.11481	5.72216	3.38385	3.75371	3.18463	3.24397	3.33476	4.42118
																	1400	3.44314	9.13203	3.10605	5.46253	3.63833	3.1429	3.54594	3.20231
																	1401	3.55044	6.86741	3.52394	5.55759	5.21215	5.12819	4.06261	4.66862
																	1402	4.10457	3.87576	5.29012	7.15809	4.4165	5.87488	3.7003	3.50348
																	1403	3.53041	5.44873	5.13031	4.04166	3.16288	3.74792	3.67586	3.18487
																	1404	3.95742	3.6145	3.35463	6.01254	4.31456	5.88078	3.21089	3.11459
																	1405	16.5598	3.44661	4.43213	10.1	4.06646	3.16311	3.05127	3.13551
																	1406	3.80506	3.2997	3.06415	5.863	3.19852	3.01003	3.22024	3.19504
																	1407	3.66425	3.92331	3.49055	3.52883	4.2987	3.68787	3.22583	3.66438
																	1408	3.6144	5.70608	3.69015	3.07697	3.42554	3.10731	4.6801	6.21388
																	1409	4.13369	3.55655	3.11472	3.35535	3.2921	4.47194	4.79897	3.78171
																	1410	4.98406	3.75426	4.50485	3.11705	3.14835	3.61811	3.484	3.99696
																	1411	3.32483	4.80284	3.65723	3.104	6.99678	3.2509	8.77636	5.61289
																	1412	3.76448	3.67335	3.33713	3.4177	4.36326	3.40458	4.76926	3.59028
																	1413	3.44878	4.73766	5.08147	3.21126	3.76976	5.98186	3.22485	3.93008
																	1414	3.38888	3.66031	3.87549	3.57208	4.60892	5.29722	3.56988	3.74894
																	1415	3.20525	4.84668	4.46054	3.4131	4.54026	4.2123	6.13785	3.23635
																	1416	3.22695	7.22399	3.02113	3.03726	3.53837	7.29794	3.09633	6.28783
																	1417	3.16824	4.18051	3.66584	3.64348	3.47185	3.38582	3.03232	3.19518
																	1418	4.3037	4.46468	3.46914	3.68655	11.509	3.41803	3.65961	3.13681
																	1419	3.19852	6.78223	3.45098	3.44921	3.3126	3.13985	3.14919	3.02366
																	1420	3.09797	3.55897	3.32428	3.08796	7.21335	3.01126	3.73498	4.48404
																	1421	4.10427	3.18405	4.20585	4.10748	4.07817	3.00062	3.47082	5.18646
																	1422	3.30268	3.45125	4.25217	4.88679	4.19022	3.41046	4.79826	3.97222
																	1423	3.3447	5.27183	3.01568	3.39296	4.51199	3.15356	3.25334	3.8659
																	1424	3.51505	6.85485	4.66887	3.20773	3.2612	3.48815	3.09936	3.19746
																	1425	4.63355	4.17778	4.90889	3.48542	3.57302	3.91829	5.32375	3.18634
																	1426	4.02172	5.56406	3.07916	3.20762	3.70812	3.27384	3.77147	3.13808
																	1427	6.01887	3.252	3.54216	4.68679	3.05689	4.29161	3.54443	3.20033
																	1428	3.13308	3.25305	3.12166	3.52421	6.37661	4.02259	3.02614	3.77567
																	1429	3.00006	3.86184	3.76415	4.8177	5.82275	3.2717	3.15192	3.14447
																	1430	3.41748	4.15082	3.24973	4.7563	5.41398	3.17526	3.28289	3.88686
																	1431	4.37842	3.08099	3.24574	3.75639	7.55794	4.43353	4.27412	3.41762
																	1432	4.74075	4.47769	3.2748	3.64252	3.87013	5.13572	3.28978	3.51845
																	1433	9.76	3.97643	3.78447	3.41061	3.29262	3.50592	3.25787	3.6284
																	1434	3.64942	5.10658	3.01673	3.20703	5.05214	3.18653	3.19692	3.06955
																	1435	4.96282	4.78096	3.46072	4.57072	3.94512	3.69992	3.38528	3.58934
																	1436	5.91016	3.04291	4.55495	4.09485	3.03882	4.16538	3.13829	3.10158
																	1437	3.20242	3.98258	3.57753	3.77904	4.27003	3.41882	3.26314	3.72644
																	1438	3.62105	3.07638	5.10045	6.34193	3.1684	3.00924	3.06676	3.42822
																	1439	3.18555	3.12912	4.16128	8.52334	4.05492	3.32328	3.32438	4.23035
																	1440	3.61862	4.70305	3.93458	5.37736	3.29389	3.26221	3.34663	4.95926
																	1441	6.26523	4.0964	3.07837	5.76131	4.08778	3.82057	3.45105	3.58449
																	1442	3.54382	3.45674	3.78579	4.4726	3.534	3.08055	4.05553	3.75522
																	1443	3.57755	5.409	4.0208	4.92383	10.4435	4.21236	3.27094	3.48519
																	1444	4.0935	4.18939	3.18502	3.06684	3.10325	3.22941	3.1873	3.41768
																	1445	3.4125	3.80192	6.25916	4.10898	3.53555	3.02466	3.83673	3.96436
																	1446	5.41269	4.02223	3.76447	3.15956	3.40729	3.65989	6.97945	5.80569
																	1447	3.00523	5.40016	3.3027	4.46154	3.34314	3.66047	3.17855	6.06724
																	1448	3.2636	5.25482	3.20689	4.19289	3.04936	3.3091	6.95375	3.96622
																	1449	6.29552	3.57829	3.74502	3.96295	6.94566	3.03782	4.11446	8.01953
																	1450	5.03803	4.28191	3.65491	3.38003	7.31196	3.14575	3.92764	5.85603
																	1451	3.07107	5.50478	3.54166	3.24503	3.80282	4.02318	3.39526	3.12287
																	1452	4.00709	3.95666	3.07173	3.07564	3.50395	5.34202	3.07951	4.54605
																	1453	4.01622	6.5153	4.27532	3.12403	3.21933	3.04084	3.41508	4.10354
																	1454	5.38261	4.80832	3.04733	3.0086	3.31706	4.3628	3.885	5.6634
																	1455	3.25905	4.37427	3.04774	3.06584	6.64635	4.52682	3.65166	3.1559
																	1456	3.38496	4.473	3.08651	3.78654	7.25267	3.94542	4.64639	5.82659
																	1457	11.4131	3.08447	3.26854	3.58985	3.39363	3.21038	3.01925	5.34638
																	1458	3.62473	4.20693	3.32533	5.70849	3.28833	3.26273	3.10933	4.8885
																	1459	3.32879	3.41633	4.13757	3.19623	3.22965	3.42375	3.65853	3.11402
																	1460	3.1278	3.01263	3.07575	3.48826	3.14677	3.66362	3.00902	3.16076
																	1461	3.69927	3.71858	4.53984	3.51002	3.56369	3.24355	4.58858	3.11589
																	1462	3.71986	3.22267	3.64005	4.17241	3.0554	3.82988	3.08724	3.58516
																	1463	3.79128	3.38306	3.25469	3.00867	3.52763	4.03136	3.80771	3.33437
																	1464	3.04756	4.15761	3.13878	3.74063	3.18861	3.53356	3.00702	3.03093
																	1465	3.22331	4.38918	3.34943	3.43217	3.52032	4.44636	3.11302	4.07041
																	1466	3.47745	4.12438	3.35678	3.86925	3.73939	3.78696	3.13348	3.10032
																	1467	3.09137	3.62589	3.89034	3.23665	3.14802	3.37568	4.20547	3.1172
																	1468	3.2499	3.00852	3.24767	4.5601	3.64552	3.49299	3.34771	3.26768
																	1469	3.19615	3.54571	3.65548	3.21888	3.43377	3.06026	3.48594	3.25417
																	1470	3.45362	3.7147	3.41049	3.16506	3.14057	3.32116	3.13568	3.62084
																	1471	3.12155	3.64334	3.04701	3.89047	3.06749	3.67473	7.74498	4.20092
																	1472	3.32202	3.11835	5.91068	5.83132	3.13181	4.22652	3.11932	3.75114
																	1473	3.51142	3.82688	3.36354	3.80229	3.06193	3.23911	5.16224	5.35552
																	1474	3.42303	3.36688	5.54071	3.80201	3.52208	3.9218	3.23384	3.89611
																	1475	3.12187	5.80094	3.03031	4.689	4.061	3.35558	3.33721	4.24299
																	1476	3.53408	3.6447	3.6538	3.84699	3.06424	3.06971	3.151	3.10476
																	1477	3.21071	3.63959	3.2078	3.30165	3.367	3.95697	3.04309	3.85608
																	1478	3.01632	4.22261	3.31344	5.30482	5.14848	4.39236	3.16697	3.136
																	1479	3.35908	5.56132	4.57728	5.57405	3.2311	4.39597	3.99031	4.03634
																	1480	3.59053	5.15959	3.09535	6.42774	4.33429	3.42582	3.62065	4.57881
																	1481	3.51021	3.57526	3.77339	6.6055	3.50483	5.43832	3.48678	5.00938
																	1482	3.67526	6.6292	4.38401	4.99681	3.10808	3.24597	3.35826	3.34925
																	1483	3.1267	3.33535	3.00697	4.96725	3.81955	4.62877	3.20518	5.90749
																	1484	3.31705	3.44711	4.51736	5.74764	3.82591	3.78174	3.77925	4.48928
																	1485	6.13622	3.49225	3.19842	5.55859	3.63002	3.01897	3.22015	5.09369
																	1486	7.68663	3.79956	3.36465	3.30662	3.18455	5.05621	3.18974	4.17143
																	1487	3.89505	3.63216	3.31033	3.22693	3.24261	5.16722	3.18	3.70913
																	1488	5.90662	4.06266	3.61004	3.32949	3.1095	3.99262	3.06165	3.13801
																	1489	3.79069	3.01341	3.76769	3.18411	3.04737	3.6298	3.34123	3.20613
																	1490	3.05783	4.07754	3.27276	3.13382	3.01416	3.03142	7.10983	4.25335
																	1491	4.0743	4.55177	3.511	3.59508	3.025	3.84275	3.39523	3.32271
																	1492	3.374	3.64348	3.72444	3.08698	3.60498	3.52487	3.09874	5.40227
																	1493	3.30795	4.14752	3.345	5.22554	3.79725	4.17338	3.55821	3.98767
																	1494	7.28233	6.31675	3.56363	3.05756	3.23831	5.36495	3.42938	5.16873
																	1495	6.72639	4.24751	12.0041	8.02674	3.7743	3.49669	4.0145	4.3677
																	1496	8.81905	6.07326	3.20486	4.31184	3.45118	5.47452	3.28372	3.00047
																	1497	7.62895	6.21174	3.25413	3.22296	3.42704	3.87889	4.04821	3.3834
																	1498	9.07029	4.42609	7.83763	4.37063	3.26614	3.12359	3.61168	4.40226
																	1499	7.03572	3.96358	3.11247	3.05775	3.1133	3.98809	5.67556	3.50787
																	1500	8.89621	3.87492	3.24931	3.84866	3.18808	3.22127	3.6073	3.11023
																	1501	8.16081	3.35697	3.15178	4.39948	3.04605	3.00611	3.5634	3.58639
																	1502	3.54869	6.61848	4.95451	9.79842	3.08154	4.77849	3.01659	7.47777
																	1503	3.76497	3.57108	3.10907	7.5721	3.27231	3.82261	3.33627	4.29265
																	1504	8.90424	6.21621	3.07548	4.23616	3.64168	5.16397	3.44796	4.48327
																	1505	12.8203	7.55938	3.22626	7.1401	4.54872	3.00287	3.33706	4.16891
																	1506	10.708	9.05643	3.18969	4.11317	3.02348	3.13579	4.00193	3.30898
																	1507	9.87805	7.10946	3.02573	5.84224	5.71117	3.46248	4.56232	5.54085
																	1508	7.91946	4.14838	12.0588	5.394	3.92354	3.48604	4.19536	4.6552
																	1509	3.81851	3.26415	4.01976	5.49545	4.96322	3.0004	3.16452	4.03964
																	1510	5.54777	3.61725	3.706	5.08792	4.35717	4.99169	3.28891	4.69432
																	1511	11.3743	3.9715	3.40622	3.49886	7.82686	3.60247	3.75664	3.49188
																	1512	4.98103	4.3502	4.67685	5.29811	3.93651	3.78515	3.48154	3.4387
																	1513	5.68152	3.8054	3.19141	4.7822	3.46668	4.33408	3.91733	9.03841
																	1514	8.17227	6.43262	3.0857	4.45552	3.07804	4.87899	3.34188	3.63042
																	1515	5.66101	4.56696	4.2099	3.8766	3.04372	3.1712	3.29904	3.21021
																	1516	3.32004	4.57532	3.27268	3.77724	3.08097	3.04006	5.49732	6.43443
																	1517	13.488	9.07278	3.09862	3.66702	3.20858	3.09155	3.11926	3.04684
																	1518	5.22532	5.00286	5.45306	3.43273	3.17019	3.05776	3.72907	3.50697
																	1519	3.65007	7.61731	3.47854	4.6596	3.01042	3.17604	3.0741	3.02951
																	1520	8.4476	4.43081	5.00777	7.25129	3.46563	4.47772	3.63164	4.90697
																	1521	4.80736	3.80837	3.44346	6.3565	3.48423	5.40517	3.63009	3.60354
																	1522	4.76286	3.16625	3.25958	3.65265	9.97478	3.19221	4.29748	3.58899
																	1523	5.59675	4.51697	3.39974	5.08709	3.56004	5.45441	5.0268	4.01425
																	1524	3.11914	3.67595	3.25806	4.7959	3.27119	3.84046	3.56797	6.06557
																	1525	3.12233	4.40572	3.38676	5.82199	3.55807	3.2024	3.08814	3.48389
																	1526	19.0805	3.56966	3.03081	3.56847	3.38972	4.13775	3.89967	6.71056
																	1527	10.4644	4.77375	3.62384	4.97504	6.00273	4.23063	3.07531	4.13421
																	1528	6.86467	3.51152	3.06257	3.13293	3.18952	3.84309	3.6001	5.16152
																	1529	5.58353	3.77963	3.0955	4.90728	3.21376	3.32959	3.02536	4.24503
																	1530	10.2864	3.58127	3.02971	6.30074	3.55717	3.24239	3.06872	3.71922
																	1531	8.4549	4.57539	3.65373	3.54466	3.23602	4.18175	3.2695	3.52888
																	1532	8.87612	3.28507	3.53498	5.66768	3.31996	3.70508	3.08298	3.09273
																	1533	10.7695	4.83563	3.17368	3.22308	3.98439	3.36289	3.20582	3.40746
																	1534	3.52415	3.07762	3.4184	7.01967	3.30497	3.05481	3.05539	3.31692
																	1535	9.60263	3.09414	3.30905	3.00022	3.23113	3.01511	3.39001	4.02147
																	1536	6.46736	3.97254	3.37909	5.22136	3.43516	3.88016	3.28945	3.40508
																	1537	3.39038	3.17065	4.03726	3.75397	3.10247	3.74667	3.76106	3.36575
																	1538	7.50163	3.3517	3.06728	4.11518	3.74009	3.16088	4.00581	4.06793
																	1539	5.65693	3.23248	4.04904	3.29008	3.33081	3.69242	3.30054	4.02837
																	1540	12.0667	3.24169	3.29705	3.24517	3.31693	4.06102	4.00159	4.14583
																	1541	9.73532	6.71698	3.93728	3.5468	3.48776	3.26096	3.04642	3.35387
																	1542	7.56698	3.10731	3.43053	7.31334	3.30157	4.0072	3.62199	3.2562
																	1543	3.29927	4.55146	3.77993	3.56032	3.25688	6.12202	3.42514	3.75921
																	1544	7.05116	3.93335	8.08686	3.92339	4.85797	3.5798	4.05003	3.01199
																	1545	3.91888	3.41971	6.16172	3.37448	3.07418	3.00087	3.65521	4.04524
																	1546	7.07542	5.025	3.23543	3.23977	3.91144	4.65604	4.31776	3.87341
																	1547	8.46855	3.10672	3.50364	3.03367	3.71581	3.05867	3.10858	3.21016
																	1548	3.08012	4.93448	3.02133	3.03799	4.08334	3.04385	3.31139	5.49972
																	1549	5.7607	3.05226	3.0525	3.19769	3.0916	4.96446	3.66719	4.99507
																	1550	3.46441	4.32953	3.22041	5.12251	3.51513	3.92623	3.09892	5.53487
																	1551	3.46419	3.2164	3.28106	5.76666	3.00631	10.1054	3.07508	3.2982
																	1552	3.37464	3.54159	3.12417	5.96686	3.2804	3.29078	3.50141	4.63659
																	1553	3.42817	5.32435	3.0335	3.87917	3.09705	3.0875	3.06304	3.02494
																	1554	9.33287	3.35592	3.90899	4.60557	3.1557	3.21485	3.42829	3.41849
																	1555	6.32602	3.76831	3.07555	5.71225	3.31804	3.52437	3.39648	3.03373
																	1556	5.83694	3.77443	3.38384	5.12073	3.48846	3.10304	3.07318	4.40627
																	1557	6.86627	4.03751	9.71992	3.37553	3.30775	3.42597	3.82257	3.74954
																	1558	8.17082	3.93343	3.03655	4.10086	3.47345	3.47532	3.16789	3.37288
																	1559	5.25784	3.37547	3.48832	5.02439	4.04275	3.21615	3.95796	3.36833
																	1560	6.23495	3.46166	3.02118	4.56189	3.7342	6.63058	3.19867	3.1561
																	1561	6.02311	3.0294	3.39724	3.05903	4.21614	3.13262	3.17572	3.99319
																	1562	6.02682	4.68243	5.06234	3.42409	3.15893	5.15705	3.96496	4.30683
																	1563	10.1878	7.16927	3.50256	4.74008	3.38716	3.37502	3.06904	3.68973
																	1564	7.15738	4.16876	3.57062	3.1714	4.01429	3.80471	3.37879	3.73388
																	1565	6.03477	5.31743	4.35031	5.57557	3.11071	3.30769	3.11186	4.76431
																	1566	9.06526	6.18886	3.50139	3.8015	3.18867	3.17438	3.61494	4.06528
																	1567	9.86935	5.65462	5.43219	3.11077	3.47781	4.84048	3.86763	3.74196
																	1568	4.72206	4.18169	5.8028	4.26253	3.4808	3.64339	4.42944	4.04492
																	1569	3.65573	5.48308	3.85705	3.2683	3.31729	3.73817	3.53497	4.3054
																	1570	3.46549	3.32158	3.32219	3.19337	3.0936	4.37756	3.02104	5.1887
																	1571	3.40084	5.53039	3.06905	3.99265	3.43416	3.54978	3.04402	5.05741
																	1572	3.34628	5.64578	3.41663	4.24853	3.0568	5.15521	3.92427	3.85322
																	1573	6.81477	4.40444	3.33521	3.21006	3.35234	3.02508	3.27153	3.46978
																	1574	5.22473	5.95404	3.2583	3.95614	3.12923	3.02354	3.12168	3.54611
																	1575	4.92706	6.10556	3.07862	3.12398	8.60446	4.19447	3.40167	3.87248
																	1576	4.07166	7.94765	3.01437	6.88359	3.07456	3.78911	3.44275	3.1972
																	1577	4.53017	5.66193	5.03947	4.62026	3.80998	3.98119	3.29889	4.98065
																	1578	5.07739	3.89397	3.62567	3.77638	3.56384	3.18522	3.1277	4.51891
																	1579	7.42475	3.87074	3.04725	3.30047	3.81808	3.10101	3.73634	7.63025
																	1580	4.83893	3.00372	3.85176	3.40852	3.05238	4.10287	3.69642	5.13783
																	1581	5.49994	3.54842	3.56661	3.76614	3.19431	3.06318	3.52125	4.44206
																	1582	3.85031	3.26167	3.37406	7.11917	3.0582	6.32417	3.19619	3.13254
																	1583	3.33223	4.22753	4.65408	8.80058	3.0753	3.35317	3.52892	3.37088
																	1584	3.04718	3.77899	3.6087	3.36478	4.34354	3.38365	3.20211	3.31364
																	1585	4.49044	3.28583	4.8405	4.23672	3.14257	3.93973	3.18346	4.44511
																	1586	3.60322	3.39477	4.53035	6.79335	3.26476	3.08424	3.09422	8.72168
																	1587	13.9046	4.37825	6.63611	8.23105	3.45726	5.96808	3.09495	3.05954
																	1588	5.66349	4.84076	5.5044	3.99369	3.41469	3.67628	3.2841	3.71793
																	1589	9.77523	3.66436	3.40122	3.07525	4.52631	5.01898	3.24198	3.17921
																	1590	3.26763	3.41173	3.05577	6.59077	3.65412	3.73264	3.43868	3.19534
																	1591	5.38273	4.38093	3.69929	5.23803	3.52007	6.13063	3.17012	6.17134
																	1592	4.58009	3.46632	3.42764	4.26956	3.60336	4.89331	3.24652	4.30278
																	1593	3.70776	3.29681	6.97675	3.79504	3.28563	3.57216	3.13657	3.11973
																	1594	3.85409	3.14264	5.51188	3.93664	3.03565	3.16879	3.22483	3.56475
																	1595	4.02731	3.49262	3.3949	3.19727	4.29328	3.03916	3.16526	3.49861
																	1596	5.07811	3.68049	6.88268	3.00747	3.55836	3.92034	3.28835	3.34583
																	1597	3.39033	3.72157	3.39297	3.17646	11.1544	3.17929	3.61346	3.91944
																	1598	6.96258	5.53149	4.76903	4.19762	3.44311	3.03684	3.80726	3.05081
																	1599	3.22142	4.35557	3.20874	5.25259	3.22041	4.47477	3.72299	3.25564
																	1600	6.7962	3.41006	3.1568	3.09153	3.80473	3.01666	3.49396	3.12123
																	1601	12.0238	3.92126	4.10058	3.97574	4.86849	3.21883	3.83482	3.82602
																	1602	8.03882	3.98744	3.34656	3.84871	3.18735	3.42669	3.14178	5.11404
																	1603	5.60353	6.74302	3.15819	4.02943	3.07705	3.94072	3.00957	4.90211
																	1604	4.4694	4.1006	3.39768	4.19722	3.39554	3.33309	3.52048	3.12465
																	1605	3.67207	3.07042	3.595	3.49287	3.27095	3.14587	3.02861	3.68722
																	1606	5.95224	3.07343	3.3503	3.87702	3.07666	3.3663	3.0473	3.58709
																	1607	5.1163	3.01871	3.93288	3.94966	3.16734	5.21658	3.24151	3.56722
																	1608	4.84905	4.97102	3.61695	3.4084	4.13258	4.30704	3.08898	3.01694
																	1609	10.7111	3.74526	4.04583	3.12295	3.1562	3.30958	3.21222	3.47348
																	1610	17.1168	3.51427	3.4166	4.15195	3.14379	3.18194	3.50945	3.07358
																	1611	3.26304	4.89028	4.52548	3.17577	3.28995	3.63025	3.08282	3.69957
																	1612	4.96914	5.417	3.05935	4.7456	3.42141	3.08758	3.44288	5.12542
																	1613	3.69377	5.36371	3.91501	3.2827	3.26717	3.22661	5.0633	5.99194
																	1614	9.79998	7.15068	3.15651	6.57037	3.42748	4.22805	4.65859	3.66287
																	1615	3.20005	3.85438	3.73987	3.40665	3.0149	3.26136	3.20219	6.16189
																	1616	13.8364	5.06961	4.07373	6.35092	3.13076	3.00361	3.61312	5.14385
																	1617	6.60884	4.48904	4.28728	3.57679	3.31711	6.19933	4.85913	7.89147
																	1618	14.0609	3.2223	3.63502	3.10706	3.48138	3.32067	3.03917	3.39786
																	1619	9.87033	4.76718	6.73491	3.04229	3.02219	3.15268	3.49292	3.05636
																	1620	8.16346	4.04496	5.56213	5.38113	3.49098	4.51622	4.30372	5.89312
																	1621	6.83968	3.26878	3.12492	3.22908	3.41006	3.00659	3.15485	5.14792
																	1622	5.74582	4.96435	4.55334	5.37042	3.04158	4.35502	3.21479	3.10775
																	1623	6.83941	4.40657	4.80947	6.26405	3.50543	3.87619	3.17742	4.15381
																	1624	5.12519	3.15725	4.7232	5.92163	3.12619	4.3162	3.40846	3.34415
																	1625	5.98601	3.09437	3.04693	4.93579	3.24107	3.63391	3.48445	4.0092
																	1626	8.63854	3.59181	4.21115	3.23522	3.22123	3.86537	3.57665	3.56793
																	1627	7.09928	3.05474	3.15437	4.89033	4.0114	4.96878	3.21638	3.00274
																	1628	5.30917	5.53922	3.12382	3.1268	3.37986	4.39309	3.24707	3.99424
																	1629	5.76086	6.30218	3.92959	4.15075	3.32734	5.08705	3.24124	6.13458
																	1630	4.06959	4.3311	3.34509	3.16075	3.06333	3.03804	3.64484	3.23375
																	1631	4.53212	4.7385	3.21722	3.26738	3.40533	3.69927	3.99421	3.70245
																	1632	3.32254	5.7009	5.52309	3.01275	3.37302	3.28861	3.4373	3.15533
																	1633	3.55331	6.82322	3.1636	3.01327	3.35998	3.2368	3.05678	4.10943
																	1634	6.20932	4.87959	5.02328	3.22768	3.41604	3.49521	3.17731	5.63736
																	1635	4.59469	5.81263	7.09993	3.07825	3.46574	4.75226	3.25411	7.41899
																	1636	3.9206	5.67512	4.03729	3.72246	3.22436	3.0099	3.21008	3.27823
																	1637	5.99106	5.9882	5.84971	3.98754	3.09344	3.00719	3.2252	5.8564
																	1638	6.85445	3.7627	6.42299	4.66098	4.08289	3.59623	3.5693	4.99798
																	1639	6.03202	3.71523	4.17256	3.66686	3.27713	3.37618	3.83543	4.15266
																	1640	5.26791	3.17057	3.48634	3.01613	3.25468	3.1112	3.28182	4.08374
																	1641	13.2431	3.82557	3.37197	3.52964	3.36797	3.69537	3.14382	4.21479
																	1642	8.57936	3.29836	3.61184	3.16273	3.00667	3.52195	3.22866	4.58963
																	1643	4.37714	8.46216	4.26939	3.03006	3.29525	4.17185	3.13651	6.16503
																	1644	8.96377	5.16477	3.21199	3.13446	3.32375	4.19365	3.05298	3.3906
																	1645	5.27755	4.62804	5.55048	3.20052	3.23797	3.54399	3.34357	4.51921
																	1646	9.20916	4.66859	3.72213	5.93047	3.53097	4.09602	3.40229	4.89293
																	1647	5.42529	5.97736	3.99805	3.64877	3.07614	3.07157	3.33202	3.22856
																	1648	5.01005	5.36337	3.3612	3.05921	3.85914	3.71291	3.23365	3.22512
																	1649	7.92512	3.17501	3.14236	4.2718	3.35669	4.30331	4.40474	3.31683
																	1650	8.8348	3.8183	3.14534	3.4961	3.24651	3.73814	3.08934	4.60149
																	1651	5.79877	3.97583	4.05815	3.0721	3.18705	4.56046	3.41704	3.98674
																	1652	4.31811	3.72805	3.51444	3.8391	3.04265	4.32622	3.13975	3.62672
																	1653	5.7179	5.75829	4.03261	3.55358	3.04854	3.64758	3.15579	3.37561
																	1654	9.18215	3.76676	3.09754	4.02239	3.1854	5.49701	3.04723	4.13502
																	1655	11.1932	3.86951	5.30909	3.4245	3.6237	3.02815	3.02467	3.0017
																	1656	6.04066	7.8846	3.19503	4.03919	3.17557	3.03364	3.52935	3.36347
																	1657	7.48456	3.61846	3.33765	5.66864	3.17515	4.07345	3.46871	4.1425
																	1658	9.91013	4.16178	4.25909	3.14295	3.0186	3.86958	3.18174	5.38438
																	1659	7.61038	5.04757	4.84544	3.01519	3.05349	3.69748	3.32093	3.02842
																	1660	6.86015	4.95115	6.41816	4.4364	3.47054	3.78178	3.20743	3.02696
																	1661	5.59005	6.32686	3.07449	3.57099	3.01191	4.01172	3.30749	3.02575
																	1662	5.32705	5.10443	3.86926	3.19571	3.12774	4.44259	3.03797	3.45702
																	1663	3.21219	3.81907	8.15038	3.44459	4.21748	3.16287	6.86055	7.89275
																	1664	4.92009	3.72525	11.5938	3.36516	3.05869	3.12376	4.57439	3.2161
																	1665	3.524	3.78046	7.96385	3.78652	3.0034	3.67364	3.92698	6.87173
																	1666	7.08797	4.30066	10.7777	3.17437	3.89047	3.32741	3.23711	5.36202
																	1667	3.45079	3.22917	3.40191	6.41433	3.51215	4.09764	3.60227	5.64563
																	1668	3.70878	3.60014	3.06273	3.0692	3.43175	3.21012	3.14395	4.79785
																	1669	3.89666	3.30539	3.17698	3.49844	4.1045	4.06867	3.90546	3.37126
																	1670	3.31606	5.18298	4.81261	3.4197	4.5581	3.86914	3.03595	3.8559
																	1671	5.62673	3.07629	3.62786	4.16813	3.28626	3.09507	3.47724	3.00141
																	1672	10.407	3.53854	3.14129	3.51933	3.0145	3.08449	3.16551	4.94998
																	1673	4.44262	3.4776	3.01878	3.26583	3.35118	3.66352	3.20647	3.39596
																	1674	7.21639	4.94481	3.03313	3.05014	3.09172	3.44649	3.01826	3.74719
																	1675	7.16611	3.17483	4.20908	3.103	3.91485	3.54341	3.08423	3.14485
																	1676	4.16095	3.84073	3.41731	3.26293	3.47916	3.06081	3.98827	3.4905
																	1677	7.42359	3.24391	3.09565	3.25332	3.43253	5.25256	3.3881	3.23926
																	1678	4.58664	4.43119	3.54215	3.35991	3.14157	3.30721	3.53812	4.00269
																	1679	3.31021	3.03414	3.37062	3.21398	3.23536	4.50317	3.36351	3.49029
																	1680	6.93621	3.25491	3.43039	3.04888	3.00944	3.50299	4.15759	3.05745
																	1681	4.0935	4.13181	4.5171	3.3332	3.40037	3.28507	3.28703	3.01324
																	1682	3.40084	3.4105	4.07613	3.18956	3.42475	3.87361	3.02839	7.32026
																	1683	3.75001	3.20877	3.31674	4.33007	3.61596	3.46349	3.20249	5.28134
																	1684	3.28224	3.22982	3.04221	3.06041	3.03201	4.6401	3.26665	5.23055
																	1685	3.68982	6.0634	3.0271	3.76692	3.55353	3.31562	3.60655	3.10586
																	1686	11.4439	7.28083	3.57997	3.02432	3.24469	4.98233	4.21725	6.96299
																	1687	4.44367	4.8335	3.89539	4.16946	3.07882	3.02023	6.07804	4.174
																	1688	6.61751	4.05172	3.39317	3.58891	3.11227	4.17578	3.11267	6.52787
																	1689	5.06433	3.58324	3.0953	4.08597	3.60093	4.36261	4.39417	6.58271
																	1690	3.35898	3.3956	4.43879	3.16598	3.07245	3.71019	3.40216	3.58215
																	1691	8.0993	4.73561	3.0241	3.67186	5.62019	3.07358	3.53411	3.03802
																	1692	4.65523	3.83322	4.66327	3.78336	5.19151	3.33635	3.37831	4.0391
																	1693	12.8076	3.22454	3.52387	4.1933	3.22144	3.22747	3.38674	3.13065
																	1694	14.0746	3.28872	3.22304	3.44096	3.39196	3.18523	3.1058	4.29947
																	1695	7.12725	3.38822	3.20392	3.26197	4.26027	3.69271	3.33453	3.82739
																	1696	6.10327	3.15113	3.9801	3.36399	3.15876	6.98155	4.72264	4.46494
																	1697	9.39456	3.5013	3.22515	3.85055	3.65031	3.0306	3.04719	5.3027
																	1698	8.76332	3.78198	3.56818	4.85057	3.33822	3.03948	6.08815	5.38184
																	1699	7.3811	4.48805	3.87373	3.23804	3.70456	4.06053	3.62408	4.56862
																	1700	3.96952	3.66808	3.66567	3.40595	3.04233	3.13165	3.29858	5.35108
																	1701	4.11	3.14502	3.43672	3.11344	3.36734	3.64157	3.08501	4.27492
																	1702	9.02676	3.56393	3.24889	5.70355	3.44132	4.70725	3.80377	4.0385
																	1703	3.17509	3.08614	3.72254	3.02778	3.66751	3.7455	3.66661	4.14614
																	1704	10.3668	7.70927	3.43572	3.42015	5.34997	3.56023	3.02116	6.30502
																	1705	9.8155	3.42368	3.06798	3.03204	3.29526	3.01422	3.0142	3.33769
																	1706	6.30369	9.34263	8.44542	3.45559	3.29373	3.0846	3.16569	3.43678
																	1707	8.86047	4.33991	4.18006	3.16103	3.38796	3.01595	3.47732	3.03872
																	1708	7.6104	5.70439	3.61856	4.19332	3.13958	3.36244	3.33423	3.00948
																	1709	4.62654	6.43029	3.93978	3.42531	3.06782	3.81953	3.0432	3.19177
																	1710	12.6283	4.6911	3.27558	3.08671	5.62578	4.98492	3.69826	3.46103
																	1711	3.45212	4.46197	3.76542	3.21469	3.10228	4.587	3.34939	3.23297
																	1712	12.9492	5.21158	3.15261	3.68518	4.19907	3.65921	3.15405	3.17402
																	1713	11.2416	6.21417	4.19171	3.00177	3.7739	9.7999	3.29557	3.32478
																	1714	4.3571	4.87333	3.03202	3.92111	3.47544	3.23046	3.20787	4.58828
																	1715	8.05968	4.30911	3.03813	3.27261	4.27838	3.06208	3.71491	5.08736
																	1716	10.1795	4.69946	3.09452	3.35338	5.15503	5.39623	3.30304	4.46597
																	1717	10.6234	3.58233	3.52936	4.41825	3.09168	3.31735	3.47132	5.2843
																	1718	6.77063	3.34725	3.40177	3.27503	3.03581	7.03057	3.27649	3.07888
																	1719	7.01692	5.01272	3.10347	3.16532	3.07425	3.53015	3.37552	3.07262
																	1720	5.15871	5.77591	3.02877	3.88448	3.75469	3.19721	4.39991	3.13354
																	1721	6.52481	6.09308	4.08032	3.0709	3.06293	3.62044	3.23347	3.7867
																	1722	6.67651	4.04301	3.75355	3.23554	4.17006	3.06182	3.43789	3.03006
																	1723	5.49501	3.28547	3.04562	3.67852	3.32166	4.14418	3.02895	3.69989
																	1724	4.94067	3.4447	3.77609	3.15257	3.26522	3.11374	3.86753	4.06827
																	1725	3.39592	3.66177	3.21815	5.04171	3.19939	7.01123	3.06013	6.92715
																	1726	3.23707	4.25661	3.18427	3.42228	3.2464	8.36729	3.11838	5.17206
																	1727	6.98388	4.95271	3.1793	3.54192	3.75793	3.59155	3.2048	3.55967
																	1728	3.74756	3.08962	3.13596	3.22945	4.3589	5.2675	3.75916	4.35451
																	1729	3.8644	7.45778	3.08533	4.31165	3.09168	3.67986	3.26459	5.4863
																	1730	6.49708	3.63812	3.58383	4.21457	3.81522	3.09875	3.42544	5.29431
																	1731	5.53683	5.28134	4.33205	3.9825	3.55856	3.98422	3.06912	4.10682
																	1732	3.65414	7.60599	3.16726	3.07398	3.35046	3.42266	3.85971	3.16428
																	1733	4.77825	3.82459	4.18349	3.0165	5.105	6.42508	3.77198	3.08886
																	1734	4.40308	3.10415	3.48002	3.20762	3.74929	6.15217	3.16586	5.44931
																	1735	5.2362	3.40586	5.19455	3.03078	3.42819	4.34081	3.63495	4.48021
																	1736	5.34535	3.29818	3.09932	3.43542	3.86061	5.23808	3.8404	5.30845
																	1737	4.02685	3.50877	4.28114	3.61222	3.34733	3.31361	3.04817	3.13308
																	1738	6.24861	5.07018	3.227	5.19367	3.17717	4.59226	4.26254	4.19895
																	1739	6.05169	3.25638	5.51004	3.41964	3.34934	5.08347	3.25761	4.34728
																	1740	3.41633	4.41965	7.29674	3.11395	3.04618	3.27744	3.94189	3.6866
																	1741	4.00185	5.47246	8.15791	3.14894	3.17195	4.59848	12.3165	3.08922
																	1742	9.68239	4.99072	3.74019	3.10802	4.67784	3.18899	3.1582	3.10582
																	1743	4.75416	4.35749	3.75535	3.02398	3.549	6.52943	3.07577	3.15293
																	1744	4.06883	3.37088	3.35838	4.34665	3.8996	9.44749	3.23822	3.36906
																	1745	5.75614	3.20019	3.18191	3.33746	3.38058	3.33188	3.09653	5.86315
																	1746	3.42386	5.57284	5.9747	3.23337	3.84198	7.16159	3.11494	3.3537
																	1747	3.7093	5.49961	5.29087	3.52021	3.9256	8.08752	3.85902	3.77403
																	1748	6.6327	4.45258	4.25885	4.49839	3.30405	5.37127	3.14392	3.42517
																	1749	5.58677	5.9137	3.46295	4.67302	3.01385	3.79916	3.66956	3.40352
																	1750	5.52602	3.559	6.52991	3.46954	3.95191	6.02295	3.35443	4.74848
																	1751	8.7904	5.52776	3.8546	3.13396	3.07019	4.0035	3.42743	3.31663
																	1752	5.08811	5.18924	7.9514	3.65664	3.62595	4.70614	3.30932	4.41457
																	1753	3.77728	3.47449	12.8813	3.52107	3.14652	3.17922	3.20598	3.01603
																	1754	6.59189	3.44057	3.75365	4.68209	3.92759	3.6938	3.13409	3.5775
																	1755	4.39371	3.08558	4.03994	3.13422	3.02254	5.09724	3.23168	3.09524
																	1756	6.08848	5.60434	3.31247	3.62091	3.38933	3.55129	3.06688	3.71116
																	1757	7.73821	3.95877	3.04189	3.64323	4.86701	5.19042	3.56051	3.04308
																	1758	7.75027	4.4272	3.09207	4.5698	3.47849	5.20466	3.07538	3.32604
																	1759	6.67938	3.27262	3.25123	3.33015	3.2784	4.27013	3.45119	3.36921
																	1760	8.04829	3.20216	3.33866	3.8202	3.54284	3.35997	3.32561	3.19142
																	1761	6.71327	5.59778	3.08114	4.07926	3.37484	3.13989	3.18531	5.0753
																	1762	4.92385	3.05736	5.50029	3.1108	3.74939	4.68967	3.92512	3.61148
																	1763	4.44289	3.05464	3.97671	4.43233	4.61552	3.04815	3.94241	6.80121
																	1764	6.51869	4.03944	3.8887	3.78819	3.10142	5.70192	3.28996	5.58494
																	1765	9.25848	3.03229	4.35626	3.42404	3.17886	3.35004	3.28912	3.55944
																	1766	6.61714	3.14145	4.19699	3.82544	4.38829	4.09165	3.17382	3.83758
																	1767	4.6883	3.13952	3.17162	3.54294	3.24645	6.10858	3.23883	3.31235
																	1768	13.4143	3.345	7.38759	3.00758	3.31598	3.50015	3.22203	4.18765
																	1769	3.62921	3.82424	3.02311	6.82287	4.21966	3.06771	6.65778	3.19372
																	1770	5.71672	3.15196	3.72744	3.01474	3.26198	6.8554	3.06594	3.49067
																	1771	6.53448	3.13071	3.05782	3.07881	3.17201	4.19711	3.20507	3.13411
																	1772	5.13189	5.68246	3.00246	3.8984	3.61829	3.89804	3.8871	3.28954
																	1773	8.41469	7.00333	3.36888	3.14269	3.02245	3.03759	3.25143	3.03824
																	1774	6.9716	5.91737	3.29547	3.95445	3.02375	3.14845	3.43979	3.03248
																	1775	6.06325	7.06101	4.14311	3.06006	3.0896	3.5972	3.38794	3.5087
																	1776	4.86792	6.32508	7.02084	3.23061	4.22015	4.63613	3.54717	3.0498
																	1777	3.08429	5.69887	6.00238	3.49068	3.03115	5.6133	3.48482	4.29698
																	1778	3.84626	7.39714	4.20926	3.59793	3.41883	5.95412	3.93025	3.95877
																	1779	3.24916	5.69832	4.27326	3.41802	3.98293	5.27598	3.09425	3.93657
																	1780	3.03595	3.18687	4.43576	4.57176	3.04118	4.00255	4.41217	3.69693
																	1781	4.3518	3.0382	3.35878	3.53572	3.86783	4.64259	3.40422	3.76015
																	1782	4.00068	3.36904	4.93994	3.40992	3.57183	3.02894	3.3498	3.14857
																	1783	3.59626	8.63497	3.58316	4.86569	3.0524	4.3061	4.00906	6.83928
																	1784	5.3736	4.20637	3.13794	3.35725	3.18539	5.56951	3.39855	3.02358
																	1785	3.50669	4.74894	3.70881	3.37086	3.80541	3.64864	8.78996	4.23878
																	1786	3.07228	4.26261	3.07075	3.04084	3.20233	3.53017	3.43084	3.04382
																	1787	9.30396	3.51705	3.3344	3.08454	3.69529	3.15656	4.18248	3.94421
																	1788	9.17376	3.47192	3.32072	3.56807	3.09371	3.2901	3.44895	3.15365
																	1789	5.22913	3.17224	4.30545	3.03327	3.65428	6.12092	3.34114	3.79213
																	1790	6.78546	3.76859	3.33677	3.60654	3.37264	11.6183	3.15417	4.07042
																	1791	6.46076	4.10789	3.28103	5.20188	3.64504	4.19694	4.17084	3.55242
																	1792	3.96332	4.97553	3.55462	3.1702	6.61934	7.78278	4.14336	3.31506
																	1793	4.28593	3.68019	3.15908	6.11008	3.05036	6.73284	3.08364	3.17101
																	1794	8.33609	4.28228	3.99732	3.34787	3.1888	10.3962	4.39965	3.03727
																	1795	3.1109	3.55106	3.91403	3.99604	3.00202	5.8654	3.26817	3.14788
																	1796	3.11811	3.4087	4.17446	4.06471	3.0584	3.0863	3.20726	3.04177
																	1797	18.3874	4.18194	4.80117	3.17768	3.03627	3.22436	3.63897	3.12815
																	1798	11.9565	6.54887	3.11291	3.97867	3.14569	5.84995	3.13687	3.89806
																	1799	3.52745	4.17103	4.23107	3.12293	3.5377	3.35	3.5984	3.2999
																	1800	3.29283	3.19046	5.09281	3.70932	3.88574	6.33655	3.44343	3.52476
																	1801	4.47109	3.48574	3.07536	4.76326	3.54919	3.20769	3.12968	3.9585
																	1802	3.79434	5.2843	3.51901	3.05045	3.45744	3.60613	3.40978	3.90439
																	1803	3.34432	3.8549	3.06205	3.05653	3.02192	5.3081	3.09417	3.64076
																	1804	6.75727	4.56588	5.09219	4.02408	3.25362	6.98914	3.68481	3.71969
																	1805	7.51154	3.95675	3.10007	4.22688	3.20327	3.14984	3.33751	5.12863
																	1806	9.9043	4.96924	3.28334	4.37858	3.10543	3.40436	4.69059	3.66811
																	1807	7.38086	4.34999	3.86229	3.03207	3.16382	3.11708	3.31145	3.47936
																	1808	6.80528	3.01673	3.80787	3.04293	3.70037	3.11223	4.12595	3.54101
																	1809	7.24339	4.52917	3.0459	3.66346	4.81394	3.1057	4.10387	5.63344
																	1810	8.30662	3.1201	3.65018	3.69502	3.65411	4.52759	3.33798	3.03895
																	1811	8.94283	3.70819	3.03258	5.20385	4.26745	3.07148	3.19738	4.99329
																	1812	7.18931	5.14631	3.02052	5.20521	3.00713	3.03607	4.56167	3.21246
																	1813	10.4428	4.31628	4.15414	3.96476	3.61284	5.85197	3.73452	4.23005
																	1814	6.29563	3.22577	3.25638	3.51597	3.98047	3.40574	3.36796	4.62713
																	1815	7.83026	7.50515	3.82777	3.21772	3.28878	3.47465	3.03902	4.0435
																	1816	7.85938	3.71664	4.7142	3.36388	3.02183	3.12156	3.07191	4.36998
																	1817	5.34495	5.40778	3.29153	3.0559	3.89736	3.35544	3.05597	3.0948
																	1818	3.17945	3.87531	3.10582	6.42271	3.08832	3.70381	4.2683	3.08128
																	1819	6.47986	4.6666	3.67191	3.01989	4.58748	3.98395	3.16619	4.19578
																	1820	3.23753	4.18948	3.243	3.2315	3.58931	4.39496	3.28184	3.50592
																	1821	7.73819	6.34246	3.44683	4.68072	3.06985	3.63807	3.06045	3.1034
																	1822	6.57889	6.10358	3.11763	3.08364	4.42047	4.16065	4.67792	4.40059
																	1823	3.3882	3.35666	4.451	3.75304	3.40331	3.24631	5.52116	4.08105
																	1824	8.2734	5.42265	3.22624	3.04172	3.31512	3.0525	6.13715	3.57199
																	1825	3.73635	5.68276	3.48697	3.51054	3.56931	4.23929	3.72351	3.22346
																	1826	7.78833	3.01789	3.46806	4.478	3.48206	3.45239	3.25597	3.18124
																	1827	9.63924	4.26991	3.49091	3.4723	3.25051	3.9371	3.14875	4.76267
																	1828	5.981	3.06887	3.02426	3.43061	3.46969	5.20433	3.52009	3.06099
																	1829	5.29011	5.5591	3.77617	3.75817	3.07062	6.60892	3.19777	3.02891
																	1830	7.18442	3.5582	4.01998	3.6064	3.0731	3.38533	3.99006	3.84369
																	1831	4.87159	4.91696	4.2882	3.24042	3.60688	5.75238	3.55002	3.02901
																	1832	5.73828	5.98749	3.07452	4.0589	3.86812	3.01965	4.24927	3.33348
																	1833	4.08871	4.53419	3.08392	5.03402	3.85709	4.61589	3.19906	3.18817
																	1834	3.75631	3.0319	3.46389	3.3281	6.59338	4.45625	3.30152	3.11053
																	1835	3.88025	3.80329	3.34164	3.85726	3.04185	3.64975	3.4986	3.01996
																	1836	3.71778	6.40223	3.52424	3.24519	3.02557	3.032	3.07113	3.02316
																	1837	3.15666	3.83913	3.38317	3.2636	3.75702	3.33716	4.38506	3.38123
																	1838	9.91646	3.05892	5.51918	5.16976	3.09618	4.10666	3.22547	3.56897
																	1839	4.44861	6.04152	3.94951	3.11241	4.32681	3.78453	3.57794	4.47871
																	1840	9.80038	3.30481	4.02913	3.44241	3.42184	4.29748	3.28162	4.01429
																	1841	6.7245	3.95044	3.29571	3.24242	3.37915	7.63268	3.72491	5.57735
																	1842	9.6065	4.32623	3.14148	3.62871	3.07954	3.47943	3.08171	3.42248
																	1843	4.17754	5.56209	3.78702	3.17924	3.06188	5.23104	5.16103	3.47664
																	1844	4.92675	5.01968	3.57023	4.7069	3.13959	3.32034	4.1292	4.65484
																	1845	5.018	4.12112	3.27185	3.34371	3.45594	4.40261	3.36313	3.37353
																	1846	6.15334	3.06717	3.47529	3.58752	4.71308	8.45482	3.00081	3.82491
																	1847	4.14339	5.31086	4.23803	3.43319	4.44394	3.82917	3.15251	3.26637
																	1848	4.75903	3.82965	3.03111	3.2521	3.24839	4.57098	3.91309	4.59194
																	1849	4.34897	7.17113	3.13684	3.22141	3.92925	4.44151	5.37181	3.24735
																	1850	3.34265	3.58674	3.38713	3.3924	3.47362	5.00711	3.86868	3.12678
																	1851	3.50686	3.05006	3.5327	3.39908	4.00149	4.01699	3.34011	3.50327
																	1852	3.22962	3.58644	3.32854	3.41335	4.57219	5.02534	4.36998	3.89348
																	1853	7.03921	5.38902	3.4296	3.03794	3.01305	4.17674	3.49588	4.07741
																	1854	6.39002	3.90921	3.4429	3.85781	3.88566	6.22564	3.06561	3.08931
																	1855	5.57921	3.1302	3.0143	3.61146	3.86474	5.41568	3.44537	3.25677
																	1856	6.42977	3.89966	3.01661	4.12194	3.02496	3.17767	4.42234	3.10853
																	1857	5.50221	7.67791	3.05606	3.28643	4.19658	3.52119	4.99995	3.80741
																	1858	5.65393	3.09997	3.42215	3.13843	4.24962	3.10847	3.78375	4.39755
																	1859	6.00157	4.96167	4.09038	3.2329	4.0006	4.13743	3.28389	3.95606
																	1860	4.73762	4.53838	14.1187	3.12092	3.2228	6.2699	3.62564	6.41519
																	1861	4.05439	3.32793	3.02832	3.24884	3.17538	4.91276	3.02225	5.43578
																	1862	5.0228	4.13511	3.25503	3.36312	3.69278	3.83927	3.27473	4.53095
																	1863	6.73257	4.86336	3.18875	3.18012	4.41553	6.23558	3.05701	4.72521
																	1864	9.21091	3.66732	3.53946	3.32226	3.11117	5.62564	3.14302	3.40607
																	1865	4.99994	3.4215	4.47752	3.1919	3.31378	4.35589	3.14823	3.74742
																	1866	7.79165	3.2044	3.53442	3.04614	3.45396	5.36393	3.28278	4.17087
																	1867	4.04208	3.48035	3.07852	3.5827	3.01702	3.06717	3.39051	4.86066
																	1868	5.28387	4.00849	3.25631	3.04694	3.05388	3.62281	4.62242	4.53794
																	1869	6.95814	4.59983	3.68827	3.17705	3.11778	5.6743	3.76903	3.80934
																	1870	4.47408	4.26359	4.16016	4.42404	3.288	3.69969	3.18566	3.19204
																	1871	3.54389	4.09407	4.21622	4.04387	5.33217	4.58962	5.2459	3.23766
																	1872	3.32999	6.98825	3.30613	3.15893	4.01841	6.46758	3.11814	3.02763
																	1873	4.06582	7.63804	3.17493	3.01204	3.37354	5.55982	3.24026	3.13115
																	1874	3.87909	5.60692	3.08469	3.95818	3.10336	3.83141	5.92368	3.00733
																	1875	3.00527	4.66339	3.72284	3.61145	3.47445	3.10102	3.31228	3.32401
																	1876	3.68303	3.41405	3.62269	3.7248	3.55168	3.70958	3.06255	3.33823
																	1877	3.23856	8.22082	3.00413	3.04206	3.92899	4.41675	3.92917	3.61967
																	1878	6.30581	4.63271	3.98425	3.2911	6.14859	4.55403	13.2024	3.78527
																	1879	4.58164	3.83059	3.34144	3.10626	3.58802	4.24485	4.3258	3.13789
																	1880	6.05343	8.87108	3.25951	4.71817	3.21222	4.47557	3.02156	3.43592
																	1881	4.15734	3.94727	3.9597	3.29971	3.20296	3.41856	4.32087	4.02641
																	1882	4.58092	5.17999	3.38582	3.48398	3.00113	3.69048	5.17996	4.85114
																	1883	4.11944	3.95505	3.84156	4.22909	4.11397	5.34695	3.41495	4.47709
																	1884	3.62762	3.89967	3.10786	3.70752	3.20373	6.10953	3.73631	3.09329
																	1885	3.58613	4.12939	3.32447	3.07792	3.76066	4.5716	4.9085	3.46527
																	1886	3.83983	4.24249	6.74985	3.78846	3.68711	3.74046	3.3234	3.49752
																	1887	6.52219	3.14149	5.57065	3.10903	3.03854	3.63596	4.09532	3.90662
																	1888	8.57021	3.08109	4.48193	3.7095	3.62094	4.37689	3.1225	4.06921
																	1889	6.50438	3.43426	3.01913	4.25183	3.16276	3.35105	3.7426	4.95707
																	1890	6.37905	4.63798	4.95188	3.98757	3.02147	5.25506	5.95238	4.39044
																	1891	6.56784	3.11062	3.49239	3.80723	3.10257	7.74986	3.02614	3.06171
																	1892	4.34967	3.02525	3.01781	3.29493	3.45527	3.23813	3.34032	3.34086
																	1893	5.4099	4.99774	3.12623	3.26979	3.76925	7.5189	4.36974	4.06159
																	1894	4.8969	3.68695	4.42825	4.04089	4.27126	3.86563	7.15543	3.14722
																	1895	5.26674	3.21462	3.17462	3.45867	3.03674	3.35097	3.48956	3.0173
																	1896	4.61471	5.82289	5.2246	3.35114	5.01565	3.96478	3.15225	4.18584
																	1897	6.22319	5.13213	5.0466	3.04372	3.52635	4.10175	3.83354	5.44113
																	1898	3.26129	8.57905	3.09067	3.33875	3.05269	3.39492	3.3603	5.72585
																	1899	5.87936	15.9309	3.47614	4.1906	4.60206	4.60291	4.31651	6.28006
																	1900	7.22179	5.14263	3.49452	3.44593	3.02709	3.45432	3.25132	5.26392
																	1901	6.16484	3.3739	3.68284	3.1122	4.4161	5.42038	4.47308	5.99425
																	1902	4.29923	5.14337	5.25091	3.45029	3.37922	3.22215	3.84489	3.80793
																	1903	4.88127	3.94776	3.15349	4.13616	3.01498	4.05989	3.14287	3.50747
																	1904	5.40488	3.89997	3.3576	4.93103	3.09917	3.95685	3.88876	4.04783
																	1905	4.88249	4.2836	4.80068	3.41865	3.86884	7.40626	3.00785	3.23717
																	1906	9.09709	4.51231	3.94388	3.95168	3.52614	3.60725	3.08877	5.79955
																	1907	6.66406	3.10366	3.71759	3.13557	3.70194	5.63259	3.44196	5.03969
																	1908	9.70576	5.41687	3.34303	3.6174	3.34295	9.60138	4.07729	3.83762
																	1909	6.11087	3.08272	3.2653	3.33573	3.74945	8.03656	3.75574	3.59791
																	1910	8.98644	4.43167	3.27316	3.73811	3.77071	3.41883	4.08349	3.28305
																	1911	4.35624	3.06746	4.87878	4.08144	3.6162	5.16465	4.8527	5.48522
																	1912	6.31366	5.23548	3.60802	3.31303	3.07087	5.19208	3.13206	3.25864
																	1913	5.00667	3.2823	3.00794	3.0558	5.71765	4.69802	5.07118	3.28298
																	1914	5.98823	4.24897	3.12358	3.339	3.11047	11.5108	3.74634	3.09937
																	1915	3.17496	3.265	3.13388	4.84785	3.50984	3.5181	3.01851	3.35142
																	1916	3.07752	4.38588	3.03322	4.81502	5.81657	3.82568	3.81558	3.68721
																	1917	3.94759	4.67738	3.11089	5.29811	5.17339	4.36705	3.73886	4.17442
																	1918	7.66862	4.39519	3.74672	3.40932	3.60361	3.89246	4.68298	3.96391
																	1919	5.57772	3.57497	3.55375	3.24486	3.96609	3.4889	4.09673	3.08929
																	1920	8.14722	5.13993	3.23471	3.22422	4.0885	6.29554	3.19951	6.93842
																	1921	8.90987	4.84368	3.31934	4.72873	4.18853	4.26984	3.41232	4.57637
																	1922	7.22502	4.35209	3.78523	3.53311	3.6097	5.71853	3.44368	3.88593
																	1923	3.96622	3.97781	3.31964	3.35359	3.73079	5.99938	3.19191	3.55831
																	1924	8.07649	3.04369	3.85852	3.37129	3.09762	3.58717	3.00971	3.80686
																	1925	5.40678	4.19575	3.57153	4.27964	3.45244	4.21959	3.67196	3.6508
																	1926	7.52247	3.83814	3.75662	3.06054	4.38352	3.30243	3.02709	3.03208
																	1927	6.10812	4.50131	3.31954	3.78269	3.25992	4.15785	3.02269	4.47011
																	1928	6.7764	3.5758	4.40618	3.13862	3.49221	3.00171	3.07907	4.43087
																	1929	6.81765	3.69548	3.1447	3.16259	3.29304	4.73608	3.17135	3.08027
																	1930	11.5555	4.81158	4.2185	3.19088	3.46394	4.63149	3.16856	3.47003
																	1931	8.34094	3.5586	3.39775	3.01805	3.72699	3.92854	3.1443	3.44
																	1932	8.62723	3.17339	3.13701	3.33066	4.31728	3.29068	3.23531	3.23714
																	1933	8.18884	3.15118	5.45763	3.24326	3.71451	3.00396	3.08148	6.19666
																	1934	4.57258	3.02376	3.04835	3.16841	4.95307	3.30833	4.10994	3.47323
																	1935	13.5319	3.03771	3.28015	3.60675	3.08108	3.01098	3.16329	3.11452
																	1936	3.29798	3.87429	3.96828	3.125	3.02017	3.12921	3.12545	3.08909
																	1937	3.88296	5.05571	4.94858	3.48053	3.39802	3.46225	3.08116	3.21753
																	1938	3.20125	3.64323	3.30781	4.00468	3.05132	3.56639	3.19131	3.03402
																	1939	10.0337	3.31402	3.80126	3.06988	3.38346	4.25097	4.17287	3.913
																	1940	5.4421	6.62189	4.06651	3.00698	3.28584	8.28276	3.18169	3.25152
																	1941	3.99761	3.03222	4.42453	3.25259	3.31195	5.28263	3.04844	3.80472
																	1942	3.78695	6.3172	3.26359	3.80354	3.30041	4.06134	3.06228	3.47688
																	1943	4.37612	4.54754	3.93884	4.7179	3.05927	3.22524	3.52061	3.55994
																	1944	4.68182	3.74464	3.34745	3.52876	3.04472	5.89964	3.51737	4.58157
																	1945	6.06292	3.16223	4.3694	3.38326	3.24308	4.14236	3.22226	3.9404
																	1946	8.52179	6.34388	3.02695	3.0276	3.47561	3.63877	3.1261	3.29832
																	1947	6.35398	8.1538	3.3225	3.57596	3.53674	6.53726	3.05505	3.39874
																	1948	3.58686	3.96833	3.27932	3.11861	5.71358	5.26216	3.04805	5.0527
																	1949	4.56775	3.54494	3.15592	3.04563	3.26958	3.07433	3.22015	5.80081
																	1950	3.27774	4.16715	3.15068	3.54585	3.20916	4.71326	3.52748	3.04289
																	1951	4.2291	7.17864	3.10192	3.6886	4.49621	3.04142	3.54367	4.01948
																	1952	3.32891	4.41169	3.76455	5.91099	3.21686	3.03693	3.49635	3.78325
																	1953	3.37328	3.41153	5.90522	7.91632	3.06739	3.02449	4.59415	3.2011
																	1954	7.08055	6.18735	4.31446	5.39886	3.17566	6.63794	3.76988	3.74317
																	1955	3.09269	3.11034	3.60698	6.84973	3.11886	3.05831	3.62513	3.38165
																	1956	4.87216	4.84362	3.02766	3.12301	3.80805	3.00169	3.17336	3.48908
																	1957	3.65102	3.85778	3.03515	3.07983	3.06033	3.282	3.1354	3.28473
																	1958	5.52209	6.4092	3.35769	3.31807	3.33065	3.11276	3.00135	3.69469
																	1959	9.76716	6.5636	6.0793	4.04244	4.16809	3.96504	3.19618	3.21528
																	1960	5.37771	5.08916	5.00333	3.70141	3.30309	3.49792	3.47087	4.40577
																	1961	5.98487	3.19971	4.18517	4.41061	3.9275	11.0653	3.96344	3.54851
																	1962	8.35742	4.40634	4.09102	5.1951	3.74203	4.60279	3.04808	3.12713
																	1963	5.38604	4.44007	3.37466	4.73253	3.75492	6.69465	3.36635	4.29787
																	1964	4.04285	4.23803	3.70892	4.87768	3.04666	5.45763	3.54201	4.26965
																	1965	5.60013	4.29697	3.15231	3.67196	3.30453	7.42206	3.77985	3.69859
																	1966	3.19549	5.58531	3.23764	3.54228	4.70837	3.6281	3.02923	3.18487
																	1967	5.25648	4.09315	3.14182	7.32612	4.17536	3.19614	3.19817	4.66482
																	1968	3.3387	6.58034	6.01466	3.04647	3.62023	6.37524	4.64823	3.21806
																	1969	6.55003	3.59642	3.72229	3.91425	3.65374	3.8812	3.37148	3.15482
																	1970	4.03126	3.47215	3.85476	4.84701	3.75291	3.29312	4.51792	4.64831
																	1971	3.94802	4.3438	5.74272	3.14336	3.04039	3.38393	5.18713	3.66835
																	1972	3.72246	5.04307	5.17744	3.86865	3.00702	3.90632	3.10248	3.77532
																	1973	3.03354	3.43903	3.41411	3.7406	3.43431	3.78356	3.08443	3.40181
																	1974	3.70408	3.55826	3.44753	4.80357	3.04674	5.75614	4.18118	3.06775
																	1975	3.90076	5.62987	10.1425	3.67316	3.08137	4.22259	3.67484	3.71759
																	1976	3.49553	3.38814	11.9773	5.33343	3.60554	6.35156	6.1571	4.42617
																	1977	3.00459	4.79387	3.27613	5.73068	3.1461	4.56325	6.20737	4.63095
																	1978	3.47444	3.49492	4.34277	5.50242	3.12455	3.32099	5.1407	3.70817
																	1979	3.0718	3.78198	3.03184	4.26059	3.87326	5.58029	3.31707	3.78354
																	1980	3.51432	3.15121	3.67409	3.84513	3.20347	3.64156	3.27956	3.66268
																	1981	5.91578	6.91913	3.18176	6.08232	3.16232	5.15699	4.23682	3.11689
																	1982	3.63692	3.81043	3.96714	4.00874	3.17958	3.22173	4.03165	3.15854
																	1983	4.62168	3.54393	3.12449	7.50209	3.23316	4.6365	3.6027	4.04791
																	1984	4.2295	4.8076	3.10796	5.92535	4.23311	4.78129	5.30072	3.48559
																	1985	3.04303	5.36442	3.46309	4.57538	3.76122	3.98778	3.28701	3.60739
																	1986	10.0111	4.44585	3.47148	5.5428	3.42905	3.90656	3.41872	4.9675
																	1987	11.7851	3.0897	3.20847	8.97466	5.89156	3.85132	3.43602	5.66333
																	1988	8.03087	3.05176	4.36167	4.39626	3.22961	4.08854	3.16583	3.63386
																	1989	7.45924	4.66054	3.50992	5.88747	3.15931	5.13187	3.02195	3.28137
																	1990	9.90456	4.11736	3.1911	9.06292	3.22098	3.2552	3.5893	3.17932
																	1991	5.36874	5.66098	3.84373	3.61864	3.54888	3.45471	3.61193	3.53933
																	1992	3.69418	6.26265	3.52691	4.14265	3.05762	4.70479	3.14362	3.52425
																	1993	5.97755	7.22217	3.08905	5.18959	5.12101	3.17881	3.20927	4.35504
																	1994	4.90154	5.21934	3.00102	3.07327	3.48051	4.50358	3.64589	3.27374
																	1995	6.01075	4.91666	3.33942	3.22649	3.63568	3.64344	3.0787	3.88047
																	1996	5.66012	4.12354	4.71209	3.42141	3.5876	4.27808	3.59758	3.04798
[truncated: 3,792 more rows]
