# Supplementary material for: Excitatory neurotransmission activates compartmentalized calcium transients in Müller glia without affecting lateral process motility
Source: eLife. 2021 Dec 16;10:e73202. doi: 10.7554/eLife.73202 (PMC8806189; doi:10.7554/eLife.73202)
Supplement: Figure 3—source data 2. [file elife-73202-fig3-data2.xlsx]

## Sheet: Figure 3-source data 2
	Proportion ROIs responding per wave (Figure 3 - figure supplement 1A)						Z scored deltaF/F per wave-associated transient (Figure 3 - figure supplement 1B)
	ACSF		DNQX				ACSF		DNQX
wave #	stalks	LPs	stalks	LPs		transient #	stalks	LPs	stalks	LPs
1	0.0526316	0.048	0.0379404	0.04		1	3.1786	3.58	4.00302	3.16387
2	0.075188	0.06	0.0325203	0.052		2	3.53016	3.45991	3.82533	3.18749
3	0.0601504	0.072	0.0406504	0.06		3	3.02168	5.45044	4.04737	3.46626
4	0.075188	0.076	0.0487805	0.044		4	3.71345	3.95413	3.25184	3.44046
5	0.0325815	0.076	0.0514905	0.048		5	7.16975	4.05605	3.02934	3.15268
6	0.034188	0.0833333	0.0131579	0.012		6	3.15896	3.05823	3.75957	3.08951
7	0.0897436	0.13	0.0368421	0.02		7	3.8565	3.47067	3.54069	3.84916
8	0.0512821	0.1	0.0184211	0.008		8	3.63129	3.71579	3.15359	3.0462
9	0.0343137	0.024	0.0447368	0.016		9	3.68469	3.25563	6.38448	3.05905
10	0.0588235	0.076	0.0315789	0.032		10	3.85447	3.34583	3.26851	3.09061
11	0.0588235	0.088	0.0368421	0.032		11	3.14486	3.15009	3.8197	3.20192
12	0.0612745	0.056	0.0210526	0.032		12	3.21565	3.51876	3.92544	3.03787
13	0.0595745	0.12	0.0236842	0.028		13	3.14675	4.5921	3.02986	3.44872
14	0.075188	0.133333	0.0236842	0.028		14	3.25234	4.03898	3.00947	3.43693
15	0.0601504	0.103333	0.0544959	0.136667		15	5.31308	3.22918	4.26371	3.36231
16	0.0888889	0.176667	0.0463215	0.123333		16	3.70432	3.38122	4.9363	3.7003
17	0.0465116	0.116667	0.0110497	0.048		17	3.02805	3.68041	5.94372	3.42951
18	0.0439276	0.133333	0.0331492	0.056		18	3.26691	3.02579	3.14883	3.06203
19	0.113695	0.246667	0.00828729	0.028		19	3.00252	3.0037	3.17093	3.46802
20	0.116279	0.233333	0.0414365	0.032		20	3.27456	3.75064	4.5893	3.07447
21			0.0110497	0.032		21	3.14751	3.68256	3.56763	3.94124
22			0.0347826	0.04		22	3.48367	3.76569	3.05751	3.04037
23			0.0463768	0.024		23	3.05206	3.1428	3.57142	3.12642
24			0.0173913	0.04		24	3.10887	3.18388	3.50265	3.55464
						25	4.70953	3.05052	3.89418	3.10901
						26	5.26213	3.28251	3.2946	3.14708
						27	6.17682	3.07207	4.02821	3.32766
						28	3.28334	3.32851	3.51267	3.93909
						29	5.46713	3.35508	3.13312	3.58523
						30	5.06007	3.24543	4.45988	3.61534
						31	3.77073	3.15269	3.3144	3.76879
						32	3.10018	3.63231	3.54627	3.02516
						33	3.37145	3.12094	3.30147	3.6133
						34	3.75611	3.35967	3.26478	3.07825
						35	3.44395	3.77546	3.10151	5.51359
						36	3.12465	3.02088	3.97889	3.20339
						37	4.6222	4.18057	3.33768	3.49856
						38	8.06744	3.73793	3.14828	3.70333
						39	3.80104	3.25441	3.17839	3.9964
						40	3.37354	3.1399	3.27246	3.29977
						41	3.53906	4.1025	3.72764	3.13165
						42	3.91351	3.23992	5.55184	3.76884
						43	3.62112	3.13415	3.37801	3.71788
						44	3.18228	3.61904	3.18968	3.22478
						45	3.38812	3.0861	3.57464	3.07125
						46	3.01194	3.359	3.66231	3.00146
						47	5.40795	3.89245	3.63481	3.31257
						48	6.89935	3.01312	3.59272	3.83749
						49	3.1397	3.73453	4.24151	3.01843
						50	3.53454	3.03945	5.57662	3.01487
						51	3.04123	3.37747	4.02898	3.59922
						52	7.32499	4.15389	4.24982	3.22857
						53	3.68954	6.20282	3.69114	3.46264
						54	3.14367	4.83283	3.39804	3.90131
						55	3.35228	3.04376	3.35483	3.1829
						56	4.38978	3.02066	3.10801	3.45926
						57	5.76926	3.4709	3.46255	3.4587
						58	3.12014	3.35023	3.29364	3.49301
						59	3.95618	3.19207	3.70048	3.83973
						60	3.37967	3.5611	3.32274	3.01444
						61	3.7386	3.61233	3.04601	3.92641
						62	3.03932	3.81207	3.6045	3.72939
						63	4.26881	3.07603	3.09329	3.09241
						64	3.10663	3.00862	3.16285	3.19514
						65	3.31843	3.10779	3.01699	3.3396
						66	3.10037	3.88523	3.25522	3.27246
						67	3.30748	5.64716	3.95271	3.51227
						68	3.06437	4.76923	8.82445	3.09767
						69	3.88565	3.43869	3.83719	3.30578
						70	3.29263	3.20251	5.0373	3.80845
						71	3.40607	3.365	3.04141	3.27715
						72	3.42237	3.03399	3.6084	3.48933
						73	3.68678	3.00904	3.50483	3.17133
						74	3.21261	3.23804	3.23169	3.38816
						75	4.44749	5.63034	3.21158	3.73532
						76	3.07151	4.08442	3.14956	3.05326
						77	3.12223	3.51653	3.02971	3.90095
						78	6.78794	3.23878	3.269	3.1266
						79	3.35133	3.5328	3.00008	3.18624
						80	3.17636	3.1695	3.83927	3.20934
						81	4.4673	3.16121	3.70656	3.30781
						82	3.21786	3.30858	3.84726	3.51151
						83	3.07748	3.15688	3.35104	3.09764
						84	3.12619	4.43158	3.63723	3.00215
						85	3.35454	3.4571	3.67404	3.257
						86	3.24508	3.42203	3.05139	4.06292
						87	4.17995	3.64676	3.991	3.0267
						88	3.14705	3.25295	7.89521	3.2981
						89	3.19718	4.19295	5.15409	3.07345
						90	3.42377	3.02455	3.02109	3.06386
						91	3.07772	3.07521	3.00401	3.72153
						92	5.24711	3.63166	3.45952	4.83972
						93	3.18488	3.19303	4.11141	3.68764
						94	3.30563	3.08715	3.01541	3.43051
						95	3.4428	3.16557	3.24077	3.01945
						96	3.22393	3.89423	3.91035	3.00428
						97	3.82696	3.6299	3.9063	3.30294
						98	3.23319	4.96935	3.14305	3.04223
						99	3.21503	3.79959	3.08209	3.72011
						100	3.50075	3.61886	3.33572	3.30186
						101	3.95556	3.37751	3.67397	3.13802
						102	3.44688	21.8513	3.35918	3.11187
						103	3.36607	3.36612	3.65181	3.11273
						104	4.51053	3.35333	3.92265	3.71451
						105	3.31371	3.49576	3.00884	3.07619
						106	6.73823	3.89161	3.09851	3.05916
						107	3.04771	3.13284	3.11156	3.20753
						108	5.09447	3.51275	3.04394	3.08327
						109	3.4589	3.33899	3.39693	3.03209
						110	5.30456	4.75912	4.12628	3.45111
						111	3.00403	3.15033	3.09938	3.45363
						112	3.28607	3.52626	3.79374	3.00453
						113	3.62194	3.07699	3.49761	3.52023
						114	8.18455	3.39826	3.13293	3.5751
						115	3.60639	3.63614	3.02608	3.52682
						116	3.26398	3.02477	3.32598	3.84827
						117	3.15013	3.91388	8.24381	3.23368
						118	3.72738	3.07702	3.37185	3.58656
						119	3.92176	3.80323	3.39922	4.11558
						120	3.21609	3.74812	4.23412	4.66442
						121	3.22819	3.56544	3.42437	3.32943
						122	8.62786	3.07577	3.39391	3.33503
						123	3.17909	3.2662	3.98431	3.42466
						124	5.97102	4.25576	3.01667	3.33963
						125	3.38148	4.15735	3.5761	3.087
						126	3.09713	3.88498	3.14414	3.90978
						127	3.2436	3.80816	3.0405	3.16258
						128	3.32838	3.28407	3.60045	3.24581
						129	3.07617	3.19026	3.51486	3.85864
						130	3.40527	4.95537	4.02061	4.74091
						131	3.10331	4.18326	3.56276	3.7217
						132	4.08411	3.35741	3.30082	3.05941
						133	3.14806	3.09849	3.07681	3.43866
						134	4.33408	3.35448	3.22443	3.75655
						135	3.57922	3.06992	3.89342	3.97753
						136	3.38191	3.24519	4.39101	3.27088
						137	3.73887	3.27665	3.14009	3.0366
						138	3.68544	3.11993	3.72685	3.17612
						139	3.27933	3.40778	4.65602	3.17161
						140	3.0224	3.0445	4.64745	3.12087
						141	4.19986	3.24811	3.16221	4.29249
						142	3.29024	4.2699	4.12473	3.30597
						143	3.01742	3.7392	4.10738	3.36663
						144	3.02422	3.29986	3.1421	3.23229
						145	3.04103	4.59999	3.08465	3.01564
						146	3.21841	3.38074	3.01461	3.30082
						147	3.79377	3.07235	3.12016	3.66041
						148	3.06997	3.41223	3.01158	3.40308
						149	3.25639	3.59923	3.11072	3.70723
						150	3.67458	3.46761	3.54346	3.3581
						151	3.04637	3.09028	3.5081	3.54603
						152	3.57293	3.459	3.18993	3.21851
						153	3.87367	4.88761	3.04294	3.03036
						154	3.30494	4.21524	3.52421	3.01444
						155	3.71629	5.48393	3.27964	3.65098
						156	4.85937	3.21375	4.61295	4.08332
						157	3.57155	3.64664	3.75405	4.26139
						158	3.02962	3.93734	3.3991	3.70371
						159	4.98385	4.03303	3.32528	3.1674
						160	3.12413	3.46169	3.05871	5.46875
						161	4.08839	3.38884	3.69007	3.34339
						162	3.0077	3.33959	3.83457	6.73339
						163	5.733	3.04968	3.35012	4.9271
						164	3.58411	3.28142	3.80069	4.87302
						165	7.60816	3.04493	3.16644	5.36802
						166	3.16236	3.08434	3.17199	4.48482
						167	3.57382	3.00026	4.29699	3.34821
						168	3.62751	3.32981	3.63079	3.44852
						169	4.17899	3.1761	3.01872	3.06701
						170	4.39358	3.25964	4.12308	3.24916
						171	3.26652	3.24469	3.23293	3.48782
						172	3.3461	3.0664	3.36195	4.63783
						173	3.17174	3.11595	3.53358	3.00119
						174	6.23654	3.30321	3.47329	3.59453
						175	4.16437	3.25428	3.2036	3.2189
						176	7.52413	3.3744	3.24823	3.21735
						177	6.74852	3.21028	5.53052	3.85025
						178	3.78104	3.5442	5.22988	3.1132
						179	3.94359	3.61306	3.86592	3.5348
						180	5.78002	3.00966	3.32283	3.43373
						181	3.14931	3.22172	3.46532	3.02689
						182	3.06244	5.48805	3.3341	4.46789
						183	3.38975	3.18645	4.04012	3.99343
						184	3.3279	3.13032	3.90291	3.16386
						185	3.64985	3.26825	3.13518	3.24253
						186	3.88271	3.4643	3.17337	3.88374
						187	4.05026	3.04908	3.45952	3.1114
						188	3.29801	4.33721	3.06217	3.5031
						189	3.13558	3.7445	4.04989	4.18766
						190	3.32802	3.53136	3.33922	3.90837
						191	3.17527	4.92673	3.55403	3.32023
						192	3.0833	4.14489	3.01343	3.15272
						193	3.87339	3.61986	3.83261	3.03496
						194	3.53702	3.64465	6.83464	4.02534
						195	4.32399	3.34524	4.48194	3.71456
						196	3.15173	3.24158	3.59062	4.05461
						197	3.0124	3.40272	3.34953	3.48178
						198	4.20006	3.46142	3.70515	3.00293
						199	9.95613	3.83383	3.26525	3.26385
						200	3.00825	3.46256	13.7193	3.82218
						201	3.29208	3.21165	3.04491	3.88438
						202	3.65592	3.48593	3.15127	3.29879
						203	3.25974	3.67675	3.33754	3.29392
						204	3.05972	3.68392	3.16768	3.02572
						205	5.48069	3.69038	3.93353	3.85573
						206	4.04965	9.44782	3.01789	3.36821
						207	6.54676	3.14797	3.05482	3.23988
						208	5.39264	3.66998	3.32076	3.67237
						209	3.0448	3.25001	3.90112	3.41596
						210	3.18167	3.16881	3.3324	3.03836
						211	3.0671	3.09379	3.51344	4.01178
						212	3.10654	3.57569	3.44379	3.42599
						213	7.73859	3.06865	3.15613	3.01031
						214	3.75337	3.33464	3.04137	3.7402
						215	3.50535	3.21618	3.23247	3.09606
						216	4.15713	3.59103	4.28173	3.50204
						217	5.45641	3.51812	4.18157	4.10822
						218	4.17715	4.43227	3.43842	3.34752
						219	3.02023	4.34125	4.26867	4.22571
						220	3.2605	3.11113	3.42503	4.02401
						221	3.4908	3.04563	3.01983	3.33175
						222	3.30127	3.0386	3.07846	3.53742
						223	3.55075	3.26692	3.10405	3.32419
						224	3.09289	3.39	3.06417	3.43492
						225	6.93177	3.25311	3.02325	3.01139
						226	4.4583	3.60719	3.54252	4.06087
						227	4.13597	3.48642	3.50995	3.3088
						228	3.08442	3.30662	3.41487	3.87078
						229	3.32546	4.04291	3.94767	3.03497
						230	3.86174	4.58993	3.57798	4.07425
						231	4.14242	3.67874	3.26596	3.98437
						232	4.68648	3.23186	3.59736	3.46764
						233	3.6786	3.05679	3.42064	3.45883
						234	7.54031	3.50297	3.60508	3.7346
						235	3.242	3.01493	3.14379	3.30365
						236	3.41462	3.39944	3.35315	3.16193
						237	7.72246	3.29193	4.01671	3.60412
						238	4.32886	3.31215	3.26849	4.05352
						239	3.57168	5.80605	3.66917	3.7427
						240	3.9797	3.06429	3.37116	3.14946
						241	6.19917	3.87949	3.33531	3.03216
						242	3.30133	3.45122	3.26938	3.19218
						243	3.24303	3.23013	3.06373	4.19025
						244	3.34444	4.10737	4.42229	3.02211
						245	3.4021	3.82078	3.10633	3.01899
						246	4.62704	3.03209	3.41975	3.36136
						247	3.32113	5.0791	3.9521	3.76064
						248	3.05244	4.49864	3.15632	3.23076
						249	3.04967	3.23136	3.5725	3.10126
						250	3.27198	3.70969	3.23609	3.56778
						251	3.56994	3.61997	3.03447	3.79934
						252	3.01523	3.31981	3.10607	3.04268
						253	3.193	3.43541	3.58316	3.76169
						254	3.55835	3.12798	3.66103	3.05649
						255	3.61998	3.77411	3.58856	3.39727
						256	3.39398	3.48106	3.02193	3.0075
						257	3.17832	3.10771	3.57953	3.92596
						258	4.42525	3.41639	3.44482	3.86814
						259	3.23234	5.15689	3.67303	3.87144
						260	3.87822	3.5127	3.63798
						261	3.04407	4.87194	3.21802
						262	3.77098	4.3471	3.94148
						263	3.88745	4.42335	3.55086
						264	3.50567	3.85361	3.34233
						265	3.1196	4.17855	3.09299
						266	3.3713	3.64787	3.72981
						267	3.01001	3.79326	3.08035
						268	3.07087	3.13907	3.35504
						269	3.41944	3.44729	3.39716
						270	3.08077	3.07853	5.25908
						271	3.88629	3.30267	3.35507
						272	4.29509	3.02744	3.1583
						273	3.2213	3.24333	3.5854
						274	3.06268	3.14194	3.59618
						275	3.66147	3.2374
						276	5.51768	3.80573
						277	3.58823	4.74163
						278	3.12652	4.07267
						279	3.31578	3.652
						280	3.12439	4.49608
						281	3.68428	3.99259
						282	3.82296	3.82314
						283	3.7214	3.02957
						284	4.36697	3.94658
						285	4.40291	3.02618
						286	6.38896	3.85349
						287	3.11008	3.63591
						288	3.99104	3.19932
						289	3.21777	3.26708
						290	3.54031	3.60385
						291	3.61443	3.11578
						292	3.60216	3.91667
						293	3.07764	3.3836
						294	3.32465	3.13413
						295	3.47051	3.56594
						296	3.30696	3.11752
						297	3.44874	4.04196
						298	3.14328	3.68129
						299	3.71374	3.89357
						300	3.08958	3.66977
						301	3.43424	3.84947
						302	3.60566	3.11194
						303	3.21403	3.59541
						304	4.34667	3.7712
						305	3.12283	4.39143
						306	3.32668	3.27136
						307	4.20819	3.50936
						308	3.44682	3.10307
						309	4.51333	3.15284
						310	3.1336	3.44224
						311	3.4762	3.70735
						312	4.12932	3.44364
						313	3.02313	3.05425
						314	4.45536	3.31651
						315	3.30335	3.41611
						316	3.80016	3.20347
						317	4.4541	3.38715
						318	3.50618	3.49709
						319	3.82837	3.21784
						320	3.21552	3.42972
						321	3.36787	3.49015
						322	3.09618	3.62902
						323	3.44196	4.42995
						324	3.45764	3.04227
						325	3.03332	3.14306
						326	3.606	3.15304
						327	4.0691	3.39364
						328	4.06953	4.36539
						329	3.02969	3.78174
						330	3.0396	3.50659
						331	3.54514	3.14094
						332	3.70177	3.77324
						333	3.78033	5.45322
						334	3.29044	3.38716
						335	3.21537	3.46765
						336	3.17348	3.28491
						337	4.20273	3.74888
						338	3.1352	3.18423
						339	3.62154	3.64286
						340	3.49833	3.03553
						341	3.068	3.90399
						342	3.06411	3.05406
						343	3.49377	3.9296
						344	3.3864	3.13792
						345	3.75468	3.42085
						346	5.20122	3.13924
						347	3.70869	4.10882
						348	5.62721	3.9587
						349	3.17094	3.05192
						350	5.81736	3.5126
						351	4.97802	3.2196
						352	3.87569	3.94784
						353	3.53049	4.14546
						354	3.10248	3.62083
						355	3.24846	5.4833
						356	3.09215	4.53657
						357	9.66127	3.76737
						358	4.10935	4.57763
						359	4.40998	6.3942
						360	3.67383	4.1842
						361	3.04442	3.33643
						362	3.52349	3.06441
						363	5.31931	3.46527
						364	4.0847	3.99487
						365	4.82868	4.93216
						366	5.24367	3.20719
						367	3.93351	3.08614
						368	5.3489	3.18453
						369	6.13611	3.48603
						370	3.49913	3.74018
						371	3.54853	3.63344
						372	3.28497	3.10828
						373	3.08425	4.39387
						374	3.69527	4.93524
						375	3.04658	4.53373
						376	3.1297	3.34558
						377	3.2377	3.22036
						378	3.96779	3.59759
						379	3.31414	4.55521
						380	4.17364	3.5301
						381	3.55194	3.6083
						382	6.07412	4.67712
						383	3.58893	3.43683
						384	4.94758	3.63253
						385	6.77194	3.2651
						386	3.07804	3.3061
						387	3.956	3.24784
						388	3.00564	4.51948
						389	3.96697	3.39901
						390	3.03688	3.0591
						391	4.07449	3.74128
						392	3.79155	3.14903
						393	3.43631	5.0021
						394	5.00228	3.26081
						395	3.22977	3.06243
						396	3.73538	4.61197
						397	3.28479	3.54502
						398	3.45628	3.43893
						399	6.72868	3.16115
						400	4.15424	4.51257
						401	4.60592	3.17681
						402	4.47131	4.43732
						403	4.0126	3.07115
						404	6.60518	5.02974
						405	3.72455	4.66323
						406	3.56777	3.62815
						407	5.03374	4.10649
						408	5.7729	3.28659
						409	3.98756	3.40038
						410	3.00384	3.2635
						411	5.33844	4.81589
						412	4.48745	3.33108
						413	3.04004	3.00051
						414	3.39443	3.88426
						415	3.5032	5.01409
						416	3.49129	3.57044
						417	3.56149	3.08876
						418	3.0467	3.32343
						419	3.98655	4.26596
						420	3.39077	4.44917
						421	3.8364	3.64404
						422	3.04457	4.25143
						423	3.59189	3.44969
						424	7.27291	3.89981
						425	3.1225	3.47741
						426	3.00057	3.742
						427	3.71187	4.26453
						428	4.30654	3.77358
						429	4.94406	3.10346
						430	4.37287	3.81508
						431	4.29285	4.75673
						432	3.21337	5.56964
						433	3.37428	3.63738
						434	4.02085	4.56751
						435	3.4152	3.32418
						436	3.43323	3.86165
						437	3.14821	3.24952
						438	4.19298	3.85886
						439	4.24863	3.3095
						440	3.01555	3.02141
						441	3.34441	3.76232
						442	3.05473	5.10457
						443	4.55216	3.61041
						444	3.13714	4.57448
						445	3.94571	3.25085
						446	3.02792	3.18634
						447	3.25733	4.3393
						448	3.41231	3.08269
						449	3.47101	3.07342
						450	3.61863	4.06221
						451	3.85267	3.06463
						452	3.18105	3.40165
						453	3.07965	3.57015
						454	4.44627	3.05388
						455	4.3757	3.18573
						456	3.52699	4.09384
						457	4.73247	3.21178
						458	3.16023	3.25884
						459	4.14394	3.73222
						460	3.60315	3.60294
						461	3.55285	4.12739
						462	3.13994	3.93332
						463	5.19325	3.51863
						464	3.05056	3.54488
						465	3.40704	4.7042
						466	4.08074	3.23446
						467		3.76117
						468		3.5032
						469		4.19838
						470		3.42815
						471		3.48164
						472		3.781
						473		3.59914
						474		3.13898
						475		3.24524
						476		3.21082
						477		3.49947
						478		3.27248
						479		4.72125
						480		3.7593
						481		5.35999
						482		3.48663
						483		4.60034
						484		3.58216
						485		4.00248
						486		3.21289
						487		4.10427
						488		3.29996
						489		3.30886
						490		3.66471
						491		4.41117
						492		4.6075
						493		3.45053
						494		4.10315
						495		3.40602
						496		7.17636
						497		5.63505
						498		4.43151
						499		3.64843
						500		8.14726
						501		3.4691
						502		3.21145
						503		3.16043
						504		3.58664
						505		4.40173
						506		5.56168
						507		3.3252
						508		3.03531
						509		3.8439
						510		4.00177
						511		3.61688
						512		3.7544
						513		3.54283
						514		3.94766
						515		3.68203
						516		3.57447
						517		3.45027
						518		3.80522
						519		3.51368
						520		3.0515
						521		3.57735
						522		5.98322
						523		3.18881
						524		3.02211
						525		3.30357
						526		3.88817
						527		3.79579
						528		4.23223
						529		3.21535
						530		3.58902
						531		4.89016
						532		3.96341
						533		3.9566
						534		4.18354
						535		3.21109
						536		3.39524
						537		3.32687
						538		3.34441
						539		4.39163
						540		3.0778
						541		3.24136
						542		3.24791
						543		4.40632
						544		4.78459
						545		3.32172
						546		3.0914
						547		3.38907
						548		3.48392
						549		3.40086
						550		3.2458
						551		3.97259
						552		3.40748
						553		4.95029
						554		3.85306
						555		3.83655
						556		3.10987
						557		4.93947
						558		3.41474
						559		3.77082
						560		5.80236
						561		3.96854
						562		3.46444
						563		4.83957
						564		3.29613
						565		3.30258
						566		3.11088
						567		3.04307
						568		3.4019
						569		4.63488
						570		4.02272
						571		4.34613
						572		3.82268
						573		4.72925
						574		3.6401
						575		3.83058
						576		5.25126
						577		7.00183
						578		3.07693
						579		3.04749
						580		5.4669
						581		3.00934
						582		3.46153
						583		6.67186
						584		3.37635
						585		3.34284
						586		3.88565
						587		3.94246
						588		3.58385
						589		5.6584
						590		4.48791
						591		3.53929
						592		4.15026
						593		3.31795
						594		3.12207
						595		4.00332
						596		6.91903
						597		6.12343
						598		3.94777
						599		4.72132
						600		4.02137
						601		3.53265
						602		3.66124
						603		3.71337
						604		6.30511
						605		3.66299
						606		3.12105
						607		3.20788
						608		3.11402
						609		4.10201
						610		4.79929
						611		3.09023
						612		3.95804
						613		3.26055
						614		3.82137
						615		4.0263
						616		5.99984
						617		3.22412
						618		3.28905
						619		3.61968
						620		4.69156
						621		3.41822
						622		3.55761
						623		3.28443
						624		3.89757
						625		3.81961
						626		4.29222
						627		3.27674
						628		3.12911
						629		3.90861
						630		4.49208
						631		3.94771
						632		3.9649
						633		4.18343
						634		3.03145
						635		3.22603
						636		4.40044
						637		4.64667
						638		3.37863
						639		6.92681
						640		5.61015
						641		4.60422
						642		3.23551
						643		3.30283
						644		3.02986
						645		3.95846
						646		3.05785
						647		4.89199
						648		5.58476
						649		5.18177
						650		3.70632
						651		4.74874
						652		3.32085
						653		3.08816
						654		5.09814
						655		3.0528
						656		3.56881
						657		4.24728
						658		3.16714
