# Supplementary material for: Excitatory neurotransmission activates compartmentalized calcium transients in Müller glia without affecting lateral process motility
Source: eLife. 2021 Dec 16;10:e73202. doi: 10.7554/eLife.73202 (PMC8806189; doi:10.7554/eLife.73202)
Supplement: Figure 4—source data 1. [file elife-73202-fig4-data1.xlsx]

## Sheet: Figure 4-source data 1
	Proportion ROIs responding per wave (Figure 4B, Table 14)														Fold change in average proportion ROIs responding per wave (Figure 4B, Table 15)										Z scored deltaF/F per wave-associated transient (Figure 4C, Table 16)														Fold change in average proportion ROIs responding per wave (Figure 4C, Table 17)										Intercompartment latency per stalk wave-associated event (Figure 4D, Table 18)
	P9-P10						P11-P12								P9-P10				P11-P12						P9-P10						P11-P12								P9-P10				P11-P12					stalk transient #	ACSF
	ACSF		Gabazine		Gabazine + pirenzepine		ACSF		Gabazine		Gabazine + pirenzepine				ACSF to gabazine		gabazine to pirenzepine		ACSF to gabazine		gabazine to pirenzepine				ACSF		Gabazine		Gabazine + pirenzepine		ACSF		Gabazine		Gabazine + pirenzepine				ACSF to gabazine		gabazine to pirenzepine		ACSF to gabazine		gabazine to pirenzepine			1	2.02703
wave #	stalks	LPs	stalks	LPs	stalks	LPs	stalks	LPs	stalks	LPs	stalks	LPs		FOV #	stalks	LPs	stalks	LPs	stalks	LPs	stalks	LPs		transient #	stalks	LPs	stalks	LPs	stalks	LPs	stalks	LPs	stalks	LPs	stalks	LPs		FOV #	stalks	LPs	stalks	LPs	stalks	LPs	stalks	LPs		2	2.02703
1	0.0353535	0.0444444	0.0656566	0.0311111	0.0972222	0.0666667	0.1125	0.163333	0.463333	0.416667	0.246667	0.266667		1	6.89796	2.90625	0.214484	0.538672	3.67084	2.4797	0.506063	0.7		1	3.26741	3.77077	11.2159	8.66113	3.24253	3.18356	3.83004	3.43875	3.20002	3.69698	4.17037	4.06546		1	1.5185	1.20783	0.51461	0.936453	1.4988	1.06916	0.872008	0.984973		3	1.68919
2	0.0707071	0.0488889	0.363636	0.102222	0.03125	0.0666667	0.06875	0.116667	0.293333	0.26	0.106667	0.196667		2	12.5546	4.84638	0.308648	0.86689	13.5641	6.7	0.391383	0.799751		2	3.03704	3.89011	6.22561	6.68672	3.16728	5.05442	4.15936	5.06674	3.08203	3.69069	3.2775	4.07326		2	2.13069	1.25834	0.613971	1.00455	1.55923	0.891063	0.665675	1.00389		4	2.02703
3	0.0454545	0.0577778	0.494949	0.213333	0.0451389	0.0633333	0.078125	0.08	0.37	0.376667	0.08	0.14		3	5.36092	1.64347	0.195241	0.689952	6.94005	6.07238	0.292704	0.912798		3	4.04409	4.31054	6.50755	3.87054	3.57085	3.22665	3.92936	3.40461	5.35543	6.90629	3.91174	3.3522		3	2.25101	1.0846	0.504844	0.918071	1.80045	1.14477	0.512096	0.994688		5	1.01351
4	0.040404	0.0888889	0.631313	0.417778	0.0351906	0.0833333	0.071875	0.15	0.256667	0.25	0.0833333	0.15		4	5.69656	2.01754	0.512722	0.651667	2.45313	1.32664	0.29467	0.624022		4	8.80939	3.34688	9.39958	4.77847	3.26905	3.63409	3.18759	3.22033	4.68414	4.44541	3.98467	4.60778		4	1.79519	1.05121	0.474073	0.633538	1.44027	1.16491	0.548132	0.899701		6	-0.337838
5	0.0555556	0.0444444	0.151515	0.0622222	0.0498534	0.113333	0.071875	0.09	0.0766667	0.19	0.019802	0.251429		5	5.7162	1.60092	0.334493	0.709528	2.11033	2.17484	0.64165	0.588185		5	3.04821	4.0655	8.28589	3.47937	8.31212	3.10398	3.73007	3.08121	3.04464	5.23358	8.55048	3.86112		5	1.95097	1.09228	0.544807	0.947222	1.24062	1.0585	0.842859	0.96137		7	1.35135
6	0.0315789	0.0666667	0.307018	0.106667	0.0615836	0.0466667	0.109375	0.16	0.186667	0.233333	0.0594059	0.268571		6	12.4042	9.375	0.25759	0.631679	5.94846	4.48636	0.611839	0.948377		6	3.27714	3.12997	10.1734	7.92225	3.55735	3.44808	3.12	4.2939	7.01754	3.96198	10.3643	3.50536		6	2.35897	1.90662	0.513651	0.901464	1.22886	1.10579	0.835288	1.00286		8	1.68919
7	0.0526316	0.0266667	0.385965	0.133333	0.0293255	0.06	0.0875	0.06	0.14	0.156667	0.0990099	0.234286		7	6.77553	4.02046	0.210778	0.431592						7	3.77157	3.39118	5.70375	3.42362	3.02657	3.24854	4.82238	3.1144	3.37399	4.09719	3.35746	3.06754		7	1.96719	1.09851	0.631676	0.950025						9	2.02703
8	0.0210526	0.0666667	0.307018	0.0666667	0.0351906	0.0866667	0.059375	0.0966667	0.0491803	0.0971429	0.0742574	0.234286		8	3.61331	2.13753								8	4.9015	3.16772	4.11801	4.68761	3.10485	3.05311	4.61364	5.45319	3.67131	3.07836	3.49094	3.3319		8	2.02289	1.05934								10	2.02703
9	0.0590278	0.0966667	0.377193	0.126667	0.0234604	0.0533333	0.075	0.123333	0.125683	0.188571	0.0445545	0.0914286		9	3.72216	2.70173								9	5.33377	3.08012	8.25372	3.19912	3.05812	3.71224	3.35141	3.65348	14.0726	4.26442	3.30713	5.04704		9	1.52893	1.0657								11	1.68919
10	0.0416667	0.07	0.298246	0.106667	0.0322581	0.0666667	0.05625	0.0766667	0.0218579	0.0285714	0.0445545	0.0971429												10	12.3686	3.20436	8.89822	3.18796	3.21623	4.2689	3.95017	6.74726	3.50718	4.10444	3.03127	3.1088												12	1.35135
11	0.03125	0.0933333	0.234501	0.18	0.24569	0.577778	0.040625	0.16	0.0218579	0.0228571	0.0544554	0.131429												11	3.00811	3.21099	10.7725	3.36203	3.93392	3.81722	3.35425	3.72486	12.0408	3.33187	3.47306	3.74672												13	1.68919
12	0.0347222	0.0766667	0.22372	0.186667	0.0490798	0.106667	0.103125	0.12	0.125683	0.0742857	0.0445545	0.194286												12	3.1513	3.63513	3.02298	3.75435	3.99489	3.39981	3.28426	4.15743	3.14509	4.16196	3.40109	3.33192												14	1.35135
13	0.0240385	0.0533333	0.185984	0.216667	0.110429	0.333333	0.04375	0.08	0.0382514	0.0685714	0.13012	0.476667												13	3.72265	3.13013	4.87529	3.06369	3.17203	3.5122	3.14212	4.10355	3.25013	4.26861	3.09411	4.36767												15	1.68919
14	0.0336538	0.0566667	0.115	0.0833333	0.104294	0.248889	0.084375	0.0933333	0.010929	0.0857143	0.13494	0.406667												14	3.34052	3.77863	3.69958	4.38351	7.17366	3.28044	3.73451	3.45507	9.34076	3.00089	3.3229	3.58638												16	1.35135
15	0.0192308	0.0333333	0.27	0.1	0.130319	0.27	0.03125	0.08	0.180328	0.2	0.115663	0.503333												15	5.07882	4.24981	10.4051	3.6619	7.2373	3.50316	3.56636	3.7012	3.96036	3.35159	3.69207	6.02691												17	1.68919
16	0.0240385	0.0466667	0.45339	0.968889	0.12766	0.31	0.05625	0.113333	0.136612	0.137143	0.144578	0.553333												16	3.05418	3.78438	7.02554	3.18469	3.65945	3.75062	3.73028	3.34024	3.41636	3.62953	3.02053	3.6439												18	1.35135
17	0.0432692	0.03	0.351515	0.395556	0.0930851	0.19	0.08125	0.126667	0.0437158	0.0685714	0.121387	0.273333												17	3.13566	4.43805	10.6551	3.02731	4.29377	3.20747	14.0449	3.60794	5.64149	3.25327	3.12179	4.4504												19	1.35135
18	0.0432692	0.0566667	0.0666667	0.0888889	0.119681	0.333333	0.05	0.0766667	0.010929	0.04	0.153179	0.263333												18	3.744	3.08587	4.03576	3.52498	6.65978	4.47779	3.03149	3.63786	8.28598	8.337	4.31473	3.09848												20	1.35135
19	0.0288462	0.0533333	0.272727	0.342222	0.0639731	0.1	0.046875	0.126667	0.16545	0.25	0.0982659	0.38												19	3.2027	3.19139	7.7935	3.21985	10.3575	3.73758	3.58363	3.7778	6.176	6.24848	6.78743	3.03358												21	1.35135
20	0.0730769	0.124444	0.423181	0.43	0.03367	0.09	0.0625	0.0766667	0.615572	0.663333	0.141618	0.456667												20	3.01196	4.51332	9.1368	3.07934	3.23819	3.87974	3.13558	3.02197	6.78705	3.26928	3.19562	3.13836												22	1.01351
21	0.0230769	0.0711111	0.498652	0.44	0.0493827	0.08	0.00546448	0.0514286	0.540146	0.6	0.0809249	0.24												21	3.04447	3.36449	5.25412	4.47566	3.52983	3.62864	3.38395	3.89031	6.19048	4.23273	3.17038	3.40727												23	1.01351
22	0.0230769	0.0888889	0.455526	0.436667	0.0339506	0.0466667	0.010929	0.0171429	0.484185	0.596667	0.0606936	0.136667												22	5.26785	3.40235	8.03517	4.22678	3.33677	3.7115	3.07959	3.1563	11.5371	3.21827	3.72116	4.2313												24	1.35135
23	0.040404	0.0514286	0.450135	0.44	0.0339506	0.0633333	0.0668258	0.0766667	0.437956	0.546667	0.0578035	0.116667												23	6.30409	3.08299	4.23071	3.32729	3.49597	3.49303	3.61418	3.77491	3.03187	3.53805	4.20554	3.23605												25	1.35135
24	0.040404	0.0914286	0.42	0.246667	0.037037	0.0933333	0.097852	0.116667	0.182109	0.216667	0.0780347	0.183333												24	3.43367	3.12175	9.00175	4.0456	4.02955	3.52606	5.48976	3.20144	5.06143	5.57118	3.57131	3.24035												26	1.01351
25	0.13354	0.286667	0.54	0.293333	0.0432099	0.0633333	0.0501193	0.0833333	0.0638978	0.22	0.0924855	0.223333												25	3.57834	4.48444	8.47908	5.51995	3.72386	3.66598	3.69341	4.30503	12.0184	3.26355	3.09061	4.64606												27	1.01351
26	0.161491	0.246667	0.47	0.253333	0.0709877	0.103333	0.0670927	0.13	0.0365854	0.0685714	0.0518135	0.257143												26	4.8454	3.37005	7.72083	3.94634	4.59223	4.85028	4.41323	3.08209	3.3811	4.33063	3.04594	5.10601												28	0.675676
27	0.0993789	0.186667	0.52	0.346667	0.260504	0.551111	0.111821	0.376667	0.134146	0.382857	0.0673575	0.24												27	6.24015	3.10674	6.85735	5.12479	3.65585	3.17776	4.19155	3.10357	3.37139	3.10744	3.28305	5.10324												29	1.35135
28	0.139752	0.2	0.49	0.346667	0.252101	0.608889	0.0670927	0.26	0.115854	0.314286	0.0414508	0.177143												28	3.07688	4.3926	11.1293	3.68034	3.02078	3.36464	3.1651	3.24712	7.57691	4.18072	4.02376	3.35939												30	0.675676
29	0.139752	0.176667	0.178694	0.106667	0.119318	0.302222	0.0447284	0.0833333	0.237805	0.52	0.015544	0.205714												29	12.0747	3.43347	4.19381	3.20292	3.3436	3.85274	3.93496	3.17573	6.72473	4.13223	3.71648	3.58794												31	1.35135
30	0.111801	0.146667	0.292096	0.133333	0.107955	0.275556	0.0830671	0.26	0.176829	0.428571	0.0310881	0.108571												30	5.51619	3.07451	6.06229	6.29616	11.4525	3.22598	3.10741	3.14518	5.62839	4.39279	3.11864	4.80045												32	2.02703
31	0.0993789	0.186667	0.195876	0.04	0.0511364	0.142222	0.108626	0.276667	0.0609756	0.302857	0.0207254	0.0742857												31	3.23185	5.4299	7.78914	3.24261	3.29168	3.33872	4.40691	3.41214	8.96671	3.6688	3.06112	3.07111												33	1.68919
32	0.0212766	0.04	0.13	0.06	0.107955	0.142222	0.0447284	0.126667	0.182927	0.462857	0.0207254	0.0914286												32	3.00051	4.04344	7.54079	3.22402	3.18487	3.51647	3.23754	3.25928	3.80779	3.60334	3.19923	3.15247												34	1.68919
33	0.0319149	0.06	0.2	0.0766667	0.130682	0.306667	0.115016	0.243333	0.0914634	0.331429	0.0259067	0.0971429												33	3.96382	3.76792	4.91082	3.09775	3.49135	4.12916	3.00861	3.37463	4.59573	3.06509	3.1362	4.15498												35	1.68919
34	0.0425532	0.0333333	0.19	0.0866667	0.113636	0.24	0.0766773	0.133333	0.097561	0.291429	0.182927	0.643333												34	3.05365	3.66781	8.24322	5.49863	10.6574	4.13741	10.7623	3.37813	4.51332	3.04343	18.0045	3.90488												36	1.68919
35	0.0212766	0.02	0.095	0.0633333	0.0531178	0.0566667	0.0351438	0.07	0.182927	0.331429	0.104878	0.14												35	3.54187	3.30567	3.97387	3.47881	3.52283	4.14414	4.07543	4.17268	4.79024	3.43432	3.62977	3.36137												37	0.675676
36	0.0531915	0.0333333	0.16	0.133333	0.0600462	0.136667	0.0894569	0.246667	0.200924	0.716667	0.12439	0.676667												36	3.55845	4.11111	6.42131	6.24241	3.36346	3.21585	3.82754	3.42103	3.81909	3.01111	8.8283	4.37332												38	1.01351
37	0.0212766	0.0266667	0.105	0.11	0.0415704	0.0966667	0.086262	0.273333	0.517321	0.93	0.136585	0.666667												37	3.08352	4.64124	3.66153	3.43704	4.18065	3.35288	4.05061	3.93798	10.0279	4.12385	3.45965	3.06463												39	0.506757
38	0.0425532	0.04	0.24	0.116667	0.0946882	0.136667	0.086262	0.15	0.568129	0.873333	0.0495627	0.283333												38	3.82477	3.71751	6.94862	3.38772	3.42298	5.19515	3.37375	4.23849	6.51532	4.48568	3.34474	3.68159												40	-0.168919
39	0.0212766	0.0466667	0.165	0.0933333	0.0554273	0.0866667	0.111821	0.316667	0.600462	0.93	0.0787172	0.373333												39	6.0077	3.07044	8.4527	3.01949	3.38037	3.47278	3.0665	3.55759	12.104	4.37616	5.01781	4.75911												41	1.01351
40	0.0485075	0.09	0.429825	0.951111	0.0276923	0.0633333	0.0734824	0.156667	0.441109	0.81	0.134111	0.556667												40	3.02565	3.14976	9.20922	3.10105	3.91658	3.22138	3.04603	3.98452	7.80482	4.63861	3.04552	3.47187												42	-0.675676
41	0.0373134	0.0933333	0.227545	0.328889	0.0246154	0.0433333	0.0383387	0.186667	0.266026	0.57	0.090379	0.373333												41	3.42917	3.07531	8.91651	3.63738	3.00467	3.15138	3.05905	3.55367	7.32901	4.22868	3.37322	3.25866												43	0
42	0.0373134	0.0766667	0.311377	0.44	0.0266272	0.0466667	0.0766773	0.1	0.137821	0.486667	0.0699708	0.366667												42	3.24359	3.41464	5.55792	3.10397	3.69734	3.09992	3.20236	4.09519	8.70247	3.90681	3.06388	3.72049												44	0.675676
43	0.0485075	0.0733333	0.251497	0.431111	0.035503	0.09	0.0543131	0.15	0.0705128	0.226667	0.0816327	0.283333												43	11.6435	3.44291	7.45882	3.45602	3.93709	4.59493	4.0768	3.67734	4.38946	3.32599	6.12088	4.23525												45	0.675676
44	0.0223881	0.0733333	0.0898204	0.253333	0.0177515	0.0533333	0.0447284	0.186667	0.205128	0.583333	0.104956	0.506667												44	3.71358	3.20438	7.64558	3.61962	3.1733	3.45802	3.34207	3.11943	5.95424	3.62949	3.21706	4.76279												46	0.675676
45	0.0485075	0.09	0.257485	0.657778	0.0236686	0.07	0.086262	0.366667	0.147436	0.55	0.0816327	0.413333												45	3.2796	3.79705	11.8832	3.13187	6.78037	4.21158	4.31407	3.3223	6.61044	5.17251	3.0763	3.78068												47	1.85811
46	0.01	0.0433333	0.423358	0.34	0.0930233	0.408889	0.0223642	0.0533333	0.198718	0.5	0.0758017	0.406667												46	3.27415	3.65991	7.70351	3.36046	3.00712	3.21723	4.08481	4.41432	6.35714	4.7604	3.54357	4.43821												48	1.85811
47	0.035	0.0466667	0.388686	0.266667	0.0988372	0.293333	0.0437956	0.0733333	0.211538	0.623333	0.116618	0.416667												47	3.2654	3.7513	7.51389	3.91528	3.41273	3.67337	3.22702	4.50036	10.6694	3.57009	3.40772	3.7751												49	0.168919
48	0.02	0.04	0.416058	0.313333	0.0988372	0.311111	0.0238095	0.0666667	0.147436	0.456667	0.139942	0.596667												48	5.35111	3.27635	9.23245	4.48022	12.6731	4.41421	3.09411	3.10102	4.77776	3.81963	3.1431	3.70962												50	-0.168919
49	0.015	0.0366667	0.346715	0.3	0.0565476	0.12	0	0.266667	0.25641	0.76	0.12828	0.45												49	3.35751	4.26544	7.91343	5.47298	4.24996	3.49006	3.33418	4.52049	4.8631	3.04152	3.79923	3.05952												51	1.52027
50	0.0424242	0.08	0.251825	0.176667	0.0327381	0.0766667	0.047619	0.266667	0.128205	0.436667	0.102041	0.463333												50	3.01761	3.09713	4.95005	3.78128	3.9274	3.26946	3.0732	3.42908	12.8965	3.75392	6.35968	3.27966												52	0.506757
51	0.0242424	0.0488889	0.131387	0.116667	0.0386905	0.0333333	0.0952381	0.0444444	0.163462	0.566667	0.0816327	0.466667												51	3.05731	3.62522	5.265	3.56841	4.41288	3.36447	3.44597	3.24977	3.71032	4.07897	6.49431	3.74564												53	1.01351
52	0.0727273	0.164444	0.304745	0.226667	0.0267857	0.04	0.047619	0.0666667	0.211538	0.73	0.026738	0.342857												52	3.06179	3.51228	9.67644	3.7595	3.02284	4.06587	3.15197	4.10209	3.33574	3.09513	4.92949	4.81555												54	0
53	0.030303	0.106667	0.268248	0.21	0.0327381	0.07	0	0.2	0.0897436	0.316667	0.0320856	0.12												53	3.38955	3.08941	7.36904	4.97669	3.57211	3.59775	3.40077	3.81298	5.71642	5.60164	3.88774	3.2041												55	0.675676
54	0.0545455	0.0933333	0.222222	0.126667	0.0565476	0.0866667	0	0.0222222	0.0224359	0.0366667	0.0374332	0.188571												54	9.24137	3.0434	8.61743	5.91663	4.8914	3.16698	4.04994	3.61564	3.31588	4.26588	3.4602	3.39835												56	-1.18243
55	0.0691145	0.0966667	0.190972	0.0566667			0.0238095	0.111111	0.13141	0.44	0.0588235	0.268571												55	3.42939	3.2738	7.59541	6.0171	3.31745	3.41895	3.5002	3.47994	3.75625	3.0095	18.6252	4.12087												57	0.844595
56	0.0583153	0.0933333	0.167164	0.1			0.0238095	0.155556	0.163462	0.423333														56	3.51381	5.00542	10.5623	3.64354	3.05116	3.81498	3.4153	3.15338	3.21319	4.43055	9.11648	3.36131												58	1.85811
57	0.0734341	0.11	0.328358	0.133333			0.0238095	0.111111	0.230769	0.53														57	3.94273	3.1329	5.50469	3.00005	4.17541	3.65534	3.13245	3.33691	3.28848	4.32174	3.48764	3.9132												59	-1.85811
58	0.0842333	0.0933333	0.104478	0.04			0.244382	0.733333	0.144231	0.333333														58	4.60425	3.20542	6.10764	4.07305	3.22419	3.49717	3.16497	3.96844	8.73365	3.45569	3.04931	3.51214												60	0.168919
59	0.0885529	0.08	0.0597015	0.0666667			0.0212766	0.111111	0.0961538	0.25														59	4.04548	3.19135	5.85067	4.64758	3.71775	3.77231	3.6153	3.49371	8.63114	3.07795	10.8563	3.45495												61	-0.168919
60	0.0993521	0.11	0.125373	0.09			0.0851064	0.155556	0.112179	0.35														60	4.03895	3.38846	7.20922	4.71696	3.59693	3.78632	3.03998	3.1361	8.84102	3.70059	3.83974	3.71912												62	-0.168919
61	0.0516129	0.0766667	0.167164	0.0966667			0.0212766	0	0.201923	0.413333														61	3.28006	3.26019	9.98915	4.06989	3.59523	3.28731	4.40198	4.29794	4.87469	4.66273	3.79864	3.52671												63	0.844595
62	0.0451613	0.0566667	0.161194	0.103333			0.0212766	0.0222222	0.0929487	0.286667														62	3.92705	3.42262	3.35988	3.92555	3.23128	3.35081	3.64823	4.38879	8.60892	3.22384	3.30235	3.23005												64	0.168919
63	0.0387097	0.05	0.167164	0.08			0.0638298	0.0888889	0.0384615	0.188571														63	3.21222	3.49853	7.05874	3.7178	3.07023	3.70973	3.07327	3.28354	3.06397	3.81757	4.31573	3.03711												65	0.168919
64	0.0290323	0.0666667	0.101493	0.0933333			0	0.0888889	0.142857	0.274286														64	3.27247	3.86303	9.93034	6.43334	3.56801	3.58804	3.1894	3.2468	3.39043	3.64839	4.57637	3.78952												66	-0.506757
65	0.0483871	0.1	0.595745	0.746667			0.0212766	0.0888889	0.137363	0.325714														65	3.5452	3.23919	6.29516	4.90659	4.00857	5.0794	3.99489	4.32121	3.00476	4.51922	3.06762	4.49002												67	-1.85811
66	0.0354839	0.12	0.391566	0.417778			0.0212766	0.0222222	0.373626	0.52														66	3.12283	3.11278	6.25947	3.05193	4.06673	4.04005	3.45571	3.6052	7.02873	3.41394	5.62805	3.41978												68	-0.168919
67	0.0258065	0.05	0.210843	0.351111			0.0212766	0	0.115385	0.337143														67	3.65452	3.09722	3.64631	3.78975	3.02383	4.15948	3.31706	3.03609	6.50448	3.35477	4.69663	4.26016												69	0.168919
68	0.01	0.03	0.451807	0.462222			0	0.0222222	0.164835	0.394286														68	3.30492	3.24997	10.9498	7.17439	3.91663	3.01043	4.30434	3.52983	6.58366	3.03396	3.59268	3.27732												70	0
69	0	0.0333333	0.36747	0.342222			0.168182	0.566667	0.236264	0.554286														69	3.46795	3.47815	8.33156	3.01505	3.64598	4.65689	4.05884	5.46123	7.65759	3.08228	3.03402	4.88084												71	0
70	0.03	0.0433333	0.347249	0.323333			0.156818	0.626667	0.0604396	0.217143														70	3.68161	3.00367	5.3414	3.04968	3.34261	3.46369	3.10085	3.62247	3.16491	4.36379	3.72346	4.84337												72	0
71	0.015	0.03	0.256167	0.266667			0.0238095	0.177778	0.214286	0.291429														71	3.03539	4.23882	9.84811	3.35739	3.80159	3.11163	3.33319	4.07338	3.05204	3.4269	3.45264	3.48811												73	0
72	0.0919118	0.0932642	0.0474383	0.0766667			0.0238095	0.0666667	0.0857143	0.0971429														72	3.23212	3.28985	13.5955	3.53762	3.4089	3.48615	3.37476	3.29868	11.4835	3.59106	3.9001	3.31052												74	1.52027
73	0.0735294	0.0777202	0.0753012	0.113333			0	0.0444444	0.0342857	0.108571														73	3.56155	3.13269	5.88391	3.26954	3.12549	3.26063	3.27525	3.54945	7.62912	4.05629	14.031	3.9639												75	2.19595
74	0.0698529	0.0725389	0.0813253	0.07			0	0.177778	0.0342857	0.0971429														74	3.52226	3.06531	8.73054	5.33498	3.49288	4.59298	3.91284	4.16846	9.77565	5.04034	3.11191	3.55538												76	2.02703
75	0.0680147	0.074266	0.0361446	0.07			0.0714286	0.2	0.0742857	0.0342857														75	3.22766	3.33287	7.12075	3.22792	3.25791	3.7796	3.08784	3.26703	4.24665	3.58244	3.12381	3.74149												77	0
76	0.0882353	0.08981	0.253012	0.0933333			0	0.0222222	0.0971429	0.154286														76	3.04242	3.16103	4.81141	5.69988	3.47781	3.93651	10.6687	4.33997	5.08473	4.28874	3.60374	4.3816												78	2.36486
77	0.0680147	0.0656304	0.0753012	0.08																				77	3.09047	3.37061	11.636	3.07116	3.08502	3.26765	3.48698	3.62426	8.11653	4.4641	3.77117	4.44605												79	0
78	0.025788	0.0533333	0.120482	0.08																				78	3.11772	3.1207	3.9958	4.08606	4.76458	4.70217	3.05234	4.68938	7.00243	3.01395	3.2263	3.87021												80
79	0.017192	0.08	0.0692771	0.0666667																				79	3.01863	5.53142	6.84777	3.75146	3.86918	3.14396	4.06079	4.09961	7.06775	4.97618	4.00733	3.54685												81
80	0.0544413	0.07	0.114458	0.0633333																				80	3.02189	3.3802	3.58025	5.35182	3.38943	3.0373	3.6515	3.15337	7.2619	4.91102	4.38792	4.33967												82
81	0.034384	0.0966667	0.417178	0.253333																				81	3.19647	3.44829	7.25444	3.05372	3.12504	3.16931	3.85688	3.03414	4.43195	3.14748	3.20408	7.25189												83
82	0.0401146	0.08	0.466258	0.351111																				82	3.68132	3.84972	8.59118	3.56992	3.63939	4.01819	4.67453	3.18296	5.69258	4.51119	4.34463	3.36204												84
83	0.0315186	0.04	0.0316092	0.0633333																				83	3.80213	3.63222	6.80233	4.32601	3.28045	3.19584	3.06731	3.06741	7.46416	3.46535	3.10154	3.48673												85
84	0.0114613	0.05	0.0603448	0.08																				84	3.52648	3.56374	3.06819	3.7854	3.18435	4.12365	3.45707	3.84468	6.17275	3.43085	3.47886	3.47042												86
85	0.0401146	0.0566667	0.103448	0.1																				85	3.10928	3.2428	3.84886	3.16503	3.01135	3.06095	4.0996	3.5615	6.23035	3.36707	3.12581	4.96206												87
86	0.025788	0.0733333	0.0632184	0.07																				86	3.06509	3.71679	3.0314	3.9232	4.26293	4.05537	5.50517	6.56637	8.20543	3.1485	3.29066	4.06242												88
87	0.0229226	0.04	0.0948276	0.05																				87	3.53102	3.12212	3.06858	3.15949	3.9937	4.24243	7.42746	3.62399	3.13399	4.69689	10.6236	3.5711												89
88	0.034384	0.0433333	0.186047	0.103333																				88	3.81123	3.23123	3.89043	3.13646	3.42969	3.29284	3.99044	6.64188	6.01802	4.15811	3.2985	3.11549												90
89	0.0229226	0.0866667	0.159884	0.103333																				89	4.11006	4.30993	4.4843	3.18767	4.17492	4.01175	3.59801	3.88112	3.76845	3.99141	4.60336	3.34558												91
90	0.034384	0.05	0.142442	0.0766667																				90	4.70331	3.5649	4.92007	3.76988	3.13806	3.36609	6.58161	3.58469	3.43857	6.19912	3.39356	5.29172												92
91	0.0229226	0.0466667	0.0843023	0.0566667																				91	3.07284	3.00482	5.48495	3.36779	3.12083	4.32043	3.16924	3.86695	7.15776	5.28215	3.28323	4.68363												93
92	0.025788	0.05	0.234234	0.196667																				92	3.29291	3.04011	7.08767	3.38777	4.91224	3.76076	3.22807	3.2521	8.90574	3.17801	3.68719	5.25104												94
93	0.0393939	0.0533333	0.228228	0.1																				93	3.46476	3.19442	6.79065	3.9149	3.67597	4.29928	3.28234	3.12065	4.42131	3.7348	3.2145	3.38292												95
94	0.0424242	0.0633333	0.231231	0.103333																				94	3.29432	3.11945	6.08929	4.36802	3.17764	3.10552	3.68006	3.33545	3.49219	3.06834	3.23944	5.66727												96
95	0.0424242	0.08	0.135135	0.0833333																				95	3.99815	4.0547	7.96125	5.62824	3.45286	3.15376	3.54311	3.37737	12.1687	3.57096	19.307	5.22842												97
96	0.0242424	0.06	0.201201	0.07																				96	3.01594	3.4258	3.56577	4.965	3.31847	3.16047	4.1396	4.23474	5.32499	3.32941	3.78539	3.89165												98
97	0.030303	0.07	0.048048	0.0666667																				97	3.30105	3.37223	7.94796	5.31633	3.69531	3.27804	3.63661	3.25305	3.95899	3.64873	3.12517	3.35411												99
98			0.168168	0.0766667																				98	3.31039	3.76927	8.91587	8.9707	5.53541	3.2519	3.99225	3.19565	8.34967	3.43797	3.42248	4.42873												100
																								99	3.72232	3.41711	4.61307	3.45408	4.13496	4.32593	3.50549	3.4314	9.85062	5.61338	3.36895	4.05107												101
																								100	3.25423	3.06923	6.52792	3.40391	3.42955	4.03457	3.1747	4.6676	8.14114	5.32231	3.33802	3.03694												102
																								101	3.51017	4.89698	6.24251	3.92282	3.34864	5.85111	3.4526	3.58153	5.50423	3.09981	3.21513	3.01185												103
																								102	3.05134	3.35287	9.32921	8.12768	3.13727	3.83657	3.25972	3.11528	5.81145	3.06258	3.14587	4.14962												104
																								103	3.11705	3.61699	6.64213	3.98896	3.04962	3.67291	3.85844	3.35032	7.53425	3.33795	10.5847	3.05307												105
																								104	3.71041	3.65015	8.088	4.0426	3.89836	3.31633	3.65992	3.53275	3.41697	3.79934	3.33354	3.78427												106
																								105	3.61253	3.00606	7.25845	3.02611	3.29491	3.00827	3.4943	3.23055	3.15234	3.61809	6.26885	3.86381												107
																								106	3.15258	3.03859	6.78688	3.65252	4.02077	3.02419	3.13961	3.05822	3.11247	4.16386	3.49611	3.09953												108
																								107	5.34272	4.55846	9.49991	4.4327	3.04026	3.71106	3.44967	3.32	3.60826	3.7501	3.63691	3.16234												109
																								108	3.10919	3.30215	11.0573	3.50022	3.1918	3.15881	3.29123	3.09144	3.35484	3.45975	3.70985	3.09192												110
																								109	4.00975	3.64954	4.48228	5.01589	3.70878	3.21509	4.05751	3.46284	13.0428	3.00965	3.96911	3.67511												111
																								110	3.88438	4.44066	4.49962	3.20946	3.28113	3.23702	3.43254	3.08676	7.16771	3.53745	4.24184	4.08548												112
																								111	4.89894	3.60712	5.13584	3.51398	4.48383	4.24374	3.82062	3.3403	5.44346	3.43915	3.543	3.63716												113
																								112	3.3307	3.91141	6.65397	4.02715	3.0933	3.64191	4.05092	3.11311	3.56931	3.06757	6.43893	3.5224												114
																								113	4.28889	3.64184	9.09737	3.04476	3.00496	3.17291	3.32208	3.18679	3.54044	3.36138	3.85748	4.28055												115
																								114	3.09561	4.17604	5.09075	4.13068	3.47333	3.32755	4.25073	3.46709	4.07798	3.09306	3.50604	3.65596												116
																								115	3.03675	3.67855	8.7919	4.97719	9.34131	3.06269	3.34431	3.29968	3.44747	4.27462	3.00516	5.71849												117
																								116	3.22603	3.08813	3.48152	3.58296	3.34682	3.96001	3.9384	4.02076	8.64146	3.11583	3.24529	3.3019												118
																								117	3.79156	3.86375	3.83932	4.00829	3.09196	3.127	4.01433	3.2854	4.21277	5.07139	3.57074	4.94754												119
																								118	4.77916	3.45773	7.56839	6.36619	4.34004	3.01352	3.22374	3.9909	9.43483	4.55619	3.34018	3.35852												120
																								119	3.07679	3.43749	5.38625	3.35273	3.12149	3.51778	3.69473	3.14658	7.88626	7.52145	5.37502	3.45068												121
																								120	3.03978	3.40261	4.40396	4.89637	3.3849	3.03342	3.45144	3.17781	9.7239	3.30004	3.09721	4.81114												122
																								121	3.85609	3.10228	6.76257	3.81412	3.32141	3.56849	3.10841	3.87235	5.27862	4.45777	3.70567	3.02008												123
																								122	3.23108	3.21746	11.7967	7.15958	3.45582	3.20386	3.0377	3.5013	3.06051	4.26411	3.03649	3.46774												124
																								123	3.04255	3.02905	3.97603	3.42552	3.82706	3.04852	3.14314	4.31427	9.40231	3.95246	3.6508	4.88661												125
																								124	3.58019	3.01275	5.62429	3.10674	3.96855	3.49872	3.3323	3.55981	7.2757	3.28891	6.62193	3.14222												126
																								125	3.74661	3.37673	8.64993	3.74272	3.66585	3.01324	3.31355	5.60419	3.34706	3.80936	13.0077	3.20274												127
																								126	3.22525	4.73885	7.90344	3.38484	3.96362	6.19618	3.03718	3.87238	3.20257	4.68697	3.11069	4.60821												128
																								127	3.18559	3.07894	4.44506	3.8418	3.19939	4.1191	4.56216	5.96584	3.06319	3.45352	14.0762	3.42114												129
																								128	3.5623	4.16744	6.96515	3.32953	5.51286	3.1279	3.27473	4.0469	3.45423	3.23969	15.8336	3.586												130
																								129	3.43956	3.17771	6.76707	3.5872	12.0411	3.09989	3.21505	3.08811	7.19815	3.59677	3.40446	3.94594												131
																								130	4.09511	3.37951	14.0344	3.0035	6.3972	4.26552	3.40539	3.28076	3.15234	3.5711	9.58402	3.08122												132
																								131	3.17223	3.03697	6.8478	3.22713	3.34131	3.64777	4.64758	3.44657	6.319	4.56758	4.24253	3.73398												133
																								132	4.07589	3.37201	11.4651	6.31207	3.35435	4.24289	3.10047	3.30038	7.36001	3.7339	3.83243	4.92867												134
																								133	3.08529	3.2192	4.94719	3.47272	3.10669	3.10269	3.04257	4.79532	5.56125	5.37194	3.06144	5.27844												135
																								134	3.00191	3.39333	3.65354	10.3911	3.3817	3.64152	4.46289	5.44438	9.73077	3.06706	3.39466	4.71122												136
																								135	3.93726	3.09204	3.64045	5.44615	3.18531	3.26222	3.01589	3.33623	8.413	3.28353	7.71824	3.33889												137
																								136	3.57539	3.73147	6.38232	3.37879	6.73943	3.63663	5.05186	3.34632	9.38319	4.21351	3.65765	3.12008												138
																								137	3.18038	3.24008	8.50817	4.19162	3.08556	3.2928	4.75128	3.14573	6.37349	3.53053	3.27181	4.81262												139
																								138	3.06132	3.60717	10.0954	6.23238	3.0723	3.43018	3.13531	4.2128	3.35559	3.40355	5.36696	4.51169												140
																								139	3.43922	3.97423	7.95683	5.52451	3.20313	3.02646	3.41186	3.33531	3.54705	3.07936	3.21411	5.5937												141
																								140	3.01332	3.36695	3.38817	3.14485	3.71379	4.02099	3.04519	6.403	14.1659	6.32738	4.06942	5.79339												142
																								141	3.00189	3.42433	3.24607	3.61715	3.26196	4.48099	3.79867	4.15673	4.09204	4.02801	3.27692	3.20291												143
																								142	3.44866	4.25173	8.33103	8.48862	3.09417	4.74708	3.4151	3.70326	7.84519	5.20598	3.03637	3.68052												144
																								143	3.23015	4.13896	4.27109	3.3875	4.54897	3.72865	3.42504	4.42094	6.41952	3.04583	3.14676	5.13242												145
																								144	3.14761	3.50575	6.23677	5.96378	5.58539	3.1419	3.2437	3.29295	4.93	3.13077	17.8914	4.86456												146
																								145	3.65754	3.94242	11.6297	3.0502	3.22407	3.35917	3.38304	3.30711	3.23366	4.15415	8.80425	3.1219												147
																								146	3.21465	3.87763	5.65176	4.9793	3.88074	3.38515	3.306	3.54642	7.18807	4.09439	3.0598	3.45684												148
																								147	3.35847	3.34809	7.67812	8.32694	3.75876	4.69892	3.26336	3.34845	4.31885	3.89521	12.1137	4.13875												149
																								148	3.3524	3.84063	3.84026	3.14299	4.27172	3.06109	3.34641	3.97471	14.8067	4.59676	14.6416	3.22411												150
																								149	4.30487	4.28401	3.92861	3.07093	3.01081	4.86244	3.62365	4.774	7.01529	3.2016	4.5327	3.5462												151
																								150	3.23396	4.2587	6.01373	4.40143	3.34189	3.05845	3.3428	3.1438	3.1932	3.57073	4.3158	3.88419												152
																								151	3.16688	3.19357	7.9201	3.01785	3.66478	3.5218	3.48498	4.62647	3.19114	8.23965	3.35055	3.06205												153
																								152	3.52325	3.25213	6.0375	6.66144	3.49968	3.00432	3.46426	3.25887	3.00136	8.21342	3.11757	3.02166												154
																								153	3.01044	4.06792	10.0287	3.02215	3.34006	3.52166	4.40325	3.56291	3.26094	3.17143	3.26426	3.57508												155
																								154	3.44514	5.00775	7.84911	7.60014	3.50594	3.05331	6.46053	3.36511	3.92942	3.33855	3.0043	3.96668												156
																								155	3.75727	3.61304	7.35518	4.20443	3.03493	3.40718	3.89878	3.00582	3.21528	3.32719	3.4134	3.44032												157
																								156	3.23078	4.26275	7.8488	4.37783	3.67662	3.20422	3.57289	3.0324	5.77399	4.75071	3.31277	3.86228												158
																								157	3.15102	3.01143	6.76308	4.16753	3.09916	4.28655	3.12137	3.65231	3.90751	3.08089	3.37814	3.28429												159
																								158	3.39568	3.98227	4.03405	5.98538	3.59392	4.27978	3.00074	4.3735	3.20873	3.68952	3.58414	3.66741												160
																								159	3.16633	3.17777	12.1347	3.45343	4.07052	3.64409	3.03473	3.12346	4.91497	3.43952	7.90612	5.16767												161
																								160	3.1396	4.03256	5.84836	5.01369	3.36747	3.51668	3.89156	3.21249	4.07807	3.20394	3.40328	3.17478												162
																								161	4.31646	3.06935	10.095	7.72388	3.33025	3.84986	3.81095	3.61005	3.30278	3.67745	4.44305	3.5831												163
																								162	3.56703	3.12669	6.49264	3.93533	3.20295	3.25949	3.10357	4.59218	3.62848	3.5177	3.42036	3.58754												164
																								163	3.26555	3.17139	7.81689	4.74692	3.10578	3.28108	3.07307	3.30991	7.47578	3.58308	3.96113	3.13362												165
																								164	4.0435	5.20236	6.01121	7.50638	3.82507	3.94515	3.30888	5.36261	6.08304	3.74229	5.9237	3.4747												166
																								165	3.0549	3.44715	3.71842	6.16206	3.64996	3.03739	4.03971	3.29531	10.2452	5.24332	3.13132	4.69475												167
																								166	3.10861	3.30815	6.77382	8.70199	3.23812	3.05707	3.17822	3.09352	3.80629	3.118	3.53972	4.15812												168
																								167	3.0184	3.65809	5.3432	8.0015	4.09116	3.24792	3.83456	3.79673	3.28429	3.91218	8.19759	4.72792												169
																								168	3.29287	3.90837	8.72828	3.76122	3.08723	3.06478	3.80378	3.87354	3.36435	4.34703	3.19608	3.08772												170
																								169	3.52187	3.51063	9.65737	3.05296	4.9633	3.06421	4.14671	5.09256	3.17925	4.48808	4.26145	4.85418												171
																								170	3.15545	3.16587	5.79734	3.3071	4.02035	3.64292	3.23046	3.13132	5.10829	4.00698	3.97182	3.41342												172
																								171	3.067	4.07623	7.69201	3.47642	3.48275	3.00345	3.05889	3.12837	5.25915	4.13686	4.67025	3.83139												173
																								172	3.13587	3.69681	7.75575	3.52243	4.12187	3.13861	3.55646	3.1448	6.8535	3.1273	3.12512	3.74228												174
																								173	4.71056	3.14706	7.28235	3.74583	4.12139	3.69787	3.18322	3.18854	6.34649	3.32152	3.13795	3.6898												175
																								174	3.50104	5.02562	7.60197	5.48499	3.209	3.0792	3.12435	3.54202	7.5274	3.00017	3.13725	4.42215												176
																								175	3.02672	3.48333	9.00473	4.13466	3.65382	3.19417	3.61345	3.03568	7.61041	3.50607	3.06736	4.26835												177
																								176	4.14254	4.90591	5.33985	3.27875	3.65685	3.29941	3.48769	3.51751	3.34384	3.16127	3.15546	3.92796												178
																								177	3.05889	4.64478	6.02329	3.23053	3.72188	5.53322	3.5698	3.8686	3.06143	3.32239	3.49852	3.37148												179
																								178	4.97361	3.56873	9.70919	3.79734	3.2177	3.22069	3.549	3.60637	3.14469	3.8154	3.1112	3.46034												180
																								179	3.21819	3.39994	3.0075	3.86792	3.24303	3.53921	3.11939	3.78326	4.75262	3.24163	3.61954	3.00035												181
																								180	3.17903	3.52455	11.8279	3.88287	3.65805	3.61527	3.26743	3.18665	3.58506	3.99677	3.10049	3.20156												182
																								181	3.62014	4.00909	3.12709	3.24017	3.1761	3.10092	3.86603	3.49923	3.85755	3.32346	3.38886	3.6322												183
																								182	3.61505	3.34361	7.61793	3.58657	3.20661	3.22756	3.37118	4.37659	3.03628	5.97562	3.75951	3.74104												184
																								183	3.17967	4.51594	7.1816	6.70407	3.16369	3.94508	3.07694	4.08129	3.04604	3.68926	3.14089	3.56038												185
																								184	3.68257	4.36338	7.26085	4.75861	3.06305	3.08551	3.30629	3.7347	3.49278	10.8079	3.55165	3.48521												186
																								185	3.05684	3.10876	10.782	4.6471	4.28914	3.66941	3.54726	4.14699	3.22675	3.20101	3.07436	3.40376												187
																								186	3.06878	3.64008	5.03539	3.576	3.15707	3.30387	3.9519	3.27424	5.19923	3.54584	3.66772	3.5847												188
																								187	3.00084	3.81327	5.76308	4.56447	3.47605	4.40033	3.33097	3.89097	3.06062	3.3802	4.72334	3.2454												189
																								188	4.00898	3.22073	7.10982	4.19348	8.27528	3.40665	3.20465	4.62222	3.25781	3.35374	3.0295	4.02974												190
																								189	3.11882	3.15247	5.46872	3.32284	3.50555	3.03157	3.10748	4.63937	3.02996	3.00904	3.97499	3.14977												191
																								190	3.51491	3.44652	7.92224	3.82433	3.03075	4.70252	3.05548	3.11009	3.60266	4.40655	4.14899	3.21216												192
																								191	3.64426	3.54524	9.24297	4.93914	3.66334	3.29286	3.27201	3.45819	3.27929	3.81102	8.87856	6.29128												193
																								192	3.30885	3.92801	4.40292	4.28994	3.05961	3.20264	4.0312	3.24492	3.70492	3.00602	3.48427	3.79578												194
																								193	3.21429	4.49174	10.8828	3.05471	3.17293	3.65273	3.3147	3.94098	3.05646	3.06974	3.27484	6.19772												195
																								194	3.60337	3.03927	8.25937	3.51812	3.82314	3.62247	3.2573	3.26892	7.47629	3.62816	4.14251	3.14721												196
																								195	3.9768	3.57214	3.47781	3.11106	3.28912	3.3476	3.02882	3.41496	7.03565	3.05723	3.25568	3.85535												197
																								196	3.68181	3.74009	7.96446	3.93626	3.25823	4.754	3.68266	4.04939	3.98121	3.54175	3.09952	3.37545												198
																								197	3.45426	3.03914	10.2741	3.18126	5.00644	4.19375	3.49986	3.64133	5.24301	3.25665	4.40701	10.0863												199
																								198	14.2119	3.32388	7.08446	4.96442	3.24177	4.39246	4.00087	3.51987	3.4368	3.63486	3.9194	4.70873												200
																								199	3.17462	4.77488	9.73908	4.88952	3.1194	3.14785	3.16495	6.60788	4.94747	3.53993	3.10842	3.85199												201
																								200	4.46589	3.42076	6.91765	3.09465	3.52632	3.0432	3.26586	4.52209	8.26025	4.53914	3.22183	3.0215												202
																								201	3.83104	3.23093	7.68546	4.57255	3.26586	3.54525	3.41145	3.0218	9.30388	3.22146	3.36491	4.06679												203
																								202	3.84093	3.58973	3.98135	7.09684	3.45813	3.93006	4.4494	3.96945	8.15806	3.65722	4.18058	3.21542												204
																								203	3.2242	3.55269	6.9185	3.34565	3.04323	4.88974	3.87829	3.38764	4.97437	3.74057	3.83453	3.7524												205
																								204	3.16751	3.51794	3.39359	3.70484	3.08744	3.18395	3.50706	4.12821	3.82711	5.24695	3.46748	3.95699												206
																								205	4.42833	3.39587	5.5102	3.5657	4.8272	5.27035	5.00154	5.03491	3.50929	4.57831	3.80834	3.75288												207
																								206	7.8698	3.18504	7.24936	3.77326	6.03223	4.52484	3.34165	3.00552	3.02579	3.92702	4.33251	3.21682												208
																								207	3.3308	3.74901	3.15291	4.58944	3.57088	3.43897	3.21107	4.16911	6.06817	3.05606	3.41489	3.07065												209
																								208	3.25064	3.43429	3.23654	3.10251	3.67463	3.06294	3.96497	3.01824	9.68798	3.76447	3.79583	3.38535												210
																								209	8.69562	4.31473	6.24694	3.24394	3.69167	4.55926	3.34452	3.26845	3.79356	3.32247	3.0565	5.56795												211
																								210	3.79137	3.60536	6.98565	3.53422	3.39687	3.41375	3.26258	4.0976	3.20641	3.85446	3.17037	3.73173												212
																								211	4.90587	3.12067	8.70545	3.24784	3.47326	3.83699	4.18747	3.54614	3.91868	3.23649	6.07151	3.3349												213
																								212	4.24571	3.00075	3.0019	3.63013	3.57343	3.20634	3.32511	3.01284	3.66292	3.22043	3.10402	4.35336												214
																								213	3.07546	3.0675	10.0765	3.09176	3.23245	3.36819	4.01729	3.34984	4.14497	5.68215	3.74463	4.19996												215
																								214	4.34617	4.13413	6.66357	3.67468	4.821	3.56891	3.18741	3.26951	3.40324	3.63009	3.65995	3.12159												216
																								215	3.96436	4.29397	4.606	3.00996	3.91405	5.88757	3.37159	3.28455	3.18778	4.83996	3.40603	3.9417												217
																								216	3.07885	3.02659	4.49951	3.74983	3.23925	3.16723	3.70471	4.56612	3.98025	3.31648	3.67982	4.18001												218
																								217	3.47147	3.50776	10.3362	3.18638	3.12376	4.22375	4.55037	4.0744	6.52395	5.32628	3.70454	4.54199												219
																								218	3.21131	3.83699	4.79322	4.31264	3.33742	4.13463	3.01754	3.14307	7.39112	3.65908	3.16961	4.55399												220
																								219	3.08955	3.04291	4.21333	5.17555	3.78164	4.73375	4.83176	3.82621	6.00895	4.66612	3.55261	3.95468												221
																								220	4.45328	3.74832	4.46566	3.99657	3.23812	4.89412	3.72218	3.85456	7.3266	3.52539	4.05094	4.97305												222
																								221	3.76725	4.0798	5.89558	3.07859	3.07901	4.39168	3.4343	3.0083	4.65008	4.3324	3.69395	3.00623												223
																								222	3.78834	3.63987	6.1768	3.18274	3.99623	4.99891	4.50396	3.06212	3.14285	3.21566	4.29549	3.25903												224
																								223	3.69937	3.17199	4.43084	3.32871	3.4127	3.13195	3.33226	3.78924	5.34951	6.6222	3.13092	8.17311												225
																								224	3.02196	3.32161	4.94655	3.22436	3.80135	4.22655	3.18182	3.11285	3.50873	3.74745	3.04724	8.011												226
																								225	4.01459	3.73939	10.1031	4.63709	3.68483	4.85027	3.8476	4.15318	4.35423	4.13909	3.10784	5.68504												227
																								226	13.0629	3.62685	8.3985	4.94949	4.36549	4.26269	3.0264	4.61786	3.23199	6.14681	3.01717	4.40401												228
																								227	3.242	4.49347	5.98145	3.86101	3.56516	5.28219	3.18705	5.08555	10.0949	3.47541	3.01991	3.03013												229
																								228	3.86418	3.2194	3.43306	3.762	3.00646	3.85166	3.02026	3.43944	7.17097	3.53545	4.53257	3.34126												230
																								229	3.34669	3.14614	8.45261	3.64285	4.33631	4.94749	4.00923	3.34099	5.9455	4.58995	3.1088	3.24202												231
																								230	3.28926	3.71333	10.7685	5.70944	3.48658	4.18637	4.2549	3.14187	10.8369	4.25659	3.80463	3.72929												232
																								231	3.32046	3.10852	5.0785	3.09909	3.29832	3.83914	3.50148	3.07707	3.35745	3.39834	3.16449	3.56506												233
																								232	3.12732	3.36796	4.73364	3.99259	3.59607	4.16706	3.01806	3.23807	3.06938	4.30831	3.4164	3.01766												234
																								233	3.31891	3.29997	9.42279	3.29426	3.13188	4.53683	3.01531	3.02951	4.8242	4.19003	3.33822	4.58199												235
																								234	3.32326	3.26637	6.55149	3.76837	3.23138	3.74341	3.08549	4.54136	6.60096	5.4519	3.05505	3.54398												236
																								235	3.71081	3.54402	7.8457	3.11488	3.24846	5.30514	3.00395	3.60958	5.72953	4.90125	3.20523	3.82898												237
																								236	3.00857	3.26128	6.67626	3.4051	3.179	3.52479	3.15364	3.04075	8.77999	4.62406	3.20323	5.09788												238
																								237	3.63089	3.92823	6.13749	3.39547	3.95082	4.32457	3.11104	3.69101	3.05271	4.37436	3.05638	5.63208												239
																								238	3.43848	3.64803	4.22705	5.02393	3.85156	3.85114	3.30443	3.64759	5.94137	5.73923	3.14313	3.24636												240
																								239	3.32673	3.7471	10.2599	3.34163	4.1786	4.57015	4.31967	3.60339	3.16634	4.82707	3.05375	3.34992												241
																								240	3.39532	3.02125	7.42595	4.46821	3.1015	4.62914	3.90523	3.42106	3.05087	3.04089	3.53899	3.2151												242
																								241	17.6319	3.6403	5.29575	3.15454	3.78143	3.79944	3.26944	4.0061	3.54017	4.21622	4.03446	5.30238												243
																								242	3.07331	3.17032	5.02511	3.90114	3.60397	3.37242	3.60679	3.42804	3.12712	3.07579	4.25122	4.32336												244
																								243	4.61556	3.2243	5.89703	4.52147	3.84211	4.08946	3.01232	4.79387	4.0929	3.45439	3.18186	3.0863												245
																								244	3.26458	3.18513	5.60045	3.86453	3.61037	6.11178	4.20159	4.52079	3.48945	4.02656	3.33896	3.5607												246
																								245	14.1388	3.11731	4.21255	4.4135	3.20417	4.01347	4.12053	6.12461	4.68479	3.09414	3.08619	3.04004												247
																								246	3.50428	4.42016	5.92848	4.65751	3.09806	3.61128	3.04408	3.086	5.10038	3.93499	3.03335	6.43791												248
																								247	3.25718	3.05706	7.51985	4.05166	4.56419	3.93001	3.57747	5.39625	3.45857	3.51491	3.4183	3.64689												249
																								248	3.0053	3.2419	8.28671	4.27839	3.32936	3.64424	3.05547	3.83055	4.07009	3.36513	3.11836	3.19924												250
																								249	3.04725	3.52823	5.72966	3.33856	3.55008	4.65695	3.87399	3.66043	6.3416	3.36795	3.48198	3.00917												251
																								250	3.36601	3.5239	7.0905	3.86623	3.15112	4.60827	3.63829	4.79146	9.14844	4.19188	3.33967	3.74489												252
																								251	3.97427	3.27029	9.67822	3.80779	3.71209	7.48001	3.46709	3.16092	8.3482	3.31203	3.40205	3.54279												253
																								252	3.17355	4.38759	7.95598	3.08864	3.27826	3.55633	3.10347	3.84885	7.05601	3.45404	3.31219	3.22676												254
																								253	3.49852	4.68613	3.61409	3.00537	3.15512	3.32184	3.1676	3.57049	5.95369	4.04767	3.21592	3.11178												255
																								254	3.84964	3.23418	10.488	3.33614	3.7651	3.09774	3.11443	4.43158	9.33566	3.4057	3.07695	4.92399												256
																								255	3.70948	3.05303	6.95953	3.8722	3.37273	3.52563	3.17876	5.31775	9.56602	5.27003	3.29062	3.0686												257
																								256	3.28047	3.0902	10.2807	3.20493	3.42673	3.64682	3.0433	3.33549	10.3561	4.79449	3.60977	3.06298												258
																								257	3.24446	3.15275	3.89108	4.57661	3.22531	3.24972	4.95571	4.42506	3.60001	3.30652	3.27994	4.59332												259
																								258	3.35944	3.87079	7.5601	5.12762	3.09195	5.78197	4.5688	3.10635	3.28868	3.67877	3.33756	3.77839												260
																								259	3.43857	3.57435	6.43371	3.34804	3.02177	3.18311	3.10328	3.65525	12.4157	3.13942	4.45095	3.71686												261
																								260	4.1321	3.80866	6.71341	4.44568	3.57689	3.44521	3.24387	3.44955	6.37835	3.21024	3.13213	3.78653												262
																								261	3.82803	3.04679	3.19233	3.84684	5.9819	5.07774	3.07279	3.53327	4.40347	3.08746	3.25872	4.04814												263
																								262	3.22837	3.4197	7.15475	3.74003	4.18803	3.03739	3.40417	3.01576	4.41863	3.99061	3.5299	5.16442												264
																								263	4.68374	3.62008	7.4675	3.05027	7.17561	3.83035	3.11294	4.0685	3.09401	4.13295	3.22963	3.2008												265
																								264	3.73791	3.01326	4.4953	7.02588	4.08031	3.24048	3.10623	3.09743	4.6176	4.26491	3.14228	3.3647												266
																								265	5.15299	3.19126	8.26085	5.80077	3.58079	3.92579	3.93433	3.14899	4.91956	3.63204	3.57814	3.22051												267
																								266	4.01662	3.38188	8.51998	3.8992	4.06227	3.44147	3.33407	3.26261	3.50486	5.05498	3.37636	3.42977												268
																								267	7.1689	4.00649	6.0372	3.82336	4.43794	4.37965	3.96991	3.34694	3.76179	3.16204	3.29914	3.75243												269
																								268	8.04587	3.08556	5.53167	3.25438	5.94339	3.32706	3.74239	4.39226	3.76497	3.41202	3.24973	3.77202												270
																								269	5.18539	3.01748	5.72502	6.80079	7.73449	3.34889	6.37259	3.27282	3.088	3.26474	3.14878	3.67534												271
																								270	3.35766	3.10643	8.3563	4.49849	9.81699	4.4005	3.33109	3.12354	3.73827	4.79939	3.61656	4.40429												272
																								271	5.76525	3.83891	6.65427	3.17449	7.54107	3.79459	4.05691	3.22603	4.49871	4.03365	4.16922	3.29104												273
																								272	5.47633	3.08644	3.24957	4.06146	3.47068	3.29239	3.68873	3.11079	5.32465	4.78885	3.14666	4.26346												274
																								273	3.0585	3.12457	6.76453	5.04974	5.67829	6.06964	3.14344	3.2004	14.7695	3.03665	3.02619	3.09626												275
																								274	3.63216	3.61716	3.33089	3.11925	3.57211	3.165	3.02478	3.0378	3.34069	3.06112	4.10371	3.83637												276
																								275	3.0402	3.39023	4.64506	3.75011	3.37875	4.79894	3.15281	3.48733	5.13974	4.47529	3.74058	3.51256												277
																								276	3.05746	3.08045	3.27582	3.14406	3.18546	4.63619	5.77463	3.76781	3.63162	3.18359	3.78944	4.36452												278
																								277	3.35043	3.28352	3.0856	3.05241	8.48419	5.3674	3.18113	3.97839	3.60607	3.00619	4.09658	3.67446												279
																								278	4.50626	4.08838	3.8498	4.12173	4.89689	3.9064	4.06751	3.07305	3.73233	3.1922	4.01857	3.05502												280
																								279	3.04464	3.33059	4.50372	3.31223	8.32863	6.69402	3.02829	4.14483	3.4069	4.15702	3.40687	3.09104												281
																								280	4.32881	3.12068	7.53092	3.0976	3.06604	3.78739	3.23084	3.20085	3.27901	3.84904	3.49288	3.807												282
																								281	3.08052	3.60584	7.74368	5.2477	3.28999	4.55487	3.12522	4.29569	3.34414	4.03045	3.95655	3.62406												283
																								282	4.73341	3.35605	4.44709	4.78	3.15309	3.98311	3.30557	3.24688	4.46606	3.43464	3.01233	4.61647												284
																								283	3.69148	3.22196	3.43363	3.59289	3.02368	5.6712	4.1369	3.44118	4.33195	4.82111	3.15925	3.01182												285
																								284	3.13877	3.22569	6.62109	3.09571	3.07333	3.07057	3.38867	4.10476	3.08962	4.75944	3.28969	4.34812												286
																								285	3.62192	3.57742	3.69744	3.09846	3.17107	5.06155	3.02629	3.30236	4.38962	3.56147	3.31969	3.4713												287
																								286	5.96604	3.51928	8.15233	4.0729	3.17318	4.03501	3.01448	3.44939	3.79673	4.28313	4.20866	4.85605												288
																								287	6.35849	3.35587	3.37206	3.44058	3.67127	4.96492	3.12606	3.58956	4.70074	3.43518	3.79957	3.9556												289
																								288	4.00745	3.14095	5.15731	3.25775	4.12602	3.30043	3.26769	4.26645	3.55163	3.00114	4.81186	3.55163												290
																								289	3.42632	3.31871	7.56009	3.43768	3.21025	4.72593	3.21735	3.89972	5.78532	4.41716	3.27788	3.81266												291
																								290	3.2413	3.30546	8.89937	3.31506	4.24834	3.77291	3.20546	3.5481	5.59013	4.11134	3.23399	4.0106												292
																								291	3.32343	3.18056	3.16285	3.0842	3.6878	5.45345	3.43818	3.47794	15.9714	3.80581	3.57365	3.51548												293
																								292	3.18287	7.09433	12.8536	3.93671	3.01378	3.84406	3.41595	3.53178	5.85168	3.08191	4.8611	3.61727												294
																								293	3.28699	5.22997	3.45058	3.54957	4.34095	5.08491	3.69243	3.35194	3.63956	3.0276	3.09891	3.67138												295
																								294	3.23325	3.20437	5.31619	4.33373	3.55439	3.77782	3.52082	3.90739	3.46832	4.33069	3.83692	3.19389												296
																								295	3.26792	3.32772	10.9772	3.69788	4.06379	3.13802	3.06166	3.1208	3.82122	4.68482	3.35807	3.4389												297
																								296	3.00789	3.49792	3.2562	4.53035	3.70758	4.67965	3.38352	4.94247	5.95792	3.2735	3.21067	3.71294												298
																								297	5.49722	3.18877	3.72337	3.17262	3.72383	5.33251	3.09777	3.26063	4.0462	3.6598	3.02085	3.99489												299
																								298	3.09874	3.68699	3.80622	3.86077	3.7195	3.36399	3.90168	3.06031	3.39141	4.46792	3.40125	3.39703												300
																								299	3.2705	3.06518	3.07854	4.64071	3.02478	3.53994	3.69877	5.54767	3.01691	3.73152	3.29304	3.04634												301
																								300	3.07606	3.77984	3.85116	3.92193	3.5731	3.53635	3.13835	3.67223	6.68079	3.10324	3.13938	4.7717												302
																								301	3.46948	3.56393	11.3465	4.77951	3.41907	3.22288	3.07221	3.53601	3.77585	5.13547	3.39748	4.33982												303
																								302	3.14048	3.24479	5.31317	3.07937	3.92908	4.0295	3.06768	3.0289	3.03077	3.80984	3.10628	3.35006												304
																								303	3.32546	3.17129	4.12689	3.63799	3.51796	4.63528	3.35453	3.87896	3.36431	3.57246	3.96117	4.29007												305
																								304	3.33655	3.75514	4.1394	5.6351	3.25891	3.20278	3.82174	3.20139	3.02619	4.11795	3.55644	4.20476												306
																								305	3.58679	3.44756	5.61777	4.09078	3.16015	3.64088	3.34284	3.22798	6.84492	4.78677	4.08664	3.11854												307
																								306	4.95165	3.56127	12.2087	3.12529	4.21928	3.33852	4.15421	3.57891	4.75612	5.09419	3.72874	3.08533												308
																								307	4.17777	3.67144	5.13557	3.12894	3.85924	3.52433	3.63559	3.26532	3.48918	4.9091	4.65412	3.34378												309
																								308	4.27311	3.13049	8.81361	3.2716	3.04431	3.1058	7.82338	4.17359	6.44364	3.32047	4.52944	3.16101												310
																								309	3.29433	3.20083	5.52438	3.46351	3.83526	3.25941	3.04061	3.4547	7.95845	3.11379	3.30157	3.08171												311
																								310	3.44987	3.80571	3.74669	4.28156	3.54093	4.73777	3.20752	3.2861	8.42052	3.16487	3.92732	3.92582												312
																								311	4.65923	3.70424	3.61261	3.79772	3.63982	3.15537	3.40491	3.86253	5.96581	4.49853	3.09425	3.24048												313
																								312	3.31586	4.67207	6.49064	3.10364	3.00954	6.45978	3.13269	3.11225	5.54151	4.41799	3.22634	3.21353												314
																								313	3.18293	3.40832	4.77619	3.79451	3.09396	3.59716	3.74167	3.89392	4.16527	3.97148	4.20082	4.10393												315
																								314	3.07201	3.55523	11.2866	4.02599	3.76878	4.03834	3.21584	4.82506	4.05076	3.00644	3.60915	4.02286												316
																								315	4.81019	3.228	3.32974	3.05691	4.2187	3.60201	3.35174	3.12506	8.96538	3.27921	4.09267	3.052												317
																								316	3.80606	3.07203	3.56372	3.32745	3.91363	4.90092	3.1526	3.06091	9.80888	4.39936	3.43426	3.51594												318
																								317	3.22482	3.00941	3.54218	3.91024	3.16836	6.61308	4.43956	3.26278	10.4545	5.01425	3.67298	4.54051												319
																								318	4.39525	3.18823	3.38656	3.56552	3.9812	3.63056	3.28555	3.00167	6.39951	4.02159	3.55714	3.15269												320
																								319	3.04986	3.05738	4.0007	5.1257	4.08841	5.30664	3.33342	3.153	4.29876	3.42172	3.13084	3.10709												321
																								320	4.22592	3.05887	3.06961	4.64635	3.0653	5.15968	3.5868	3.92198	10.7906	3.11478	3.49083	3.47445												322
																								321	4.04537	3.34394	7.45911	3.77433	3.28662	3.59981	3.33998	3.56777	3.70407	3.01613	4.0075	3.62912												323
																								322	3.92101	3.65067	11.9194	4.20319	3.27559	3.83338	3.35608	3.1114	9.73198	3.64081	3.30883	4.30373												324
																								323	3.06225	3.14302	10.083	4.85599	3.10226	6.8739	3.29092	4.22608	10.2875	3.70693	4.25229	3.04681												325
																								324	3.50292	3.9257	5.29747	4.91827	3.60759	3.60053	3.07206	3.36867	3.05233	3.35083	3.01348	3.90164												326
																								325	3.39944	3.67986	8.40936	4.98843	3.12836	6.6702	3.50349	3.15626	5.1567	4.23865	3.68939	3.18319												327
																								326	3.00925	3.3814	6.55166	3.08035	3.13561	3.87449	5.15091	3.72657	7.2665	3.84398	4.70032	3.07308												328
																								327	4.22567	3.04829	7.30059	4.98886	3.4842	4.22438	4.16714	3.84301	3.99316	3.49202	3.76572	3.39538												329
																								328	3.35763	3.16644	9.52674	3.92476	4.32028	4.70364	3.48004	3.05766	5.41121	3.39961	3.3621	3.85428												330
																								329	3.45137	3.0138	3.82747	3.17521	3.53486	4.15831	3.52797	3.22906	3.08942	3.24336	4.17922	3.54442												331
																								330	3.11461	3.02999	4.49375	3.24746	3.008	5.13115	3.0864	5.33572	4.08648	4.13157	3.06971	4.16155												332
																								331	3.05863	3.28318	7.64808	3.82534	3.31753	3.12279	3.12665	3.22246	3.18258	3.5377	3.0267	4.87319												333
																								332	4.19415	3.50347	8.24617	12.7078	3.74638	4.18852	3.57744	3.08829	4.01413	3.57982	3.10432	3.31527												334
																								333	3.08627	3.06161	6.30515	4.28518	4.10332	3.74108	3.50666	4.10978	3.02446	4.04339	3.29953	3.0925												335
																								334	3.47853	3.14788	9.32898	3.18891	3.03949	4.71265	3.83002	3.6318	3.77639	3.09867	3.06126	3.1267												336
																								335	3.64598	3.90348	6.42218	4.2557	4.14824	3.48046	3.2546	4.16895	3.38186	3.76171	3.05844	3.59973												337
																								336	4.41622	3.67709	8.38101	5.74695	5.76026	4.20399	3.62174	3.44175	9.82356	3.18049	3.87737	3.58904												338
																								337	4.0322	3.02063	6.70966	3.86271	4.17631	3.97423	3.49939	4.32054	4.79296	3.17031	4.34415	3.79105												339
																								338	3.21065	3.41304	9.41459	3.21857	4.77115	4.43725	3.93055	4.18132	7.3625	4.25517	3.59111	3.25011												340
																								339	3.27609	3.66634	6.49488	3.33561	3.7391	5.17921	3.29691	3.12255	6.16005	4.7111	3.27677	3.74283												341
																								340	3.49013	3.7112	3.5752	3.57994	3.21152	3.89642	3.50159	3.10563	3.61489	5.64541	3.84314	4.16754												342
																								341	3.49532	4.77378	5.41838	3.09862	3.29733	3.47107	3.72322	3.26949	5.66151	3.12784	3.08799	4.43837												343
																								342	3.61821	3.2994	5.57305	7.11119	3.5273	3.25896	3.01799	3.25277	3.615	4.84126	3.01755	3.43267												344
																								343	3.48181	3.02357	5.59971	4.23767	3.31367	3.16655	3.59652	3.03207	8.58135	3.07542	3.47173	5.53358												345
																								344	3.98227	3.24593	4.93495	4.04023	4.5437	6.53041	3.88482	3.3043	9.43936	3.01131	4.04468	3.83867												346
																								345	3.13076	4.38429	7.73677	5.6889	3.05483	3.42223	3.48939	3.45306	3.10151	3.2983	3.59744	3.721												347
																								346	3.07503	3.40147	10.2196	5.08302	4.10599	3.05012	3.10276	4.68855	9.16497	4.24935	3.97712	3.04289												348
																								347	3.07687	3.28947	8.57074	3.98192	3.18817	3.802	3.79716	4.68551	6.02131	4.12351	3.85714	3.78543												349
																								348	3.80241	3.53907	12.1402	5.20735	5.66832	5.79347	3.17692	4.59665	5.68393	3.38239	3.17454	4.09841												350
																								349	4.6972	3.12707	7.80945	3.0117	5.95228	3.45501	3.00464	3.32132	10.182	3.76885	3.4057	3.23016												351
																								350	3.3512	3.21098	4.96161	3.3102	5.12747	3.33619	3.07086	3.01833	5.61372	3.44431	3.7428	3.02863												352
																								351	3.56379	4.10479	4.94646	3.11029	3.464	3.05279	4.50647	3.0076	7.75528	4.63724	4.16231	5.21026												353
																								352	3.57952	3.23985	14.5145	3.53284	3.06261	4.68823	3.45671	3.01416	3.2273	3.69063	3.93103	3.03509												354
																								353	3.27317	3.23608	7.23604	3.5371	5.62685	5.95409	3.18084	3.50283	3.58193	3.65447	3.50386	3.19199												355
																								354	3.49267	3.11763	13.705	3.88004	3.08176	3.57881	3.18707	3.24878	3.10568	4.51658	3.06829	3.03554												356
																								355	3.41805	4.1072	5.68444	3.31931	3.23726	3.08724	3.08324	3.92717	7.31356	3.01971	3.61546	3.08137												357
																								356	3.03866	3.08843	8.80138	8.8927	3.25468	3.03045	3.45828	4.46117	6.49411	5.03488	5.59898	3.22977												358
																								357	3.33443	3.10156	7.78678	4.24168	3.21114	3.04742	4.26247	4.56796	3.73764	3.19731	3.16664	3.03178												359
																								358	3.33821	3.0631	7.44396	3.96692	3.38779	3.32308	3.72519	4.74764	6.38033	3.64477	3.02162	3.1043												360
																								359	3.60725	4.04397	4.93972	3.23199	4.05287	3.07926	3.52646	3.5283	9.32917	4.73036	3.87388	3.73028												361
																								360	3.36071	3.73313	10.4909	3.84222	3.55747	3.66732	3.22255	3.40663	8.50205	3.57342	3.12067	3.31556												362
																								361	3.38554	3.01904	7.32161	3.30026	4.23258	3.44032	3.18821	3.33527	4.3093	4.01135	3.10134	4.06636												363
																								362	3.8755	3.5005	9.09239	3.63458	3.40356	5.45207	3.20894	5.25765	3.37669	3.01471	3.5111	4.32654												364
																								363	3.33979	3.21106	9.3531	3.07207	3.36828	3.2539	3.70343	4.5184	3.2589	3.11406	3.58606	3.09394												365
																								364	3.04111	3.47372	10.0729	3.55324	5.35347	3.16258	3.77125	3.19813	3.7744	5.01589	3.28921	3.16455												366
																								365	5.82409	3.72779	12.4696	4.06942	3.02469	3.02487	3.28704	3.1374	3.06627	3.87334	3.13396	3.77063												367
																								366	4.78793	3.01965	6.36354	4.91294	3.07023	3.60752	4.32188	3.01613	3.77013	7.70453	3.30623	5.92666												368
																								367	3.8013	4.02471	9.79769	3.4792	4.42556	4.16957	3.91619	4.03615	7.21278	3.49516	3.2257	3.05656												369
																								368	3.35376	3.69561	10.0408	3.91723	4.29431	3.37339	3.49712	3.37453	3.55628	3.13513	3.40185	3.41419												370
																								369	3.74647	3.00128	10.393	6.85554	5.04125	3.24424	3.42866	3.42394	3.26075	3.9507	4.44465	3.15324												371
																								370	3.67024	3.32139	3.67779	4.49451	6.51515	3.34077	3.73739	5.48371	3.54529	3.20257	3.89412	3.67075												372
																								371	3.28857	3.33485	7.08838	3.46308	3.65477	3.61261	4.12935	3.75093	4.50461	3.20473	3.07482	4.58674												373
																								372	3.45864	3.24818	16.5385	4.35991	3.5585	3.46032	3.31911	3.20447	4.21781	3.00091	3.39524	3.6381												374
																								373	6.04448	3.10163	11.6373	5.69151	7.67912	4.23348	3.80863	3.35537	6.55732	3.60588	3.91476	3.54935												375
																								374	5.41298	3.06201	5.20272	3.47679	4.14031	3.81595	3.1268	3.19837	3.04717	3.44719	4.16987	3.00239												376
																								375	3.28089	3.06608	3.23234	3.19878	3.31059	5.98009	3.22321	3.32012	9.03937	6.53237	3.71551	3.06032												377
																								376	4.12545	3.07507	3.72994	3.10356	6.91283	4.10388	3.63761	5.41213	4.88428	3.31581	3.23629	3.09609												378
																								377	6.54973	3.05423	7.19441	3.91584	9.90977	5.01837	3.37855	3.62091	9.88981	4.07056	3.03628	3.31215												379
																								378	3.74234	3.38711	5.82304	3.78282	3.46249	3.4374	3.13407	3.2602	5.9284	3.52904	3.629	3.38663												380
																								379	3.04002	3.15987	6.71949	3.53087	4.5634	3.14526	10.9837	3.29925	4.33497	3.07817	3.6744	3.23007												381
																								380	3.29476	3.84309	8.11251	4.07848	3.91324	3.25541	4.01137	3.08989	11.6928	3.10283	4.27684	3.04266												382
																								381	3.39348	3.20952	8.82035	3.12455	3.01976	3.60317	3.21415	3.3662	6.88996	4.07904	3.01307	3.96513												383
																								382	3.48695	3.94682	6.37828	3.54751	3.47687	4.13749	3.27567	4.41211	6.31977	3.06327	3.5235	3.29631												384
																								383	4.03119	3.16351	6.51364	4.25126	3.55152	4.24245	3.1916	4.02738	3.97823	3.54352	3.69752	3.09258												385
																								384	5.85968	5.38834	10.3358	3.08546	4.68294	3.49499	4.31202	4.6656	3.99741	3.83802	3.03935	3.21863												386
																								385	3.77773	5.05456	12.164	3.33664	3.04346	3.59898	3.3287	3.36605	4.06408	3.90004	3.05326	3.82819												387
																								386	3.00518	4.12359	7.08758	3.03914	3.14319	3.24731	3.40664	3.2632	4.30858	3.24079	3.54819	4.63936												388
																								387	3.3394	5.31219	10.7218	4.11555	3.37148	3.31403	3.05612	3.06924	3.55732	3.9003	3.69813	3.21204												389
																								388	5.39629	4.97871	8.92234	3.30556	3.03382	6.16744	4.06025	3.16442	4.18842	3.36141	3.49097	4.04809												390
																								389	3.32455	5.05179	9.59134	3.19424	3.41749	5.45441	3.38041	14.1036	5.73432	3.42107	3.04497	3.13374												391
																								390	3.28073	4.00034	4.91525	4.0265	3.07973	5.50263	3.81277	3.72768	3.11042	3.02107	3.99244	3.05292												392
																								391	4.31763	3.84095	4.74297	3.24257	4.1411	3.21436	3.09979	4.14694	4.13482	3.48736	3.2153	3.56503												393
																								392	6.33249	4.09286	10.7487	4.28562	3.35801	4.63567	3.0479	3.61991	3.93406	3.03168	3.0254	3.83796												394
																								393	3.03851	3.34934	8.22257	7.70426	5.58212	3.22048	3.0095	3.63713	3.12547	4.0886	3.159	4.04117												395
																								394	3.24791	3.81993	13.5155	3.33074	3.39765	3.14301	3.15907	3.10824	5.2783	3.98863	3.02462	3.00628												396
																								395	3.04155	3.65122	6.512	4.42444	5.05115	3.41749	3.03632	3.70513	8.14634	4.50441	3.59981	3.88243												397
																								396	3.28303	3.06625	3.96158	3.48242	3.04147	3.63814	3.2336	4.14556	6.76143	3.10736	3.17814	5.78902												398
																								397	3.02415	8.70902	3.0199	4.58587	3.76214	3.61585	3.50314	3.83253	4.16311	3.05232	3.02573	4.59497												399
																								398	4.28589	3.45351	9.46436	3.15108	3.03287	3.15617	3.36259	3.23451	3.44989	4.21069	3.14986	3.25743												400
																								399	3.22973	4.4419	9.96973	3.47951	3.08558	4.01472	3.12836	3.32756	3.53581	3.87338	3.61503	3.43169												401
																								400	3.07507	3.834	10.6812	3.71106	3.08536	3.46728	3.14337	4.24184	3.5417	3.76647	3.05914	3.80251												402
																								401	5.53317	3.03395	11.4236	3.51107	3.3126	3.88026	3.89589	3.75691	3.5222	3.06022	4.65776	3.47655												403
																								402	3.06915	4.58119	8.75398	3.40032	3.9979	5.58704	4.04929	3.13122	3.5769	4.75224	3.59585	4.34351												404
																								403	7.7811	5.61133	12.0554	3.85808	4.61225	3.23618	3.81616	4.02637	3.0202	5.0757	3.00052	3.79226												405
																								404	4.61502	6.39883	12.7655	3.63236	4.39627	3.3005	4.9075	5.37973	3.62609	3.16227	3.12649	3.80124												406
																								405	3.59638	4.44199	7.02355	3.22059	3.28294	3.36892	3.777	3.062	3.12516	3.17243	3.25038	3.41907												407
																								406	3.51206	6.86933	9.96085	3.56196	3.19294	4.30345	5.71525	4.52259	10.5354	3.84115	3.51846	3.9492												408
																								407	3.42125	5.66984	6.01867	4.99741	3.21703	3.4643	3.14466	3.8483	4.03827	3.35336	3.00041	3.41912												409
																								408	3.30711	5.69511	7.84861	6.45543	3.22611	3.27871	3.05067	3.83489	3.01242	5.29291	3.00259	3.02296												410
																								409	3.0326	3.21083	7.66162	3.20683	3.45723	6.81116	5.12249	3.13687	10.1831	3.13563	3.21465	3.23598												411
																								410	3.16621	3.50241	3.47957	5.33037	4.84673	3.93927	3.47524	4.7839	4.22735	3.87364	4.49542	4.95222												412
																								411	3.6999	3.14219	7.82127	3.61286	3.76025	4.47124	3.05211	3.19539	3.69147	3.10469	4.01151	3.08454												413
																								412	3.2846	3.35183	4.63963	3.12713	7.32109	4.27058	3.26328	3.45384	3.95278	3.05039	3.00753	3.5501												414
																								413	3.4772	3.05114	4.09263	3.78291	4.79588	4.37668	3.02715	5.34178	3.00872	3.2806	3.07851	3.08647												415
																								414	4.79606	4.07978	3.84982	3.65086	3.17179	3.22139	3.10773	3.06121	3.84203	3.22999	3.09576	3.34212												416
																								415	3.52332	3.13097	14.0397	5.07713	3.10408	3.31128	3.40744	4.5063	3.50142	3.79392	3.11997	3.08278												417
																								416	3.18826	4.46299	3.01543	6.16824	3.29775	3.38726	3.4933	3.17283	7.48495	4.0756	3.04697	3.5052												418
																								417	3.86913	3.83016	3.03304	3.05733	5.14969	3.28638	4.11023	3.33996	3.29122	4.92946	4.76757	3.39021												419
																								418	3.2086	4.7565	3.50791	3.39458	3.04158	3.58794	3.4973	4.36046	3.09938	4.01088	3.03547	3.68721												420
																								419	4.42897	3.37766	9.98801	5.50316	3.12344	3.31613	3.42729	3.32242	7.30176	3.75056	3.38424	3.01739												421
																								420	3.18761	3.59322	7.12317	3.06998	3.57398	3.13265	3.49923	3.73577	7.59159	3.79605	4.81485	4.9131												422
																								421	4.32218	10.2187	5.04309	3.38729	3.18624	4.28072	4.15486	5.05936	7.27825	4.65908	3.20708	3.64717												423
																								422	3.15469	3.30969	3.45263	6.03375	3.91657	4.81936	3.10494	4.20807	6.90885	3.1419	3.04717	3.96137												424
																								423	3.01639	3.48944	8.84821	3.54645	5.14113	4.37491	3.27822	3.0307	6.64948	3.04231	3.13373	3.67667												425
																								424	10.9632	3.43117	3.81392	4.31772	5.80744	3.49705	3.33297	3.51635	3.0575	3.60681	3.4779	4.30482												426
																								425	6.4539	4.32818	12.0652	3.15585	6.86104	3.42991	3.06107	3.05351	5.9255	6.97104	3.43786	3.14395												427
																								426	6.41168	4.99084	5.41272	5.42973	3.21406	3.85057	3.57727	3.99875	10.5821	3.22479	3.24743	3.409												428
																								427	3.40701	5.29314	12.9144	3.91119	3.20153	3.49502	8.29683	3.08069	3.07534	3.51949	3.35917	3.47629												429
																								428	6.81947	4.60493	9.411	4.51626	4.41412	3.07674	3.12002	3.53818	3.18011	3.87654	3.62496	3.3784												430
																								429	3.85011	3.2793	4.3061	3.39548	3.71403	4.23904	3.14474	4.74092	3.33685	3.48374	3.31924	3.00746												431
																								430	3.36782	3.23172	6.1487	5.81659	5.14624	3.38166	5.09164	3.4832	3.21002	3.17533	3.48858	3.06274												432
																								431	3.47226	4.55054	5.11795	3.54308	4.84573	3.13507	3.34051	3.20823	3.88357	3.93974	3.10522	3.52389												433
																								432	4.37106	3.97755	4.77453	3.26821	5.00876	3.41137	3.15811	4.12692	9.00319	4.55644	3.0029	4.84011												434
																								433	4.05029	6.57165	9.58265	4.8565	3.31564	3.33527	3.78677	4.14641	6.32038	3.87909	3.13811	3.50254												435
																								434	3.01823	4.42026	6.03071	3.68403	6.90766	4.53231	3.3657	3.12618	11.2845	3.25264	3.06847	3.5499												436
																								435	3.37099	3.56598	15.7391	3.25898	5.6308	6.08048	3.32418	4.43216	3.30102	4.22036	3.02594	4.44703												437
																								436	4.08047	4.26157	3.22629	5.06466	6.55748	3.32448	3.3214	3.24109	14.2391	4.30888	3.15093	3.24521												438
																								437	3.05409	6.85198	7.45513	5.41408	3.96512	3.53837	3.25638	3.19216	3.44289	3.65595	3.90823	3.72882												439
																								438	4.46401	4.29885	5.07462	3.25367	7.73058	3.06396	3.04338	3.30632	7.0364	5.03208	3.35971	3.71372												440
																								439	3.06316	4.19428	5.4892	4.03455	9.2241	3.38232	4.71034	3.00013	3.10951	4.79212	3.46487	3.47566												441
																								440	3.03982	4.38034	8.8154	3.34253	9.21317	3.2649	5.94384	4.51779	3.6129	4.29139	3.8591	3.08401												442
																								441	3.62104	4.14108	11.4526	4.49217	4.65113	4.25212	3.1912	3.68747	3.15568	3.278	3.64213	3.89483												443
																								442	3.12849	3.50081	8.83699	4.94214	3.28682	3.69696	3.03171	3.71316	7.00808	4.58371	3.61481	4.24574												444
																								443	3.15002	3.48482	4.49688	9.4266	3.21169	4.30129	3.06703	3.90539	7.21116	3.66095	4.26118	4.70462												445
																								444	3.47477	3.69752	5.84619	3.90308	3.24389	3.28692	3.6508	3.32649	7.82797	3.42789	5.61546	4.30446												446
																								445	4.42798	3.19737	11.2053	4.7977	4.17687	3.17231	4.24551	4.55871	6.11771	6.8849	3.27196	3.06217												447
																								446	3.07009	4.47501	8.80853	3.00191	3.22315	4.55879	3.60458	3.09241	6.67819	5.10071	3.19346	3.00788												448
																								447	5.74504	4.73764	8.27968	3.77309	3.05425	3.51143	3.42243	3.60642	5.51617	4.38411	3.13747	3.60495												449
																								448	3.76901	3.52205	5.52535	3.71972	3.65882	3.09339	3.48117	3.20299	3.05687	4.23327	4.83408	4.66266												450
																								449	3.01528	4.4955	3.96666	3.92287	3.5199	5.18391	3.41731	3.00611	5.26249	3.17117	3.1726	3.3606												451
																								450	3.03582	3.051	4.48762	3.14983	3.07081	3.0303	5.00336	4.11063	3.34013	3.42963	3.77127	3.04608												452
																								451	3.15858	6.52583	5.32546	3.66155	3.61053	3.34081	3.25336	4.07282	4.07081	3.83447	3.20855	3.15562												453
																								452	3.1507	3.07704	10.8605	6.0292	3.36381	3.7874	3.65042	3.88434	12.5552	4.05718	3.35068	3.51292												454
																								453	3.47487	4.73636	5.13513	3.39978	3.16293	3.57182	3.1299	3.68529	9.50711	3.90682	4.13957	4.37345												455
																								454	3.22099	3.00145	4.42695	5.30582	6.25462	3.82298	3.27028	3.01596	10.3416	6.11032	3.46645	5.10282												456
																								455	3.10902	5.68062	5.15933	6.31628	4.36715	3.25979	3.82203	3.10592	8.04454	3.09859	3.09703	4.49927												457
																								456	3.0193	4.37572	8.17759	3.2709	6.42494	4.68304	3.19099	3.89324	5.78527	4.93828	3.59234	4.22418												458
																								457	4.34241	5.26694	6.93287	4.57345	4.22499	3.58462	3.42028	4.28043	9.46115	3.47924	3.14674	3.2504												459
																								458	3.02159	3.48274	11.5377	3.04965	4.06048	3.22133	3.16952	3.6898	9.12257	3.55515	3.58996	3.51316												460
																								459	5.80004	4.92898	6.8068	3.05603	3.00015	3.029	4.5256	3.03567	4.48473	3.28549	3.28792	3.27855												461
																								460	3.39261	7.55129	6.2202	3.62127	3.02942	3.93696	3.31974	4.41436	5.05046	4.48904	3.37095	5.21886												462
																								461	3.06068	6.90086	3.0167	3.47989	3.52112	3.58911	3.79522	3.82475	4.00759	4.59849	3.58516	3.23219												463
																								462	3.5263	9.2476	3.17361	3.10542	3.08176	3.38461	3.15561	3.28105	12.5866	3.0066	3.02945	3.23308												464
																								463	3.42082	6.56529	11.2215	3.0088	4.45077	3.64331	3.13409	3.30384	7.5673	4.40195	3.9537	3.75637												465
																								464	4.01681	3.79067	9.94414	3.42435	3.37819	3.77773	3.03037	3.45401	9.53751	4.80489	3.26618	3.2816												466
																								465	4.07435	3.86114	7.50942	3.76508	3.12945	3.06697	3.41279	3.45017	3.21931	3.32399	3.58187	3.64887												467
																								466	3.10896	4.54251	4.25399	3.14112	3.29322	3.12165	3.15926	3.42733	3.70076	3.20428	3.46507	3.55415												468
																								467	6.94445	3.36941	8.99532	4.01903	3.80364	3.64606	3.11414	3.09723	3.09394	3.73899	3.38323	4.59413												469
																								468	7.11334	3.73615	7.87237	3.06661	3.1865	3.68815	3.88854	3.61025	3.9436	3.46212	3.32277	3.03083												470
																								469	3.32809	3.35302	12.6978	3.07014	3.12024	4.75621	3.76757	3.45276	4.12724	4.53385	3.40754	3.66451												471
																								470	3.05187	3.13404	6.45526	3.10087	3.89095	4.81214	3.11534	4.82869	3.60716	3.49993	4.69977	3.79479												472
																								471	3.79089	3.83561	11.1859	3.11006	3.69611	3.69987	5.66989	4.03211	3.04076	4.25545	3.82478	3.48468												473
																								472	3.06758	3.25293	10.3231	3.20214	4.08268	3.47043	4.36655	3.42412	12.93	7.07069	3.22476	3.1404												474
																								473	3.69125	3.48684	3.10008	3.29376	5.23392	3.40365	3.9367	4.165	3.7545	5.21805	3.05214	4.36991												475
																								474	3.86463	3.24916	3.30241	3.88541	3.1403	3.79277	4.53483	4.29357	10.4033	3.00626	3.83673	3.82469												476
																								475	3.13005	3.08114	3.90226	3.36158	4.08666	3.55635	4.09449	3.30917	4.07464	4.55551	3.54451	3.79118												477
																								476	3.44317	3.88099	7.13341	3.04006	3.20924	3.93218	3.42542	3.54093	4.72108	3.11681	3.4754	3.33664												478
																								477	3.44607	6.37935	4.29132	4.05522	3.5724	3.3742	6.96052	3.22183	3.13461	5.62797	3.65617	4.61143												479
																								478	3.19965	6.19442	6.50074	4.0455	3.71466	3.23106	3.39722	3.55043	11.786	5.63906	3.26521	3.0172												480
																								479	3.41922	4.09871	8.97749	3.86935	3.34582	3.31056	8.2183	3.32847	6.36728	3.14951	3.19863	3.20756												481
																								480	3.77495	5.04085	6.9986	3.06717	4.05986	3.37686	4.11246	4.45227	4.29672	4.49906	3.06536	3.69335												482
																								481	3.11177	4.31558	6.06327	4.64297	3.02387	3.33051	3.10005	3.04977	3.55145	5.14038	3.55096	4.7271												483
																								482	3.26562	3.59812	4.46114	3.52203	3.77545	4.01982	3.96293	3.56578	3.04032	3.00085	3.07904	3.53247												484
																								483	3.24093	4.83268	7.98039	3.20792	3.33801	5.69106	4.16023	5.29501	4.0835	3.19829	3.18637	3.6592												485
																								484	3.00009	3.4993	3.132	3.4925	4.10812	3.61057	3.49638	5.23914	3.58485	3.23029	3.11964	3.02173												486
																								485	3.0298	4.77505	3.38995	3.25585	3.65557	3.33674	3.49382	3.25876	3.86926	4.89096	3.26536	3.62752												487
																								486	3.32295	3.79962	3.27762	4.06965	3.19456	4.528	3.08915	3.44945	3.01533	4.85791	3.53694	3.83525												488
																								487	3.57555	4.27673	5.4906	3.42314	3.33246	3.53881	3.39179	3.06198	3.22622	4.85111	3.05492	3.81528												489
																								488	3.32378	3.44152	3.68468	3.02888	4.39685	3.12912	4.60271	3.24299	13.6561	4.15079	3.15523	4.71998												490
																								489	3.11892	3.32512	12.8692	3.79573	3.47424	5.25627	3.0346	3.62504	3.04839	3.73525	3.02281	3.83217												491
																								490	3.11134	3.66761	3.70266	3.82555	3.34736	3.75426	3.34425	3.61293	4.19745	4.16058	3.60648	3.32488												492
																								491	3.01062	3.47917	6.98935	3.35745	3.16826	3.14653	3.86785	3.31224	4.42101	3.17841	3.02354	3.86425												493
																								492	3.40208	4.47539	5.34417	4.44679	3.11191	3.11359	3.04638	4.78773	3.91359	3.85373	4.79045	3.01425												494
																								493	4.97695	3.43783	4.1613	4.73804	3.14392	3.42717	3.20995	4.30011	3.21362	5.57378	3.20291	3.19818												495
																								494	3.39837	3.34757	8.67474	3.40329	3.05651	3.53816	3.83527	4.0625	3.16777	3.34129	3.09561	3.45731												496
																								495	3.77159	4.24309	3.03566	3.98632	3.4359	3.97389	3.14877	3.94163	7.43671	6.12169	3.19033	3.00726												497
																								496	3.08113	3.82	7.43362	5.51825	3.49196	3.41919	3.14608	3.60594	8.50384	4.00711	3.07237	3.36304												498
																								497	3.34299	3.13454	8.04077	3.9998	3.09639	3.38746	3.01328	3.03584	4.53618	6.28531	3.24953	3.19025												499
																								498	3.23879	3.22819	9.7686	3.03807	4.80317	5.74912	3.44204	3.09469	5.43242	3.98216	3.18197	3.21459												500
																								499	3.00544	3.18671	12.2483	3.50051	3.05683	3.65006	3.26449	5.80086	7.65527	5.28126	5.48882	4.67971												501
																								500	3.23899	4.07891	6.03373	4.11312	3.26181	3.06508	3.60362	3.17812	4.13636	3.13586	4.6268	3.49595												502
																								501	3.25258	3.97703	8.23338	3.01003	3.48055	7.41087	3.70981	5.96911	5.13702	3.28778	3.09203	3.01069												503
																								502	3.38923	3.11399	11.2528	7.39131	3.83845	6.06703	3.5748	3.20518	4.18411	3.09668	3.02737	4.04118												504
																								503	3.47679	3.53419	7.37833	6.35009	3.13761	3.09789	3.92553	3.1355	4.12824	3.24021	3.79531	8.00259												505
																								504	3.01442	6.49843	11.0896	3.30255	3.0447	5.78153	4.80918	3.0225	9.04927	4.0384	3.87111	3.93978												506
																								505	3.31417	6.92766	10.6535	4.98303	3.23285	3.40086	3.14131	3.26121	4.13333	3.14037	3.52761	3.02181												507
																								506	3.60896	3.8877	3.16731	11.811	4.01246	3.35379	3.02954	3.3153	10.3805	4.03045	4.09174	3.32429												508
																								507	3.05781	3.56325	3.69123	8.07823	3.35825	3.10803	3.10281	3.19994	12.321	3.48884	3.29274	3.22126												509
																								508	3.82208	4.11279	3.31542	9.86602	3.52894	3.92209	3.54343	3.18189	5.97853	3.28939	3.47154	3.57888												510
																								509	3.16695	3.77671	3.80443	9.03673	10.6629	3.82104	4.0933	3.47727	4.51425	3.50206	3.75373	5.16005												511
																								510	3.01359	3.00062	4.37801	5.43677	3.40486	3.29813	3.24071	3.36311	7.86813	3.16578	3.28848	5.52742												512
																								511	3.02312	4.28104	7.57139	4.11804	3.4122	3.32642	4.21875	3.94842	7.51536	4.15411	4.09373	3.88836												513
																								512	3.44709	5.17833	6.07177	12.0995	3.08802	3.60145	3.41732	3.60527	3.14239	3.84071	3.24319	3.6429												514
																								513	3.11755	4.24366	3.59336	10.8825	3.11059	5.21578	3.30432	3.4849	7.63289	3.20642	3.5705	3.02208												515
																								514	3.22087	3.12715	6.30198	12.7845	3.54147	4.57919	3.10594	6.26186	16.4659	4.19221	3.51075	4.22302												516
																								515	4.09223	4.14491	4.78551	13.3777	3.39423	3.38584	4.05336	3.44782	7.03756	3.95797	3.46893	3.51506												517
																								516	4.29366	4.77341	4.54663	5.60422	3.26912	4.57245	3.03246	3.2818	4.22875	3.34689	3.39307	3.36307												518
																								517	3.83351	4.09383	7.6962	5.40104	3.49233	3.98644	3.21303	4.62643	8.43363	3.81361	3.23517	3.57277												519
																								518	3.05318	3.14756	9.43549	7.5905	3.38988	3.35864	3.71589	3.51159	7.01178	4.36934	4.00079	3.08318												520
																								519	3.10851	4.85883	10.5253	5.14485	3.57945	3.58384	3.12874	3.44594	8.6727	3.16771	3.25557	3.4356												521
																								520	3.75468	3.05191	9.19137	7.63282	8.28905	3.67861	3.1402	3.6131	9.71253	3.07684	3.87982	3.48139												522
																								521	3.05617	3.16376	9.71422	11.2472	3.24973	3.18565	3.60677	3.34186	6.50292	5.72432	3.51313	5.05873												523
																								522	3.01954	5.02327	12.7584	5.41327	3.49852	7.71139	3.2484	4.3204	3.22821	4.47451	3.21953	3.25437												524
																								523	3.11936	4.70611	10.4568	6.01722	3.04127	4.43174	3.25067	3.80551	4.70673	3.20262	5.48114	3.56694												525
																								524	4.15073	3.22163	7.66153	9.67201	3.10329	3.89905	3.07307	3.92985	3.3886	3.50545	3.27463	3.44752												526
																								525	3.02205	3.21857	3.29138	8.58631	3.44535	4.58461	3.24266	3.98361	3.03841	4.70378	3.216	3.74362												527
																								526	3.13001	3.61329	3.03611	5.61172	3.7405	4.05665	3.86115	3.36202	3.84974	3.85532	4.47958	3.29722												528
																								527	3.15468	3.0979	12.1996	14.1915	3.95771	3.04532	3.09567	3.82015	3.27834	4.56651	3.48335	3.31274												529
																								528	3.16569	3.09811	8.38213	14.3606	3.83651	3.23043	3.03106	3.12483	3.19275	3.06281	3.25036	3.18352												530
																								529	3.14133	4.04482	7.4111	7.30817	9.09502	4.58957	3.21448	3.03247	5.07544	3.42376	15.4389	3.09245												531
																								530	4.50577	3.70917	6.34176	5.97642	4.83802	3.0348	3.49269	4.50844	8.64011	3.52273	4.95416	3.68624												532
																								531	3.3223	4.24971	6.0913	9.11768	4.54304	3.26422	3.70114	3.02979	14.0832	3.01575	4.17503	3.71309												533
																								532	3.05185	5.10492	11.4213	12.1378	5.32411	3.75812	3.27679	3.62375	10.5346	4.32125	3.82353	3.58452												534
																								533	3.87234	3.27782	9.64489	9.8925	3.71844	6.51669	3.04964	4.00802	7.02039	3.56823	3.26301	3.29918												535
																								534	3.10281	4.03091	3.31538	7.06885	3.13412	3.60409	3.00861	3.45912	10.1289	3.31435	4.46264	3.02747												536
																								535	3.43772	3.59754	3.36517	3.42278	3.24691	6.62089	3.57261	5.11366	9.27085	3.47496	3.33942	3.03403												537
																								536	3.11643	3.61285	4.93112	13.7635	3.45169	9.16869	4.09731	3.11622	9.76417	3.19969	3.30258	3.641												538
																								537	4.07103	3.04542	14.5955	11.0509	5.24745	11.2505	3.01589	3.01898	6.73501	3.12122	3.28773	3.36434												539
																								538	3.16171	3.25084	5.49754	5.97412	3.34538	6.39513	3.19354	4.45017	3.51295	3.46722	3.14367	4.92618												540
																								539	3.31964	3.9338	3.38626	8.9468	3.26114	3.4356	3.13568	3.54138	3.33652	3.76129	4.50004	3.57909												541
																								540	3.23822	4.60237	10.4001	10.8548	3.35166	4.54595	3.76534	3.16012	3.82984	5.53812	3.10552	3.89968												542
																								541	3.00751	3.43975	10.6019	8.79649	3.04881	5.04875	3.13022	3.04028	4.41978	3.31128	3.11338	3.71117												543
																								542	3.17544	6.02089	6.45135	5.77511	9.59784	4.11754	4.48634	3.40465	3.74067	3.22303	3.60586	3.56623												544
																								543	3.4458	3.65042	12.7159	11.9142	3.33433	3.07911	3.64833	3.04979	4.63409	3.08962	3.53134	3.18528												545
																								544	3.28844	3.05921	9.91948	5.09343	3.8412	3.46549	3.3727	3.86978	9.79284	3.8187	3.32802	3.46946												546
																								545	3.31117	3.95113	7.1009	11.2295	5.98855	3.92177	3.12426	3.83316	7.01552	4.27993	3.24725	4.03841												547
																								546	3.05388	3.13845	10.4226	8.64102	3.17293	3.07886	3.09461	3.65548	7.21273	3.32612	3.3661	5.43236												548
																								547	3.6149	6.19741	10.3354	12.8809	3.083	3.66527	3.16722	3.18761	8.90904	4.5541	3.57103	3.96218												549
																								548	3.42166	3.22406	9.37932	5.81556	3.32757	3.50075	4.49909	3.11722	4.30196	3.19326	3.94461	5.29454												550
																								549	3.00468	5.19289	5.32954	5.28172	3.6329	3.38229	3.07332	3.37129	3.28777	3.10324	3.20712	3.9935												551
																								550	3.78949	10.2974	8.99133	6.65557	3.02709	4.41783	3.2307	3.24152	5.30092	3.07054	3.02615	3.8601												552
																								551	3.3881	3.18641	3.34037	8.86234	4.15494	6.70331	3.23994	4.43057	9.58974	3.05984	3.60873	3.9162												553
																								552	3.66698	3.25637	10.1588	11.1107	3.06404	3.72124	3.45208	3.57481	7.92466	3.05975	5.52081	4.40869												554
																								553	3.06571	3.51167	9.85977	11.0156	3.20571	3.19816	3.12952	3.03296	7.58653	3.46976	4.38516	3.32807												555
																								554	3.37331	6.05673	14.0925	6.95013	3.5555	6.05764	4.48926	3.93639	6.76073	3.16263	3.05527	3.01918												556
																								555	3.03311	4.61957	7.9858	6.22175	3.15313	3.00587	4.4609	3.25521	3.71399	3.80864	3.03514	3.95175												557
																								556	3.62132	4.17424	5.4668	12.9917	4.02877	3.55518	3.97164	3.91331	4.33456	5.41971	3.02235	4.465												558
																								557	5.06768	3.23752	3.58046	4.77706	3.74747	5.22369	3.25533	3.58351	13.2886	3.80075	4.54739	4.83102												559
																								558	3.06536	4.65612	8.60402	7.97026	4.25156	7.52344	3.95314	3.37908	6.40288	3.0226	3.66056	4.13551												560
																								559	3.15154	4.86061	3.418	12.3818	3.52199	4.52253	3.39116	3.5021	7.71127	5.78423	3.05603	4.79583												561
																								560	4.43905	4.2218	8.45788	6.93696	3.95026	3.35248	3.00144	4.89756	5.75737	4.93875	3.25055	3.94922												562
																								561	3.10107	3.1017	4.41123	3.95601	3.17703	3.4077	3.5228	3.38514	4.98451	3.72613	3.09825	3.07313												563
																								562	4.21345	3.57593	6.91034	11.0696	3.24395	4.04414	3.66701	4.24626	7.93473	4.76568	3.21721	3.32562												564
																								563	3.65015	5.09958	3.08091	11.1307	3.05077	3.04467	3.0354	3.37858	6.56315	3.65337	3.15141	5.79869												565
																								564	3.34277	3.597	10.3098	10.1099	4.38907	4.16378	3.31589	3.33797	5.4922	3.09365	3.25849	3.64616												566
																								565	3.52296	3.57462	8.99585	8.00289	3.99266	5.1883	3.29827	3.25018	7.90413	3.21327	4.04392	3.069												567
																								566	3.0983	4.05467	14.7138	5.30496	3.75912	3.12265	3.43628	3.18786	9.42497	3.87235	4.20701	3.0224												568
																								567	3.24715	4.41249	3.0245	5.84279	3.15095	4.10724	4.17925	3.18265	6.43034	4.47497	3.35867	6.49619												569
																								568	4.09663	6.26785	9.93333	12.1887	4.00703	3.43759	5.51301	3.55936	4.14294	3.14734	3.19308	3.48187												570
																								569	3.18288	7.52247	4.1987	4.0425	3.09812	3.49242	12.1024	3.34155	5.07162	3.53661	3.17625	4.2499												571
																								570	8.99238	8.28604	5.05323	10.4623	4.81328	3.51193	8.01778	3.2343	4.40223	4.70309	3.49229	3.16035												572
																								571	4.10652	5.16358	4.87366	8.15913	3.67206	4.06218	3.19782	3.38465	3.0072	3.32749	3.01795	3.52964												573
																								572	3.1542	3.75302	7.1883	4.42819	5.22268	4.06298	3.52096	3.13219	3.96654	3.57403	3.3827	4.75609												574
																								573	3.08218	9.93139	6.80304	8.4127	3.03677	5.22805	3.02378	5.14319	3.36092	3.25114	4.03062	5.37851												575
																								574	3.10665	9.82148	3.8609	4.9465	3.08618	3.19303	3.10811	5.28039	3.02385	3.41462	3.87447	4.82334												576
																								575	3.67417	4.44835	3.05517	3.28926	3.35399	5.30742	3.00752	3.00899	4.05713	3.30172	4.12908	3.86359												577
																								576	3.22344	9.21709	4.10917	6.75712	3.18765	3.06943	3.10113	3.01771	3.02396	3.26705	3.44018	3.17067												578
																								577	5.418	3.24422	10.6356	8.06922	3.67973	5.21486	3.42743	4.80426	3.38359	3.38244	3.01701	4.58377												579
																								578	3.44752	3.21909	11.9301	10.1473	3.41872	3.93745	3.34896	4.08826	4.3408	3.97715	3.76956	3.4868												580
																								579	3.11757	3.15226	11.7152	5.54355	3.38357	4.53654	3.07361	3.1916	4.32054	4.62299	3.62659	3.5741												581
																								580	3.00508	3.22539	11.0782	4.97527	4.47035	3.27208	3.48274	4.86729	3.05559	5.37407	8.41613	4.71782												582
																								581	3.26467	3.4555	14.7034	6.05426	5.03939	3.0996	12.9981	3.23761	3.76871	6.26013	3.71241	4.25782												583
																								582	3.43022	3.60076	10.2264	8.06532	3.21163	4.23181	3.52959	3.88017	3.25274	3.65871	3.25914	3.64812												584
																								583	3.30072	3.16294	10.2851	6.0282	3.30279	3.25672	3.44449	3.63653	4.01664	4.46463	3.55531	3.76704												585
																								584	3.15082	4.42714	9.93956	12.2375	3.09111	4.99312	3.02535	4.02814	4.02471	3.17331	3.54502	3.42458												586
																								585	3.09454	3.15974	3.88211	15.2783	4.2593	3.54414	3.09806	3.77148	12.6566	3.05855	4.38491	4.94276												587
																								586	3.02477	11.3573	4.22154	4.00029	4.37927	3.47361	3.67936	3.05006	3.15159	4.10478	4.70229	4.49217												588
																								587	3.03883	3.00341	5.8151	13.1525	4.29017	4.7641	3.29732	3.66024	3.04543	3.13673	3.77273	5.60991												589
																								588	3.20579	3.62486	6.47148	8.90756	3.09852	3.32715	3.28279	3.26815	3.86751	4.27738	4.35304	4.96549												590
																								589	3.66523	3.1873	4.03803	5.45762	3.6445	3.03023	3.16493	3.14867	3.79335	3.59536	3.67471	3.33618												591
																								590	3.64889	5.66309	4.00125	3.4754	5.72509	5.16124	3.42652	3.27635	3.5161	5.81239	3.01798	3.60606												592
																								591	3.34239	4.21758	3.69219	3.24705	4.38031	3.02786	3.27536	3.26667	4.51625	3.9801	3.07694	3.39218												593
																								592	3.17301	5.00591	6.46717	7.98897	4.54805	4.32541	5.42268	3.21035	3.44049	3.33976	3.36334	5.29186												594
																								593	3.47949	5.14809	14.5041	5.16608	3.53387	3.03612	3.00287	3.87676	3.15308	4.33259	3.01896	3.51237												595
																								594	3.1756	3.83603	3.20498	10.5357	3.85335	4.11081	3.71599	3.79819	6.3222	3.1528	3.202	3.81373												596
																								595	3.15266	9.45105	17.3041	6.84992	3.99006	3.70244	3.69275	3.04153	3.82646	4.01095	3.86399	4.61399												597
																								596	3.1787	4.19655	9.72572	7.35467	3.51371	3.24319	3.82269	3.85652	4.73477	3.41242	3.59227	3.34874												598
																								597	3.25215	3.30043	15.2501	6.32098	4.06803	3.88827	3.60315	3.29537	8.77834	3.4626	3.2119	3.54157												599
																								598	3.70281	3.46914	11.1492	3.67426	4.54468	4.73847	3.14426	3.07627	6.95152	3.90957	3.05968	3.07936												600
																								599	3.37513	4.33043	10.097	8.83147	4.0531	3.84183	3.11798	3.24492	9.32165	3.64209	3.57605	3.22186												601
																								600	3.93226	3.51381	5.01706	7.6653	3.35346	4.61727	6.83308	3.1924	4.94869	5.16448	3.39587	3.49												602
																								601	3.30239	3.66909	3.02399	12.2843	6.19061	3.59357	3.92636	3.30064	3.12129	3.68921	7.35748	3.88059												603
																								602	3.51554	5.16345	16.4836	7.50508	3.33303	5.02146	4.20195	3.92328	3.24471	4.33513	3.46527	3.81992												604
																								603	3.73822	7.79594	3.0755	6.08122	3.66329	3.28144	3.01788	5.89955	3.75534	3.00243	3.14232	4.01109												605
																								604	3.317	4.86556	7.18257	9.84037	3.59539	6.40801	3.57886	3.37048	3.0504	5.85183	3.15228	4.32991												606
																								605	3.0624	6.32659	17.6461	7.4699	3.78073	5.13551	3.16672	3.77807	3.35754	5.09229	3.13217	4.8851												607
																								606	3.41929	3.13393	3.37838	8.26694	4.38186	5.11454	3.57337	3.39783	6.08736	4.63249	3.17705	5.88072												608
																								607	3.18532	3.43648	12.8806	12.4378	5.21646	3.60927	4.84703	3.65622	4.9799	4.5074	3.20328	3.32321												609
																								608	3.57039	3.22363	5.24316	9.31121	3.77043	4.72402	6.08907	5.05901	5.57483	8.62254	3.23674	5.32062												610
																								609	3.09766	3.14556	3.26773	13.0627	3.02203	3.0614	3.40823	3.08317	4.8557	3.66449	3.20914	5.04742												611
																								610	3.5457	4.24462	4.35504	3.69159	3.00348	3.08747	7.90133	3.06534	5.65715	3.65975	3.37194	3.43952												612
																								611	3.0884	4.23301	16.4093	13.6352	3.43044	3.75897	3.13669	3.61362	3.47526	5.03508	3.42341	3.35823												613
																								612	3.13849	3.37101	10.7294	11.9335	4.13747	3.05963	3.38517	3.66139	3.02816	3.27151	3.60837	3.47472												614
																								613	3.62857	3.10605	5.65266	8.65285	3.42705	3.83371	3.19682	3.10283	3.73495	4.36949	5.15377	3.42466												615
																								614	3.7448	3.68391	7.45086	12.7248	4.03354	3.26195	3.52737	5.00781	3.03883	4.88956	3.17292	3.66013												616
																								615	3.03414	3.75163	10.6777	9.59612	4.57475	3.05937	3.3363	3.41227	3.86222	4.27076	3.58373	3.75748												617
																								616	3.07334	3.4837	11.395	4.13331	3.65493	3.00589	3.66416	4.04525	3.05415	5.32211	3.49422	3.67426												618
																								617	3.07547	3.27057	8.58952	5.7765	3.00737	3.22212	3.01905	3.1443	3.23552	3.00056	3.65791	3.08167												619
																								618	3.10945	3.45277	7.17815	3.81048	4.08892	3.1171	3.17066	3.64748	4.2129	3.88837	3.4461	3.1648												620
																								619	3.34932	7.20795	7.55121	9.09593	3.24955	3.77592	3.95815	3.67751	3.46333	7.57458	3.11008	3.32144												621
																								620	4.11097	7.18055	7.63705	12.955	4.0212	3.42363	4.81479	3.23333	3.14929	3.09655	3.09037	3.74778												622
																								621	3.57187	4.95751	13.6722	7.02352	3.91137	3.06569	3.69746	3.66272	3.54373	3.15454	3.34395	5.23062												623
																								622	3.37897	5.66642	12.1667	9.32952	3.96041	3.3931	3.01355	4.24561	5.15415	4.07119	3.42497	5.4032												624
																								623	3.44134	4.15633	11.397	12.7934	5.19452	3.65227	3.02604	3.97271	8.67614	5.77722	3.33097	4.75798												625
																								624	3.03058	3.30173	3.92166	6.78326	3.69559	5.43609	4.31792	3.41043	3.20801	3.06452	3.03994	5.1087												626
																								625	3.82285	3.07597	3.38591	12.452	4.00554	8.13817	3.45879	3.8361	6.06197	5.61605	4.117	3.97616												627
																								626	4.36235	3.41225	9.2897	7.20658	4.57141	3.8296	3.00105	3.98187	5.37527	3.16336	3.00288	4.64396												628
																								627	3.29618	3.0265	11.5811	10.6396	3.21412	4.1044	3.1133	3.30256	3.63754	3.32467	3.88325	4.23869												629
																								628	3.72241	4.23387	11.7098	12.426	3.03943	4.291	3.03827	5.03044	3.5909	3.03786	4.21342	4.25732												630
																								629	3.65797	3.71913	6.76401	9.05445	3.6066	5.76707	3.30498	4.79527	3.0307	3.20217	3.46656	6.01194												631
																								630	3.09808	5.03025	10.515	12.7109	4.73235	4.20699	3.0079	3.0561	4.48823	3.19409	3.13467	3.17221												632
																								631	3.66087	3.48015	13.8239	9.85353	4.24576	3.71173	3.21238	3.54026	3.36726	4.2557	3.02072	4.88874												633
																								632	3.34929	3.95276	8.84275	7.06127	3.27484	3.32166	3.50598	4.36543	3.18701	3.49525	3.35214	3.10864												634
																								633	3.34826	6.04398	3.53433	8.05842	3.83055	6.2604	3.22239	3.69869	3.26573	5.25746	3.15363	3.7936												635
																								634	3.04427	3.18927	6.47951	9.78869	3.01799	5.03196	3.13824	3.56093	3.54462	4.48465	3.13754	3.33919												636
																								635	3.2104	4.57417	3.26097	13.18	3.0971	5.23578	3.53147	3.34702	5.27419	4.31768	3.26555	6.47049												637
																								636	3.44472	3.22538	6.56268	5.7557	3.07	3.43406	3.05739	4.3146	4.33002	3.75781	3.06839	3.34419												638
																								637	3.40265	3.24135	3.80195	14.2129	3.52564	3.00947	3.39034	4.65013	3.11718	4.5274	4.0123	4.52894												639
																								638	4.0361	3.59473	4.85992	5.08123	7.87454	4.018	3.16463	4.19028	3.44146	4.05709	3.77716	3.21027												640
																								639	3.18023	3.61501	4.8246	5.92743	3.89265	7.69625	3.42728	3.31017	4.29649	3.53103	3.27044	3.31708												641
																								640	3.64819	3.68017	4.00736	9.40764	3.22222	3.06315	3.35	3.08328	4.82635	4.10805	3.84277	3.0991												642
																								641	3.44555	4.98758	7.5762	8.3753	4.87473	4.91716	3.07488	3.06644	3.59824	3.60666	3.33195	6.88941												643
																								642	3.07116	3.17418	9.49623	5.60118	3.5886	3.08676	3.47445	4.80258	4.65337	4.78112	3.24491	3.60538												644
																								643	3.59688	3.21857	12.735	10.8861	3.10235	4.25217	3.66475	3.67646	13.2714	5.30292	4.27111	3.41206												645
																								644	3.06659	4.97218	4.23797	11.1901	3.40676	5.6007	3.00302	3.46687	3.95528	3.59426	3.43958	3.00779												646
																								645	3.12356	3.56515	11.8918	5.0265	3.14301	3.9359	4.28148	3.52177	3.88337	4.36537	3.02975	3.79567												647
																								646	7.37996	4.05329	12.4338	14.3938	3.42382	3.07805	3.3649	3.15698	4.40695	4.81083	3.54826	3.9009												648
																								647	3.85267	3.50168	7.64201	5.27557	3.3189	4.68015	3.63309	3.59263	11.4733	3.71881	3.29654	3.54035												649
																								648	3.24658	3.66677	3.17308	5.60203	3.21631	5.08528	4.04633	4.1129	5.24836	4.50565	3.14725	3.68218												650
																								649	3.14058	3.30688	3.40755	5.40403	5.64991	4.19344	3.07246	4.42572	8.5564	4.57581	4.38761	3.39324												651
																								650	3.39775	7.73644	3.17002	14.749	3.59204	7.03675	3.46805	3.12404	3.05149	4.61141	3.2501	4.72044												652
																								651	3.11041	3.82845	3.46963	7.00201	3.44113	3.93686	3.22813	3.27076	3.05569	4.17392	3.13165	3.79858												653
																								652	4.19449	3.75093	3.34607	9.07151	6.72138	3.29153	3.70271	3.34729	3.56379	8.72915	3.36575	4.21984												654
																								653	3.46464	3.43164	3.66597	9.59456	3.05122	5.28846	3.50455	3.23634	3.51218	4.49655	3.17945	4.41563												655
																								654	3.20959	4.19082	3.87172	6.66635	3.25694	8.00968	3.74045	8.23308	3.01904	3.11381	3.35084	3.13888												656
																								655	4.37634	4.55055	3.64126	11.2264	3.92144	7.90051	3.35464	3.25198	3.47446	5.11736	3.6039	3.13177												657
																								656	3.24933	3.79869	4.72759	7.48566	3.39262	3.83671	3.24061	7.28417	3.8508	7.69019	3.0869	3.75832												658
																								657	3.0262	3.65491	8.88247	12.4031	3.69754	5.49136	3.33923	3.79556	5.02333	6.92889	3.33593	3.75529												659
																								658	3.03161	3.14714	3.92328	12.4024	4.9348	3.21902	3.62169	9.91134	8.87493	4.8637	3.53405	4.0221												660
																								659	3.76313	3.59174	5.40298	10.8818	5.26016	5.00817	3.64286	3.18764	5.22455	3.75784	3.57444	4.62677												661
																								660	3.59185	4.18848	3.3386	11.4905	9.87382	3.21765	4.43082	3.16699	3.3711	4.84464	3.11168	3.25546												662
																								661	3.39364	4.25215	3.8664	11.8377	3.25791	3.1204	3.01082	3.27364	3.09156	3.04523	3.72378	3.16233												663
																								662	3.0489	4.10993	3.03829	5.45025	4.29606	3.96788	3.01241	3.48107	4.79878	4.00064	3.49528	3.03216												664
																								663	3.32467	3.00019	3.2881	11.9739	4.44941	3.4177	3.46269	3.12766	4.33281	3.11446	3.42328	3.72313												665
																								664	3.45868	4.70548	6.29427	7.80498	3.65734	3.13498	3.44177	4.49449	6.54498	3.04997	3.67533	4.79157												666
																								665	3.05798	3.69409	11.6809	10.523	3.03683	3.28472	3.05352	3.31541	6.12737	3.55353	4.28239	6.52833												667
																								666	5.88967	3.08682	3.08444	7.352	3.23204	4.05937	3.64244	4.16942	10.0885	3.49426	4.22094	5.10154												668
																								667	3.43714	3.67689	3.35875	5.87977	3.38871	4.57219	3.15989	3.16527	3.61406	3.86172	3.97975	3.02429												669
																								668	3.4851	3.68063	7.10956	10.6242	3.59352	3.53631	3.09938	3.56138	3.0096	3.61009	4.3019	4.03388												670
																								669	3.4392	5.1967	10.8308	5.12008	3.26399	3.58776	3.45713	4.6899	4.07039	3.02497	3.42302	3.89611												671
																								670	5.87553	3.38606	13.2926	9.31913	3.34434	3.46573	3.10191	3.14084	4.00057	4.0519	3.75522	3.03424												672
																								671	11.0171	3.69406	13.7428	9.4138	13.9674	4.97486	3.22024	4.40395	3.28885	4.27091	3.27122	3.57168												673
																								672	3.37348	3.04005	6.82137	12.2221	3.61943	3.79923	3.59912	4.39134	3.09219	5.01427	3.36808	3.71322												674
																								673	3.00343	5.05705	4.58966	8.74611	3.37258	4.34317	3.29803	3.0974	8.0716	3.08842	3.13022	3.58967												675
																								674	4.2603	4.11561	3.53221	7.34656	3.82795	4.45509	3.39798	3.16649	4.79387	3.23032	3.18227	3.15132												676
																								675	3.15231	3.41842	10.6307	6.21146	3.0845	3.23404	3.26826	3.25574	3.20152	4.71797	3.49633	3.05429												677
																								676	3.0599	3.56129	12.6556	6.44807	3.14421	4.52425	3.33299	3.70217	3.43859	4.1265	3.27445	3.39595												678
																								677	3.32283	3.18855	12.8963	5.43778	3.35639	3.52388	3.77529	3.36002	3.00546	4.54411	3.07447	4.80516												679
																								678	3.10888	5.43081	5.65136	11.772	3.28627	3.7904	3.36654	3.09787	7.89988	3.22421	3.06385	6.80619												680
																								679	3.88342	3.08923	12.3245	6.00811	3.93013	4.44413	4.26385	3.79734	3.04248	3.99429	3.45293	4.45081												681
																								680	3.51746	3.28916	3.17436	9.2027	3.58509	3.00837	3.42596	3.41564	6.07113	3.26493	3.09261	3.32024												682
																								681	3.79538	3.24111	6.61183	6.21623	3.1377	3.46164	3.24651	3.00097	7.0259	3.76474	3.63807	6.43285												683
																								682	3.13384	3.48334	7.61532	9.20455	3.74288	4.47126	4.64928	3.70689	6.33378	5.33973	3.01327	4.08983												684
																								683	4.1512	3.48763	8.02265	6.28066	3.12545	3.37822	3.13117	3.9819	4.19571	3.88018	3.17926	6.78792												685
																								684	3.62421	5.81149	16.622	5.96541	3.77166	3.81395	3.02948	3.70633	4.28055	6.37733	3.32058	4.11486												686
																								685	3.29615	3.30381	4.11077	7.80741	3.18759	3.28326	4.47112	3.99955	5.21882	4.11875	3.35907	4.50128												687
																								686	3.80942	3.58056	10.9465	10.6947	3.88543	3.20933	3.31715	3.22061	3.40322	3.0066	3.4071	3.02592												688
																								687	3.37701	4.28159	10.4932	5.13448	3.77385	4.03885	3.67177	6.24198	11.6939	3.57949	3.22702	3.2732												689
																								688	3.36078	5.11439	12.6395	4.41884	4.64737	7.12919	3.69323	4.44141	3.21242	4.1876	3.99383	4.36817												690
																								689	3.56248	3.00691	12.9414	3.39677	3.09198	3.44518	6.90714	3.0278	3.23008	4.21173	5.30766	3.11391												691
																								690	3.21338	8.93919	13.2797	3.4859	3.54241	6.10642	3.72938	4.69247	3.10104	4.89397	3.34882	3.08718												692
																								691	3.05187	4.90538	3.6619	3.56182	3.74436	3.86455	3.22094	5.55309	3.12271	3.13964	4.08928	3.89554												693
																								692	3.34003	9.72689	10.4317	6.60227	3.73079	3.13756	4.97915	3.38186	3.63332	3.09827	3.15755	3.26772												694
																								693	3.19245	9.02337	8.76031	10.3687	3.51409	4.13706	5.61275	3.57918	10.1656	3.69872	5.13093	4.23283												695
																								694	3.04716	5.21587	14.8245	4.5962	3.21585	3.25002	3.01211	5.1649	4.54496	3.53226	3.2426	3.39801												696
																								695	3.11148	7.49637	12.3229	6.79368	3.38072	3.48728	3.93301	3.89516	7.13899	5.59297	3.2853	3.20282												697
																								696	3.70119	3.41639	9.74109	12.1878	3.31306	3.57161	3.25401	3.13773	3.02189	4.34996	3.13273	4.40224												698
																								697	3.38641	3.04864	13.7623	7.86634	6.39414	4.15856	3.14799	3.63616	6.26315	3.25989	3.22884	7.51242												699
																								698	5.60056	4.17471	4.14937	3.98418	3.72656	3.3423	3.58119	3.97789	3.67844	3.68038	3.04093	3.04576												700
																								699	4.33867	5.04995	11.6538	7.43462	3.42628	3.54459	3.2262	3.01826	3.48305	4.67501	3.55798	3.02777												701
																								700	3.01934	3.51874	11.4958	8.31773	3.13302	4.46748	3.52341	3.14776	3.89985	3.2655	4.52259	3.11883												702
																								701	3.40016	3.01555	11.4476	9.18473	3.63577	3.33979	3.39124	3.10862	4.60571	3.58349	3.47639	3.17566												703
																								702	4.66338	3.05715	10.8632	4.76144	4.15646	3.75528	3.26902	3.37009	3.20935	3.00555	3.22656	4.68128												704
																								703	3.04197	3.98496	8.22676	6.75685	3.1112	3.19782	4.72512	3.43003	6.82855	3.02174	3.03742	4.93986												705
																								704	4.11288	4.50573	11.6637	8.56746	4.24504	4.75267	3.1642	4.36607	4.87924	3.52186	3.3305	3.20236												706
																								705	3.02901	5.37035	12.072	11.1707	3.60728	4.23517	3.91123	3.06472	5.72607	4.94988	3.06004	3.34215												707
																								706	3.37998	3.84275	3.77981	5.54086	3.8	8.03881	3.70116	4.17389	4.10156	3.58349	4.02403	3.05422												708
																								707	3.19775	3.83983	3.08643	7.15937	3.74107	3.5127	3.07726	3.28581	3.2334	5.26787	3.0287	4.39005												709
																								708	3.20543	3.49034	5.83424	6.7044	3.33761	6.23428	4.14568	3.51593	5.35826	4.51226	4.21822	3.97164												710
																								709	6.51252	4.20429	10.3336	4.72594	3.38896	4.33438	3.07502	5.06595	4.50026	5.64705	3.6722	3.63161												711
																								710	3.51939	3.10629	4.51489	9.01048	3.37696	5.23109	3.16677	3.74213	6.45025	3.0337	3.21683	3.11732												712
																								711	3.43861	3.14823	16.2514	9.51594	3.58863	7.22479	3.04383	3.49424	3.02353	4.10987	3.78088	3.14973												713
																								712	4.25382	3.13749	8.65048	4.48267	3.87165	3.35895	3.15959	3.10719	4.38165	3.07979	3.25697	4.41409												714
																								713	3.50474	13.4553	13.7611	11.7607	3.39834	3.75113	3.25954	4.12362	11.3501	4.91447	3.31235	3.1909												715
																								714	3.05454	5.7293	14.0749	12.2153	3.92605	3.13747	3.71591	4.27321	7.10149	4.82068	3.01792	3.77596												716
																								715	6.70143	3.31877	7.04371	3.06802	3.58323	3.86457	3.25769	3.33471	4.44918	3.22959	3.3629	4.73487												717
																								716	3.66052	4.33611	7.15352	4.15156	3.24344	3.65415	4.04921	3.20403	6.03452	4.41442	3.12426	3.06903												718
																								717	4.38504	5.54026	3.65748	7.56887	4.18543	3.4327	3.21653	3.49578	3.48352	3.06392	3.14018	4.40213												719
																								718	3.25762	3.42862	13.2369	3.69933	5.16436	3.59868	3.07433	3.0316	8.6895	3.71966	3.21995	4.18507												720
																								719	7.35104	3.05985	10.8292	15.233	3.71755	3.79827	3.25957	3.46008	3.04935	4.41778	4.59617	3.66749												721
																								720	3.68954	3.80117	7.87952	7.60393	3.16249	3.16906	3.88062	3.54605	3.03269	3.14876	5.06665	3.00734												722
																								721	4.065	5.35533	4.67003	3.60361	4.11517	4.31897	3.17658	3.06903	3.87894	3.4853	3.05446	3.02992												723
																								722	3.70979	4.707	13.2677	3.96812	3.28854	3.11767	3.78501	3.04946	3.16225	3.81301	3.14588	3.9658												724
																								723	3.3994	3.41081	8.30617	4.93831	3.15683	3.93114	3.52647	3.55088	7.31247	3.5539	3.1911	3.62316												725
																								724	3.05789	3.01258	3.06881	3.18702	3.33573	4.03726	3.05752	3.31418	4.25438	3.56674	3.41137	7.48763												726
																								725	3.45032	3.55405	3.63339	4.57391	3.95671	3.15128	5.0793	3.70143	3.1829	4.26542	3.07898	4.39039												727
																								726	3.23001	4.43478	3.04032	3.87559	3.48511	6.02606	3.59068	3.22572	4.3828	5.894	3.42311	4.64682												728
																								727	3.59289	4.9777	6.49926	3.85246	3.11823	4.25703	3.63575	3.00108	3.98301	3.28694	3.49993	3.36516												729
																								728	3.37928	3.71609	13.7012	3.27023	3.29036	4.90962	6.42014	4.05156	4.40292	3.09938	3.77001	4.43712												730
																								729	3.49452	3.58016	11.9135	3.06554	3.03002	3.31859	6.12011	3.67123	3.14892	5.23518	3.26745	3.46967												731
																								730	3.00941	3.07938	10.2905	3.44634	3.05279	3.27997	3.48671	4.44209	5.04472	4.24397	3.63822	3.10476												732
																								731	3.51153	4.0842	4.50797	3.91853	3.59484	3.50248	4.63808	3.03455	6.86711	4.09579	3.15813	3.23943												733
																								732	3.7877	3.0076	12.004	3.3542	3.49253	3.03294	5.54234	5.82961	4.07968	3.62491	3.40521	3.02332												734
																								733	3.03925	3.02759	14.3277	3.14211	3.83083	3.70476	3.50657	3.0671	3.13803	3.07848	3.58126	3.47504												735
																								734	3.91094	3.26186	8.85262	3.78018	3.53927	3.76597	3.41341	4.06272	4.00169	3.95199	5.21567	3.91646												736
																								735	3.51475	3.21424	7.87519	3.7173	3.24503	3.7871	3.17474	3.109	3.74108	5.40034	4.27675	5.19073												737
																								736	3.97791	3.29862	8.80786	5.41772	4.66213	4.51134	4.51068	3.63264	3.26797	3.95135	3.6978	4.66093												738
																								737	3.61481	3.66376	11.4854	3.9818	3.51719	4.31139	3.46058	4.64868	5.43589	3.37399	3.01411	5.19081												739
																								738	15.8889	4.07475	12.5612	3.96087	4.20053	4.41221	3.46703	3.10459	6.923	4.13841	4.00663	4.04759												740
																								739	3.09168	3.07724	3.08736	4.29045	3.41144	5.87346	3.43473	4.4321	8.1537	4.17072	4.30158	3.96802												741
																								740	3.02973	3.12839	4.20275	3.35126	4.26892	3.43091	3.06709	3.15998	5.01104	3.15779	4.63781	4.30088												742
																								741	3.06024	7.62276	8.34072	3.32882	4.57304	3.27258	3.63599	3.05506	3.20915	3.03701	3.48719	3.97952												743
																								742	3.00989	3.15798	14.3916	3.02197	3.85858	4.18857	3.99048	3.24007	3.13132	3.00406	3.02535	3.16974												744
																								743	4.63655	3.6561	8.46755	3.43547	3.16043	3.58061	4.73067	3.28042	3.48729	3.14562	3.49113	3.3877												745
																								744	8.7886	6.00058	4.88159	3.46078	4.26782	3.24614	3.08945	4.57491	3.02413	4.96893	3.47103	3.65657												746
																								745	3.16001	11.2846	4.55692	4.79159	3.51042	3.1882	3.01681	3.25681	15.3894	3.13924	3.05651	4.18178												747
																								746	4.39185	9.63601	11.8031	4.46751	3.39037	3.70649	3.18739	3.22421	4.03223	4.2082	4.03699	4.6486												748
																								747	3.67567	4.47233	8.00266	5.50159	3.99464	3.23353	3.5015	3.55294	3.10339	3.24891	6.4643	3.21261												749
																								748	3.10408	3.5158	5.98843	3.83834	4.2265	4.86619	3.29452	3.07955	3.1755	4.6516	4.34601	3.93135												750
																								749	3.33139	3.97754	3.80852	3.13659	5.66103	3.77865	3.04788	4.72281	4.64518	3.56014	5.47608	5.27498												751
																								750	3.02015	13.5949	6.6805	3.2049	3.56737	4.63565	3.0317	3.61893	6.64486	4.4036	7.5956	4.55375												752
																								751	3.13228	9.34182	5.44907	3.51573	3.13105	4.01631	5.2273	4.39005	5.35127	4.61354	7.95572	4.08494												753
																								752	3.30886	7.81163	7.40708	4.9978	8.86598	4.68829	3.25189	3.9683	5.71507	3.99676	3.11001	3.53099												754
																								753	3.16945	11.1083	3.05736	4.31707	7.18804	3.33929	3.11819	3.37614	9.84914	3.14194	3.88919	5.47487												755
																								754	3.62028	4.15472	3.29992	3.97734	3.70582	4.52617	3.20161	3.95343	5.52169	5.22048	3.59035	3.35238												756
																								755	3.65113	3.98752	12.1384	3.50437	3.07027	5.02327	4.05776	3.56153	3.22147	3.70359	4.64657	3.54039												757
																								756	4.98784	4.29964	12.1458	3.13358	3.56049	4.28796	3.03711	3.62486	5.44255	4.74124	3.34456	5.21563												758
																								757	3.11022	4.67353	8.98203	3.95505	3.15923	3.34649	3.66647	3.10387	7.41073	4.05501	3.89982	3.94707												759
																								758	3.18113	3.24763	4.10554	3.06419	3.1835	3.07102	3.17189	3.62843	8.90828	3.11347	3.12558	4.22743												760
																								759	3.0715	6.09307	3.98471	4.86771	3.3756	3.24369	3.00594	3.30512	5.19589	3.28446	3.73837	4.27099												761
																								760	3.65131	3.95381	10.2135	4.37642	3.10802	3.27932	3.00451	3.48416	3.04488	7.07007	3.12558	4.15923												762
																								761	3.07576	5.01136	3.43459	4.08743	3.08573	3.57014	3.01651	3.09976	3.094	4.96478	3.06571	3.65592												763
																								762	3.07057	5.19949	11.251	3.02479	3.17492	3.04633	3.10845	10.279	3.14664	3.32065	3.86892	4.27597												764
																								763	3.64181	3.41025	5.95389	3.23692	3.49127	3.30429	3.16616	3.28737	3.63434	3.19366	3.24919	4.14043												765
																								764	3.45998	3.01547	7.30092	3.09983	4.28421	3.48262	3.51305	4.27583	3.25416	3.70591	4.572	3.83816												766
																								765	3.5965	3.09399	3.66712	3.82676	3.10965	4.33011	4.6174	4.09968	4.0488	3.08942	3.2598	3.82181												767
																								766	3.67075	3.00679	7.64942	3.00905	3.0495	3.69547	3.09947	4.24874	3.18841	3.23254	3.22954	3.03339												768
																								767	3.35252	3.27381	10.1807	3.10819	3.07068	3.49882	3.10725	4.26657	7.11294	3.24293	4.74597	4.07672												769
																								768	3.25611	3.18253	13.849	3.61267	4.01835	3.32056	3.19733	3.04163	5.35022	6.28894	3.06287	3.92896												770
																								769	3.1634	3.37291	3.20431	4.88872	3.40401	4.44527	3.30421	3.68561	6.81849	3.55366	4.11479	4.14833												771
																								770	3.12971	3.36415	3.50413	4.65817	5.62281	7.58001	3.39713	3.49579	3.65422	3.82241	3.71325	3.76778												772
																								771	3.21695	9.05992	4.52734	5.82892	4.43103	3.58042	3.517	3.08293	5.02605	3.13623	3.17041	3.31162												773
																								772	3.16681	5.185	6.26666	4.68362	3.43965	6.84335	3.21428	3.69606	11.6183	3.26499	3.66542	3.39937												774
																								773	3.18484	3.86637	6.375	3.05283	3.19269	4.35121	3.41907	3.10546	4.47989	3.36231	5.17908	5.01475												775
																								774	3.08817	3.89881	5.89627	4.49476	3.82407	3.58049	3.40507	3.7187	3.76811	3.38421	4.41812	3.46071												776
																								775	3.27828	6.53775	6.1302	4.33707	3.08214	9.07831	4.16636	3.75099	11.3944	4.10512	4.72586	4.29928												777
																								776	3.41283	3.05219	6.05522	3.30798	3.27244	3.28449	3.42569	3.19185	3.48349	5.36296	4.02162	4.17392												778
																								777	3.65285	4.30015	4.94634	3.68909	3.00702	3.42884	3.40793	3.19782	3.13	3.42504	3.17817	3.60612												779
																								778	3.01231	3.42471	4.32139	3.81364	3.05869	5.58349	3.27967	4.17638	12.532	4.78412	3.16302	3.75912												780
																								779	3.21451	7.15987	6.08244	3.98119	3.7354	5.40423	3.23822	3.09076	7.04002	4.09053	3.89855	3.35618												781
																								780	3.23843	3.6606	4.74042	4.17212	3.06288	3.67298	3.42516	4.022	3.05543	3.46038	3.65536	4.21073												782
																								781	3.00679	4.59693	7.5476	3.53468	3.31597	4.28698	3.29331	3.01932	3.01778	3.10401	3.97369	3.28663												783
																								782	4.3096	7.43746	5.32508	3.39114	4.35693	3.17929	3.96486	4.25636	6.22897	3.98221	4.22917	3.83221												784
																								783	3.20398	4.43068	4.81981	3.62957	3.05025	5.52058	3.46653	4.09457	4.34368	3.21022	3.51966	4.00394												785
																								784	3.08704	6.21759	5.65339	3.02784	3.32809	3.05982	3.62966	3.04128	10.3653	8.48028	3.1675	3.07915												786
																								785	8.97779	3.4128	3.26779	3.57664	3.15547	3.05647	3.35439	3.04015	3.04423	6.43969	3.92866	4.85247												787
																								786	3.44683	5.47277	4.43586	5.76169	3.33548	3.67153	3.00838	4.94145	3.36522	3.03421	4.07604	4.82201												788
																								787	5.47317	3.23313	7.15221	4.00849	3.19699	3.66758	3.19554	3.14732	9.22108	4.46964	3.59977	4.87107												789
																								788	3.10068	3.17896	6.22778	3.14729	4.10055	3.35256	3.28191	3.17933	6.3029	3.19409	4.07498	3.05267												790
																								789	3.42311	3.07046	6.6144	4.54176	3.09486	3.08288	3.86509	4.15213	8.54963	3.42272	3.16452	4.97109												791
																								790	3.2273	3.66167	6.94867	4.74626	3.56688	3.4922	3.3715	4.36607	3.00641	3.06148	3.14438	3.0657												792
																								791	3.2479	3.77692	5.82066	4.40288	3.10273	4.66028	3.06732	3.71221	3.23375	3.44977	3.36153	4.12341												793
																								792	3.1503	3.23792	6.68762	4.42661	3.59256	3.03978	3.21212	3.97019	3.03863	3.30325	3.73169	3.73443												794
																								793	3.24948	3.07641	6.03483	5.21954	3.17338	3.8148	3.45325	3.12611	3.57793	4.759	3.01827	3.06309												795
																								794	3.62741	3.02183	8.24771	3.37044	3.62828	3.3552	3.2159	3.46496	3.03822	3.30121	3.1595	3.08784												796
																								795	3.59382	3.76416	5.04291	3.21363	4.45091	4.20538	3.04743	3.44053	3.2199	3.93936	3.25823	4.00097												797
																								796	11.8464	3.2498	3.03093	4.13819	3.09474	3.55453	6.3774	3.42812	11.0487	6.69219	3.11869	4.00279												798
																								797	3.21555	3.23311	4.72223	3.27012	3.2401	3.28432	3.39036	3.05059	4.25353	5.44832	3.51444	3.78213												799
																								798	3.33714	3.96892	5.61769	3.71546	3.06574	3.01042	3.32892	3.09391	3.42647	5.86781	4.15854	3.41448												800
																								799	4.53513	4.08959	4.66631	5.26684	3.58577	5.00218	3.25959	3.01114	3.95535	3.61238	3.03156	3.27942												801
																								800	3.17428	3.02968	6.47808	4.42501	3.10035	3.26077	3.64082	3.12156	7.28071	3.62759	3.06857	3.40144												802
																								801	3.14187	8.97329	5.21341	4.11118	3.55031	5.24793	3.61843	3.26286	5.33147	3.63289	3.03404	3.8682												803
																								802	3.37004	3.77103	6.12672	3.49846	3.07358	5.676	3.13628	3.23206	9.49601	4.44891	3.13696	5.07838												804
																								803	3.97511	4.69358	6.18801	3.71066	3.0086	3.67599	3.28766	3.15671	4.84563	3.46567	3.52189	4.10371												805
																								804	3.04281	3.41685	4.99468	5.55842	3.81709	3.25433	3.59398	3.81086	5.39341	3.20592	3.41513	5.17046												806
																								805	3.28002	3.7029	4.63384	4.12176	3.73295	4.06145	3.59808	3.97099	12.3513	5.53896	3.72226	3.633												807
																								806	3.24479	3.57845	7.30606	3.55496	3.00185	6.31928	3.09619	4.17765	3.29653	3.23315	3.16367	3.7829												808
																								807	3.03255	5.84977	6.56052	3.00812	4.12033	6.8075	3.70938	3.0123	9.42787	3.16869	3.19526	4.12501												809
																								808	3.5903	6.23037	7.47873	5.05513	4.38963	4.18414	3.3882	3.66502	11.3909	4.26036	3.29918	3.38589												810
																								809	3.00986	9.33273	7.72687	4.26055	3.07154	3.64883	3.42973	3.21169	3.29091	3.8159	3.54498	4.5447												811
																								810	3.14911	4.47222	5.78445	3.21503	3.73088	5.05351	3.1587	3.2259	3.19938	3.84641	5.42501	3.91365												812
																								811	3.1438	9.04388	5.33432	4.61103	3.13524	3.36726	3.23133	5.05064	3.59845	3.63804	3.09151	4.39807												813
																								812	3.11455	8.14588	3.1427	3.57285	4.75806	7.62989	3.1451	3.8783	3.29377	7.44467	3.57729	3.13319												814
																								813	3.55493	3.70856	5.99544	4.55877	3.35456	3.10547	3.76082	3.20979	8.84856	5.57936	3.25727	3.31068												815
																								814	3.17386	3.10619	6.51002	3.39803	3.12239	3.97988	3.37242	3.8435	6.26566	4.24148	4.59283	5.20802												816
																								815	3.26019	5.87639	8.39698	3.58093	3.12702	3.32162	3.32343	3.76541	6.88781	5.8678	3.13596	5.54774												817
																								816	3.17182	8.30876	7.23234	3.96193	3.56073	3.16398	6.00431	3.20524	3.00493	3.34401	3.73023	3.77772												818
																								817	3.50745	5.78083	8.5193	4.73241	3.52393	3.43659	3.80708	3.77519	3.0219	3.10828	3.20716	3.46727												819
																								818	3.28693	7.44228	8.25631	5.60712	3.12968	5.04593	3.5962	3.0758	4.44159	3.37118	3.09619	3.93066												820
																								819	3.84756	3.44145	3.53792	3.06869	3.02179	6.30512	5.80657	3.67946	3.194	3.40384	6.55057	3.65221												821
																								820	3.55252	4.40495	3.56947	4.02426	3.74228	10.8477	4.70145	3.33792	12.6342	5.03613	3.50072	4.77464												822
																								821	3.94204	3.76887	8.41309	3.17314	3.93809	4.3831	3.14572	3.15691	3.36842	3.58633	3.57823	5.59009												823
																								822	3.15401	3.70897	7.85576	4.27458	3.14948	4.60244	3.81987	3.0855	9.90965	4.21918	5.52429	4.00152												824
																								823	3.94317	3.57642	7.47162	3.49798	3.82494	4.7746	3.14926	3.81082	3.38452	4.29325	7.75493	4.26771												825
																								824	3.54712	3.7127	3.4839	6.07226	3.12909	3.93407	3.24203	3.06916	3.22851	3.03108	4.01022	3.9591												826
																								825	3.10757	4.986	4.72751	3.97842	3.1315	4.11679	3.0674	4.29267	5.65577	3.02918	6.88807	3.32807												827
																								826	4.48128	3.81351	7.23122	3.46001	3.10823	3.50214	3.47654	3.71918	6.18283	3.17424	4.84399	4.55947												828
																								827	3.80595	3.6232	5.47826	4.77444	3.84208	7.25906	3.30555	3.55204	6.09345	5.42512	4.22259	4.16425												829
																								828	3.2479	3.85307	3.43993	4.19129	4.1546	7.73984	4.05465	3.06652	3.45971	4.7293	4.51884	3.08224												830
																								829	6.91318	4.51098	6.90839	4.59251	3.47208	4.14666	4.84601	3.28514	3.49091	5.87085	4.93171	3.75372												831
																								830	6.26132	3.6899	4.30905	3.76221	3.34447	3.90807	3.23946	3.44129	3.2968	5.54925	3.32677	5.71242												832
																								831	3.11242	3.74814	7.50033	3.49075	3.63966	3.8054	3.42544	5.18454	4.11602	3.94384	3.63231	4.34831												833
																								832	4.08812	3.19291	4.88834	4.3099	6.76504	3.10832	3.42465	3.0206	4.2122	3.01189	3.18309	3.69127												834
																								833	3.57402	3.13716	3.90514	4.59304	3.21909	3.28511	3.62819	3.65505	8.28262	3.99414	3.44131	3.1554												835
																								834	3.8745	3.22815	7.37777	4.41074	3.40933	4.33387	3.29655	3.484	5.79467	3.24175	3.6165	4.10853												836
																								835	4.54022	3.02624	6.15891	3.00307	3.25443	3.23743	4.10353	3.90172	3.13181	3.24655	3.10748	3.6603												837
																								836	4.43567	3.0504	6.72802	3.21	4.19532	4.33238	3.71297	3.0076	3.52784	8.27647	3.29745	4.61635												838
																								837	4.30185	3.5971	5.94724	3.0739	3.12104	4.94506	3.4312	3.80586	3.69907	7.7252	3.60477	3.46581												839
																								838	4.02735	3.07438	5.456	4.54904	3.14157	8.84996	3.15184	3.53736	5.97853	7.42163	3.15418	4.41444												840
																								839	3.66937	3.03522	6.32845	3.18557	5.89251	3.43996	3.05558	3.18852	8.63906	3.18193	4.42723	4.31468												841
																								840	3.03761	3.83568	3.02692	3.29954	3.26817	5.82394	3.4455	3.39623	9.47224	3.51187	4.69742	3.05881												842
																								841	3.96326	3.20514	3.86954	3.45723	3.70694	5.07337	3.2081	4.1208	9.41041	3.4279	12.2404	3.00842												843
																								842	3.51303	4.03219	7.93954	4.45723	3.83846	4.67709	3.05436	3.08025	7.28078	3.6898	3.14243	4.58723												844
																								843	3.2186	3.53257	8.34321	3.03903	3.11071	6.03618	3.45746	3.87674	7.37146	3.9699	4.49053	3.20621												845
																								844	10.4309	3.76459	4.13719	3.16372	3.49887	3.18355	3.01672	4.22918	10.5782	3.1798	6.37375	4.66117												846
																								845	6.12943	3.45193	4.55366	3.2115	3.73381	8.70509	3.05521	4.05425	3.91981	3.42094	3.11363	4.08985												847
																								846	3.36786	3.52061	4.36744	3.2274	3.7924	3.60251	3.56139	3.00456	4.16848	3.15259	4.64467	3.48342												848
																								847	3.12626	3.02107	13.9597	3.09625	4.48301	3.81989	5.00209	3.04332	3.12517	4.38708	4.31684	3.17437												849
																								848	3.59537	3.14856	14.9874	3.00512	3.25821	3.1341	3.07002	3.6672	3.49921	3.20241	3.17698	3.05128												850
																								849	4.21544	3.06315	3.0133	3.91571	3.198	3.19375	3.4713	4.40945	7.28502	3.57861	3.03534	5.24937												851
																								850	5.26992	3.23181	3.31947	4.28101	3.40535	3.02454	3.418	3.61687	4.55984	3.4947	4.27502	4.03648												852
																								851	4.04613	4.1216	11.3198	3.12448	3.06503	3.44918	3.73412	5.08022	3.57614	3.18209	3.18475	3.76535												853
																								852	3.1574	3.35676	3.0291	3.33813	3.64712	6.05575	3.23591	3.16347	4.69263	3.96326	3.27288	4.72318												854
																								853	3.19122	3.36736	16.6841	3.28868	3.13838	6.43817	3.08421	3.58791	3.36366	4.2759	3.85752	4.25631												855
																								854	3.11861	3.10037	17.8465	3.75207	3.39184	3.79005	4.20906	3.25022	3.15278	3.04516	4.35397	3.48657												856
																								855	4.04627	3.14364	11.1233	3.48963	3.12072	3.49696	3.19125	5.03508	3.23248	3.95237	4.36829	3.35748												857
																								856	3.92341	3.36576	3.70213	3.72154	3.78625	4.57977	3.38609	5.05212	3.82828	3.61438	3.50329	4.70076												858
																								857	3.66974	3.56755	14.4684	5.63625	3.26204	3.85304	5.05938	4.01983	3.01293	3.11046	3.12174	4.79472												859
																								858	3.34243	3.14912	16.7237	3.31569	3.94116	3.30674	3.22708	3.07933	4.9553	3.53091	3.63777	5.95795												860
																								859	3.16094	3.00146	9.40323	3.07577	3.00729	3.83532	3.5753	3.0451	3.04289	3.0452	3.04855	4.31059												861
																								860	3.81129	3.58389	3.03391	4.00738	3.4495	3.81586	5.12767	3.08956	6.47677	3.15305	4.94828	4.22163												862
																								861	3.0363	3.01978	3.92532	3.07072	3.14985	4.67671	3.46365	6.99047	8.02292	3.10351	3.23105	3.88992												863
																								862	3.11295	3.39718	19.7344	3.0308	3.91177	3.09161	4.3254	3.52034	7.63746	3.04227	3.29866	4.41903												864
																								863	3.97651	3.20992	3.15952	3.22589	3.01071	3.34856	3.35638	3.13735	4.2919	3.01824	4.62892	3.41672												865
																								864	3.85524	3.94869	8.03891	3.54895	3.71923	3.39257	3.57401	3.39044	5.43791	3.39768	3.35837	3.76089												866
																								865	3.3747	3.47189	3.08473	4.21652	4.03041	3.71263	4.51327	6.48933	13.2935	3.15602	3.44985	3.71555												867
																								866	3.37296	3.33357	4.14113	3.90145	3.50033	3.47823	3.24073	3.08929	3.66415	3.5723	3.42335	3.79512												868
																								867	3.43612	3.47788	3.22788	3.17564	3.09664	3.2128	3.15337	3.24194	3.21866	3.09483	3.84313	3.53934												869
																								868	3.90695	3.50801	4.46127	3.28215	3.29116	3.69388	3.54822	4.66102	3.13523	3.17234	3.12679	3.33724												870
																								869	3.15057	3.84237	11.8054	3.72928	3.82414	3.28956	3.24841	3.24352	6.60316	4.82708	3.02547	3.91016												871
																								870	3.35831	3.37763	3.15335	3.1359	3.02201	3.34684	3.39722	3.38855	3.09426	3.12844	3.02498	4.69393												872
																								871	4.22429	18.0604	4.65939	4.6518	4.46352	3.90577	4.06318	3.74318	5.36273	3.55403	3.49682	3.0777												873
																								872	4.03922	3.23406	3.52093	3.97659	3.19989	3.84502	3.53472	3.33596	6.77643	3.688	3.49082	3.72342												874
																								873	3.05554	3.42624	3.69793	4.17477	3.58888	3.78831	3.74187	4.98276	3.9687	4.33847	3.02213	4.03612												875
																								874	4.11401	3.28683	4.58556	5.18969	3.00005	3.48557	4.23992	3.01087	3.05662	4.27512	4.1984	3.19023												876
																								875	3.77394	3.06471	3.21625	3.61236	3.28385	3.37116	3.58693	3.95042	3.14893	3.02593	4.68787	5.18913												877
																								876	4.30213	3.23241	6.64988	3.44375	4.32197	4.30202	3.18426	3.89623	3.33473	3.04912	3.40322	3.12291												878
																								877	3.06542	3.17085	12.0747	4.00767	3.60978	3.14353	3.20002	3.57419	11.0846	3.29293	4.74434	6.40318												879
																								878	3.37066	3.05727	4.29864	3.20493	3.16807	3.37234	3.02752	5.0302	4.74446	4.00383	3.30691	4.0296												880
																								879	4.02858	3.19315	4.95791	3.2984	3.77834	3.66526	3.58955	3.13468	6.24069	3.03363	3.29951	4.85924												881
																								880	3.08214	3.46148	4.82803	3.24437	3.35086	3.44194	3.09403	3.99936	12.7268	3.80111	3.04738	3.17613												882
																								881	3.09244	3.38653	4.72035	4.71797	3.23636	3.19786	3.7533	4.07278	3.3161	4.1379	4.24014	3.08848												883
																								882	3.81173	3.18812	3.17207	3.03517	4.01629	3.15237	3.03778	3.8751	3.43318	3.07956	4.21956	4.84971												884
																								883	3.54435	3.0211	12.1554	5.49592	3.02936	3.25012	3.03755	3.74632	3.24529	3.87904	3.33513	3.38966												885
																								884	3.25562	3.02204	3.72209	6.54343	3.41	5.61936	4.06777	4.51124	10.0455	3.50918	4.3013	3.48702												886
																								885	3.11763	4.05493	13.5266	5.07566	3.36828	6.39465	3.30417	3.02999	5.14021	4.0183	3.51889	4.26496												887
																								886	4.3525	3.02278	3.43623	3.54008	3.71945	4.14487	3.23705	5.58529	3.18314	3.536	3.75254	6.02964												888
																								887	3.0064	3.73549	3.73214	3.19639	4.19539	3.0409	3.09601	5.07187	7.2542	3.02386	3.69922	4.23579												889
																								888	4.26715	5.28866	19.7009	4.16799	3.22371	3.81463	3.76042	3.14816	3.39259	3.86683	3.54903	3.57335												890
																								889	3.68431	5.45067	15.4268	3.25038	3.41023	3.97141	4.0758	3.26445	3.54176	4.22251	3.55688	4.12086												891
																								890	3.04259	4.04431	3.03249	5.49901	3.03158	5.87428	3.50199	5.30874	3.40407	3.10721	3.07088	3.52312												892
																								891	3.51291	3.2263	4.2968	3.37262	4.49576	3.52658	3.08441	6.92777	6.11332	4.64701	3.63259	3.18058												893
																								892	3.59322	3.1935	4.11873	4.15678	3.92793	3.15111	3.79704	6.7609	3.57101	3.39736	3.03978	3.19107												894
																								893	3.7189	3.79902	6.00524	3.55415	3.09925	3.39899	3.23181	6.31281	3.42064	4.89451	3.40464	4.53393												895
																								894	3.18132	3.90286	5.44257	5.6474	3.37751	3.46072	4.67075	3.68732	3.02671	3.71536	3.11266	3.11619												896
																								895	4.45192	4.1523	18.3538	4.51344	5.4111	4.41422	3.16648	3.4047	3.02227	3.54964	3.40495	3.58345												897
																								896	3.00877	4.09687	3.72148	4.58356	3.88786	4.26624	3.33331	3.29822	10.1219	3.31115	3.76891	4.80362												898
																								897	3.13757	3.74899	4.21644	4.00403	3.16457	3.24983	10.052	3.22695	8.41361	3.13624	3.24828	3.14539												899
																								898	3.02589	3.66748	6.71259	4.8479	3.58859	3.27323	3.2295	3.6152	11.4128	3.27558	3.38239	4.57779												900
																								899	3.30639	4.02136	4.62768	3.74182	3.02319	3.2349	4.80542	3.09828	9.10639	4.07831	3.84874	4.17345												901
																								900	3.21775	3.23428	4.35498	6.67238	3.14855	3.31558	3.59944	3.21992	3.72423	4.41891	3.14167	3.2151												902
																								901	4.57287	3.97517	18.7403	3.04536	3.40405	4.08361	3.25776	3.56235	8.81233	3.05196	3.05978	3.14353												903
																								902	3.51588	3.09991	4.02102	3.38838	3.48629	3.93492	3.1068	6.4157	8.18851	4.2917	3.65116	4.81037												904
																								903	3.3063	3.77348	4.0703	3.63914	3.80691	4.42195	4.19595	3.61908	10.9822	3.37218	3.06572	3.02912												905
																								904	4.12509	3.25774	3.49862	3.74116	3.44768	5.01738	3.66123	3.17912	9.44884	3.80305	3.49483	3.3402												906
																								905	3.89428	3.30974	3.17124	4.55199	3.0976	3.91412	3.13545	3.1192	7.94393	3.29034	3.19204	3.31751												907
																								906	3.89045	4.72701	6.72734	4.24926	3.06757	3.59123	3.07276	3.11987	6.31661	3.1575	3.80889	3.37448												908
																								907	3.29953	3.1431	3.77043	3.24627	3.09173	3.11252	3.40168	3.16355	6.66782	3.44172	3.64295	3.15189												909
																								908	6.54546	3.16691	3.45682	3.56631	3.07592	3.16739	3.07502	3.47006	7.16023	3.97678	3.42071	3.31259												910
																								909	4.04016	4.44428	4.34908	3.1739	4.58297	3.55524	3.12967	3.33382	5.8196	3.61486	3.32866	4.00455												911
																								910	3.2916	4.11465	6.092	4.81301	3.5582	3.44074	3.73274	4.05795	3.70959	3.17052	3.27569	7.39168												912
																								911	3.1444	3.31783	15.3682	4.49166	4.12168	7.15884	3.09652	3.4934	7.18322	3.97981	3.31409	4.17205												913
																								912	3.46652	3.24251	3.54624	7.4283	3.83237	3.10492	3.31074	3.22402	6.69917	3.9065	3.06298	3.09595												914
																								913	3.40041	4.0279	4.09864	5.84346	4.00819	3.12694	3.20989	4.39741	8.3218	3.45076	3.03293	3.35255												915
																								914	3.68406	5.62535	17.1365	3.19903	3.22334	3.80333	3.58155	3.42215	11.556	3.18986	3.20989	7.53303												916
																								915	3.10425	5.07232	4.43731	3.81083	3.34694	3.6345	3.02521	3.22824	8.65721	3.19506	3.21977	4.78761												917
																								916	3.404	3.14503	14.715	3.01126	4.08757	3.8658	3.16525	5.09463	9.82699	3.12794	4.11029	3.36672												918
																								917	3.0313	3.49213	4.32122	3.36262	3.39854	3.23547	3.69756	4.15568	8.84528	3.01171	3.93739	4.69929												919
																								918	3.10095	4.1314	11.2632	4.62391	3.74942	3.52061	3.31156	6.06456	3.34652	3.10763	3.26692	4.84263												920
																								919	4.19078	4.47027	3.32639	7.05045	3.33307	3.12956	4.19938	3.93804	4.63464	3.14071	4.80927	6.25384												921
																								920	4.43332	3.63179	6.85322	3.92656	3.92275	4.49485	3.19916	3.48616	4.45393	3.43924	3.65036	3.21708												922
																								921	3.50688	3.10638	17.4898	3.12792	3.69924	3.30438	3.21507	3.13504	11.6429	3.40963	3.26915	3.93077												923
																								922	3.01478	3.8199	3.61666	5.31113	3.09506	3.8538	3.24361	5.41409	11.1687	3.08604	4.14621	6.8754												924
																								923	3.14816	4.02771	3.20301	3.44936	3.95991	3.61556	3.21955	5.70629	7.24914	3.86904	4.12119	5.12008												925
																								924	3.64169	3.11564	16.7132	6.47643	4.71537	3.56065	3.48162	3.89509	7.35497	4.48433	3.85116	5.5894												926
																								925	3.11566	4.05089	5.15655	3.32592	3.63783	3.18099	3.42075	5.42869	5.37754	3.63759	3.99298	4.85833												927
																								926	3.14613	4.2202	11.3534	4.47655	3.62038	3.07376	3.1483	3.81857	6.07627	3.50448	3.12767	3.09435												928
																								927	3.24705	4.34036	8.493	5.0796	3.33411	3.25808	4.77098	4.99266	9.35387	3.81652	3.29801	4.49395												929
																								928	3.75073	3.25701	14.6326	4.6413	3.34644	3.72078	3.06324	4.8601	3.40806	3.39559	3.20422	5.07323												930
																								929	3.10627	5.46902	14.8462	4.19115	3.54524	3.44454	3.20389	3.97704	14.8858	4.2245	3.53685	6.04278												931
																								930	3.90228	3.19895	5.15474	4.59492	3.0202	3.14202	3.25414	5.24717	3.23326	3.09523	3.00219	5.69594												932
																								931	3.18171	3.39083	15.26	4.05065	4.06688	6.21377	5.67585	4.26408	9.97365	4.22748	3.93056	3.10854												933
																								932	4.14971	3.18403	4.64043	3.61319	3.8917	3.48659	6.56626	3.06675	5.39369	4.19763	3.59142	4.42796												934
																								933	3.00834	3.3641	3.45585	3.97878	4.50347	4.31498	5.5322	4.0278	7.53087	3.0091	3.11102	4.31718												935
																								934	4.81147	3.0662	5.55285	4.10016	3.63045	4.88108	4.00492	4.05354	8.37124	3.49328	3.02811	4.76141												936
																								935	3.3828	3.43942	3.22835	6.28232	3.17005	3.86001	3.93292	4.39065	3.5659	3.06469	3.95129	4.0716												937
																								936	3.14389	3.31284	5.75507	3.50326	3.82266	4.73055	3.1543	3.18436	3.14649	4.46145	3.34288	3.92808												938
																								937	3.05552	3.36763	13.7907	4.04108	3.23227	3.62208	3.82617	3.64245	9.00714	3.05705	3.46721	4.15241												939
																								938	3.89397	3.66158	3.6422	4.01346	3.29051	3.98727	3.86277	4.01272	7.91477	3.38621	3.05226	5.29788												940
																								939	3.726	3.1635	3.77055	4.48088	5.90805	3.36999	3.04675	3.26187	5.96409	3.80503	3.02214	4.63028												941
																								940	3.10599	3.35664	4.16342	8.34093	3.53786	3.9887	3.87027	3.57924	6.33417	3.51795	3.68437	3.90514												942
																								941	3.42056	4.59077	3.78286	4.77065	3.14928	3.18373	3.32403	3.39027	9.3171	3.28006	4.52652	3.26111												943
																								942	3.58983	3.63498	4.24518	3.02947	3.7384	3.51028	3.44896	5.6584	7.99179	3.2579	3.00857	3.44725												944
																								943	5.60108	4.36192	3.0995	3.41491	3.44145	4.08952	4.0993	3.4724	9.88802	3.05202	3.51325	6.51793												945
																								944	4.28975	3.60516	17.8446	4.19483	4.77838	5.25593	3.25888	3.87095	8.73609	3.52025	3.21256	5.85142												946
																								945	4.63222	3.12747	6.06848	5.55416	3.52887	3.04406	3.09988	3.98353	6.69206	3.19646	3.31757	3.87006												947
																								946	3.44277	3.2754	3.68653	5.47829	6.46187	4.63379	3.38582	3.44485	6.22976	3.47243	3.07176	5.63641												948
																								947	3.67298	3.80157	4.11394	7.43318	3.75248	4.84065	3.22069	3.73405	3.61374	3.2808	3.79396	4.2045												949
																								948	3.12507	3.01539	4.3082	5.68783	3.12613	3.43812	3.60615	3.37167	5.78436	3.09704	3.66008	3.06213												950
																								949	3.75921	3.12502	4.90229	4.3702	3.44061	4.09974	3.4024	4.65132	3.20093	3.33569	3.17727	4.46677												951
																								950	4.81621	3.29585	9.01704	4.00901	3.00424	4.17671	3.35305	5.06815	4.14663	4.87378	3.37621	3.32986												952
																								951	3.87912	3.9138	7.82732	3.60111	3.65711	4.05156	3.24967	5.44183	6.16608	4.50735	3.20319	4.55954												953
																								952	4.04632	3.53863	12.752	3.95727	3.01304	3.32423	3.15771	3.84654	4.43393	4.59613	3.95519	3.41612												954
																								953	3.2915	3.03082	6.67786	4.75305	3.95383	4.28115	3.47068	3.32072	8.79304	3.34509	4.17515	5.76641												955
																								954	3.03652	3.69657	7.91489	7.22186	3.66965	3.464	3.49441	5.3561	7.54787	3.84732	3.28111	3.31293												956
																								955	3.97704	3.57838	7.84687	6.12814	4.39564	3.02462	3.14897	3.0818	5.25874	3.31666	4.31634	4.34852												957
																								956	3.37189	3.73621	7.69195	4.34524	3.50773	3.51048	3.37957	3.84243	5.06302	3.05746	4.215	3.7871												958
																								957	3.01173	3.24325	3.06121	4.64815	3.07092	3.14981	3.2814	6.48767	8.72775	3.18666	4.56839	4.39245												959
																								958	3.086	4.06863	7.09843	8.1009	3.22982	3.99343	3.04041	4.86233	7.90527	3.25628	3.09566	3.27617												960
																								959	3.42491	3.49581	7.44619	4.3822	3.18767	3.49647	3.36569	4.5947	8.23593	3.11543	3.46309	4.0564												961
																								960	3.08493	3.05852	3.93686	3.09002	3.58991	3.66996	3.21166	3.14189	9.99716	3.38315	3.38854	3.22831												962
																								961	4.09154	4.0392	3.5973	7.66655	3.25292	3.55392	3.13564	4.23987	8.94628	4.43918	4.47209	3.90811												963
																								962	3.80115	3.07335	3.74972	6.10185	3.45473	3.19571	3.33662	4.57139	9.94647	3.4863	3.12451	3.6647												964
																								963	3.09115	3.28396	4.03404	5.78639	3.17419	3.28497	5.05978	3.28522	11.1062	3.50146	3.75246	4.09607												965
																								964	3.26547	3.47014	9.68055	6.95396	3.29089	3.81109	3.33952	3.17135	7.62812	4.48949	3.03162	3.12519												966
																								965	3.1766	3.59808	7.01065	5.15768	3.77305	3.13833	4.22244	5.63737	7.16796	3.33365	3.41172	5.23491												967
																								966	3.83589	3.07807	4.17623	3.02971	3.07999	3.55117	3.5911	7.47526	7.59747	3.03578	3.79654	3.6659												968
																								967	4.37247	3.11196	3.70236	3.4534	6.72068	3.42865	4.15784	3.39948	7.95387	3.61974	3.60078	3.60271												969
																								968	3.63899	3.77845	3.18537	4.69799	3.24	3.3403	3.13343	6.4396	7.67932	4.13449	3.63213	3.48245												970
																								969	3.3852	3.29599	3.40437	4.05424	3.0248	3.71694	3.47709	4.11956	6.02761	4.43565	3.0322	3.48175												971
																								970	3.15627	4.62913	8.49984	5.62313	3.84845	3.0243	3.02015	7.53524	10.4309	3.33835	3.13969	4.59578												972
																								971	3.19557	3.16621	3.05543	3.20026	3.12384	3.23077	3.32037	3.52534	3.83702	4.37451	3.07932	3.09444												973
																								972	3.4021	3.07674	3.1773	3.02092	3.74547	3.41417	3.33819	3.93443	3.5913	3.37843	3.03435	5.85607												974
																								973	4.25762	3.40961	3.12575	4.16308	3.39743	3.23705	3.11685	4.15038	4.03811	3.09169	4.0656	3.27917												975
																								974	3.19518	3.87701	3.04472	4.19097	3.01542	3.87115	3.03238	3.3691	8.17696	3.13959	3.18256	5.26844												976
																								975	3.78747	3.66328	3.02384	4.51905	3.90968	3.31289	3.11581	3.05976	3.35294	3.20265	3.44099	3.34701												977
																								976	3.28479	3.06044	3.05014	7.77229	3.82041	3.99022	3.66011	3.82229	4.41154	3.61217	4.44307	4.41574												978
																								977	3.00554	3.23891	3.39163	3.29338	3.15105	4.6316	3.24117	4.62973	9.70567	3.14111	3.08593	3.87691												979
																								978	3.18123	3.03912	4.01322	3.79795	3.10283	3.19583	3.18499	5.2314	8.28392	4.33946	3.38832	3.58563												980
																								979	3.07427	3.29138	3.04305	8.58963	3.38992	3.24074	3.539	3.489	8.18232	5.58426	3.58172	4.17087												981
																								980	3.92984	3.10954	3.02772	6.88421	3.63767	3.02845	3.28047	3.4294	9.24835	6.0746	3.76222	4.97002												982
																								981	3.71221	3.14489	3.36101	4.3408	3.12523	3.54347	3.0166	6.62567	3.06037	3.47094	3.07041	3.64529												983
																								982	3.12664	3.22497	3.85308	3.15497	3.41495	4.53172	3.02964	4.45543	3.84918	3.66008	3.77408	3.62804												984
																								983	3.02332	3.34477	4.96172	3.59204	3.07778	3.79336	3.48567	3.45468	7.01095	3.13274	3.09179	3.44205												985
																								984	3.13263	3.10906	3.10678	4.67317	4.59383	3.5082	3.25423	3.9131	3.02754	3.20174	3.59621	3.04977												986
																								985	3.25688	3.06303	3.81357	3.77092	4.18957	4.87765	4.36819	3.02274	6.83384	3.15688	3.17221	3.85011												987
																								986	8.2406	4.03888	6.67588	5.77978	3.85576	3.65698	3.0665	3.661	6.93119	3.49179	3.18014	3.30708												988
																								987	6.24511	3.81034	4.24553	3.1294	3.908	3.12839	3.53828	4.28567	6.85816	3.33417	3.07987	3.49913												989
																								988	3.19178	3.16328	8.57239	9.46642	3.58663	3.20889	3.77636	3.42819	5.83028	3.53483	3.57018	4.6228												990
																								989	3.64273	5.01449	6.09466	5.71269	3.73454	3.23063	4.91506	6.0891	9.90335	4.62937	4.70866	6.45312												991
																								990	3.9355	3.26764	3.88068	5.07958	3.07014	14.2466	3.56759	5.7641	7.93618	3.28659	4.05195	3.91868												992
																								991	3.15016	3.51663	10.8515	4.03646	3.7185	3.08237	3.25117	3.05528	10.4276	3.48739	3.21844	5.93458												993
																								992	3.05425	3.80104	3.31197	6.63877	3.20581	3.25279	4.48297	3.81407	6.78184	3.1087	3.03618	3.35196												994
																								993	3.43174	4.8638	4.19845	3.0704	3.08466	3.89915	3.20292	3.79931	5.13693	3.38399	3.03985	3.81003												995
																								994	3.50177	3.67065	5.19072	4.46669	3.82616	3.05821	3.00033	3.40429	9.437	4.24025	3.38206	4.29084												996
																								995	3.57646	4.78547	3.49496	4.10624	3.25516	3.10489	3.43977	4.19725	7.52568	3.41412	4.69306	3.14434												997
																								996	6.76691	3.44291	10.5053	4.53953	3.5547	3.43897	3.55399	3.5234	8.38761	3.23923	3.05612	4.76152												998
																								997	3.72825	3.12545	4.93952	7.18023	3.58018	3.72119	5.23232	3.23359	8.05909	4.18855	3.68995	3.88173												999
																								998	3.85351	3.10473	3.55608	4.57939	3.67294	3.07627	3.0913	3.46088	3.05479	3.53563	3.91914	3.87469												1000
																								999	4.67369	3.02222	6.83911	6.16078	3.32396	4.69219	3.36818	3.4797	5.19513	3.90085	3.00676	4.59111												1001
																								1000	3.35174	4.18748	8.15438	6.16143	3.48451	3.08711	4.01695	3.27344	3.47022	4.02984	4.13402	3.67694												1002
																								1001	3.38496	3.93203	8.92698	4.72757	3.29516	3.2028	3.04222	3.60416	3.77929	3.67377	3.19036	4.53213												1003
																								1002	4.02008	3.60697	7.98223	11.5982	3.23249	3.51025	3.43158	3.75339	3.58604	3.20432	3.43485	3.00385												1004
																								1003	3.23903	3.89737	8.12736	7.57906	3.58383	3.6045	3.12405	4.95078	7.5164	5.57127	7.69029	4.96108												1005
																								1004	3.21429	3.16496	4.27736	7.91555	3.46255	3.79333	3.90096	3.38867	9.13324	5.05711	3.96873	3.92952												1006
																								1005	3.37505	3.68073	8.35443	4.25686	3.20683	3.39886	3.29352	4.36956	8.00926	3.0488	3.54889	3.03724												1007
																								1006	3.25814	5.07963	3.16226	4.04967	3.47175	3.56636	3.10603	3.52565	10.4557	3.08082	3.36527	3.44307												1008
																								1007	3.04033	3.59898	9.91872	4.0081	3.841	3.223	4.37848	4.67486	7.23819	3.77427	3.21906	4.27178												1009
																								1008	3.11652	3.29815	3.35928	3.06866	3.29375	4.76343	3.05337	3.49017	8.71969	3.57898	3.35467	3.01667												1010
																								1009	4.55653	3.38052	4.17104	3.55912	3.48914	4.98183	3.80495	3.35198	6.53932	3.7024	3.37623	4.44463												1011
																								1010	6.47663	3.43325	4.91396	3.97618	3.7	3.29031	3.12043	3.33522	10.089	3.05764	3.05434	5.06513												1012
																								1011	3.38959	3.19859	6.48007	4.11334	3.29775	3.17821	3.38841	3.13236	10.2304	4.68686	3.06468	3.27589												1013
																								1012	3.16059	4.29482	3.29246	3.40158	3.35641	3.1174	6.57331	3.08619	8.78313	3.22897	3.6878	5.65641												1014
																								1013	3.43755	5.89297	3.35543	3.17474	3.22549	3.037	3.04098	4.28629	7.37535	3.22844	3.06957	3.09383												1015
																								1014	3.16294	3.3197	9.13018	4.717	3.05227	4.99044	3.13635	3.01693	8.99883	3.87492	3.61636	5.76945												1016
																								1015	3.0317	3.01398	6.38419	4.36483	3.33762	3.28765	3.08662	3.34533	10.1595	3.61281	3.14377	7.0894												1017
																								1016	3.26969	3.17019	7.08543	3.94462	3.40013	3.10618	3.30702	3.5927	8.26196	3.60887	3.68027	3.78315												1018
																								1017	3.40328	3.12125	3.80198	6.03017	3.06593	4.36594	3.42938	3.36639	3.94636	3.13556	4.06972	4.18707												1019
																								1018	3.00711	3.74548	8.3206	3.4543	3.2419	3.35888	3.64913	3.22694	6.73165	3.22462	3.75281	5.01285												1020
																								1019	3.14344	4.32297	10.5748	4.43796	3.38692	3.60824	3.1382	3.02513	5.18281	3.10205	3.03204	6.82134												1021
																								1020	3.20519	3.31499	9.00604	3.04447	4.21827	5.05066	3.66108	3.34895	4.96132	3.46434	3.00162	8.43074												1022
																								1021	3.39881	3.09543	3.13487	4.34482	3.68212	3.25074	3.56125	3.42505	4.80219	3.57341	3.06129	3.37289												1023
																								1022	3.23737	4.49288	3.62771	5.14707	3.56063	3.85953	3.20093	3.06462	3.64988	3.34608	3.75786	4.4329												1024
																								1023	3.12952	3.51836	11.4319	5.64624	4.31404	3.08819	4.1225	5.39921	7.60168	3.72615	5.85165	4.38518												1025
																								1024	3.75473	4.94132	5.4346	3.29366	4.17096	4.00477	3.14388	3.29802	5.07412	3.20684	3.23998	3.08183												1026
																								1025	3.01897	4.59111	4.04183	3.81281	3.547	4.58848	4.22967	6.91576	3.51873	3.87425	3.70633	3.74669												1027
																								1026	3.40705	3.22566	3.63732	3.35816	3.16918	4.07267	4.30165	3.80002	8.82992	3.36204	3.30024	3.09341												1028
																								1027	3.03173	3.34356	5.35161	3.76889	3.51819	3.48914	3.23719	3.01467	7.60193	3.77246	3.29489	3.27986												1029
																								1028	3.17682	3.30158	7.9841	3.9374	4.01529	3.2402	3.3707	3.53485	7.57435	3.99719	3.75099	3.1302												1030
																								1029	4.00563	3.35752	3.96286	3.04744	3.43851	3.84252	3.12675	4.23126	6.76287	3.57718	3.08551	3.80881												1031
																								1030	3.60824	3.36483	3.44217	3.06028	3.82827	3.56568	3.5257	3.57524	8.73106	3.11947	3.20298	3.20097												1032
																								1031	3.93875	3.13859	3.88168	5.07085	3.45314	3.46468	4.81698	3.41939	3.50997	3.02018	3.56347	5.23773												1033
																								1032	3.07081	3.45433	8.40817	3.1215	4.02229	3.1526	3.56268	3.2065	5.3616	3.25566	3.36685	3.10841												1034
																								1033	3.08335	3.49295	3.86716	3.53633	3.57766	3.22349	3.41922	5.8982	9.09853	3.23295	4.66566	3.76911												1035
																								1034	3.70681	3.17411	11.1201	3.17587	3.08803	3.25402	3.21047	11.3364	7.93753	3.20404	3.21871	4.30073												1036
																								1035	3.36317	3.60612	8.05979	3.40393	3.04282	3.52822	3.00471	4.51608	8.80283	4.14911	3.57051	4.60903												1037
																								1036	4.31455	3.5914	9.13387	5.89107	4.40594	3.79436	3.92466	5.60057	3.3751	3.31876	3.13391	3.50362												1038
																								1037	8.3862	3.61665	7.99054	3.82119	3.29987	3.01319	3.2005	3.3653	3.17949	4.14414	3.02496	3.73376												1039
																								1038	3.92812	5.1269	7.49814	4.59585	3.63352	3.66954	3.16149	4.1702	3.26884	4.72299	3.24498	4.2771												1040
																								1039	3.10876	3.02202	3.53897	3.68162	3.12142	3.20296	3.02432	3.51484	3.9812	3.20217	3.08625	4.97178												1041
																								1040	4.19995	3.61583	3.23766	6.23873	3.34344	3.17687	3.17022	3.60217	3.8165	3.14127	3.25048	3.25385												1042
																								1041	3.0739	3.04482	3.47943	3.18607	4.78163	5.69328	3.57565	3.4623	3.01499	3.201	3.24696	3.30685												1043
																								1042	3.69344	3.13002	4.31413	7.20928	4.01819	3.65406	3.17662	3.19177	3.99519	3.34467	3.03117	3.2672												1044
																								1043	3.10365	3.99534	9.10884	3.22635	3.34627	3.37489	3.22928	4.3113	8.05843	3.47166	3.42254	4.35486												1045
																								1044	3.21186	3.02751	5.75456	3.72376	3.1035	3.80555	3.49495	4.53537	7.74729	3.48782	3.13561	3.5599												1046
																								1045	3.17148	3.21518	3.71233	5.313	3.66216	3.32438	3.46455	3.01582	3.00907	3.47629	3.38727	4.39193												1047
																								1046	5.02493	3.18386	5.04161	3.95074	6.70702	3.4832	3.12714	3.00135	8.62066	3.25522	3.045	4.61138												1048
																								1047	9.87491	3.15958	3.50469	5.40432	3.23948	3.23078	3.28907	3.42949	7.43576	3.1069	4.146	5.25602												1049
																								1048	3.77528	3.35207	6.12977	3.12909	3.2511	3.19613	3.81172	3.18038	10.1421	3.72852	3.66856	3.20179												1050
																								1049	3.16234	3.5008	5.80681	3.04645	3.31759	3.63959	3.91761	3.60904	8.55759	3.81812	3.29029	3.60094												1051
																								1050	3.00129	4.44065	6.87608	3.3512	3.74095	3.5053	3.61091	3.95594	6.99371	3.50461	3.18627	3.2098												1052
																								1051	3.21432	3.1114	3.38748	4.70896	3.1405	3.16319	3.09342	3.42049	4.27974	3.73743	3.59788	3.06175												1053
																								1052	4.77956	4.24885	7.8789	3.40003	4.54963	3.85556	3.23396	8.37634	7.17332	3.71366	3.79899	3.15511												1054
																								1053	4.60397	3.3293	9.9844	3.00115	3.38231	4.07625	3.46693	5.82264	10.8118	4.60514	3.75477	3.2239												1055
																								1054	7.72437	3.06682	6.08072	3.08221	3.08154	4.04394	4.18927	3.37797	9.5716	3.7228	4.81334	3.92343												1056
																								1055	3.50789	3.89776	9.26701	4.33578	3.53	3.31488	3.24386	3.18601	7.26456	3.51073	3.06359	3.70323												1057
																								1056	3.23641	3.57061	4.57831	3.47408	3.07327	3.67443	3.07517	3.43888	3.26272	3.70733	3.7602	6.07879												1058
																								1057	3.09133	3.43445	4.19403	4.09815	3.2279	3.20502	3.23413	3.37231	3.31798	3.77094	3.55606	3.95593												1059
																								1058	4.76424	3.53704	9.46846	5.51248	3.5223	3.10282	3.51945	3.41512	3.03763	3.30088	4.03421	3.39329												1060
																								1059	3.24758	3.05806	3.67592	4.1986	3.43622	5.22497	3.12597	4.78017	3.18727	3.93379	3.50624	4.65797												1061
																								1060	3.23824	3.10732	6.55416	3.20176	3.32398	4.76292	8.91978	7.75394	4.6834	3.44453	3.12593	4.14579												1062
																								1061	4.13342	3.22884	7.3117	3.22928	3.1906	4.2792	3.1564	3.30065	6.68067	3.74391	3.20636	5.57422												1063
																								1062	3.33513	3.0374	3.60391	4.16571	3.31461	3.90097	3.06268	4.4558	6.92839	3.11073	4.34741	3.61401												1064
																								1063	3.36821	3.19678	5.81268	9.33224	3.05207	4.49128	3.62799	3.88021	3.52777	3.19309	3.46668	5.20859												1065
																								1064	3.66141	3.51124	3.10704	6.64072	3.32668	3.29376	3.69921	5.87836	10.2304	3.25273	4.23579	4.72108												1066
																								1065	3.12148	4.14949	7.19876	6.99974	3.10672	3.55925	3.72962	3.03252	5.16039	3.98643	4.39891	4.86177												1067
																								1066	3.41146	3.81078	3.54232	4.58715	3.20632	4.12087	4.22974	3.12263	3.16419	4.20737	3.2137	3.25588												1068
																								1067	3.29778	3.78272	3.61194	3.07222	3.52522	3.49443	3.16797	4.4004	3.47073	3.44114	3.14352	5.60707												1069
																								1068	3.06249	3.01883	3.35387	4.52285	3.61103	4.0566	3.02072	3.14711	10.8707	3.24811	4.84164	3.47284												1070
																								1069	3.23572	3.05915	3.77983	3.24529	3.84514	4.02632	3.29273	4.64882	10.2914	3.21987	3.16577	6.97537												1071
																								1070	3.01407	3.82074	18.576	9.59088	3.28986	5.27978	3.46568	4.11946	3.08015	3.35823	3.27677	3.31737												1072
																								1071	3.77623	3.75448	8.75608	3.99226	3.02862	3.39871	3.1774	4.69864	3.05003	3.70234	3.13784	5.77935												1073
																								1072	3.03138	3.3698	9.47145	4.79845	3.43581	3.74216	3.38485	3.9024	7.69843	3.1266	3.24948	4.95859												1074
																								1073	4.13994	3.51301	10.2795	3.03271	4.29642	4.12333	3.34776	3.98553	11.6329	3.02359	3.37973	4.07538												1075
																								1074	6.15423	3.05836	7.15445	4.86224	3.24342	3.6585	3.65583	3.1901	9.30736	3.01344	3.06161	3.28451												1076
																								1075	3.64927	3.01213	7.43778	5.52498	3.80885	7.4736	3.12322	3.7631	6.95852	3.22948	3.25474	3.44698												1077
																								1076	3.16051	3.56718	7.85834	3.44993	3.6608	3.76838	3.15643	3.54749	5.53272	4.05861	3.12117	3.66007												1078
																								1077	3.80572	3.34946	5.97013	4.77144	3.34129	3.40063	3.1852	4.03113	7.52439	3.27341	4.06551	5.73875												1079
																								1078	3.07653	3.51878	3.83987	3.45479	3.01989	3.10453	3.32394	4.56364	8.26072	3.08136	3.27258	3.08252												1080
																								1079	3.27078	3.47028	7.49746	5.82689	3.31886	3.469	3.37116	4.71226	8.63868	4.68617	4.04587	3.48425												1081
																								1080	3.03365	3.44714	11.8727	9.58257	3.38275	3.21641	3.75791	3.15415	12.9223	3.89502	3.12902	4.3869												1082
																								1081	3.1264	3.13979	8.27686	6.68193	3.58275	5.68294	3.62994	3.71223	7.26922	4.20682	3.27184	3.70198												1083
																								1082	4.96216	3.53513	10.0847	6.92579	3.06102	3.3527	3.32236	3.92497	4.77261	3.71634	4.41091	3.49005												1084
																								1083	3.77476	3.31902	3.07344	3.18046	3.1436	5.02649	3.96044	3.0133	8.11984	3.23781	3.55383	3.6675												1085
																								1084	3.24741	4.56353	4.17088	4.12784	3.02653	6.70971	3.52362	3.4284	4.7271	3.31927	3.88279	3.90245												1086
																								1085	3.48979	3.92699	3.59661	4.64124	3.30141	4.82443	3.22714	4.71171	7.78089	3.36831	3.804	3.2062												1087
																								1086	3.14941	4.28279	3.04382	3.06608	3.22627	3.50832	4.1588	6.53761	3.37109	4.94823	3.35442	3.43439												1088
																								1087	3.1734	3.27172	10.6495	7.61936	3.24255	4.63938	6.58749	3.68481	4.34449	3.00932	3.26893	3.13066												1089
																								1088	3.04241	4.69291	12.2679	3.78114	3.58753	4.01616	3.2859	3.41956	3.06198	3.74062	3.06414	3.24951												1090
																								1089	4.74804	3.02072	11.9304	3.4998	3.47771	4.04526	3.07323	3.7012	5.64509	3.96227	3.02233	3.86539												1091
																								1090	3.92973	3.92338	8.75889	4.86742	3.37326	3.58198	3.03289	3.34405	8.877	3.91295	3.22576	3.60657												1092
																								1091	3.0352	4.79974	16.0355	6.96122	3.048	5.30266	4.02338	3.08645	8.0483	3.61703	3.60073	4.34338												1093
																								1092	4.26406	3.75735	17.1969	3.64313	3.30871	4.79101	3.29947	5.06444	10.0633	3.16386	3.30913	3.00628												1094
																								1093	4.02544	3.16647	5.54865	3.4494	3.18726	6.43017	3.06711	3.14941	7.63175	3.45472	3.17099	3.30328												1095
																								1094	3.48547	3.54543	4.69409	9.74821	3.11801	3.34459	3.39633	3.61352	6.90782	3.05019	3.64432	3.8516												1096
																								1095	3.45566	3.863	5.39584	3.28353	4.28009	3.58697	3.65237	5.29398	5.4873	3.13655	3.52279	3.67466												1097
																								1096	3.90738	3.01407	3.83648	3.00948	3.79094	3.00507	3.12126	4.26301	4.85933	3.00269	3.4341	3.19312												1098
																								1097	6.27646	4.49929	3.48516	6.56383	3.08191	4.00663	3.02482	3.49764	3.79309	4.61686	3.37848	3.66958												1099
																								1098	3.25762	3.61603	13.6283	4.32633	3.28052	3.19253	3.19439	3.32995	4.51299	4.08771	3.69628	4.13033												1100
																								1099	3.23986	3.10563	9.78085	3.67382	3.63029	3.53082	3.08632	3.245	10.7641	3.18248	3.13428	4.00503												1101
																								1100	3.46484	3.54948	6.1412	4.2242	3.17439	4.75568	3.6519	3.07418	5.34973	3.59334	4.55853	4.14004												1102
																								1101	3.74244	3.74625	3.68506	3.79374	3.75865	4.23471	3.08459	3.07432	7.54279	3.64551	3.76436	5.18869												1103
																								1102	3.21244	3.26827	5.57341	3.77966	3.91328	5.16577	3.00828	3.07899	9.45925	3.53307	4.57044	4.71837												1104
																								1103	3.24922	3.71757	14.7812	3.99951	3.49696	5.38456	3.6882	4.19417	7.18835	3.84522	3.67089	3.49146												1105
																								1104	3.80021	3.89691	5.49376	5.03257	3.7113	3.15282	3.75748	4.28661	5.77481	3.81409	3.02469	4.85673												1106
																								1105	3.04507	3.93552	5.10011	3.86539	4.38976	3.56155	3.20236	3.00038	9.0719	3.19485	3.12277	5.00883												1107
																								1106	3.11436	4.14382	16.3447	6.12473	3.01781	5.90259	4.0694	4.67514	5.18006	3.39668	3.52812	3.79205												1108
																								1107	3.20109	4.80107	6.71542	9.30456	3.24657	4.2432	3.06818	3.17183	10.3783	3.6304	3.38083	4.50528												1109
																								1108	3.37826	3.35626	8.0888	6.64006	3.73611	4.05	3.71963	3.80468	6.29112	4.72205	4.14949	6.00806												1110
																								1109	3.32865	3.40768	8.57755	3.37273	3.49608	4.84161	3.03377	3.41712	5.23662	3.0812	3.24106	3.28364												1111
																								1110	3.06206	3.5318	3.02993	3.94916	3.68255	3.57151	7.06734	4.26721	3.42506	3.93517	4.60389	4.45044												1112
																								1111	4.01729	3.6417	4.57695	5.13266	4.74249	3.70914	3.11119	3.49766	8.74758	3.12603	4.09655	3.86514												1113
																								1112	3.14715	3.15235	6.67809	4.04561	3.20159	5.06507	3.03016	3.70111	5.74644	5.3731	4.6895	4.55461												1114
																								1113	5.42753	3.33019	5.28208	3.51779	3.68071	4.75185	3.06069	3.46747	7.06945	3.01382	3.31099	4.10399												1115
																								1114	9.68682	3.02123	9.63807	3.80352	3.27553	4.76068	3.03757	3.33089	10.0666	3.2202	4.97156	4.92639												1116
																								1115	4.58175	3.17231	4.57277	3.13577	3.08974	4.43948	3.26137	5.22922	5.22455	3.69298	3.36723	3.59919												1117
																								1116	3.15007	3.70147	3.02212	3.44947	3.35302	5.83026	3.57552	3.28065	4.40972	3.46391	4.03173	4.4937												1118
																								1117	5.09898	3.6189	12.5058	3.51682	3.7041	4.36848	3.07797	3.33674	10.8584	3.13367	3.07141	5.45541												1119
																								1118	3.94476	3.05276	12.2895	3.60128	3.16326	3.25498	3.05481	3.86403	7.41047	3.43507	3.27314	4.7223												1120
																								1119	4.06637	3.22772	7.20496	5.33683	3.30525	4.44769	3.67236	3.50196	6.17809	3.81361	3.04982	3.93122												1121
																								1120	3.27613	3.82599	11.8099	8.56314	3.39173	4.94619	3.166	4.92246	8.00384	3.82735	3.36799	3.0218												1122
																								1121	3.0652	4.05371	9.14935	3.26388	3.4107	3.19019	3.00469	3.79458	8.11299	4.02526	3.37396	3.81834												1123
																								1122	3.37458	4.55759	3.2	3.16945	3.13367	4.15008	4.30388	4.56964	8.96972	3.18964	3.96569	3.75871												1124
																								1123	3.66124	4.29915	5.52459	5.04451	3.0912	3.57136	3.01066	4.82271	7.14681	3.19354	3.16549	3.0749												1125
																								1124	5.58873	7.37985	3.27956	5.83083	3.12468	3.42219	3.27741	3.52229	8.72242	3.28579	3.80887	3.42643												1126
																								1125	3.09556	4.85872	11.6905	6.42907	3.26648	5.2365	3.01722	3.33528	9.02299	7.61371	4.11257	3.79275												1127
																								1126	3.746	3.77319	7.06068	4.15778	4.25433	3.87613	3.18092	3.71028	9.28716	3.58317	3.17631	5.06457												1128
																								1127	3.97194	3.85321	10.191	6.0312	3.44031	4.38095	3.03378	4.13195	7.31564	3.64001	4.27008	3.18053												1129
																								1128	3.68588	3.43091	3.63901	4.04936	3.1964	3.49892	3.08116	3.93287	8.12841	3.7851	3.22681	4.467												1130
																								1129	4.51888	4.42364	6.44144	5.95974	3.32514	4.34437	3.7081	5.36301	7.22012	4.22682	4.16979	3.86742												1131
																								1130	3.02469	4.90076	3.71032	6.48788	3.29336	5.45031	3.86551	5.12171	4.38077	3.38973	3.00573	4.45045												1132
																								1131	3.48259	3.03239	6.86634	6.28516	5.25331	4.31112	3.04862	3.09982	8.45335	4.75547	3.29699	5.29938												1133
																								1132	3.56466	5.18586	3.25949	4.01577	4.27001	6.07805	3.45231	3.79878	3.09733	3.44214	3.31839	3.40183												1134
																								1133	3.54636	3.0933	13.2563	3.24229	4.3445	5.94026	3.3671	5.20801	10.3802	4.39609	3.49787	3.87059												1135
																								1134	3.43184	3.10843	5.35163	3.48182	3.24415	6.46104	3.24445	3.55296	6.73817	3.40241	3.0305	4.05221												1136
																								1135	3.61381	4.07625	6.12536	3.04774	3.15058	4.2391	3.50935	3.41109	10.5455	3.72214	5.52582	3.93857												1137
																								1136	3.04741	5.12174	3.57532	3.03877	4.55975	4.1642	3.22069	3.58408	3.40271	3.44373	3.05871	5.55903												1138
																								1137	3.58021	3.70892	6.72619	3.45823	3.58191	3.33557	3.89147	3.42869	5.89823	3.37833	3.00712	6.26073												1139
																								1138	3.93139	3.89125	3.00351	3.59299	3.57393	3.96946	3.20012	3.18892	3.09076	3.24663	4.18712	3.7412												1140
																								1139	3.49579	3.23586	3.92294	4.96729	3.67864	3.77442	3.1874	3.14623	3.23457	3.16009	3.63723	4.27075												1141
																								1140	3.82784	5.56163	3.27421	3.07963	4.01812	5.36511	3.31738	3.09809	10.0067	4.23637	3.83069	3.19827												1142
																								1141	3.24233	3.3137	5.2295	3.39721	3.68155	3.0465	3.36039	3.66442	11.9837	3.09154	3.22066	3.564												1143
																								1142	3.20314	4.9513	3.92731	4.29675	4.20227	4.13883	3.59611	3.79786	11.441	4.14769	3.11386	4.06551												1144
																								1143	3.5643	3.33795	3.64045	3.76652	3.56676	3.3368	4.34839	5.19037	7.93858	3.36008	3.58059	5.69533												1145
																								1144	3.41042	4.20817	3.29078	3.22576	3.17153	4.30559	3.19486	3.55583	7.91634	3.22806	3.02787	4.10985												1146
																								1145	3.41216	3.06526	3.2159	4.61567	3.12772	5.18713	3.60866	3.65973	7.0519	4.57597	4.31225	4.16846												1147
																								1146	3.41241	4.98353	10.6671	4.2531	3.57988	3.20924	4.00694	3.83131	6.54692	5.10319	3.26462	3.88973												1148
																								1147	3.34759	3.34544	14.915	3.6965	3.09571	4.29115	3.20746	3.59987	6.98217	3.12735	3.09935	3.17546												1149
																								1148	3.52939	4.25072	9.13911	5.59623	3.3352	3.48496	3.20673	3.18225	11.0941	3.19123	3.64184	3.59544												1150
																								1149	3.07123	3.17436	13.5646	4.88206	3.0411	3.97279	5.75939	4.31816	11.0127	5.2274	3.01907	3.55715												1151
																								1150	3.10483	3.16979	11.7893	3.50779		3.68162	4.1332	3.6081	4.93581	4.51676	3.35741	3.38457												1152
																								1151	3.48042	3.24476	16.2408	5.24006		4.41032	3.50646	3.13331	4.09322	8.01887	3.05144	4.68024												1153
																								1152	3.2201	3.25682	5.44884	4.10108		4.46619	4.41284	3.59906	3.1005	3.31738	3.21765	4.37217												1154
																								1153	3.08152	3.70148	10.923	5.22536		3.22033	4.86169	4.5119	10.2567	5.05922	3.24052	7.19399												1155
																								1154	3.17218	3.86214	7.44787	3.53205		3.57789	4.64085	3.0682	4.02096	3.6918	3.37379	6.20533												1156
																								1155	4.05192	3.82302	9.21779	5.13301		3.25501	3.57738	4.33884	6.8096	4.07813	3.11923	3.03806												1157
																								1156	7.34361	6.10318	12.0441	5.24286		3.73819	3.12025	4.35336	3.18683	3.90435	4.37142	3.14274												1158
																								1157	4.18083	3.13435	4.72229	3.16666		3.18385	3.95169	3.09779	7.22822	5.44719	3.61002	3.00649												1159
																								1158	3.26948	4.60671	8.91395	6.55948		5.4372	3.33361	3.2106	14.2157	3.71165	3.25751	3.76867												1160
																								1159	4.40123	3.79218	9.49086	3.7137		3.98182	3.02906	3.35065	8.87661	4.31343	3.20056	3.02467												1161
																								1160	3.2472	3.55005	9.03229	4.19425		3.82327	3.06627	4.96936	8.67604	3.74401	3.69125	3.57234												1162
																								1161	3.46398	3.51225	12.0981	3.17384		5.10484	3.12092	4.54404	5.78788	4.37078	4.01884	4.92307												1163
																								1162	3.72897	3.20392	5.07918	3.48734		3.47155	4.49501	4.18656	6.30958	5.00566	3.60355	3.16058												1164
																								1163	3.01222	3.21358	10.4624	5.85145		4.11958	3.62861	6.07891	4.10698	4.60642	3.09221	3.90055												1165
																								1164	3.49794	3.37246	12.6668	4.64116		4.13398	3.61433	3.94544	3.15738	3.70928	3.06607	5.44422												1166
																								1165	3.05429	3.02592	11.2573	6.96087		3.14296	3.1817	3.02888	3.57038	4.7034	3.66939	3.96513												1167
																								1166	3.51534	3.58668	8.29478	9.09378		5.18207	3.51861	3.47474	6.822	4.02593	3.69693	3.55541												1168
																								1167	3.03793	3.77821	8.44652	6.47576		3.19942	3.26209	3.56876	7.00665	3.53066	3.2933	4.39403												1169
																								1168	3.48859	3.18232	18.165	4.38586		3.24461	3.13068	3.13906	3.31428	4.04513	3.62573	3.01104												1170
																								1169	3.24798	4.24527	7.4153	3.73057		3.81944	3.0083	3.39194	6.70633	3.09341	4.06495	9.33992												1171
																								1170	3.48259	3.55952	4.18436	3.30559		6.65771	3.31407	3.30078	8.71128	3.69764	3.23681	3.26299												1172
																								1171	4.27849	3.40635	4.65995	3.83372		3.24999	3.10903	3.38197	6.93155	4.57479	4.4828	3.1209												1173
																								1172	3.29289	3.50541	3.68397	5.36201		3.50125	3.22801	4.59574	3.9761	3.21669	3.24407	3.54471												1174
																								1173	3.1435	3.26212	9.32956	4.26049		4.61215	5.03698	3.9434	3.06407	4.76042	3.72731	3.08594												1175
																								1174	3.10081	3.27192	6.28127	4.06485		3.86092	3.72932	3.46514	3.52102	5.22461	3.2201	3.37949												1176
																								1175	3.02191	4.47936	11.0192	3.6732		6.9461	3.75469	3.48416	3.14515	4.6068	3.35038	4.44257												1177
																								1176	4.55537	4.49342	14.5715	4.51112		3.95609	6.5165	3.05208	10.6667	4.54511	4.7748	3.56543												1178
																								1177	4.4587	3.68808	12.0855	3.11343		3.68905	3.17955	3.25633	9.52037	4.3869	3.13994	4.7971												1179
																								1178	3.50562	3.33211	11.2635	4.76644		3.58012	3.0839	7.87448	11.3731	3.83893	3.20601	3.22845												1180
																								1179	6.97949	3.58374	12.9875	3.74076		3.09662	3.40135	4.23847	11.2437	4.41068	3.24484	3.23413												1181
																								1180	3.06565	3.82762	8.05615	4.0867		3.21153	3.53767	3.37146	7.79889	3.82033	3.5266	6.12823												1182
																								1181	3.64251	4.87317	7.02347	6.86432		3.28721	3.32917	3.46752	3.86596	3.54992	3.55418	6.03111												1183
																								1182	3.70107	3.08645	11.4185	6.87321		3.54935	3.92256	3.20217	4.16822	4.66437	3.01437	3.44786												1184
																								1183	3.59077	3.52821	4.28064	3.85948		3.49997	3.18997	4.58929	5.77436	4.04124	3.40288	3.0988												1185
																								1184	3.00962	4.77859	5.01302	4.52267		3.07534	4.06242	4.13325	10.0756	3.01675	3.50655	3.5541												1186
																								1185	3.1238	3.74045	3.12629	4.08213		4.50225	3.89018	5.01156	4.94574	4.8296	3.0458	3.46372												1187
																								1186	3.09839	3.80343	3.8051	3.48696		4.02192	3.2695	3.79292	3.09137	4.09101	3.52386	5.03401												1188
																								1187	3.34456	3.44124	8.41976	6.22751		5.25666	3.94738	3.17316	9.43072	3.17941	3.56305	3.58541												1189
																								1188	3.18376	3.49388	10.2221	3.62246		4.74213	3.49446	3.12533	8.81145	3.35034	3.04514	4.07979												1190
																								1189	3.14311	3.21611	10.9423	3.73879		3.10493	3.20076	6.03341	9.4784	3.45815	5.01961	3.97581												1191
																								1190	3.04562	3.16338	12.6418	3.94798		5.67734	3.13464	3.72268	5.8501	3.22285	3.48001	3.67933												1192
																								1191	3.02159	3.01622	12.227	4.75301		3.93154	4.12274	3.59183	3.13021	4.47727	3.14239	4.0352												1193
																								1192	3.26664	3.52292	13.3222	3.96963		6.75521	3.18903	4.76409	5.15831	4.65175	3.15065	3.80606												1194
																								1193	3.07213	3.01876	9.47602	3.39377		3.6748	3.28912	6.51322	9.75848	3.30156	3.65433	3.69113												1195
																								1194	3.11002	3.10778	8.99974	3.18588		4.64789	3.12442	3.26968	5.04654	3.6392	3.15486	3.36571												1196
																								1195	4.07486	3.32298	10.7255	3.85562		4.12167	3.12235	4.06029	6.00125	4.1857	3.21382	7.34794												1197
																								1196	3.18832	4.33682	7.99643	3.98621		4.4124	3.17742	4.67071	6.0388	3.07178	3.04488	3.40195												1198
																								1197	3.26015	4.29311	11.281	3.0021		4.96802	4.08702	3.64201	10.0131	5.34056	3.03895	3.7273												1199
																								1198	4.35388	3.4964	6.40058	6.98931		3.88316	3.16046	3.07035	8.73495	3.54388	3.20128	3.29714												1200
																								1199	3.56398	3.58701	7.10419	6.89		3.45847	3.54836	3.97854	9.19249	5.00461	3.55844	4.67236												1201
																								1200	3.02897	3.22232	4.18187	5.50365		4.68611	3.45825	6.52361	5.9524	4.53399	3.35034	3.56967												1202
																								1201	3.4353	3.65002	3.35409	3.27005		3.59593	3.22936	4.72766	11.5545	4.47368	3.10597	3.27789												1203
																								1202	3.5077	6.57764	3.09375	5.98969		3.30837	3.71783	4.8329	9.47373	3.6382	3.24935	7.12941												1204
																								1203	3.80224	5.36391	7.76024	4.26381		5.14012	3.36389	4.6391	7.44497	4.60385	3.26872	4.25917												1205
																								1204	3.53784	3.29838	8.77298	3.32358		3.05785	4.13845	3.26336	7.60537	3.04565	5.88598	3.2347												1206
																								1205	3.94808	3.08051	9.46968	4.86499		4.84975	4.24291	3.35473	8.60798	3.02241	3.8824	3.11608												1207
																								1206	3.3957	3.04103	11.5175	5.46083		3.88293	13.0614	3.7308	7.29229	3.6401	3.69502	3.45405												1208
																								1207	3.58041	3.31665	12.6099	5.63793		3.99001	4.16393	3.27862	9.95529	4.82606	3.30499	5.36789												1209
																								1208	3.58836	3.61567	13.1339	5.16613		3.40862	3.01746	6.4393	7.44862	3.41142	4.35464	3.03831												1210
																								1209	3.12263	3.03643	11.1093	4.93951		7.05881	3.34552	3.08987	6.00297	4.00985	4.12459	4.60312												1211
																								1210	3.27809	4.26778	12.3341	3.90438		4.44395	3.12883	4.05465	3.10408	3.11261	3.27215	4.18502												1212
																								1211	5.02536	3.62861	14.735	4.5075		5.32533	8.30189	3.6752	8.75568	6.23329	4.8121	3.047												1213
																								1212	3.79733	3.50428	5.69065	3.29758		4.21664	3.54012	3.35679	9.71731	3.79779	3.31807	3.55425												1214
																								1213	3.2718	3.42881	7.29405	3.90998		4.61619	3.72008	5.64289	5.4843	4.75884	4.12982	4.01904												1215
																								1214	3.23605	3.41522	4.91485	3.36982		3.48294	3.31747	3.4263	7.0469	3.14975	3.17457	3.40492												1216
																								1215	3.14299	3.22566	7.8442	3.0448		3.35347	4.82313	4.3165	3.31941	5.65731	3.94088	4.36695												1217
																								1216	4.19086	3.26562	10.062	3.2415		3.91905	3.7847	4.09749	4.26981	3.62894	3.06839	3.38398												1218
																								1217	3.75183	4.34573	4.95249	3.66653		4.88348	4.99978	3.68271	3.11775	3.9689	3.3926	3.83976												1219
																								1218	3.38836	3.19601	11.3273	3.08793		3.89958	3.0107	3.31808	3.87077	3.8339	3.2082	3.22194												1220
																								1219	3.09486	3.90726	8.72846	3.41153		4.04094	3.99596	4.01149	3.51602	4.29545	3.91549	4.54375												1221
																								1220	3.81083	3.57933	9.25676	6.00219		6.51395	3.24409	4.89812	9.07532	4.9781	5.38853	6.27729												1222
																								1221	3.39648	3.66552	9.96266	4.10576		8.13298	5.23078	3.9387	7.80268	3.82195	3.4847	3.89678												1223
																								1222	3.32825	3.27301	4.26	7.2001		4.94977	3.59162	3.63922	10.9404	6.51831	3.18272	3.87968												1224
																								1223	3.07751	3.57682	14.4202	6.33622		3.94777	3.03334	3.38651	8.85329	6.07008	3.11633	3.40333												1225
																								1224	3.02189	3.90026	11.1561	3.00217		3.37967	3.17424	3.76703	3.438	3.78173	3.94491	4.48995												1226
																								1225	3.37757	3.02866	15.2746	4.25825		3.76065	5.52226	4.25216	12.6665	6.12085	3.03143	4.44086												1227
																								1226	3.22222	3.32122	3.27392	3.14368		4.25622	5.50764	3.37787	8.90982	4.79265	3.2486	4.70607												1228
																								1227	3.48053	3.5722	3.3465	7.01052		5.02368	4.09202	3.56753	5.49901	3.84887	3.18538	4.47389												1229
																								1228	3.20899	3.03858	3.99628	6.36919		4.28956	3.44972	3.32015	5.18993	3.44622	8.87444	4.24535												1230
																								1229	3.25259	3.44211	3.85623	3.67649		3.49866	3.16455	6.05135	6.02734	3.34361	3.05201	3.44158												1231
																								1230	3.24303	3.75376	7.68494	4.34176		5.73362	3.68383	3.13829	7.78493	4.13497	4.36548	3.06048												1232
																								1231	3.1392	3.52416	6.8198	5.63771		3.33602	3.62693	4.56648	5.6246	4.54088	3.0541	3.26579												1233
																								1232	3.10849	4.4642	7.39493	8.04127		4.43414	4.09344	3.15815	9.77235	3.18692	3.14758	5.3811												1234
																								1233	9.1083	3.27552	8.43255	10.7565		4.98629	3.65037	3.13217	11.8359	4.82472	3.10974	3.6123												1235
																								1234	3.57357	3.55793	8.70846	9.10389		4.84359	3.74945	3.25916	3.06006	4.37708	3.06291	4.60937												1236
																								1235	3.58315	5.83157	14.5259	3.9058		4.08685	3.503	4.10514	9.16715	4.77904	3.0761	3.59401												1237
																								1236	3.00087	3.16037	13.1003	3.79287		3.93561	3.93288	3.56115	6.25538	3.74972	3.69806	3.27698												1238
																								1237	3.56175	3.60146	10.7323	4.71431		4.13064	3.00968	3.64327	6.07022	3.23293	4.43851	3.10714												1239
																								1238	3.8337	4.09091	8.29963	4.43039		3.34005	3.45672	3.45621	8.4804	4.64341	3.50348	3.11824												1240
																								1239	3.78638	3.80816	6.20098	3.39946		3.64408	8.88322	3.4308	8.54051	3.29242	3.02161	4.48689												1241
																								1240	3.20182	3.38048	3.08366	3.88529		5.63169	5.04363	3.00273	4.31377	3.33564	3.60577	3.60763												1242
																								1241	3.62586	4.30102	10.7118	3.01777		3.88871	5.32996	3.13898	9.49923	5.68391	3.15212	3.43889												1243
																								1242	4.45247	3.4386	12.4948	4.61218		4.66133	3.85335	3.50725	9.73941	4.96155	3.21939	4.19826												1244
																								1243	3.40758	3.2019	12.3185	3.7112		3.63208	3.24506	3.573	6.59367	3.85204	3.10247	3.26998												1245
																								1244	3.08239	3.61669	10.5894	3.05191		3.25413	3.50155	6.64693	5.1443	3.0321	3.5593	3.11732												1246
																								1245	3.44596	4.54002	4.6073	3.73164		3.62439	3.5818	3.8329	3.26444	3.50424	3.08489	4.11447												1247
																								1246	3.27916	3.6575	12.805	3.14101		3.5287	3.00376	3.33349	7.92732	3.75782	3.13499	4.47031												1248
																								1247	3.54864	3.68548	13.0471	3.50529		6.68661	3.22384	3.03331	7.81304	5.53642	3.52593	4.24798												1249
																								1248	5.00873	3.24817	9.79717	3.11977		3.28938	7.56563	3.71994	3.19167	3.33446	3.80024	3.22724												1250
																								1249	3.29225	3.07338	8.50731	4.85751		3.15057	3.58656	4.53092	6.11061	3.90755	3.20009	3.56298												1251
																								1250	4.00184	3.29751	10.9645	4.20134		3.79441	3.47496	3.43962	3.4073	3.1738	3.36369	3.87461												1252
																								1251	3.31195	3.09361	4.15912	3.66613		6.60982	11.1047	3.40317	7.72085	3.59131	3.63924	3.69313												1253
																								1252	3.96948	3.74953	5.50332	3.82434		3.68185	3.213	3.73626	6.08499	3.11193	3.10781	4.74043												1254
																								1253	4.30595	4.13359	3.68051	3.8332		3.98365	3.07506	3.00424	11.5014	3.00848	3.1222	4.20545												1255
																								1254	3.05176	3.20764	3.18379	3.24319		3.34211	3.05055	3.32737	7.82077	4.65481	3.00683	3.15267												1256
																								1255	3.15499	3.5936	4.16236	5.58084		3.4782	3.25094	3.76501	3.23861	4.2203	3.89769	3.43883												1257
																								1256	4.06717	3.10266	5.12398	5.89737		3.5078	3.61738	8.12454	10.7843	4.13576	3.24479	4.75227												1258
																								1257	3.10686	3.22938	5.39693	3.22289		3.81956	3.06682	3.00938	6.86634	4.87784	11.3748	4.05891												1259
																								1258	3.23436	4.2145	6.80223	7.62507		4.4344	3.11921	3.14305	10.514	5.67772	10.7703	4.73776												1260
																								1259	3.26723	3.70534	13.5399	3.70733		3.57998	3.21384	3.87663	7.88854	3.97534	6.83963	3.29781												1261
																								1260	3.69802	4.9505	7.12758	3.03211		3.63637	4.5858	5.71978	9.34738	5.76002	3.70034	3.16895												1262
																								1261	3.52435	3.18181	17.9779	3.23386		5.43912	3.46421	3.13238	7.61263	3.11639	4.45884	3.14022												1263
																								1262	3.84657	3.42645	7.75263	4.03693		6.48867	3.09749	3.68457	9.11314	3.7989	19.8825	3.80579												1264
																								1263	3.07878	3.10329	12.8206	5.2548		3.39348	4.50976	3.96192	12.395	3.67929	3.4133	3.31644												1265
																								1264	3.87272	3.13272	16.3425	6.46847		6.86151	4.57078	3.12683	8.57661	4.7214	3.61461	9.90508												1266
																								1265	3.30469	4.09621	9.3895	4.88857		3.16012	3.46864	3.62017	9.9033	3.12439	3.2707	4.4069												1267
																								1266	3.07021	4.90239	9.52213	3.52359		4.76516	4.54768	3.78044	8.63343	4.70998	4.17813	3.18933												1268
																								1267	3.37206	3.75824	5.66556	4.65876		4.00831	5.3856	3.04938	4.67141	3.24959	4.00013	3.57477												1269
																								1268	3.34228	3.80904	8.07979	5.81734		5.63264	3.27632	4.43369	10.6829	4.0395	3.18494	3.11814												1270
																								1269	3.78141	3.1107	6.96128	3.66		5.93077	7.09204	3.72652	3.84882	3.58465	3.05183	3.12867												1271
																								1270	4.08473	3.18382	5.89051	3.28223		3.97688	3.01339	3.06221	10.9302	3.69432	3.15432	4.43927												1272
																								1271	3.09228	4.36152	4.66139	3.38822		3.49676	3.40367	4.65312	10.7311	4.46818	3.10344	3.02833												1273
																								1272	3.41416	3.75749	7.26561	3.48094		3.74363	4.58793	3.02012	7.57224	3.01846	3.3312	3.14651												1274
																								1273	3.13339	3.6824	12.7111	5.52849		3.40827	3.68077	4.69834	6.50044	3.23632	3.63216	4.09914												1275
																								1274	3.99231	3.13592	3.38857	6.59938		5.50998	3.20549	4.26607	3.20885	5.28413	3.5704	3.03417												1276
																								1275	3.17632	3.75517	11.0775	3.02086		3.26075	4.40286	3.13489	6.4874	3.91599	3.92468	3.21467												1277
																								1276	3.18263	3.10567	7.8454	5.11771		6.97803	3.87479	4.19257	7.43452	3.93967	4.75965	5.58542												1278
																								1277	4.19039	3.48892	4.19545	4.23359		3.02779	3.26697	4.01279	6.6475	4.03276	3.04246	3.41837												1279
																								1278	3.08004	3.42769	5.90158	3.85267		3.5975	3.44533	4.31551	3.21903	4.55537	3.53391	4.05519												1280
																								1279	3.17518	3.84439	5.75947	4.04861		4.01728	11.6359	6.49185	10.0444	3.73863	3.77383	3.31934												1281
																								1280	3.40502	5.8394	4.46353	9.57051		3.75423	3.23781	3.5621	5.97158	3.56062	4.13846	3.56524												1282
																								1281	3.33796	3.60384	9.85093	6.60129		3.03931	6.95832	3.54564	9.26635	3.48299	3.09406	4.0564												1283
																								1282	3.62772	3.05457	3.98578	8.0923		4.48021	3.62661	3.31663	3.02885	4.2732	3.67455	3.04437												1284
																								1283	4.4871	3.03833	12.6374	4.05451		4.89356	5.22383	6.05804	3.51636	3.09674	3.27188	3.33436												1285
																								1284	4.83443	7.09109	13.7919	3.46329		3.97328	3.01387	3.96737	3.68938	3.80759	3.38823	4.06281												1286
																								1285	3.26801	3.34539	12.534	3.37189		3.19057	3.11035	3.65826	10.6276	3.60355	3.22524	3.01609												1287
																								1286	5.61217	3.68346	3.49879	5.5647		3.65843	11.5522	3.27972	8.12652	3.09162	3.1995	5.33669												1288
																								1287	3.9023	4.17193	6.82973	5.3435		4.55165	4.38174	4.99782	8.84869	3.17899	3.25996	4.93092												1289
																								1288	3.60126	3.05135	3.22835	5.80361		4.12224	3.30981	3.64923	5.56889	4.72165	3.23494	4.88133												1290
																								1289	3.17068	3.16197	4.32	3.00567		3.09647	12.8065	3.6811	8.97071	3.94082	3.8855	3.13107												1291
																								1290	3.20525	3.34621	3.99283	3.53382		4.74662	3.64787	4.08444	7.71893	3.37015	3.67653	4.59095												1292
																								1291	3.20361	3.29479	4.14884	4.39835		4.68105	3.26416	4.01591	4.09808	3.32736	3.0299	3.7455												1293
																								1292	3.0577	3.24165	3.12143	3.18636		3.67861	6.77371	5.43705	3.09193	4.38694	3.10409	5.68485												1294
																								1293	3.463	3.04028	11.6472	6.05146		3.50303	3.20212	3.31058	10.3396	4.29857	3.7427	3.33862												1295
																								1294	3.16902	3.81222	12.8505	6.96014		3.42447	3.08983	4.55869	4.76556	3.59154	3.02848	4.09737												1296
																								1295	3.90052	3.34159	10.6828	3.5122		5.43959	3.35077	3.91747	9.28599	4.59729	3.23829	6.6738												1297
																								1296	3.25683	3.16377	9.23804	3.26176		3.82006	3.02178	5.04226	5.88732	4.03092	5.25985	3.32833												1298
																								1297	3.09519	3.35341	10.4463	4.28062		4.63921	3.38685	3.33162	7.35939	5.09169	3.12865	6.27294												1299
																								1298	3.56304	4.33718	8.25364	3.9342		8.55362	3.0206	3.23237	7.28348	3.81026	3.22825	3.82527												1300
																								1299	3.44777	3.18651	6.7761	4.30879		6.34558	3.06066	3.09146	8.84099	4.3961	3.59517	3.74677												1301
																								1300	3.78645	3.61092	11.3698	7.27551		3.56971	3.54686	4.05717	4.57058	3.31816	3.56911	4.46344												1302
																								1301	4.66373	3.35916	5.03263	8.29395		4.80371	3.15049	4.93353	3.61884	3.5132	3.4481	3.35271												1303
																								1302	3.02748	3.76154	13.6409	4.80809		4.18457	3.16132	4.04354	3.98773	4.27821	3.3316	3.22644												1304
																								1303	3.27032	3.29203	9.57913	4.51997		5.14396	3.7456	4.40694	9.90983	4.36503	3.09441	3.01157												1305
																								1304	3.4087	3.00283	11.2198	4.50281		3.41358	3.09009	5.40245	7.90729	3.45371	3.56068	3.79848												1306
																								1305	7.50247	4.29179	13.9334	5.33935		3.85348	3.33516	3.92416	10.2725	4.74107	3.82741	3.00866												1307
																								1306	3.42181	3.2182	3.18435	3.51463		4.76155	3.30598	5.53921	11.8504	3.48565	3.71609	5.72033												1308
																								1307	3.03501	3.34798	3.07543	3.20101		3.72834	3.40315	5.11491	3.47927	3.26304	3.77255	4.57653												1309
																								1308	5.30141	3.90087	4.09453	6.55021		3.68123	3.93101	4.61837	4.99498	5.72594	3.55583	3.25886												1310
																								1309	3.55289	3.68156	13.0086	5.81206		3.88462	7.20035	3.9564	7.88181	4.24692	4.28026	3.07712												1311
																								1310	3.75701	3.59556	10.317	6.15846		3.01328	3.0867	3.20987	10.4054	3.79091	3.96965	4.2647												1312
																								1311	3.08995	3.05945	15.7503	6.6446		4.07407	3.27895	3.25478	7.95798	3.46577	17.9789	6.42299												1313
																								1312	3.25115	4.45555	6.88413	5.1217		4.38958	3.05549	3.29221	8.83321	3.34495	3.23734	3.29427												1314
																								1313	3.2044	3.08634	12.5022	3.47548		5.74978	3.69044	4.91182	9.8543	4.08016	4.59391	3.67462												1315
																								1314	3.16786	4.1069	10.1996	4.3715		4.43304	3.13964	3.05343	3.62903	4.53723	3.66353	3.76772												1316
																								1315	4.03106	4.57608	12.3404	3.37031		5.13691	3.92222	3.40973	7.23815	3.25285	5.03214	3.26709												1317
																								1316	3.74097	3.05125	9.19885	3.30124		3.90112	3.1245	4.14624	6.12733	3.72487	3.19505	6.34242												1318
																								1317	3.0755	3.63939	9.86494	4.01901		3.52147	3.77499	3.47645	8.21698	3.0774	3.06293	5.82346												1319
																								1318	3.06153	3.35587	11.6112	3.10407		3.02666	5.53569	4.00104	6.16982	4.44866	3.77292	3.99079												1320
																								1319	3.51823	3.02318	12.6662	3.06748		4.53244	3.52786	3.13567	5.37838	4.03446	3.15645	8.20089												1321
																								1320	3.12298	5.42476	3.15517	3.87302		3.63913	3.16069	3.36894	4.26753	3.44462	4.4142	3.61594												1322
																								1321	3.42297	3.17266	3.20598	4.61658		3.4432	11.468	4.17588	7.08583	3.57261	3.22047	4.18861												1323
																								1322	3.92159	3.10647	4.64193	4.38099		3.20782	3.38835	3.28706	8.73338	4.71936	3.98724	4.01775												1324
																								1323	3.08934	5.72839	4.30365	5.15483		3.35194	3.57294	3.54311	10.4638	3.07959	4.02019	3.00537												1325
																								1324	3.00798	3.01067	6.30475	3.91998		3.31227	3.46794	3.36426	8.06919	3.20853	3.07889	4.07959												1326
																								1325	3.07516	5.60171	4.08694	4.30033		3.05466	3.52655	3.14611	7.14956	4.77749	4.01124	4.20319												1327
																								1326	3.02228	3.17167	3.25469	4.22716		3.75408	5.73214	4.6892	7.35495	4.47651	3.74585	4.64669												1328
																								1327	3.36905	3.63548	5.20415	3.74542		3.32965	3.45663	5.00536	9.76627	3.50636	3.00792	4.71423												1329
																								1328	3.41701	3.37031	6.9056	7.25857		3.10536	4.5561	4.12801	4.65692	4.35568	3.54163	3.3979												1330
																								1329	3.08476	4.16108	8.57467	3.65943		3.03958	3.1807	3.28127	4.03182	3.15457	4.00424	3.51307												1331
																								1330	3.59218	3.15013	14.2983	3.77787		3.64444	3.21817	3.10489	3.56839	4.09912	4.79295	4.37721												1332
																								1331	3.36254	3.26235	10.9619	3.21736		3.34874	8.39418	3.06611	12.8215	3.6931	3.35742	3.83065												1333
																								1332	3.63267	3.77849	10.8832	3.67707		3.73405	3.02647	3.29	12.67	3.18929	3.10955	3.00759												1334
																								1333	4.51478	3.81202	4.95335	3.43137		3.00288	9.62254	4.47762	3.06351	5.25226	3.31491	3.12985												1335
																								1334	8.76619	3.43365	3.7296	3.95059		3.30247	4.7784	4.96245	3.67963	4.33834	3.16079	3.22837												1336
																								1335	3.02868	4.34848	5.63432	3.60961		3.58334	6.34408	3.21897	3.90217	3.11303	3.524	3.21958												1337
																								1336	3.18132	3.05668	6.35044	5.04737		4.10168	3.174	3.60736	3.86029	4.37988	3.27564	3.11504												1338
																								1337	3.46986	3.51753	3.91493	3.51245		3.76456	7.44663	5.32912	3.66059	3.04917	3.07341	3.24316												1339
																								1338	3.12845	3.32496	4.25892	6.92442		3.00419	7.9803	4.18408	6.82353	5.94462	3.41658	3.49666												1340
																								1339	3.22975	3.28863	11.7073	4.59824		4.29131	5.02633	3.40102	7.45095	4.39231	3.3334	3.24294												1341
																								1340	3.19703	3.17118	4.26613	5.51581		3.3662	3.16701	4.22504	8.90963	3.21081	3.04693	3.02217												1342
																								1341	4.36953	3.99278	3.84573	3.17862		3.31609	3.15007	3.23871	8.42931	4.60612	3.13034	3.19484												1343
																								1342	3.33549	5.35732	17.124	5.79221		3.97433	3.74336	4.27307	8.41742	4.67343	3.24497	4.37656												1344
																								1343	3.06657	3.15137	3.67614	5.38064		4.06764	3.36485	4.28106	8.48027	3.22706	3.32522	3.17607												1345
																								1344	3.23087	4.41395	4.36538	3.7901		3.04928	3.32205	3.1065	4.08659	3.13259	3.39197	3.0811												1346
																								1345	3.47444	4.20491	3.66143	4.25405		3.30036	3.23345	3.98467	3.40439	5.04961	3.27021	3.00099												1347
																								1346	3.14765	3.82508	11.7275	3.94658		3.21064	3.79473	3.60906	3.11194	4.6489	3.12522	3.15114												1348
																								1347	3.20834	3.74324	7.60695	3.18398		3.54964	3.0256	4.39043	3.67751	3.10879	3.92193	3.83236												1349
																								1348	3.06861	3.77571	7.2283	6.65617		3.30538	3.90641	3.72619	11.624	3.09704	3.55894	6.17527												1350
																								1349	3.15679	3.48278	14.6036	4.78434		3.26169	3.05742	5.01878	9.29869	5.05727	3.41302	3.82445												1351
																								1350	3.13494	3.56578	11.743	4.29839		3.71068	4.942	3.33414	9.57022	3.67576	3.04487	3.06798												1352
																								1351	3.06315	3.68872	12.85	6.92185		4.0761	4.09708	3.31577	3.18238	4.62248	3.15999	3.33773												1353
																								1352	3.04222	3.14192	7.95052	3.74265		4.01121	3.64716	3.50653	10.9998	3.46098	3.40386	4.03614												1354
																								1353	5.09015	4.81057	16.138	3.67561		3.17544	4.211	3.13795	9.48887	3.47246	3.56363	3.67635												1355
																								1354	3.75646	3.11581	8.46969	3.07768		4.49356	3.25366	3.25721	11.4765	3.02131	3.14098	3.2661												1356
																								1355	3.24694	3.10957	7.54545	4.24677		3.66863	3.02291	3.89546	5.19792	4.56117	4.08236	3.41264												1357
																								1356	3.86269	3.42646	7.90169	5.04221		4.89018	3.03808	3.98878	4.94991	3.66328	3.2343	3.18163												1358
																								1357	3.85708	4.00305	8.9313	6.41413		3.21307	3.35879	5.73061	7.43124	4.01675	3.06609	6.75896												1359
																								1358	3.91474	3.11828	6.74125	3.17629		3.84993	4.8751	4.5803	8.30497	3.27556	3.15105	3.22692												1360
																								1359	3.27947	3.02963	4.18018	3.44726		3.62465	10.0365	5.80311	8.11376	3.00651	3.25569	3.36891												1361
																								1360	4.90414	3.83227	8.54829	5.27024		3.19053	3.21332	4.19037	8.631	3.17148	3.26862	5.69908												1362
																								1361	3.02912	3.22334	3.42743	3.95248		3.7937	7.19984	3.03191	4.16878	4.00148	4.01678	3.3873												1363
																								1362	3.01036	3.11974	10.2728	3.36316		3.28035	3.56913	3.84974	7.71887	4.22863	3.64392	3.33385												1364
																								1363	4.24269	3.56286	9.98033	3.44522		3.80712	3.32196	7.22091	3.87936	3.66637	3.40962	3.0827												1365
																								1364	4.06186	4.35218	10.3158	3.49593		3.71043	3.24965	4.16824	6.93374	3.11707	3.26279	6.17094												1366
																								1365	3.20476	3.47416	12.179	3.79279		4.2517	3.40972	3.47009	7.3456	3.92	3.70253	4.52851												1367
																								1366	3.28623	3.14943	11.6767	5.50811		3.28737	3.403	3.75605	10.3662	3.62775	3.51574	4.43738												1368
																								1367	3.34909	3.26132	14.5842	3.75567		3.49894	7.83356	3.51536	9.95688	4.04786	3.00813	4.21689												1369
																								1368	3.54591	3.30797	12.4583	3.81558		3.87134	3.6157	3.0925	8.65573	5.55376	4.27729	3.5277												1370
																								1369	3.4434	3.0944	3.44561	4.14091		4.56055	3.96788	7.95241	12.5444	4.97749	10.3532	3.65538												1371
																								1370	3.04708	3.69182	3.16166	5.12887		3.82816	3.72223	5.09422	9.75476	4.05056	3.0572	3.72853												1372
																								1371	3.4115	4.44375	3.92301	5.93737		3.4232	3.00327	3.59462	10.7148	4.83845	3.96489	3.8193												1373
																								1372	4.75486	3.02163	3.85405	3.9782		4.69901	3.02586	4.15567	9.17853	3.90027	3.20691	3.00101												1374
																								1373	3.06837	3.04932	3.95452	3.81007		3.32684	7.58759	3.09635	8.98436	4.06165	3.20777	3.88886												1375
																								1374	3.30159	3.17073	10.8949	3.41892		3.35848	3.6903	3.02807	7.63388	5.29696	3.98544	3.3469												1376
																								1375	3.06726	3.34069	11.5036	4.30987		3.20437	3.22954	3.58561	3.47765	3.16666	3.07666	7.64782												1377
																								1376	3.23777	3.15348	10.9982	3.24137		5.27217	12.556	3.07443	9.62343	3.31472	3.17082	7.43019												1378
																								1377	3.06193	3.0477	6.36252	3.87795		3.57378	3.52292	3.16464	7.97127	4.39444	3.06733	3.09375												1379
																								1378	3.02633	3.69426	3.30752	3.86779		4.38938	3.27683	3.10583	7.85478	4.8836	5.30114	8.86609												1380
																								1379	3.06271	4.31262	3.00063	5.13829		3.88573	4.37551	5.12557	4.60542	6.80548	3.82551	4.67431												1381
																								1380	3.78405	3.0446	15.1383	3.45799		4.59985	8.003	3.05084	9.10811	3.31784	5.30748	4.26603												1382
																								1381	3.10834	3.24612	14.8407	11.5349		3.8212	4.35616	3.39937	9.04566	5.45083	3.85507	6.3041												1383
																								1382	3.94938	3.18699	3.43776	5.25201		3.16378	3.13912	3.68656	8.70699	4.16347	5.84732	4.00007												1384
																								1383	3.28945	3.30018	3.19285	4.8473		3.37736	3.71618	4.47182	8.73695	3.33023	4.16026	12.2868												1385
																								1384	5.34057	3.36316	3.26668	3.73459		3.93889	7.76117	3.01517	3.1205	3.08555	4.32036	4.78779												1386
																								1385	3.40496	4.08215	12.2828	6.46334		3.04301	8.87989	3.67115	9.85088	4.36361	3.19715	4.56303												1387
																								1386	3.09749	4.30613	4.24041	5.18039		3.98392	10.2595	3.48265	6.9207	3.11686	3.43726	7.10356												1388
																								1387	3.96713	3.49717	6.18611	3.37537		3.08773	3.12725	3.47081	4.93375	3.33491	4.2505	3.829												1389
																								1388	3.69885	3.40965	11.0001	4.76973		3.95468	3.05486	9.53429	5.01311	5.72115	3.22788	3.04667												1390
																								1389	4.42544	3.10244	10.1885	9.25987		3.22829	4.11113	3.27644	3.30694	4.10981	3.84301	3.02697												1391
																								1390	4.54679	3.11241	11.9263	3.27054		3.40185	5.85453	7.07894	5.3757	3.4806	3.01488	3.08792												1392
																								1391	3.41796	3.49007	10.3625	5.72273		3.38133	3.06697	6.38552	11.1421	3.50357	3.45686	4.52101												1393
																								1392	3.05741	3.73052	10.5019	4.19695		3.19699	3.6586	3.73612	4.14908	4.57996	3.27979	3.24454												1394
																								1393	3.10796	4.21266	11.1401	3.65242		3.11937	4.43668	4.19189	9.25479	3.16554	3.19385	7.52856												1395
																								1394	4.05621	4.45433	10.6373	3.07552		3.1937	3.97599	3.46521	5.62676	4.92725	3.26067	6.09684												1396
																								1395	3.08492	3.35161	5.49597	4.28241		3.25982	5.03887	3.23022	7.55411	3.07234	3.1703	5.2506												1397
																								1396	3.03908	3.04889	3.54174	4.22814		4.16271	7.51641	4.86335	4.37191	6.8114	3.82437	5.52443												1398
																								1397	3.73073	3.40864	4.95142	3.67963		3.44095	3.09299	4.57452	4.84171	6.5615	3.32277	4.25816												1399
																								1398	3.24263	3.9884	9.77946	5.17863		3.46532	3.9299	4.09488	3.45763	4.04468	3.07252	3.61816												1400
																								1399	3.32674	3.02169	8.13792	6.74685		3.64574	11.5063	3.91723	6.65844	4.55047	4.56781	3.06683												1401
																								1400	3.30226	3.65047	3.45674	3.24687		3.71349	4.02181	3.85805	3.3041	4.86525	4.84624	5.38408												1402
																								1401	4.65321	3.96462	4.30816	8.3654		3.48006	3.2508	3.93651	3.54177	5.69821	4.36106	4.36138												1403
																								1402	3.02067	3.00287	11.471	7.28315		3.71347	3.0593	4.10086	4.00626	3.11798	3.17523	3.06895												1404
																								1403	4.77671	3.25522	8.55664	8.33713		4.26633	5.06943	3.27903	3.17718	5.01107	3.34195	4.4477												1405
																								1404	3.21049	3.73841	7.93104	5.2358		3.20302	3.2044	3.73542	3.99729	3.94209	3.65427	3.78366												1406
																								1405	4.02497	3.62888	9.01128	3.53191		3.61546	10.5562	7.646	3.14167	3.40768	3.45791	3.53816												1407
																								1406	3.08517	3.17422	3.42536	5.3498		3.58477	3.00481	6.02422	5.2921	4.92833	3.20736	3.96658												1408
																								1407	4.11404	4.61277	4.8844	3.53427		3.64368	3.02167	3.08542	3.4179	3.23374	3.70716	4.88616												1409
																								1408	3.14177	3.61857	8.78519	4.30236		3.10728	4.26708	3.26428	3.53449	3.55578	4.95057	3.9764												1410
																								1409	3.48596	3.49317	6.48616	3.23485		4.13737	3.34127	3.00333	13.0108	3.51759	3.28157	3.2999												1411
																								1410	3.26775	3.81819	3.65403	4.42581		3.23497	3.9565	3.32208	8.99027	3.38301	3.14939	3.06444												1412
																								1411	3.00655	3.16497	3.62589	3.60861		4.04859	3.42063	4.06766	3.72022	3.14785	3.1382	3.87412												1413
																								1412	3.12303	4.08922	4.19954	3.06383		3.0224	3.18986	3.28005	6.97291	3.94545	4.60599	7.88407												1414
																								1413	4.72363	3.53969	3.00744	3.12812		3.05131	3.23999	4.91954	11.3175	3.33325	3.38202	4.3677												1415
																								1414	3.68608	3.48556	3.80834	4.01931		3.80427	3.00222	3.96031	9.82491	4.72519	3.67692	5.02743												1416
																								1415	3.31617	3.58739	4.9762	6.49494		4.5406	3.01978	4.36706	3.59938	3.51179	3.51243	4.27502												1417
																								1416	3.22716	3.0912	3.35968	3.44505		3.52651	3.09691	3.50578	5.58374	3.12792	3.86966	3.54674												1418
																								1417	3.17924	3.16011	9.73009	5.14416		3.43272	3.34258	3.22065	8.74916	3.15422	3.05005	3.42236												1419
																								1418	3.11256	3.00169	10.1695	7.96376		3.19558	3.27304	3.05324	7.99739	3.01224	3.33764	3.05042												1420
																								1419	4.73013	3.96439	7.49346	5.07435		5.1108	8.03128	4.45837	9.3648	4.45639	3.23996	3.4231												1421
																								1420	3.6371	4.32988	8.19456	3.59889		3.87434	12.6472	3.54393	3.28462	3.93355	4.67696	5.53144												1422
																								1421	3.0219	4.08645	10.5725	6.13635		3.17625	3.04091	3.72367	4.0899	3.46502	4.71751	5.86234												1423
																								1422	3.15496	3.96053	10.686	5.78553		3.40226	3.18871	4.72539	3.58991	6.76672	3.98592	3.34196												1424
																								1423	3.38206	3.46183	14.9493	5.51947		3.7615	3.71107	3.09861	3.3198	3.52532	3.03415	5.15756												1425
																								1424	3.61037	3.14073	9.26665	6.18665		3.24127	4.2742	3.0149	7.26979	3.57611	3.0229	4.14898												1426
																								1425	4.13924	3.24237	3.2921	9.07233		3.90781	3.55484	4.04551	7.485	4.25765	3.51262	3.60176												1427
																								1426	3.22242	3.88908	4.07502	4.15246		3.97833	3.29638	4.59141	3.46453	3.25035	3.0443	3.39479												1428
																								1427	3.39911	3.90041	5.83316	4.56274		3.03363	3.09322	3.23332	6.97612	3.12654	3.37669	4.74054												1429
																								1428	3.09309	3.37291	6.39961	3.60116		5.38344	3.16032	6.62968	6.66761	4.00604	3.45282	5.58602												1430
																								1429	4.2927	3.09828	4.50729	5.15243		3.77754	12.3419	3.73261	6.82327	5.21363	3.17649	6.66048												1431
																								1430	3.07608	3.11279	7.37823	5.97121		3.72461	7.72638	4.05341	7.96353	3.56331	3.69171	3.13036												1432
																								1431	3.14474	3.31919	3.71485	4.36088		4.61879	3.58161	4.09721	5.92634	3.35539	4.50975	3.57189												1433
																								1432	3.17343	4.52006	12.7283	5.77561		4.73202	3.41187	3.75622	4.32349	3.73311	3.1434	4.40172												1434
																								1433	3.35354	3.48965	7.59084	5.20074		3.602	3.03139	4.49777	8.89472	5.03318	3.77378	6.73576												1435
																								1434	3.39306	3.21359	9.86211	3.60743		3.62067	4.31124	5.40519	6.53725	5.04726	3.16139	7.67413												1436
																								1435	3.03325	3.41938	3.27892	7.82327		3.05285	3.68219	3.17872	3.02361	4.46656	3.74313	3.40576												1437
																								1436	3.28097	3.06305	11.9477	6.10276		3.6003	3.9323	4.77693	7.03884	4.32253	3.43168	3.30393												1438
																								1437	3.02055	3.86549	10.6515	4.80082		3.0161	4.43618	3.09295	3.41619	3.16939	3.74241	3.84546												1439
																								1438	3.52491	3.35129	11.3856	7.77243		5.93027	3.27668	4.35756	8.23311	3.83448	3.70412	3.44679												1440
																								1439	3.62274	3.39649	11.1675	4.05401		3.33847	3.16028	4.44447	8.92547	5.49562	3.50976	3.4726												1441
																								1440	3.14337	3.06068	8.01142	4.64662		4.46692	3.7223	3.83809	7.08925	6.37852	3.46372	4.80978												1442
																								1441	3.49254	3.37123	3.20678	3.70855		4.81651	4.35292	3.43655	7.55009	3.01461	3.05873	3.86439												1443
																								1442	3.15618	3.58585	12.0987	3.82805		3.7137	3.05484	5.61891	8.79837	3.61267	3.12202	5.45181												1444
																								1443	3.27166	3.0129	12.7517	3.26722		3.93192	3.27661	3.496	8.66047	4.32182	3.24839	5.25539												1445
																								1444	5.30076	5.40678	10.0198	5.42624		4.27111	3.28779	4.90656	10.3924	4.67325	3.64272	3.9948												1446
																								1445	3.55559	3.72881	12.5034	4.34006		3.50789	3.08379	3.74528	9.8137	4.10081	3.09428	3.35649												1447
																								1446	3.3642	3.22855	5.6712	5.62226		3.98884	7.01303	3.76259	7.85885	5.29452	3.78412	4.55886												1448
																								1447	3.82778	3.51928	7.89425	4.11754		4.39246	8.62328	3.21206	5.21072	5.19627	4.12891	3.16941												1449
																								1448	3.52224	3.15438	5.70101	3.44344		3.2837	8.10529	3.1672	9.98643	3.47889	3.64861	3.93201												1450
																								1449	3.47924	4.0719	3.73363	4.30929		3.48509	3.70059	3.19057	11.3961	3.30207	3.24106	3.84519												1451
																								1450	3.39372	3.56131	7.77745	8.73475		4.99495	3.46948	4.43282	11.0925	3.34594	4.85281	4.97371												1452
																								1451	3.09181	3.27001	11.2221	5.92587		4.35081	3.55269	3.82421	6.49965	3.44708	3.23265	3.01277												1453
																								1452	3.16159	3.00898	4.80415	5.09159		3.18688	3.64057	4.7056	10.1401	5.14442	3.37763	8.02143												1454
																								1453	4.37034	3.64401	3.14541	3.29179		3.14436	6.65099	3.24075	8.5573	3.04243	3.32095	3.02476												1455
																								1454	3.41039	3.27101	3.76268	3.4083		5.36351	4.51259	5.54556	11.1832	5.06056	3.24244	4.20799												1456
																								1455	3.35322	9.55312	4.29965	7.67999		4.53435	3.16932	4.90344	3.4894	5.28962	3.69267	5.1093												1457
																								1456	3.11825	3.31973	3.98534	4.69601		5.29433	3.10148	5.37201	6.84736	5.65748	3.00198	3.55035												1458
																								1457	3.39307	3.42281	4.77429	5.16619		3.92036	3.4947	3.20572	11.0861	3.02639	3.55877	5.13313												1459
																								1458	3.16599	4.8056	5.84147	9.39768		3.68352	6.49656	3.83451	9.1478	4.24412	3.02017	3.20796												1460
																								1459	3.23792	3.01628	3.02171	4.99782		3.14392	9.69578	3.68368	7.25986	3.68207	4.05687	3.07734												1461
																								1460	4.19838	3.30538	4.60581	4.34108		4.22989	3.11808	4.40644	6.83304	3.20263	4.67093	3.30953												1462
																								1461	3.01588	3.27099	11.5096	5.80799		3.46472		3.37357	7.84599	4.45173	3.19482	3.4507												1463
																								1462	3.11428	4.83845	9.47505	4.89188		4.09243		5.69717	7.86878	3.82347	3.30504	5.39767												1464
																								1463	3.33764	3.13076	9.26451	3.36755		3.45393		3.04324	6.01674	3.02905	3.25934	3.20908												1465
																								1464	3.16541	3.07517	10.1782	3.81979		6.09077		3.0411	8.05791	4.99054	3.6046	4.28286												1466
																								1465	3.37045	5.00578	15.3681	3.45459		4.87712		3.46859	6.51926	4.72455	3.14887	3.40374												1467
																								1466	3.28281	3.3146	7.12535	4.94516		3.09263		3.20853	10.7606	3.88637	3.61987	3.14415												1468
																								1467	3.09884	3.03653	8.92791	7.12735		3.73774		3.26267	6.0609	3.16655	3.34831	3.01894												1469
																								1468	3.96865	4.13783	8.28562	6.22929		3.54374		3.72052	5.40372	4.79363	3.42495	3.55765												1470
																								1469	3.29596	3.19187	8.66316	6.17239		6.3021		3.47978	3.47759	3.31622	3.36693	3.73732												1471
																								1470	6.0163	3.51619	11.974	4.15047		3.96942		3.20364	6.94797	4.69954	4.42624	3.5357												1472
																								1471	4.85944	3.23525	10.5592	3.06273		3.47089		4.73603	10.3455	3.08034	3.11614	3.77376												1473
																								1472	3.49438	3.61974	10.5689	5.30613		3.73528		3.56018	3.69564	3.87233	3.05353	3.79245												1474
																								1473	3.48096	4.00572	3.61152	5.55225		3.57771		7.77063	4.02443	3.12191	3.10322	4.95622												1475
																								1474	3.33008	4.10675	12.1542	3.54561		3.74629		3.19124	3.67191	6.06612	3.29018	5.55313												1476
																								1475	3.1848	3.27165	11.6353	4.4298		4.11998		3.02245	5.47706	3.78163	3.63423	3.15754												1477
																								1476	3.23739	3.00151	10.0899	4.58463		3.23596		3.0423	8.69214	3.0235	4.47663	3.00078												1478
																								1477	3.95243	3.3242	9.38006	4.6905		3.36243		4.54506	7.91913	5.73364	3.19594	3.10453												1479
																								1478	3.24855	5.36482	8.11731	6.19675		3.87777		3.18007	8.12334	3.62819	3.00331	3.98683												1480
																								1479	3.02208	3.47696	8.04978	4.97614		3.28393		3.60576	6.29452	3.25606	3.37251	3.12745												1481
																								1480	3.54185	3.18125	12.488	4.17513		4.9629		4.29267	9.93886	4.45681	3.03236	3.87135												1482
																								1481	3.91322	3.41156	14.0367	3.87893		3.14187		5.53538	9.96919	4.24787	3.09485	3.57411												1483
																								1482	3.93363	3.05081	4.14694	3.75546		6.3637		3.99492	10.4435	3.43493	3.18184	4.00239												1484
																								1483	3.00385	3.08808	4.88905	3.15944		3.71172		3.02083	7.60227	4.16606	3.25818	3.68985												1485
																								1484	3.64299	3.83847	13.7555	4.05769		4.42857		3.35195	5.7687	3.88871	3.04773	3.78325												1486
																								1485	3.02901	3.58786	13.1968	3.49242		3.89986		4.23597	7.75617	3.29238	3.16317	5.56065												1487
																								1486	3.98383	3.14603	8.26058	3.70904		6.11644		3.78326	11.1662	4.66988	3.29223	3.05777												1488
																								1487	3.451	3.82041	3.92589	3.39046		4.28768		3.07229	8.5128	3.91174	3.93667	8.03173												1489
																								1488	4.04723	3.15463	14.9675	3.09542		4.6972		3.21321	7.47508	3.68294	3.89689	3.26625												1490
																								1489	3.16454	3.51972	10.944	3.48601		4.75065		4.0623	4.66404	3.14555	3.06293	3.28679												1491
																								1490	4.73399	3.86334	10.1709	4.33406		3.02361		3.15557	3.85417	3.66592	4.5394	5.05536												1492
																								1491	3.3634	3.03316	6.46934	9.77513		3.57473		3.07681	6.31963	3.55305	3.08661	3.19418												1493
																								1492	3.45186	4.45577	3.5503	3.94025		3.15279		5.87131	7.6405	5.57421	4.08824	3.54693												1494
																								1493	3.19083	4.08715	3.46056	3.07839		3.76577		4.46661	7.17146	4.11826	3.16683	4.44692												1495
																								1494	3.00294	3.167	4.38867	4.10499		4.93982		4.26386	6.045	3.64556	8.16596	8.00266												1496
																								1495	3.04628	3.95312	6.70125	3.49384		3.87143		3.1329	5.32454	3.09836	4.24063	4.35167												1497
																								1496	3.56524	3.79499	3.32968	4.74546		4.30763		5.2874	3.47065	4.12381	3.1021	4.82039												1498
																								1497	3.80417	3.30261	3.0111	3.06079		3.19791		3.52668	3.62827	5.05314	3.34956	9.81213												1499
																								1498	3.06305	3.58236	10.1395	4.0856		3.61168		3.39975	3.32364	5.32498	3.11451	5.69569												1500
																								1499	3.91602	4.54381	12.0859	3.42967		6.77003		3.31133	3.08361	3.0892	5.38017	3.6041												1501
																								1500	3.64457	4.11932	14.3408	3.23527		3.32127		3.59193	3.09619	3.03773	3.30901	3.11127												1502
																								1501	3.12153	5.80933	10.5302	11.3177		3.38014		3.22481	3.38215	6.10749	3.10738	3.64653												1503
																								1502	4.57348	3.8258	3.3422	4.60431		4.92855		3.53914	3.87137	3.92527	3.3906	3.27875												1504
																								1503	3.12602	3.93592	4.19461	4.05328		4.52796		3.67221	3.00032	3.95501	4.92344	3.11986												1505
																								1504	3.69524	3.10523	7.48355	3.4995		3.62992		5.00091	5.05782	3.38204	3.21338	3.55628												1506
																								1505	3.63051	3.68802	11.289	3.88231		3.21396		5.67814	4.19515	3.23489	3.23895	3.73368												1507
																								1506	3.67565	4.6125	13.4408	3.20873		3.7921		4.89217	7.6639	3.32932	3.00689	3.47449												1508
																								1507	3.87492	3.89559	11.804	3.02857		5.4998		3.1069	9.3424	4.53763	3.05245	3.40934												1509
																								1508	3.7338	3.02803	9.48745	5.46907		3.29496		4.75985	9.50146	4.81924	3.07241	3.09901												1510
																								1509	3.57904	3.13788	3.70586	5.06757		3.04197		3.9325	7.79008	4.54713	4.45712	3.00076												1511
																								1510	3.37935	3.12376	3.16879	8.90576		3.06858		3.48695	8.37455	3.02131	3.78145	3.19005												1512
																								1511	3.63236	3.18643	3.16029	5.92181		3.34891		3.01477	7.80573	5.40485	3.39113	3.46077												1513
																								1512	3.00304	6.27775	7.77	8.72554		3.104		3.60423	8.04083	3.44084	3.17538	3.33936												1514
																								1513	3.3388	3.78583	11.3632	4.93576		3.7271		3.14858	7.15688	3.17183	3.75341	4.28118												1515
																								1514	3.58072	3.60846	15.2478	5.37563		3.69041		4.92327	7.1306	3.99353	3.24148	3.92423												1516
																								1515	4.16593	3.61769	13.4127	3.68618		3.35063		3.62557	3.45267	3.91068	3.14708	6.0775												1517
																								1516	3.0024	3.0715	15.528	3.84622		4.27995		4.35166	7.27039	3.99545	3.88428	7.01752												1518
																								1517	3.3845	3.41964	10.3087	3.85731		4.38068		3.75628	5.65937	3.87963	3.27686	4.06959												1519
																								1518	3.24128	4.03539	10.7605	3.07749		3.91312		4.00327	4.06735	3.36663	3.1061	3.67546												1520
																								1519	3.49169	3.16352	10.0935	3.40865		3.06326		7.45266	8.97657	3.17116	4.06778	3.00403												1521
																								1520	3.33323	3.00714	3.19892	4.73047		3.28708		3.36221	4.19565	5.73346	3.21122	4.34323												1522
																								1521	3.94903	3.07304	3.67072	5.1251		3.22544		3.05834	4.8158	4.22093	4.29738	4.09279												1523
																								1522	3.68746	3.07013	3.15046	5.46796		4.62166		4.42959	6.15489	4.0524	3.39806	3.20703												1524
																								1523	3.45707	4.62024	3.49426	5.74621		3.63266		3.04031	3.99348	4.96009	4.84634	4.7145												1525
																								1524	3.15826	3.49983	9.14319	4.75266		3.09995		3.43173	6.27128	5.26383	3.37307	3.60795												1526
																								1525	4.3143	4.10314	15.0939	3.69568		4.16521		3.1934	11.4257	4.13361	3.80497	5.11774												1527
																								1526	3.36388	3.71053	5.45207	3.69145		3.3551		7.22161	7.93991	5.47627	3.77761	3.07329												1528
																								1527	3.22141	3.07602	5.64989	4.58986		3.34212		3.05538	10.5442	3.03481	3.84505	3.1204												1529
																								1528	3.31338	4.89616	12.0228	4.51568		3.17182		4.15886	5.41297	3.55524	3.44806	3.27716												1530
																								1529	3.20719	3.24969	4.56447	3.66265		3.34829		4.05713	6.1489	3.92491	3.7608	3.99076												1531
																								1530	3.17944	3.19216	8.79881	3.70113		3.61187		3.28217	8.15285	3.56187	3.68267	3.64734												1532
																								1531	4.22424	3.42341	12.1069	4.90197		3.02338		4.27583	9.00134	3.726	3.12898	3.13191												1533
																								1532	3.36967	3.85467	9.2547	3.13862		3.72945		3.41845	4.36186	4.36483	3.89083	7.23989												1534
																								1533	3.17113	4.48462	4.93884	3.84681		4.64912		5.69132	8.3672	3.85838	4.82842	5.21014												1535
																								1534	3.37484	3.81551	3.1496	3.52364		3.75951		5.69782	6.21122	3.00972	4.18679	4.5126												1536
																								1535	9.27374	3.21146	12.3667	3.3021		3.33439		4.90459	6.42952	3.53579	4.32113	3.46084												1537
																								1536	3.30129	3.21658	11.563	4.465		4.7057		4.03107	4.13162	3.66287	3.09762	4.86092												1538
																								1537	3.27461	4.26126	11.1487	5.39711		3.14088		3.41252	7.68919	3.33597	3.36134	6.84108												1539
																								1538		3.02091	7.31159	7.09265		3.3825		4.55319	6.77801	3.82777	4.10665	4.19691												1540
																								1539		3.06537	4.32311	4.88611		3.39335		4.25605	8.90589	3.36327	3.85353	3.2808												1541
																								1540		3.36107	13.7728	8.16697		3.21254		3.19372	9.5129	4.67052	3.64508	5.39397												1542
																								1541		3.45046	5.23855	4.77239		3.73891		4.77165	3.10892	3.92457	3.02036	3.41678												1543
																								1542		3.22004	13.5626	5.93309		3.14422		3.09805	4.62572	4.77618	3.53155	3.42786												1544
																								1543		4.59082	3.71424	5.42332		3.93977		3.23685	5.17219	3.89684	3.33152	4.03256												1545
																								1544		3.27505	12.7582	4.93719		3.45841		3.50407	5.06194	3.29177	3.71857	3.38596												1546
																								1545		4.30743	11.7204	8.43353		3.35772		4.38661	6.36059	3.49546	3.06986	3.21165												1547
																								1546		3.18272	7.85749	4.08824		3.07166		3.74818	9.55149	3.97177	4.8315	7.95048												1548
																								1547		5.09643	10.4531	4.9212		3.15902		3.23596	9.39326	3.83913	3.16055	3.51												1549
																								1548		4.63982	10.9979	4.3954		3.29831		3.70091	6.51624	4.92422	3.61488	3.72374												1550
																								1549		3.26078	12.7592	5.40807		3.25177		3.16474	3.03179	4.38254	3.6062	3.734												1551
																								1550		3.21517	10.6235	4.47935		3.41844		4.26316	5.10661	4.41642	3.48106	3.76629												1552
																								1551		3.16601	6.31971	4.21024		3.59497		3.84212	9.91891	4.82862	3.40265	3.04565												1553
																								1552		3.20483	11.3846	6.51588		4.25131		4.9238	8.52026	5.35991	3.17516	4.89818												1554
																								1553		3.3704	12.2207	3.51894		3.26652		4.42467	7.92152	3.02667	3.25622	4.69941												1555
																								1554		3.16193	10.9974	3.20352		3.40561		4.94765	6.80512	3.19381	4.20599	4.88416												1556
																								1555		3.6051	12.868	8.01393		3.06602		3.03363	9.16341	3.42274	6.13773	4.35478												1557
																								1556		3.18224	13.4064	3.66303		3.56202		3.87445	6.45952	3.10393	4.19642	3.06328												1558
																								1557		3.22206	3.68412	3.48218		3.16083		4.31979	8.00367	3.89516	3.00102	4.22515												1559
																								1558		3.04628	11.5888	4.5931		3.41187		4.31113	5.98721	3.91939	3.53904	3.47225												1560
																								1559		3.77046	9.94598	5.45361		3.5664		4.4328	3.01314	3.61882	3.2504	3.18497												1561
																								1560		3.08097	7.63085	3.43212		3.52833		3.95488	4.66514	3.32286	3.25268	3.13249												1562
																								1561		3.17434	6.05535	5.63922		3.96059		3.09122	4.21196	3.0904	3.06182	3.45955												1563
																								1562		3.14153	3.28763	3.69902		3.86864		3.17176	10.794	3.65746	3.216	3.16469												1564
																								1563		4.7575	3.37739	3.11762		4.02139		3.19403	11.9734	3.36839	3.75464	3.90898												1565
																								1564		3.8863	3.4961	4.5122		5.31832		5.17379	3.56591	5.1674	3.04354	3.27002												1566
																								1565		3.11638	3.64039	4.2445		3.45627		4.65089	10.1866	3.59132	3.6522	5.16581												1567
																								1566		3.65657	4.07973	4.57712		3.50192		3.33137	13.069	3.07367	3.23482	3.13525												1568
																								1567		3.18317	9.34981	4.62706		3.46314		5.78059	7.22946	3.35508	3.75269	3.23834												1569
																								1568		3.16408	13.3721	3.46849		4.08238		4.25293	5.14751	6.24876	3.195	3.32558												1570
																								1569		3.22904	10.6042	3.08119		3.01317		3.32858	4.10261	3.89649	6.14976	3.26984												1571
																								1570		3.26026	9.16311	3.01371		3.64329		3.66321	6.88849	4.28799	3.32707	3.38787												1572
																								1571		3.03453	6.68396	4.04464		4.17004		3.41073	6.02005	4.57263	3.18604	3.37347												1573
																								1572		3.76036	6.45127	3.13381		3.69201		3.09611	7.53111	4.81996	3.9228	8.15899												1574
																								1573		3.44616	9.93112	4.75241		3.39264		3.61715	8.3861	4.15769	4.33754	4.39022												1575
																								1574		4.03606	7.7563	3.99333		3.09559		3.6174	8.6943	4.25076	3.05931	3.66379												1576
																								1575		3.03558	4.85287	4.03107		3.99654		4.01123	7.94564	6.00398	3.8272	3.38057												1577
																								1576		3.34009	13.8708	4.52682		3.33445		3.07276	6.57843	3.68134	3.23853	4.52343												1578
																								1577		3.02135	4.49687	5.88192		3.27057		3.16904	5.05773	3.59851	3.01318	3.85801												1579
																								1578		3.75656	5.10748	3.21251		3.59321		3.56039	8.20762	3.24977	3.08952	6.1867												1580
																								1579		3.64516	3.39645	3.85298		3.45163		4.954	6.13273	4.00884	3.6677	3.9172												1581
																								1580		3.77653	5.9317	8.65324		3.54298		4.50728	5.35406	3.64292	3.67291	3.92902												1582
																								1581		3.1331	5.34433	6.1411		6.16663		4.28897	4.72973	3.34233	3.21965	3.45774												1583
																								1582		3.59379	3.57701	3.09462		3.30603		3.71369	7.76976	3.16865	3.01389	3.10252												1584
																								1583		4.50855	6.41904	3.17689		3.18592		3.79869	7.2496	6.98153	4.15513	3.8085												1585
																								1584		4.25762	5.75881	4.00063		4.25819		3.27719	9.3945	3.34341	3.2001	4.48793												1586
																								1585		3.19518	15.5003	5.56477		3.28106		3.76563	9.10011	3.22522	3.01171	5.67414												1587
																								1586		3.78747	11.0062	3.46468		3.37592		3.60971	3.41271	4.06118		3.99284												1588
																								1587		3.28479	10.0211	3.44753		5.80427		4.28504	8.94766	4.54499		4.77201												1589
																								1588		3.00554	8.31637	3.21502		5.91312		4.66868	8.90931	3.12571		4.8452												1590
																								1589		3.18123	10.9108	6.49005		3.53839		3.46827	6.93309	3.6744		6.28428												1591
																								1590		3.07427	13.3432	3.71562		4.53182		7.09531	5.3389	5.38955		4.36508												1592
																								1591		3.92984	5.22542	6.0269		3.20422		3.06388	8.13267	3.00591		3.04738												1593
																								1592		3.71221	8.4599	6.94156		3.23753		5.51982	3.43589	3.57987		3.13217												1594
																								1593		3.12664	9.06779	4.94129		4.67954		3.46594	8.41161	3.63666		4.13489												1595
																								1594		3.02332	4.06961	3.64285		3.82287		3.31636	6.29013	3.50617		3.04467												1596
																								1595		3.13263	4.21843	4.12896		5.73896		3.4534	5.98283	4.42607		5.21644												1597
																								1596		3.25688	5.05967	7.58091		4.23295		4.16522	4.73651	6.17093		4.29211												1598
																								1597		8.2406	3.33884	9.55566		3.24419		3.08267	3.1901	3.5078		3.19886												1599
																								1598		6.24511	3.40929	3.11545		3.42766		5.84415	9.72451	5.77304		3.92365												1600
																								1599		3.19178	3.22316	3.23764		4.09663		6.93409	7.53859	4.01242		6.66372												1601
																								1600		3.64273	3.74442	4.86882		3.27529		3.75866	8.88481	3.6199		4.51368												1602
																								1601		3.9355	12.8954	4.67398		3.0938		4.06328	6.75026	4.23805		4.48444												1603
																								1602		3.15016	9.50025	3.21394		3.22256		3.08897	9.21615	3.0504		3.21422												1604
																								1603		3.05425	11.0263	6.03522		3.154		3.09884	4.39541	3.74698		3.3201												1605
																								1604		3.43174	8.98815	4.56736		3.24062		3.18551	6.33982	3.34821		4.84036												1606
																								1605		3.50177	5.61371	4.28629		3.20276		3.03575	6.06175	4.17921		3.33905												1607
																								1606		3.57646	4.77235	11.0404		5.25106		3.24569	3.01897	3.8977		5.3646												1608
																								1607		6.76691	4.9334	3.91186		3.12054		4.58923	6.21597	3.53324		4.70719												1609
																								1608		3.72825	6.15263	4.37859		3.2431		3.22036	9.53754	4.88598		5.60886												1610
																								1609		3.85351	3.73817	6.16214		3.55827		3.5647	6.24057	5.30911		7.70247												1611
																								1610		4.67369	3.2918	4.11144		3.03208		3.03139	8.46287	4.97538		4.65403												1612
																								1611		3.35174	4.69197	6.92665		3.13369		3.73024	8.10294	4.99067		3.1737												1613
																								1612		3.38496	5.06087	3.81127		3.4948		3.44813	3.0896	3.74167		3.73192												1614
																								1613		4.02008	14.5536	4.15659		4.39148		3.40087	3.04164	4.20293		5.76877												1615
																								1614		3.23903	14.7975	3.12787		3.44558		3.19466	9.88099	3.04425		3.04959												1616
																								1615		3.21429	10.2119	3.42787		3.37986		4.12618	6.43564	3.6963		3.10594												1617
																								1616		3.37505	7.09308	8.26799		3.67737		3.5981	9.82376	3.82673		4.43946												1618
																								1617		3.25814	8.52872	5.13746		3.0654		3.53269	5.44873	4.0074		3.08582												1619
																								1618		3.04033	11.7317	5.83335		3.36767		3.12506	8.22164	3.32514		3.45969												1620
																								1619		3.11652	14.614	5.57972		4.13481		3.18953	8.18774	3.1021		3.12314												1621
																								1620		4.55653	12.3571	5.46464		3.57447		4.95546	4.45218	4.94331		3.7538												1622
																								1621		6.47663	10.9978	4.13226		3.89357		6.09267	9.7141	3.90853		3.00987												1623
																								1622		3.38959	3.60321	5.49115		3.31015		5.32016	3.59569	3.44323		3.07516												1624
																								1623		3.16059	13.1467	3.37435		3.07384		4.39518	3.45909	3.09655		3.73613												1625
																								1624		3.43755	11.3045	4.2861		4.40365		3.27013	5.26174	3.4361		4.4282												1626
																								1625		3.16294	16.8347	4.16655		3.90461		4.24941	4.99396	5.18423		3.28087												1627
																								1626		3.0317	3.84122	4.46646		5.07185		8.70848	10.4316	5.69205		5.43475												1628
																								1627		3.26969	12.1672	3.24133		3.28666		3.47914	10.299	3.17245		5.45216												1629
																								1628		3.40328	9.78869	6.15719		3.49868		8.38177	6.8624	3.75192		4.26425												1630
																								1629		3.00711	10.1592	3.82802		3.66173		4.86293	8.27367	3.66526		5.47602												1631
																								1630		3.14344	8.59747	5.41342		5.28628		5.93875	11.3172	3.8777		6.01473												1632
																								1631		3.20519	15.1178	5.16833		3.1333		5.36654	9.88849	4.54745		4.92577												1633
																								1632		3.39881	13.2773	5.79464		3.0564		7.3729	6.57335	5.00497		4.0992												1634
																								1633		3.23737	8.63067	5.84463		3.65613		4.16496	8.11141	4.74368		3.17665												1635
																								1634		3.12952	8.16083	4.18155		3.40747		3.57836	3.31842	4.83348		3.70866												1636
																								1635		3.75473	6.48347	9.62959		3.14978		3.29201	9.90557	5.28759		3.26169												1637
																								1636		3.01897	13.8272	5.68558		4.68736		3.41277	7.12625	3.37559		6.66263												1638
																								1637		3.40705	10.4524	5.47113		3.47389		4.92209	10.158	4.04638		4.13767												1639
																								1638		3.03173	14.5563	3.08555		4.22633		7.19214	6.45839	4.00205		4.88629												1640
																								1639		3.17682	3.11224	5.41902		3.4802		3.56613	5.38842	3.43867		6.58474												1641
																								1640		4.00563	4.31426	3.98668		4.48811		4.13826	8.93752	3.01118		3.71692												1642
																								1641		3.60824	10.0275	7.00405		3.93278		3.60549	10.3441	4.44922		5.59228												1643
																								1642		3.93875	6.85051	5.2616		3.26553		3.2617	3.73893	3.84064		3.44667												1644
																								1643		3.07081	5.61223	7.89701		4.90433		6.5911	3.57691	3.21053		4.16928												1645
																								1644		3.08335	4.60746	4.86728		3.10499		3.31437	10.0128	3.90559		3.26409												1646
																								1645		3.70681	4.93166	4.14764		3.23686		3.62427	9.00811	4.07475		6.27313												1647
																								1646		3.36317	9.85604	5.66372		3.76867		3.68357	9.41241	4.04246		3.76064												1648
																								1647		4.31455	9.29916	3.41837		3.72783		3.29036	8.40867	3.40459		7.06584												1649
																								1648		8.3862	3.10622	5.496		3.09567		3.43846	7.48319	4.53915		4.74807												1650
																								1649		3.92812	3.33659	3.75377		3.4595		3.80807	8.68618	4.5971		9.07545												1651
																								1650		3.10876	3.67705	4.90522		6.49646		5.39115	6.16072	5.3514		11.3489												1652
																								1651		4.19995	11.0454	4.15891		3.62885		3.66003	5.85529	3.98203		4.19746												1653
																								1652		3.0739	12.3458	10.2409		3.51951		4.16165	8.63467	3.71074		3.00259												1654
																								1653		3.69344	11.9269	10.0626		3.05266		5.39073	8.53529	3.74419		3.46181												1655
																								1654		3.10365	13.8789	3.17911		5.19114		4.02265	8.03583	3.50373		6.63315												1656
																								1655		3.21186	10.7286	3.49013		3.32278		3.02212	9.68296	4.58768		5.42309												1657
																								1656		3.17148	15.1583	3.98772		3.0082		3.28109	3.7646	4.93102		3.87523												1658
																								1657		5.02493	7.38956	5.25638		3.28741		3.51842	7.95853	6.41735		3.13661												1659
																								1658		9.87491	9.7995	3.18141		3.1696		4.54558	6.31913	5.23502		3.53677												1660
																								1659		3.77528	4.51547	3.43755		3.41677		3.07795	7.37055	4.56055		4.30204												1661
																								1660		3.16234	13.0203	7.76514		3.04053		3.0583	4.80484	3.6397		3.81824												1662
																								1661		3.00129	12.554	3.6228		3.64246		3.36981	3.64296	3.94949		3.02053												1663
																								1662		3.21432	8.55364	3.16545		3.02855		3.45536	8.61843	3.47359		3.06957												1664
																								1663		4.77956	3.60949	3.82543		3.1725		3.23027	8.42353	3.3509		3.40143												1665
																								1664		4.60397	3.49677	3.28798		3.05664		3.09107	8.84711	3.86178		3.51267												1666
																								1665		7.72437	10.9299	3.05732		4.22958		3.04491	5.89064	3.40179		3.2565												1667
																								1666		3.50789	10.0389	6.67492		3.61838		3.44939	4.62139	4.00403		3.4524												1668
																								1667		3.23641	4.92616	3.30251		3.44478		3.77419	10.9784	4.24509		3.23329												1669
																								1668		3.09133	3.00128	3.37871		3.22018		4.40367	7.323	6.77701		6.18016												1670
																								1669		4.76424	7.3329	6.38331		4.16581		3.39019	7.1737	3.05608		3.96018												1671
																								1670		4.13342	13.7693	3.10933		3.25634		4.90017	6.14215	3.67115		3.45												1672
																								1671		3.33513	15.3775	3.17629		3.36216		3.34103	3.37855	4.98912		3.6925												1673
																								1672		3.36821	7.82361	3.11638		3.23462		3.00997	3.2178	5.35102		3.73787												1674
																								1673		3.66141	9.36474	4.03139		3.20381		7.84275	3.59457	3.41011		4.54359												1675
																								1674		3.12148	5.67721	3.23696		3.03507		3.96371	3.9925	3.5881		3.94442												1676
																								1675		3.41146	7.96094	3.81561		3.12726		3.12651	7.37088	3.67382		3.02689												1677
																								1676		3.29778	6.34621	3.49745		4.59627		3.26201	4.56561	3.5285		6.18501												1678
																								1677		3.06249	8.95393	4.1411		3.74963		3.2415	3.06585	3.71257		6.5335												1679
																								1678		3.23572	3.28076	3.41262		3.31215		5.27795	3.30629	5.44516		3.41863												1680
																								1679		3.01407	3.5335	7.7771		3.10135		4.5913	3.56515	3.73833		5.04177												1681
																								1680		3.77623	3.39055	3.43842		3.19793		3.61027	7.25278	4.9375		3.73876												1682
																								1681		3.03138	10.855	3.5902		3.62911		3.87508	6.46358	3.80288		3.09264												1683
																								1682		4.13994	10.9639	8.0527		3.52489		6.04181	8.92842	3.36921		3.08679												1684
																								1683		6.15423	14.272	4.93521		3.78287		3.85163	4.13342	4.94117		4.14705												1685
																								1684		3.64927	17.7669	4.9825		3.28711		3.48171	8.8209	4.68334		3.06732												1686
																								1685		3.16051	11.0126	3.88979		3.04762		4.14918	6.6034	3.24946		3.19434												1687
																								1686		3.80572	8.95913	4.89524		3.2788		3.81658	6.38393	3.33267		3.73496												1688
																								1687		3.07653	3.50642	5.45435		3.80822		4.26638	5.8928	5.90261		3.23901												1689
																								1688		3.27078	5.20107	3.14599		3.99185		3.0396	8.95977	3.84323		3.37621												1690
																								1689		3.03365	6.41487	4.51806		4.03368		3.01437	10.0665	5.62855		3.57434												1691
																								1690		3.1264	10.1389	5.20732		3.31832		3.25094	7.75194	5.46474		4.20608												1692
																								1691		4.96216	12.7945	6.70746		3.49868		3.12343	9.12156	3.47735		3.54507												1693
																								1692		3.77476	14.3063	5.70261		4.15741		4.23543	7.13376	3.19177		3.31345												1694
																								1693		3.24741	9.49273	3.38604		3.80849		3.73717	4.97272	3.99011		3.06684												1695
																								1694		3.48979	4.18048	5.4896		4.00351		3.49857	7.2428	3.79176		3.06275												1696
																								1695		3.14941	7.90294	4.56596		3.01027		3.43391	3.00028	3.64859		5.42314												1697
																								1696		3.1734	10.8376	5.93926		7.94979		3.52922	3.07754	5.7816		3.47308												1698
																								1697		3.04241	9.51203	7.27024		4.24672		3.49649	6.71095	3.33889		4.36464												1699
																								1698		4.74804	10.0512	5.45715		3.29053		5.3361	6.44656	4.47461		3.72465												1700
																								1699		3.92973	4.00497	4.40471		4.78706		3.40742	6.71265	5.23753		4.47993												1701
																								1700		3.0352	3.00989	5.8306		3.6014		4.17275	8.25491	3.28684		4.44777												1702
																								1701		4.26406	6.12365	3.1622		3.41956		3.10619	7.69407	5.70814		3.35347												1703
																								1702		4.02544	3.43999	3.028		3.95932		3.1072	7.92492	3.72047		3.20056												1704
																								1703		3.48547	4.01096	4.70071		4.75003		3.28236	3.31171	3.02253		3.453												1705
																								1704		3.45566	11.3162	5.65158		4.44266		3.15699	3.64475	4.35978		3.03741												1706
																								1705		3.90738	4.12481	4.14308		3.86682		4.89899	4.60554	4.85123		5.89244												1707
																								1706		6.27646	3.02513	3.15245		3.60043		4.44025	5.31969	4.24303		4.64218												1708
																								1707		3.25762	4.43571	5.12032		3.5497		4.10798	7.60526	3.80351		3.15524												1709
																								1708		3.23986	5.32551	4.1273		3.7669		3.11056	7.57407	4.77294		3.92925												1710
																								1709		3.46484	5.5988	3.39129		3.20208		4.68091	9.54815	3.98515		3.01941												1711
																								1710		3.74244	3.66223	3.29507		3.25735		3.16849	3.90817	3.01172		3.48972												1712
																								1711		3.21244	3.23593	3.69642		3.31469		3.09791	7.94309	3.59113		4.70258												1713
																								1712		3.24922	15.9908	4.39228		3.06575		3.02771	10.1714	3.84983		3.62632												1714
																								1713		3.80021	11.2504	4.25026		3.33755		5.21915	9.14173	4.04128		3.3102												1715
																								1714		3.04507	3.16226	3.39049		3.58456		4.47751	10.753	3.24949		3.62136												1716
																								1715		3.11436	7.18002	4.12551		3.06198		4.30319	3.01845	3.74581		3.9648												1717
																								1716		3.20109	10.6055	3.66823		4.61589		3.00766	8.77219	3.76636		3.13368												1718
																								1717		3.37826	5.51059	3.13142		3.41363		4.54579	3.50616	3.80728		4.20378												1719
																								1718		3.32865	12.7467	3.98302		3.01096		3.39006	4.75166	6.49169		4.07345												1720
																								1719		3.06206	12.9	4.18556		3.73746		5.69657	6.39251	4.3643		3.20083												1721
																								1720		4.01729	4.03499	3.95014		3.21606		6.39166	9.75205	4.44993		3.04702												1722
																								1721		3.14715	10.4501	4.35936		3.49519		6.03031	7.42002	3.41718		4.74386												1723
																								1722		5.42753	3.68155	3.32226		3.53703		7.86999	5.13259	3.75303		4.75085												1724
																								1723		9.68682	3.39303	4.36725		3.12399		4.50506	3.67189	4.491		3.12886												1725
																								1724		4.58175	10.8993	3.87605		3.67075		3.34457	9.72496	3.20503		3.22797												1726
																								1725		3.15007	7.13531	3.03815		5.07871		3.23804	9.75049	4.05037		3.02007												1727
																								1726		5.09898	7.32315	3.46171		7.72069		3.42832	7.53473	4.10457		4.4732												1728
																								1727		3.94476	12.4373	3.21153		3.05014		4.91154	3.15915	4.01784		6.35925												1729
																								1728		4.06637	3.00247	3.56994		4.86607		6.06372	7.03923	4.73197		3.42999												1730
																								1729		3.27613	4.199	4.37238		3.05806		3.35875	6.78428	4.65282		3.29373												1731
																								1730		3.0652	3.08143	3.14801		3.70473		3.83526	8.79278	5.63843		4.15818												1732
																								1731		3.37458	13.0675	5.50869		3.13561		4.2486	8.9752	3.14551		4.5212												1733
																								1732		3.66124	10.3234	3.46447		3.29182		3.3665	8.86958	4.49243		3.20572												1734
																								1733		5.58873	9.94433	4.01009		3.88471		3.09941	3.75807	4.63732		4.62281												1735
																								1734		3.09556	11.8314	3.21915		3.06381		3.60693	3.70228	3.00587		3.14579												1736
																								1735		3.746	10.9372	4.11427		3.41646		3.98677	6.8659	4.34904		4.05267												1737
																								1736		3.97194	8.24998	3.0513		4.83746		3.33999	5.97879	5.82644		3.39284												1738
																								1737		3.68588	3.96645	3.22219		3.70709		5.41383	8.81571	4.25505		3.70777												1739
																								1738		4.51888	6.68301	6.2516		3.03422		3.15749	5.48871	6.05901		3.39972												1740
																								1739		3.02469	7.1012	3.56246		4.13014		3.83388	3.00787	4.31593		3.83868												1741
																								1740		3.48259	6.01987	5.03356		13.4686		3.38285	3.21804	3.20189		3.66404												1742
																								1741		3.56466	3.43074	3.18056		3.52436		3.70715	4.37059	5.42868		3.59182												1743
																								1742		3.54636	8.78406	3.12799		3.88202		3.07219	3.38871	3.36439		3.1192												1744
																								1743		3.43184	8.25218	3.65015		4.03599		4.68924	12.6289	3.47545		4.78173												1745
																								1744		3.61381	9.29009	3.00019		3.17794		3.21824	7.12182	3.554		4.80382												1746
																								1745		3.04741	11.0767	3.67541		3.01646		3.49974	8.27062	3.47563		3.98163												1747
																								1746		3.58021	4.92719	3.15961		3.77317		3.05499	9.05559	4.21309		3.70315												1748
																								1747		3.93139	3.15316	4.59347		3.08052		4.052	4.10051	4.94357		3.21888												1749
																								1748		3.49579	3.44626	3.43586		3.04969		3.27622	9.94525	4.03391		3.05835												1750
																								1749		3.82784	4.50508	3.61514		3.25966		3.28167	10.9582	3.64164		3.40748												1751
																								1750		3.24233	3.26534	3.60438		3.11497		3.16906	3.98494	3.9126		4.36209												1752
																								1751		3.20314	4.20578	4.87227		3.25389		3.24517	8.78427	4.152		4.02171												1753
																								1752		3.5643	3.63743	3.07195		3.59043		3.35198	8.95691	3.6447		3.09817												1754
																								1753		3.41042	4.87658	3.73175		4.30478		3.54769	8.06725	4.43149		4.16527												1755
																								1754		3.41216	3.07014	3.23349		3.07678		3.96843	6.21856	3.82205		3.63874												1756
																								1755		3.41241	3.19824	4.3328		3.20723		6.16981	9.24387	3.6087		3.69257												1757
																								1756		3.34759	4.8474	3.18768		3.01207		3.66287	4.16323	4.58408		3.10029												1758
																								1757		3.52939	3.28966	3.31904		3.87521		3.76696	7.94308	4.80655		4.21934												1759
																								1758		3.07123	3.58689	3.35109		3.21299		4.18652	8.74392	4.36082		3.76135												1760
																								1759		3.10483	3.33269	3.41026		3.65383		3.38705	11.2081	4.66475		3.96359												1761
																								1760		3.48042	8.92208	4.33874		4.1935		4.71504	11.0041	6.5812		3.42713												1762
																								1761		3.2201	3.78856	3.72603		3.49013		5.09361	3.48841	4.72387		5.17081												1763
																								1762		3.08152	3.40469	3.15614		3.51969		3.025	11.3575	3.90167		3.38898												1764
																								1763		3.17218	4.01538	3.91984		3.11297		4.06342	11.0386	4.11326		3.77003												1765
																								1764		4.05192	6.50726	3.59339		3.10217		3.84562	11.1382	3.2998		4.84873												1766
																								1765		7.34361	3.46151	3.74887		4.59159		3.07759	6.20384	3.24762		6.17623												1767
																								1766		4.18083	5.46713	3.14411		3.29732		3.65358	3.48542	3.35532		3.02114												1768
																								1767		3.26948	3.59035	4.65509		3.21495		3.47467	3.17028	3.01269		3.2379												1769
																								1768		4.40123	4.71428	3.72712		4.70921		3.03323	6.75068	3.34356		3.319												1770
																								1769		3.2472	4.62609	5.18998		3.05571		4.99317	6.40036	3.90343		3.24663												1771
																								1770		3.46398	4.06794	4.44471		4.34872		3.61303	4.83796	3.84424		3.41039												1772
																								1771		3.72897	6.16715	3.65225		3.23382		4.79121	9.05978	3.03907		3.22508												1773
																								1772		3.01222	6.34707	4.05062		3.87405		4.46335	8.75865	3.28319		4.36415												1774
																								1773		3.49794	3.32414	4.33797		3.79551		3.10103	8.05723	3.10229		3.71944												1775
																								1774		3.05429	9.52035	3.93756		3.08863		4.61586	8.81501	5.62332		4.08897												1776
																								1775		3.51534	3.03123	3.17826		3.23421		4.64447	7.27265	3.32125		6.69497												1777
																								1776		3.03793	3.61167	3.19217		3.03811		3.69653	4.7572	3.16307		3.55889												1778
																								1777		3.48859	6.47613	3.03203		4.21391		4.59828	5.79839	3.56151		3.00339												1779
																								1778		3.24798	7.87919	3.96941		4.03764		3.57872	5.4833	4.23304		4.05705												1780
																								1779		3.48259	3.19062	3.57791		3.50979		3.84794	7.98625	4.25946		4.14903												1781
																								1780		4.27849	13.6987	3.4671		3.47197		4.1137	4.06281	3.96111		4.18742												1782
																								1781		3.29289	6.19574	3.38764		3.11529		4.55298	5.64809	3.65297		3.32759												1783
																								1782		3.1435	9.37436	3.55589		5.76458		3.5472	8.6588	3.03641		3.12318												1784
																								1783		3.10081	8.33626	4.02938		3.02814		5.90094	9.33582	4.81814		3.14413												1785
																								1784		3.02191	8.94421	3.9473		3.32562		3.89287	3.0418	4.33331		6.61781												1786
																								1785		4.55537	8.34239	3.52243		4.99782		3.26181	5.29328	4.49572		5.42789												1787
																								1786		4.4587	8.45237	3.06756		3.71182		4.08309	4.84885	5.07393		5.15101												1788
																								1787		3.50562	7.41342	3.13781		3.22078		3.04085	6.17812	3.67377		3.81106												1789
																								1788		6.97949	9.19298	3.73155		3.6071		4.06297	5.51305	5.36562		3.09007												1790
																								1789		3.06565	4.1272	4.83812		3.31878		6.06176	5.44221	3.12769		3.17407												1791
																								1790		3.64251	12.2015	3.50829		3.14527		4.23058	5.11026	4.45618		3.02442												1792
																								1791		3.70107	11.758	3.70894		3.07146		4.08349	3.08253	3.22864		3.85312												1793
																								1792		3.59077	9.90185	3.07019		3.38344		3.63582	3.90278	3.38345		4.7197												1794
																								1793		3.00962	4.95147	3.47817		3.05486		3.00996	4.36398	4.35243		4.14983												1795
																								1794		3.1238	6.50101	3.73929		3.1779		4.25059	9.57309	5.72162		3.10137												1796
																								1795		3.09839	8.97937	3.03071		3.30201		4.52175	5.00161	6.76738		3.50846												1797
																								1796		3.34456	9.94563	5.28896		3.4888		3.45719	3.05781	3.78179		4.20673												1798
																								1797		3.18376	4.07498	4.66158		3.70329		3.33965	7.72526	3.41742		3.98573												1799
																								1798		3.14311	10.4505	3.7961		3.38953		5.41012	10.4782	4.09769		3.31771												1800
																								1799		3.04562	5.02266	3.13161		3.62292		3.46747	3.93158	4.36234		4.306												1801
																								1800		3.02159	13.917	3.04309		3.29207		4.16783	5.65029	3.86278		4.74604												1802
																								1801		3.26664	3.2697	3.43067		4.16514		3.61584	5.83519	3.15483		4.07487												1803
																								1802		3.07213	8.33891	3.32988		3.2785		3.83753	8.07051	4.48923		3.16377												1804
																								1803		3.11002	7.94473	3.62569		4.06817		4.17458	4.75937	4.49788		3.81303												1805
																								1804		4.07486	5.96453	3.67732		3.97986		3.49463	7.26932	3.24477		3.03768												1806
																								1805		3.18832	9.86073	3.10711		3.10321		3.03993	8.07362	3.09967		3.09053												1807
																								1806		3.26015	9.63261	3.05092		3.0507		4.04692	7.03754	3.57552		3.39509												1808
																								1807		4.35388	17.9649	3.30246		3.84641		3.18867	6.32002	4.81936		3.14713												1809
																								1808		3.56398	9.39917	3.41887		3.40419		3.36402	5.13097	3.14331		3.76261												1810
																								1809		3.02897	4.79424	3.74743		3.77646		3.25355	3.55627	3.31553		3.89346												1811
																								1810		3.4353	11.7687	4.01841		3.48209		4.21008	11.5204	4.46547		4.53381												1812
																								1811		3.5077	4.32425	3.06993		3.83086		4.97993	6.43019	3.46556		3.60164												1813
																								1812		3.80224	5.58422	3.20682		3.09398		3.37829	3.39722	3.43029		3.22514												1814
																								1813		3.53784	15.9837	3.06399		3.26498		3.80363	6.43278	3.149		3.7543												1815
																								1814		3.94808	4.20209	3.08894		4.46902		3.51965	6.67765	4.53085		4.00722												1816
																								1815		3.3957	7.98801	3.85403		3.27607		3.46344	3.35388	4.61241		3.04572												1817
																								1816		3.58041	10.2502	3.51873		3.66976		3.42337	3.21084	4.06023		3.16779												1818
																								1817		3.58836	8.92335	3.07775		3.16689		3.36021	4.3814	4.75985		5.04599												1819
																								1818		3.12263	7.91692	3.40685		8.59909		3.8512	3.82949	3.16647		3.62582												1820
																								1819		3.27809	6.82182	3.95122		5.95156		3.15625	3.17285	3.24589		3.14662												1821
																								1820		5.02536	6.19291	3.6189		3.39289		3.43927	3.11262	5.16485		3.94281												1822
																								1821		3.79733	15.723	3.10823		3.12334		3.07615	3.59164	4.76952		3.22911												1823
																								1822		3.2718	7.02951	3.18491		3.09459		3.1723	8.71034	4.22311		3.6503												1824
																								1823		3.23605	10.2532	3.0845		3.62936		5.10335	5.7766	3.0334		4.38732												1825
																								1824		3.14299	5.94432	3.2873		3.09907		6.12988	3.679	3.43603		3.03538												1826
																								1825		4.19086	6.73948	3.6889		3.44884		3.62186	5.78323	6.34766		5.5671												1827
																								1826		3.75183	10.7794	4.87499		5.36562		3.72117	4.35163	5.9056		3.19622												1828
																								1827		3.38836	9.27748	3.47465		3.32926		3.23299	4.60129	4.05908		4.11869												1829
																								1828		3.09486	8.75385	3.07244		3.84627		3.21465	7.56347	5.67149		5.91374												1830
																								1829		3.81083	9.45184	3.13019		3.28015		4.04598	4.73214	5.6444		4.22608												1831
																								1830		3.39648	9.85697	3.05414		4.02384		3.99007	7.54779	3.5335		3.16477												1832
																								1831		3.32825	4.39319	3.57511		3.53002		4.15405	8.4757	3.27617		3.07814												1833
																								1832		3.07751	4.84196	3.18272		3.29567		3.88732	3.11909	7.05082		3.34679												1834
																								1833		3.02189	7.59642	3.38218		3.7769		5.45671	10.1047	4.13138		3.7664												1835
																								1834		3.37757	10.7648	4.28437		3.33145		3.6916	4.44506	4.28085		4.56935												1836
																								1835		3.22222	6.48328	3.4123		3.40558		5.20851	5.6358	4.71309		4.84134												1837
																								1836		3.48053	11.1515	4.64432		3.33675		4.05131	3.51488	3.27081		4.69098												1838
																								1837		3.20899	8.70074	4.00054		3.51084		3.94023	4.91052	5.35138		3.06685												1839
																								1838		3.25259	7.66291	3.24276		3.28243		4.21053	4.03813	5.171		3.76558												1840
																								1839		3.24303	11.3045	3.69206		3.40687		3.89487	3.77868	3.02162		4.12605												1841
																								1840		3.1392	7.86089	3.21207		3.59989		3.63266	5.10327	3.3196		3.35871												1842
																								1841		3.10849	8.25485	4.48459		3.92236		5.82395	3.01808	3.55629		4.80998												1843
																								1842		9.1083	10.2276	3.87621		3.05777		5.32313	3.07312	3.00904		3.86885												1844
																								1843		3.57357	5.03397	4.47687		3.03783		4.68483	3.2176	4.9773		3.28857												1845
																								1844		3.58315	11.5128	5.67826		3.53331		4.24693	5.48376	4.58889		6.04808												1846
																								1845		3.00087	9.94777	3.30422		3.17252		4.12857	4.68938	3.16601		3.3862												1847
																								1846		3.56175	7.22445	3.54655		4.41663		4.47643	4.96786	3.03344		5.44438												1848
																								1847		3.8337	7.08371	4.00201		3.76745		5.83898	5.47354	3.6218		3.05373												1849
																								1848		3.78638	8.59473	3.47743		3.26443		3.35079	5.53104	4.39729		4.94278												1850
																								1849		3.20182	9.48575	4.30946		4.01628		9.05237	3.96341	5.29769		3.21004												1851
																								1850		3.62586	6.49583	3.00921		3.62361		6.05541	3.86541	4.71867		3.77825												1852
																								1851		4.45247	6.35537	4.07806		3.58036		3.24999	3.64539	4.40847		6.00358												1853
																								1852		3.40758	11.5972	4.30587		4.10733		3.89147	3.79653	3.76101		7.37112												1854
																								1853		3.08239	7.71114	3.36919		4.02205		4.52517	3.91708	3.70569		3.63719												1855
																								1854		3.44596	8.06256	3.09898		4.01001		4.28684	3.41351	3.46431		3.75014												1856
																								1855		3.27916	8.25894	4.4125		4.07739		4.53726	3.92927	5.01834		3.17094												1857
																								1856		3.54864	9.90985	3.12654		4.18295		3.33603	3.35072	3.92312		4.03728												1858
																								1857		5.00873	8.37027	3.07965		3.21005		3.57598	5.78742	5.21918		4.11197												1859
																								1858		3.29225	7.82566	3.85843		3.51471		3.27289	3.88477	4.00541		5.67705												1860
																								1859		4.00184	9.43249	4.33633		5.28518		3.65155	3.66898	4.87819		3.89924												1861
																								1860		3.31195	12.3922	3.01194		3.07643		3.9654	5.22907	3.09527		5.48516												1862
																								1861		3.96948	3.24113	3.89248		4.15617		3.76794	3.63587	3.6434		3.18971												1863
																								1862		4.30595	17.1153	3.00424		3.28779		3.49925	3.76479	3.49168		3.46616												1864
																								1863		3.05176	10.3024	3.00327		3.50498		3.92046	3.10694	5.47933		5.50874												1865
																								1864		3.15499	10.0576	5.07856		3.5843		3.19189	4.13421	4.73466		5.01686												1866
																								1865		4.06717	6.85456	3.03271		3.28881		3.04827	3.12141	6.2198		8.1428												1867
																								1866		3.10686	6.63271	3.14897		3.15031		4.11739	3.25471	3.95595		8.21522												1868
																								1867		3.23436	6.90818	3.14863		3.21943		3.4077	5.11659	3.68102		3.37233												1869
																								1868		3.26723	9.72448	3.38472		3.41045		6.0879	3.81692	3.94569		3.75475												1870
																								1869		3.69802	8.11346	3.1387		3.09328		4.27799	4.32055	6.48426		5.44124												1871
																								1870		3.52435	3.488	5.17213		3.50232		4.61609	5.69847	4.07834		3.14344												1872
																								1871		3.84657	9.20691	3.6441		3.96506		4.17314	5.50953	5.90592		3.68819												1873
																								1872		3.07878	8.44589	3.45885		3.16809		4.33055	3.03663	6.14074		6.51497												1874
																								1873		3.87272	13.3924	3.99116		4.13586		3.56868	3.68102	3.9751		3.91444												1875
																								1874		3.30469	5.73784	4.2702		3.19242		4.33086	3.00454	3.93667		3.12354												1876
																								1875		3.07021	7.8405	4.46949		3.08012		3.39591	4.0801	3.74945		3.19775												1877
																								1876		3.37206	8.44363	4.45716		3.31343		3.08344	4.9567	6.02591		3.25515												1878
																								1877		3.34228	7.85132	3.51973		3.49187		3.20975	3.21949	3.35204		3.2789												1879
																								1878		3.78141	9.22081	3.05739		3.03847		4.51028	3.42673	4.55929		3.03162												1880
																								1879		4.08473	7.78915	3.12687		3.0447		4.51184	3.96202	3.14758		3.27525												1881
																								1880		3.09228	12.7715	3.18497		3.3554		3.79095	3.4132	3.69274		3.25452												1882
																								1881		3.41416	7.07085	3.29807		3.50361		4.91715	4.17389	4.68895		4.75789												1883
																								1882		3.13339	5.46992	3.74626		3.06865		3.02882	3.15746	3.98374		3.4486												1884
																								1883		3.99231	7.0476	4.07307		3.12939		3.01884	4.13488	3.9349		4.33767												1885
																								1884		3.17632	8.41317	3.25846		3.74424		3.1081	5.16839	3.80473		3.11501												1886
																								1885		3.18263	4.13562	3.40201		4.17407		3.00116	5.09789	3.85997		3.46988												1887
																								1886		4.19039	7.13483	3.02188		3.92878		3.30147	3.4639	3.6966		3.22637												1888
																								1887		3.08004	4.52485	3.58281		5.12668		3.65139	5.50182	4.09915		3.89886												1889
																								1888		3.17518	8.48183	3.08922		8.7762		3.11862	4.77895	3.33933		3.08768												1890
																								1889		3.40502	8.72274	3.19377		3.85473		3.62194	3.62653	4.64387		3.58929												1891
																								1890		3.33796	5.99267	3.24713		3.7766		3.26391	4.5245	3.49282		3.32382												1892
																								1891		3.62772	7.24296	5.99053		3.44213		3.39965	3.46664	4.95294		4.09098												1893
																								1892		4.4871	5.27639	3.02989		3.55665		3.86027	3.50366	5.36723		3.10473												1894
																								1893		4.83443	6.73251	3.4304		3.01092		4.27596	4.98394	3.89875		3.30256												1895
																								1894		3.26801	6.19654	3.13659		3.70211		5.13868	3.69153	3.05298		4.38562												1896
																								1895		5.61217	3.67658	4.32643		3.07085		8.87292	3.3049	3.45563		4.05534												1897
																								1896		3.9023	12.4508	3.47328		3.29073		3.67897	3.37411	4.25586		3.52519												1898
																								1897		3.60126	12.6155	4.27468		3.74662		3.02471	4.73672	4.65602		4.66458												1899
																								1898		3.17068	5.05806	3.52525		3.97139		4.29624	3.48504	3.5273		3.39651												1900
																								1899		3.20525	3.09514	3.61647		3.03801		3.07186	4.23241	3.8197		3.59354												1901
																								1900		3.20361	6.41273	3.11216		3.12311		3.42335	4.85495	4.0753		4.94351												1902
																								1901		3.0577	9.95274	4.09139		3.10118		3.56651	3.32114	3.5718		3.24666												1903
																								1902		3.463	14.4198	3.62702		3.13615		3.36115	3.62212	5.07678		3.08981												1904
																								1903		3.16902	6.43988	3.49139		3.80559		3.71583	4.3731	5.22926		3.42173												1905
																								1904		3.90052	10.0425	3.63904		3.11811		4.37927	3.20878	3.92221		4.25526												1906
																								1905		3.25683	4.29898	3.40394		3.04032		3.67	3.08358	4.69258		3.29183												1907
																								1906		3.09519	9.46335	3.33438		3.56048		4.88557	3.04825	3.40486		5.19772												1908
																								1907		3.56304	10.245	3.74301		3.24162		4.45114	3.06218	4.20383		3.47914												1909
																								1908		3.44777	7.50774	3.0956		3.41974		8.41474	3.33941	4.27918		3.05974												1910
																								1909		3.78645	9.25411	3.8507		3.09403		6.12521	3.01144	3.04723		3.52567												1911
																								1910		4.66373	8.28405	3.79836		3.30334		3.08726	4.30118	5.24831		3.51796												1912
																								1911		3.02748	8.15607	4.01389		3.0606		3.49022	4.0011	3.09855		4.22352												1913
																								1912		3.27032	7.87987	3.60405		3.11386		3.08638	3.79458	4.67856		3.79062												1914
																								1913		3.4087	7.39824	4.34608		4.23443		3.31103	3.97521	5.89802		3.28295												1915
																								1914		7.50247	6.45787	3.60347		3.66129		3.02187	3.27652	4.23166		3.31478												1916
																								1915		3.42181	7.23005	3.61632		3.0464		3.11447	4.89481	4.46856		3.32409												1917
																								1916		3.03501	9.83767	3.12395		3.20913		3.17495	3.29448	3.68737		3.28663												1918
																								1917		5.30141	9.9811	3.24629		3.76233		3.47976	8.39432	5.20008		3.20825												1919
																								1918		3.55289	10.2183	3.07642		3.01298		3.13746	3.07921	3.16748		4.84387												1920
																								1919		3.75701	6.49158	3.01233		3.71259		3.1448	3.64713	4.91693		3.0437												1921
																								1920		3.08995	7.37927	3.10656		3.08114		5.91974	3.27653	3.11601		3.32382												1922
																								1921		3.25115	7.57653	3.46364		3.82151		3.99172	3.46648	4.15796		3.19646												1923
																								1922		3.2044	9.34031	3.34588		4.31723		3.48054	3.20226	3.7449		3.0365												1924
																								1923		3.16786	5.68929	3.03187		3.14104		4.78857	3.43624	3.98843		3.60734												1925
																								1924		4.03106	15.622	3.05384		3.48768		3.27451	3.28504	3.42602		4.81995												1926
																								1925		3.74097	3.44723	4.24724		3.0487		3.39968	3.03959	4.6772		3.90312												1927
																								1926		3.0755	5.00753	4.84275		3.11233		3.28297	3.95792	3.37598		4.24892												1928
																								1927		3.06153	6.87595	3.12535		3.92601		4.28486	3.44137	5.01935		3.24844												1929
																								1928		3.51823	5.62987	4.14704		7.22016		3.18276	3.56883	3.49981		3.9218												1930
																								1929		3.12298	11.6818	4.62129		3.35764		3.00298	3.04528	3.01364		3.84913												1931
																								1930		4.51443	9.89168	3.08776		3.96979		4.71096	3.43778	3.44393		3.00364												1932
																								1931		4.12001	7.75581	3.57504		3.92919		3.95148	5.05026	4.48641		4.47223												1933
																								1932		3.32743	8.01792	3.70556		3.30521		4.60387	4.71657	7.67988		3.11032												1934
																								1933		3.47587	5.52985	3.37083		3.10239		3.75226	6.36873	3.35285		4.59293												1935
																								1934		3.64565	10.8631	3.33136		3.3157		3.42299	3.47893	4.31584		3.06892												1936
																								1935		4.08517	9.75986	3.62144		5.50845		4.42964	3.75624	5.89867		3.5052												1937
																								1936		5.22391	6.70986	4.39716		3.36135		3.71079	7.75675	3.62653		3.56887												1938
																								1937		3.06448	7.29354	3.66912		4.06913		4.34336	4.45252	3.00847		3.25434												1939
																								1938		3.95991	6.33835	3.27023		3.20886		3.27655	6.07385	3.23308		3.62574												1940
																								1939		3.52451	7.50012	3.1142		3.18453		4.49016	6.19363	3.41868		4.05633												1941
																								1940		3.63098	10.7497	3.51458		6.55029		3.55548	4.03722	4.50794		3.99842												1942
																								1941		4.07972	7.36189	3.52725		3.69999		3.25435	4.25789	3.64708		5.03189												1943
																								1942		3.12773	6.21353	3.33692		3.30512		4.14173	3.08384	4.40505		4.2312												1944
																								1943		3.52762	7.41007	3.35634		5.13171		4.25511	6.71671	3.50111		3.98586												1945
																								1944		3.62422	9.45575	3.89361		3.95109		4.78311	3.64448	5.54756		4.32364												1946
																								1945		3.8578	9.12528	3.2413		3.53231		3.54161	3.10161	6.07294		3.15823												1947
																								1946		3.81533	5.85748	3.74484		5.13274		3.8505	3.66062	4.0358		3.04135												1948
																								1947		4.63189	4.95912	3.02352		3.3356		4.69963	3.81636	3.87146		4.07061												1949
																								1948		3.64536	8.61318	3.16509		3.05245		4.34903	6.53822	4.57717		3.37895												1950
																								1949		3.18258	8.372	3.40275		4.27422		5.85006	3.99042	3.50464		3.69333												1951
																								1950		3.19678	11.4392	3.01644		5.8913		3.21892	6.43657	3.23464		7.16369												1952
																								1951		4.73375	5.80774	3.4163		3.81717		3.26709	13.1121	3.51565		4.10464												1953
																								1952		6.54493	9.52873	4.01677		4.89852		3.9202	3.20359	3.92004		3.08173												1954
																								1953		3.28661	8.45214	3.50236		4.34345		3.50343	3.45578	3.18389		3.85489												1955
																								1954		3.16717	7.38504	3.18973		3.69183		6.47649	8.6574	3.78821		3.75952												1956
																								1955		4.52646	9.71565	3.24483		3.2321		3.33554	7.24725	4.52169		3.04502												1957
																								1956		3.71473	3.22457	3.3255		3.19509		3.31529	8.55576	6.23596		3.14902												1958
																								1957		3.44028	6.37533	3.73576		3.61493		3.17542	6.89606	3.4931		3.13173												1959
																								1958		3.10194	4.94802	3.97354		3.10444		6.18224	10.2602	3.06257		3.95224												1960
																								1959		3.19095	3.8973	3.25212		5.47214		5.21942	4.09483	3.77773		3.47416												1961
																								1960		4.17889	11.1709	3.75282		3.41896		4.73582	4.08731	4.06611		3.83202												1962
																								1961		4.30386	10.2581	3.04199		3.05628		3.22695	3.84377	3.2758		3.20935												1963
																								1962		3.40948	7.26831	3.7608		4.12051		3.78857	3.45226	3.5648		3.99304												1964
																								1963		3.453	6.34551	3.26597		3.07769		4.5741	3.52391	5.18412		3.78487												1965
																								1964		4.53734	12.1768	3.3418		3.76018		3.90368	3.5071	5.17419		3.13762												1966
																								1965		3.15429	3.07539	3.06307		3.63277		3.55614	3.01558	4.25424		3.06644												1967
																								1966		3.50667	4.74891	4.36805		4.3337		3.86178	3.72221	4.49926		3.4642												1968
																								1967		3.30702	9.66405	4.51502		5.46515		3.7085	3.10352	3.1225		3.6649												1969
																								1968		3.54883	8.00476	4.12066		3.81252		6.34478	3.22598	4.59969		3.06128												1970
																								1969		4.24383	7.36763	6.42723		4.03824		3.0764	3.45458	3.26595		3.88521												1971
																								1970		4.19376	11.3014	3.10586		3.68442		3.27907	3.30834	3.39733		3.2266												1972
																								1971		3.59665	8.69097	4.02804		4.94995		3.7908	3.21436	4.23134		3.8121												1973
																								1972		3.76256	3.39089	4.33239		4.08684		4.01758	3.04565	6.18816		3.568												1974
																								1973		3.09807	3.36253	4.08215		3.48236		3.12076	3.02141	3.17338		3.33466												1975
																								1974		3.04503	10.6688	4.35007		3.88302		3.08015	3.76796	3.04953		3.98915												1976
																								1975		3.36048	9.80197	5.23139		3.11159		4.24775	4.09978	3.17875		3.9939												1977
																								1976		3.50779	6.63145	3.10698		3.93862		8.6447	3.6428	3.02549		4.08232												1978
																								1977		3.68584	7.40008	5.61745		3.22717		5.31701	3.11513	3.34604		3.41042												1979
																								1978		3.24131	7.3533	3.59051		4.1798		3.14328	3.29357	4.10698		4.15774												1980
																								1979		3.31476	8.06517	3.55573		3.82361		3.03154	10.8103	3.26291		4.01743												1981
																								1980		3.81614	7.82434	3.82185		7.24237		3.3488	8.78692	3.88362		3.07412												1982
																								1981		3.17479	6.03725	3.54148		6.32916		3.09409	7.24208	4.27939		3.48033												1983
																								1982		3.98289	10.8113	4.9065		3.31645		3.0149	7.8374	3.52057		3.03403												1984
																								1983		5.02491	6.8173	3.06082		4.14715		3.41911	3.09255	3.32453		3.63032												1985
																								1984		3.67058	13.0858	3.41217		4.39963		4.57438	8.24715	3.19342		3.88969												1986
																								1985		3.12317	11.0573	6.32588		5.68621		4.67701	8.63453	3.86755		4.72354												1987
																								1986		3.59889	9.13301	3.99817		3.11244		3.06347	10.6425	3.52681		3.71257												1988
																								1987		3.76513	8.77295	3.26595		4.40629		3.06217	9.92906	4.05553		4.11556												1989
																								1988		3.51352	7.88244	4.6144		4.7409		3.1109	3.46339	3.67129		4.57297												1990
																								1989		3.59663	3.42195	3.78602		3.84902		3.85846	3.47655	3.03716		4.15217												1991
																								1990		3.48621	3.38614	3.19321		3.941		3.03662	3.58347	4.12658		3.20955												1992
																								1991		3.85989	7.22894	3.17354		3.01036		4.97424	3.49604	3.73306		3.60923												1993
																								1992		3.47123	3.20081	3.67127		4.18318		3.52714	12.3535	3.34611		4.31729												1994
																								1993		4.39669	10.5977	3.15126		3.1658		3.03741	7.9692	3.45975		3.91482												1995
																								1994		3.96464	4.26505	3.35864		4.30937		3.20354	9.52325	4.36767		4.17842												1996
																								1995		3.19097	3.39564	3.20422		3.29351		4.59225	5.64764	3.40692		4.57206												1997
																								1996		3.61171	6.35641	3.01661		3.15037		3.69841	3.37062	3.71661		4.65309												1998
[truncated: 6,164 more rows]
[truncated: 10 more columns]
