# Supplementary material for: Excitatory neurotransmission activates compartmentalized calcium transients in Müller glia without affecting lateral process motility
Source: eLife. 2021 Dec 16;10:e73202. doi: 10.7554/eLife.73202 (PMC8806189; doi:10.7554/eLife.73202)
Supplement: Figure 5—source data 1. [file elife-73202-fig5-data1.xlsx]

## Sheet: Figure 5-source data 1
	# stable/motile processes, P8-P11, gabazine, pooled FOVs (Figure 5F, Table 20)				# stable/motile processes, P8-P11, pirenzepine, pooled FOVs (Figure 5F, Table 20)				# stable/motile processes, P10-P11, TBOA, pooled FOVs (Figure 5F, Table 20)				# stable/motile processes, P10-P11, DNQX/AP5, pooled FOVs (Figure 5F, Table 20)
	ACSF	gabazine			control	pirenzepine			ACSF	TBOA			control	DNQX/AP5
stable	31	48		stable	157	169		stable	70	80		stable	159	181
motile	270	340		motile	788	759		motile	436	452		motile	794	724
total	301	388		total	945	928		total	506	532		total	953	905
	Proportion total stable processes, P8-P11, gabazine, per FOV (Figure 5F, Table 20)				Proportion total stable processes, P8-P11, pirenzepine, per FOV (Figure 5F, Table 20)				Proportion total stable processes, P10-P11, TBOA, per FOV (Figure 5F, Table 20)				Proportion total stable processes, P10-P11, DNQX/AP5, per FOV (Figure 5F, Table 20)
FOV #	ACSF	gabazine		FOV #	control	pirenzepine		FOV #	ACSF	TBOA		FOV #	control	DNQX/AP5
1	0.0833333	0.0555556		1	0.0625	0.117647		1	0.195876	0.252747		1	0.0625	0.117647
2	0	0.0740741		2	0.0689655	0.0833333		2	0.261905	0.320513		2	0.0689655	0.0833333
3	0.0645161	0.0833333		3	0.0769231	0.172414		3	0.0704225	0.117647		3	0.0769231	0.172414
4	0.226415	0.253521		4	0.113636	0.228571		4	0.078125	0.0864198		4	0.113636	0.228571
5	0.0789474	0.113636		5	0.253521	0.37037		5	0.05	0.0645161		5	0.253521	0.37037
6	0.0227273	0.117647		6	0.258065	0.423077		6	0.101124	0.123457		6	0.258065	0.423077
7	0.131148	0.0789474		7	0.222222	0.173077		7	0.131148	0.0490196		7	0.222222	0.173077
				8	0.266667	0.177419						8	0.266667	0.177419
				9	0.252874	0.19697						9	0.252874	0.19697
				10	0.0789474	0.15625						10	0.0789474	0.15625
				11	0.117647	0.0416667						11	0.117647	0.0416667
				12	0.105263	0.111111						12	0.105263	0.111111
				13	0.0879121	0.102273						13	0.0879121	0.102273
				14	0.166667	0.158537
	# stable/motile processes, P12, carbachol iontophoresis, pooled FOVs (Figure 5F, Table 20)				# stable/motile processes, P9, glutamate iontophoresis, pooled FOVs (Figure 5F, Table 20)				# stable/motile processes, P12, BAPTA, pooled FOVs (Figure 5F, Table 20)
	control iontophoresis	carbachol iontophoresis			control iontophoresis	glutamate iontophoresis			control	BAPTA
stable	147	164		stable	27	25		stable	67	87
motile	1111	969		motile	156	146		motile	268	321
total	1258	1133		total	183	171		total	335	408
	Proportion total stable processes, P12, carbachol iontophoresis, pooled FOVs (Figure 5F, Table 20)				# stable/motile processes, P24, glutamate iontophoresis, pooled FOVs (Figure 5F, Table 20)				Proportion total stable processes, P12, BAPTA, per FOV (Figure 5F, Table 20)
FOV #	control iontophoresis	carbachol iontophoresis			control iontophoresis	glutamate iontophoresis		FOV #	control	BAPTA
1	0.0684932	0.0617284		stable	43	53		1	0.220588	0.325
2	0.0818182	0.0689655		motile	13	23		2	0.2	0.318182
3	0.125	0.23913		total	56	76		3	0.184615	0.218182
4	0.186916	0.210938						4	0.224138	0.188679
5	0.205128	0.161765			Proportion total stable processes, P9/P24, glutamate iontophoresis, per FOV (Figure 5F, Table 20)			5	0.175676	0.0895522
6	0.163265	0.1875		FOV #	control iontophoresis	glutamate iontophoresis		6		0.180556
7	0.209302	0.173077		P9 (FOV 1)	0.1875	0.168224
8	0.130435	0.284091		P9 (FOV 2)	0.103448	0.109375
9	0.0974026	0.169811		P24 (FOV 1)	0.866667	0.703704
10	0.129032	0.146341		P24 (FOV 2)	0.653846	0.693878
11	0.111111	0.106383
12	0.0294118	0.0930233
13	0.0816327	0.0666667
14	0.0666667	0.047619
15	0.0864198	0.109589
16	0.0869565	0.0465116
