# Supplementary material for: Excitatory neurotransmission activates compartmentalized calcium transients in Müller glia without affecting lateral process motility
Source: eLife. 2021 Dec 16;10:e73202. doi: 10.7554/eLife.73202 (PMC8806189; doi:10.7554/eLife.73202)
Supplement: Figure 6—source data 1. [file elife-73202-fig6-data1.xlsx]

## Sheet: Sheet1
	Comparisons of morphological properties between wild type and β2-nAChR-KO Müller glia at P12 and P30+ (Figure 6D, Table 21)
	# branch points				stalk length (µm)				process length (µm)				# tips				convex hull area (µm2)				# branches off stalk
	P12		P30+		P12		P30+		P12		P30+		P12		P30+		P12		P30+		P12		P30+
cell #	WT	KO	WT	KO	WT	KO	WT	KO	WT	KO	WT	KO	WT	KO	WT	KO	WT	KO	WT	KO	WT	KO	WT	KO
1	65	104	84	89	52.32	47.41	53.69	43.53	474.5	803.43	569.904	682.971	74	115	90	104	367.521	594.819	287.613	337.716	37	31	38	36
2	64	76	60	97	54.83	40.27	52.83	49.56	421.438	494.909	594.575	822.64	65	88	70	114	304.062	282.432	306.2	838.139	27	34	40	48
3	62	140	83	80	53.5	41.7	54	43.73	377.725	1153.33	604.617	519.197	72	159	94	91	167.16	860.5	253.004	236.328	34	40	38	35
4	83	71	93	90	47.25	52.57	51.29	44.63	566.17	435.958	716.558	672.904	89	80	104	98	461.539	279.97	413.901	452.811	31	24	44	30
5	55	80	122	54	55.71	50.86	45.19	42.98	471.773	697.342	771.497	417.651	61	86	139	64	262.134	680.311	358.642	207.453	28	28	46	34
6	45	79	68	90	51.47	43.73	37.71	39.34	304.22	748.344	504.369	629.873	49	97	82	100	138.763	455.73	302.05	258.336	30	34	40	36
7	58	62	99	83	48.5596	45.7	41.14	40.48	492.598	432.893	622.295	485.385	69	75	113	88	251.947	204.611	243.094	210.069	36	29	42	31
8	59	110	63	88	43.31	40.76	40.09	47.06	500.235	746.562	402.051	517.423	76	119	82	99	300.717	480.554	172.869	200.059	43	28	40	42
9	61	76	92	106	48.27	38.88	35.5379	39.85	452.068	533.732	657.746	777.203	72	85	115	123	241.006	433.696	549.671	320.21	35	25	44	39
10	61	79	95	102	40.32	48.76	36.8055	47.77	482.657	619.939	727.787	817.109	73	84	117	107	230.266	469.084	311.91	486.741	38	30	44	39
11	54	76	114	46	42.99	47.97	44.3084	46.74	444.947	614.966	745.959	408.081	64	88	133	57	237.636	353.561	304.968	233.461	38	31	40	33
12	49	57	190	101	39.46	41.51	53.2003	47.26	353.839	437.5	1382.6	569.116	57	72	224	108	208.661	288.418	438.902	427.81	31	35	72	34
13	73	64	148	111	44.35	56.39	53.9579	52.6228	545.158	478.841	1032.28	797.079	97	72	187	137	309.193	425.546	386.586	317.217	46	27	67	54
14	81	61		152	50.91	37.18		51.7569	541.613	404.664		1138.32	93	69		179	416.291	246.892		482.868	39	29		60
15	58	84		119	50.49	44.16		46.1857	532.442	680.703		911.313	65	104		135	360.629	340.13		385.907	30	37		43
16	71	78		108	42.81	49.43		43.7843	658.878	600.68		814.846	95	94		122	388.774	237.233		257.053	43	44		40
17	86	62		141	39.93	53.14		49.2642	723.282	420.655		911.489	104	70		167	621.405	236.756		273.553	38	36		54
18	89	77		131	38.79	39.45		52.3832	675.059	610.275		869.853	100	94		153	431.029	364.427		280.344	32	34		54
19	113	78			39.75	44.12			964.03	623.682			137	95			594.14	356.555			49	41
20	82	123			41.85	57.1752			568.405	779.2			92	135			282.105	396.672			33	36
21	58	103			55.46	51.0781			645.578	856.233			80	127			427.408	754.232			49	37
22	77	63			38.68	50.8291			601.544	422.41			98	70			428.363	536.869			42	23
23	72	55			45.9067	47.2672			526.982	332.903			86	62			307.257	246.414			39	26
24	64	80			42.4526	42.7338			527.318	571.732			85	93			353.813	352.203			43	34
25	116				48.9829				809.66				138				327.806				51
26	97				49.0084				720.021				114				518.609				44
