# Supplementary material for: Excitatory neurotransmission activates compartmentalized calcium transients in Müller glia without affecting lateral process motility
Source: eLife. 2021 Dec 16;10:e73202. doi: 10.7554/eLife.73202 (PMC8806189; doi:10.7554/eLife.73202)
Supplement: Figure 6—source data 2. [file elife-73202-fig6-data2.xlsx]

## Sheet: Sheet1
	Sholl analysis intersections, XY plane, wild type P12 (Figure 6E)																												Sholl analysis intersections, XY plane, β2-nAChR-KO, P12 (Figure 6E)
	experiment 1												experiment 2										experiment 3						experiment 1												experiment 2							experiment 3
cell #:	1	2	3	4	5	6	7	8	9	10	11	12	1	2	3	4	5	6	7	8	9	10	1	2	3	4		cell #:	1	2	3	4	5	6	7	8	9	10	11	12	1	2	3	4	5	6	7	1	2
radius = 1 μm	6	6	7	6	8	8	10	7	6	11	10	6	6	7	10	5	9	9	5	8	7	9	7	6	9	4		radius = 1 μm	7	7	10	9	8	9	8	4	10	9	7	7	6	7	7	5	10	9	9	9	7
2 μm	16	16	18	18	19	22	21	18	15	21	18	17	18	20	19	17	17	16	16	14	21	19	18	21	20	17		2 μm	12	12	14	15	19	21	17	16	16	15	19	19	12	16	19	15	16	22	19	13	19
3 μm	20	22	19	21	20	22	24	23	23	22	21	19	22	20	23	26	21	20	23	25	26	25	20	24	24	21		3 μm	24	23	21	16	20	20	19	26	26	18	23	24	19	18	26	22	23	28	26	24	20
4 μm	21	25	25	28	25	14	25	21	27	27	20	19	27	24	24	27	29	26	33	27	28	29	24	27	33	21		4 μm	31	21	32	19	31	26	25	26	28	22	32	25	17	20	26	29	25	34	24	29	25
5 μm	20	21	23	25	21	12	23	24	25	26	18	17	26	27	26	33	32	31	31	29	28	31	27	19	27	20		5 μm	30	27	34	28	26	27	18	36	31	35	32	25	22	26	30	30	25	26	30	31	35
6 μm	15	17	15	26	23	10	15	24	26	20	21	13	16	22	26	32	26	28	32	23	21	28	19	21	37	22		6 μm	27	19	40	22	25	28	18	31	27	32	36	28	23	24	27	26	18	23	28	28	33
7 μm	13	12	10	26	18	7	13	15	18	15	11	7	18	18	23	28	29	22	36	21	21	20	17	17	32	18		7 μm	30	21	29	18	24	24	19	36	20	30	23	16	23	14	25	21	15	18	21	24	34
8 μm	8	10	6	21	12	4	9	15	13	14	11	6	18	13	19	23	25	18	29	11	19	16	11	12	25	12		8 μm	28	15	34	16	23	21	7	23	18	22	18	12	17	11	19	10	12	18	18	26	23
9 μm	11	6	0	14	7	2	4	7	8	8	9	4	11	7	15	17	18	15	28	10	15	13	6	8	16	11		9 μm	27	11	21	12	28	21	3	19	14	19	14	5	21	7	18	5	4	14	13	19	22
10 μm	9	5	0	14	4	2	4	5	3	3	3	2	5	4	12	16	15	12	26	10	10	9	7	6	9	14		10 μm	25	9	23	5	16	16	2	16	8	17	8	4	16	3	12	3	1	10	7	14	18
11 μm	6	4	0	9	4	1	4	2	0	1	5	0	5	5	5	14	12	7	19	7	11	8	7	4	5	8		11 μm	16	7	22	2	13	13	0	10	8	14	5	3	13	1	8	1	2	12	7	9	12
12 μm	6	3	0	4	3	0	1	2	0	1	1	0	1	6	3	7	7	7	18	6	7	8	2	5	3	8		12 μm	8	2	14	1	11	9	0	8	7	8	2	1	10	2	6	1	2	5	8	6	9
13 μm	4	2	0	4	2	0	3	2	0	0	0	0	1	5	1	5	7	6	14	2	8	4	2	5	1	7		13 μm	6	0	14	1	13	6	0	7	5	5	2	1	6	0	4	0	0	6	6	4	12
14 μm	3	0	0	2	1	0	1	1	0	0	0	0	1	4	1	1	4	3	8	2	7	4	1	4	0	3		14 μm	6	0	14	0	9	5	0	4	3	2	1	1	6	0	3	0	0	4	2	4	9
15 μm	3	0	0	1	0	0	0	0	0	0	0	0	1	4	0	0	5	2	5	0	4	2	3	5	0	3		15 μm	3	0	10	0	11	4	0	2	3	2	0	1	5	0	1	0	0	2	1	1	5
16 μm	4	0	0	2	0	0	0	0	0	0	0	0	1	2	0	0	2	1	2	0	1	1	0	2	0	2		16 μm	3	0	7	0	10	6	0	2	1	1	0	0	1	0	0	0	0	1	1	0	4
17 μm	3	0	0	2	0	0	0	0	0	0	0	0	1	2	0	0	3	0	1	0	1	1	0	3	0	3		17 μm	3	0	5	0	5	1	0	1	1	1	0	0	0	0	0	0	0	0	1	0	3
18 μm	2	0	0	2	0	0	0	0	0	0	0	0	1	0	0	0	1	0	0	0	1	0	0	1	0	1		18 μm	5	0	2	0	1	1	0	1	0	1	0	0	0	0	0	0	0	0	1	0	2
19 μm	1	0	0	2	0	0	0	0	0	0	0	0	0	0	0	0	2	0	0	0	1	0	0	0	0	1		19 μm	2	0	2	0	0	0	0	0	0	0	0	0	0	0	0	0	0	0	0	0	1
20 μm	1	0	0	1	0	0	0	0	0	0	0	0	0	0	0	0	3	0	0	0	1	0	0	0	0	1		20 μm	2	0	3	0	0	0	0	0	0	0	0	0	0	0	0	0	0	0	0	0	1
21 μm	1	0	0	1	0	0	0	0	0	0	0	0	0	0	0	0	0	0	0	0	0	0	0	0	0	1		21 μm	2	0	2	0	0	0	0	0	0	0	0	0	0	0	0	0	0	0	0	0	1
22 μm	1	0	0	0	0	0	0	0	0	0	0	0	0	0	0	0	0	0	0	0	0	0	0	0	0	1		22 μm	2	0	3	0	0	0	0	0	0	0	0	0	0	0	0	0	0	0	0	0	1
23 μm	1	0	0	0	0	0	0	0	0	0	0	0	0	0	0	0	0	0	0	0	0	0	0	0	0	1		23 μm	1	0	2	0	0	0	0	0	0	0	0	0	0	0	0	0	0	0	0	0	1
24 μm	1	0	0	0	0	0	0	0	0	0	0	0	0	0	0	0	0	0	0	0	0	0	0	0	0	1		24 μm	0	0	0	0	0	0	0	0	0	0	0	0	0	0	0	0	0	0	0	0	1
25 μm	1	0	0	0	0	0	0	0	0	0	0	0	0	0	0	0	0	0	0	0	0	0	0	0	0	1		25 μm	0	0	0	0	0	0	0	0	0	0	0	0	0	0	0	0	0	0	0	0	1
26 μm	1	0	0	0	0	0	0	0	0	0	0	0	0	0	0	0	0	0	0	0	0	0	0	0	0	1		26 μm	0	0	0	0	0	0	0	0	0	0	0	0	0	0	0	0	0	0	0	0	1
27 μm	1	0	0	0	0	0	0	0	0	0	0	0	0	0	0	0	0	0	0	0	0	0	0	0	0	0		27 μm	0	0	0	0	0	0	0	0	0	0	0	0	0	0	0	0	0	0	0	0	0
28 μm	1	0	0	0	0	0	0	0	0	0	0	0	0	0	0	0	0	0	0	0	0	0	0	0	0	0		28 μm	0	0	0	0	0	0	0	0	0	0	0	0	0	0	0	0	0	0	0	0	0
29 μm	1	0	0	0	0	0	0	0	0	0	0	0	0	0	0	0	0	0	0	0	0	0	0	0	0	0		29 μm	0	0	0	0	0	0	0	0	0	0	0	0	0	0	0	0	0	0	0	0	0
30 μm	1	0	0	0	0	0	0	0	0	0	0	0	0	0	0	0	0	0	0	0	0	0	0	0	0	0		30 μm	0	0	0	0	0	0	0	0	0	0	0	0	0	0	0	0	0	0	0	0	0
31 μm	0	0	0	0	0	0	0	0	0	0	0	0	0	0	0	0	0	0	0	0	0	0	0	0	0	0		31 μm	0	0	0	0	0	0	0	0	0	0	0	0	0	0	0	0	0	0	0	0	0
32 μm	0	0	0	0	0	0	0	0	0	0	0	0	0	0	0	0	0	0	0	0	0	0	0	0	0	0		32 μm	0	0	0	0	0	0	0	0	0	0	0	0	0	0	0	0	0	0	0	0	0
33 μm	0	0	0	0	0	0	0	0	0	0	0	0	0	0	0	0	0	0	0	0	0	0	0	0	0	0		33 μm	0	0	0	0	0	0	0	0	0	0	0	0	0	0	0	0	0	0	0	0	0
34 μm	0	0	0	0	0	0	0	0	0	0	0	0	0	0	0	0	0	0	0	0	0	0	0	0	0	0		34 μm	0	0	0	0	0	0	0	0	0	0	0	0	0	0	0	0	0	0	0	0	0
35 μm	0	0	0	0	0	0	0	0	0	0	0	0	0	0	0	0	0	0	0	0	0	0	0	0	0	0		35 μm	0	0	0	0	0	0	0	0	0	0	0	0	0	0	0	0	0	0	0	0	0
36 μm	0	0	0	0	0	0	0	0	0	0	0	0	0	0	0	0	0	0	0	0	0	0	0	0	0	0		36 μm	0	0	0	0	0	0	0	0	0	0	0	0	0	0	0	0	0	0	0	0	0
37 μm	0	0	0	0	0	0	0	0	0	0	0	0	0	0	0	0	0	0	0	0	0	0	0	0	0	0		37 μm	0	0	0	0	0	0	0	0	0	0	0	0	0	0	0	0	0	0	0	0	0
38 μm	0	0	0	0	0	0	0	0	0	0	0	0	0	0	0	0	0	0	0	0	0	0	0	0	0	0		38 μm	0	0	0	0	0	0	0	0	0	0	0	0	0	0	0	0	0	0	0	0	0
39 μm	0	0	0	0	0	0	0	0	0	0	0	0	0	0	0	0	0	0	0	0	0	0	0	0	0	0		39 μm	0	0	0	0	0	0	0	0	0	0	0	0	0	0	0	0	0	0	0	0	0
40 μm	0	0	0	0	0	0	0	0	0	0	0	0	0	0	0	0	0	0	0	0	0	0	0	0	0	0		40 μm	0	0	0	0	0	0	0	0	0	0	0	0	0	0	0	0	0	0	0	0	0
41 μm	0	0	0	0	0	0	0	0	0	0	0	0	0	0	0	0	0	0	0	0	0	0	0	0	0	0		41 μm	0	0	0	0	0	0	0	0	0	0	0	0	0	0	0	0	0	0	0	0	0
42 μm	0	0	0	0	0	0	0	0	0	0	0	0	0	0	0	0	0	0	0	0	0	0	0	0	0	0		42 μm	0	0	0	0	0	0	0	0	0	0	0	0	0	0	0	0	0	0	0	0	0
43 μm	0	0	0	0	0	0	0	0	0	0	0	0	0	0	0	0	0	0	0	0	0	0	0	0	0	0		43 μm	0	0	0	0	0	0	0	0	0	0	0	0	0	0	0	0	0	0	0	0	0
44 μm	0	0	0	0	0	0	0	0	0	0	0	0	0	0	0	0	0	0	0	0	0	0	0	0	0	0		44 μm	0	0	0	0	0	0	0	0	0	0	0	0	0	0	0	0	0	0	0	0	0
45 μm	0	0	0	0	0	0	0	0	0	0	0	0	0	0	0	0	0	0	0	0	0	0	0	0	0	0		45 μm	0	0	0	0	0	0	0	0	0	0	0	0	0	0	0	0	0	0	0	0	0
46 μm	0	0	0	0	0	0	0	0	0	0	0	0	0	0	0	0	0	0	0	0	0	0	0	0	0	0		46 μm	0	0	0	0	0	0	0	0	0	0	0	0	0	0	0	0	0	0	0	0	0
47 μm	0	0	0	0	0	0	0	0	0	0	0	0	0	0	0	0	0	0	0	0	0	0	0	0	0	0		47 μm	0	0	0	0	0	0	0	0	0	0	0	0	0	0	0	0	0	0	0	0	0
48 μm	0	0	0	0	0	0	0	0	0	0	0	0	0	0	0	0	0	0	0	0	0	0	0	0	0	0		48 μm	0	0	0	0	0	0	0	0	0	0	0	0	0	0	0	0	0	0	0	0	0
49 μm	0	0	0	0	0	0	0	0	0	0	0	0	0	0	0	0	0	0	0	0	0	0	0	0	0	0		49 μm	0	0	0	0	0	0	0	0	0	0	0	0	0	0	0	0	0	0	0	0	0
50 μm	0	0	0	0	0	0	0	0	0	0	0	0	0	0	0	0	0	0	0	0	0	0	0	0	0	0		50 μm	0	0	0	0	0	0	0	0	0	0	0	0	0	0	0	0	0	0	0	0	0
51 μm	0	0	0	0	0	0	0	0	0	0	0	0	0	0	0	0	0	0	0	0	0	0	0	0	0	0		51 μm	0	0	0	0	0	0	0	0	0	0	0	0	0	0	0	0	0	0	0	0	0
52 μm	0	0	0	0	0	0	0	0	0	0	0	0	0	0	0	0	0	0	0	0	0	0	0	0	0	0		52 μm	0	0	0	0	0	0	0	0	0	0	0	0	0	0	0	0	0	0	0	0	0
53 μm	0	0	0	0	0	0	0	0	0	0	0	0	0	0	0	0	0	0	0	0	0	0	0	0	0	0		53 μm	0	0	0	0	0	0	0	0	0	0	0	0	0	0	0	0	0	0	0	0	0
54 μm	0	0	0	0	0	0	0	0	0	0	0	0	0	0	0	0	0	0	0	0	0	0	0	0	0	0		54 μm	0	0	0	0	0	0	0	0	0	0	0	0	0	0	0	0	0	0	0	0	0
55 μm	0	0	0	0	0	0	0	0	0	0	0	0	0	0	0	0	0	0	0	0	0	0	0	0	0	0		55 μm	0	0	0	0	0	0	0	0	0	0	0	0	0	0	0	0	0	0	0	0	0
56 μm	0	0	0	0	0	0	0	0	0	0	0	0	0	0	0	0	0	0	0	0	0	0	0	0	0	0		56 μm	0	0	0	0	0	0	0	0	0	0	0	0	0	0	0	0	0	0	0	0	0
57 μm	0	0	0	0	0	0	0	0	0	0	0	0	0	0	0	0	0	0	0	0	0	0	0	0	0	0		57 μm	0	0	0	0	0	0	0	0	0	0	0	0	0	0	0	0	0	0	0	0	0
58 μm	0	0	0	0	0	0	0	0	0	0	0	0	0	0	0	0	0	0	0	0	0	0	0	0	0	0		58 μm	0	0	0	0	0	0	0	0	0	0	0	0	0	0	0	0	0	0	0	0	0
59 μm	0	0	0	0	0	0	0	0	0	0	0	0	0	0	0	0	0	0	0	0	0	0	0	0	0	0		59 μm	0	0	0	0	0	0	0	0	0	0	0	0	0	0	0	0	0	0	0	0	0
60 μm	0	0	0	0	0	0	0	0	0	0	0	0	0	0	0	0	0	0	0	0	0	0	0	0	0	0		60 μm	0	0	0	0	0	0	0	0	0	0	0	0	0	0	0	0	0	0	0	0	0
	Sholl analysis intersections, XY plane, wild type P30+																												Sholl analysis intersections, XY plane, β2-nAChR-KO, P30+
	experiment 1								experiment 2																				experiment 1												experiment 2
cell #:	1	2	3	4	5	6	7	8	1	2	3	4	5															cell #:	1	2	3	4	5	6	7	8	9	10	11	12	1	2	3	4	5	6
radius = 1 μm	8	8	8	5	8	8	6	9	7	6	7	5	5															radius = 1 μm	6	9	7	11	8	10	8	9	11	6	9	6	5	5	8	9	5	4
2 μm	17	18	14	16	18	16	21	16	13	16	19	17	7															2 μm	16	17	18	17	14	16	11	17	20	16	17	13	12	14	18	20	17	14
3 μm	24	14	25	24	20	22	22	23	22	21	24	21	17															3 μm	20	23	22	19	19	16	20	22	22	23	19	26	23	20	23	21	26	18
4 μm	31	26	23	28	30	30	27	24	31	27	29	27	25															4 μm	26	22	29	23	21	21	25	29	30	24	33	29	24	34	31	23	27	28
5 μm	25	24	23	32	33	27	30	19	21	27	29	43	41															5 μm	25	28	22	26	15	25	22	18	25	26	26	24	31	30	29	31	42	29
6 μm	22	20	24	27	33	22	29	15	28	23	25	34	33															6 μm	34	20	20	27	13	15	17	13	22	25	20	23	23	24	26	26	35	35
7 μm	16	22	16	23	24	18	18	8	18	20	19	33	25															7 μm	28	18	14	21	11	16	17	10	23	27	16	19	20	25	29	21	22	21
8 μm	13	15	13	17	18	13	17	8	17	13	24	32	12															8 μm	24	16	7	24	9	14	12	11	22	25	14	14	13	19	22	16	19	10
9 μm	6	10	8	8	13	8	7	1	8	8	16	20	9															9 μm	19	14	3	19	8	8	6	6	17	15	3	15	13	23	16	15	8	6
10 μm	5	7	6	9	10	4	6	1	5	8	13	14	12															10 μm	13	18	3	11	6	8	4	3	10	14	3	9	10	19	12	6	4	3
11 μm	4	5	2	5	6	4	2	1	4	4	9	13	10															11 μm	5	17	2	6	2	12	2	1	5	12	2	8	12	19	8	3	2	3
12 μm	3	3	2	2	4	3	1	1	2	3	3	9	5															12 μm	3	16	2	5	2	7	1	0	1	10	1	6	6	14	6	1	2	2
13 μm	2	2	0	3	2	2	1	0	2	4	2	13	8															13 μm	1	12	1	5	2	5	0	0	1	11	0	3	3	14	6	0	2	1
14 μm	2	1	0	5	2	1	0	0	2	1	0	9	5															14 μm	1	7	1	6	2	1	0	0	0	8	0	3	2	12	2	0	3	1
15 μm	3	1	0	2	1	1	0	0	2	0	0	7	1															15 μm	0	6	0	2	1	0	0	0	0	10	0	2	0	3	3	0	0	0
16 μm	1	0	0	2	1	0	0	0	2	0	0	4	0															16 μm	0	6	0	2	1	0	0	0	0	7	0	1	0	2	0	0	0	0
17 μm	0	0	0	3	1	0	0	0	4	0	0	3	0															17 μm	0	5	0	3	0	0	0	0	0	3	0	0	0	2	0	0	0	0
18 μm	0	0	0	3	1	0	0	0	1	0	0	2	0															18 μm	0	5	0	2	0	0	0	0	0	2	0	0	0	0	0	0	0	0
19 μm	0	0	0	3	2	0	0	0	1	0	0	1	0															19 μm	0	5	0	3	0	0	0	0	0	0	0	0	0	0	0	0	0	0
20 μm	0	0	0	3	2	0	0	0	1	0	0	1	0															20 μm	0	4	0	3	0	0	0	0	0	0	0	0	0	0	0	0	0	0
21 μm	0	0	0	0	0	0	0	0	1	0	0	1	0															21 μm	0	3	0	3	0	0	0	0	0	0	0	0	0	0	0	0	0	0
22 μm	0	0	0	1	0	0	0	0	1	0	0	0	0															22 μm	0	3	0	2	0	0	0	0	0	0	0	0	0	0	0	0	0	0
23 μm	0	0	0	0	0	0	0	0	1	0	0	0	0															23 μm	0	2	0	0	0	0	0	0	0	0	0	0	0	0	0	0	0	0
24 μm	0	0	0	0	0	0	0	0	1	0	0	0	0															24 μm	0	2	0	0	0	0	0	0	0	0	0	0	0	0	0	0	0	0
25 μm	0	0	0	0	0	0	0	0	1	0	0	0	0															25 μm	0	1	0	0	0	0	0	0	0	0	0	0	0	0	0	0	0	0
26 μm	0	0	0	0	0	0	0	0	1	0	0	0	0															26 μm	0	1	0	0	0	0	0	0	0	0	0	0	0	0	0	0	0	0
27 μm	0	0	0	0	0	0	0	0	1	0	0	0	0															27 μm	0	0	0	0	0	0	0	0	0	0	0	0	0	0	0	0	0	0
28 μm	0	0	0	0	0	0	0	0	2	0	0	0	0															28 μm	0	0	0	0	0	0	0	0	0	0	0	0	0	0	0	0	0	0
29 μm	0	0	0	0	0	0	0	0	0	0	0	0	0															29 μm	0	0	0	0	0	0	0	0	0	0	0	0	0	0	0	0	0	0
30 μm	0	0	0	0	0	0	0	0	0	0	0	0	0															30 μm	0	0	0	0	0	0	0	0	0	0	0	0	0	0	0	0	0	0
31 μm	0	0	0	0	0	0	0	0	0	0	0	0	0															31 μm	0	0	0	0	0	0	0	0	0	0	0	0	0	0	0	0	0	0
32 μm	0	0	0	0	0	0	0	0	0	0	0	0	0															32 μm	0	0	0	0	0	0	0	0	0	0	0	0	0	0	0	0	0	0
33 μm	0	0	0	0	0	0	0	0	0	0	0	0	0															33 μm	0	0	0	0	0	0	0	0	0	0	0	0	0	0	0	0	0	0
34 μm	0	0	0	0	0	0	0	0	0	0	0	0	0															34 μm	0	0	0	0	0	0	0	0	0	0	0	0	0	0	0	0	0	0
35 μm	0	0	0	0	0	0	0	0	0	0	0	0	0															35 μm	0	0	0	0	0	0	0	0	0	0	0	0	0	0	0	0	0	0
36 μm	0	0	0	0	0	0	0	0	0	0	0	0	0															36 μm	0	0	0	0	0	0	0	0	0	0	0	0	0	0	0	0	0	0
37 μm	0	0	0	0	0	0	0	0	0	0	0	0	0															37 μm	0	0	0	0	0	0	0	0	0	0	0	0	0	0	0	0	0	0
38 μm	0	0	0	0	0	0	0	0	0	0	0	0	0															38 μm	0	0	0	0	0	0	0	0	0	0	0	0	0	0	0	0	0	0
39 μm	0	0	0	0	0	0	0	0	0	0	0	0	0															39 μm	0	0	0	0	0	0	0	0	0	0	0	0	0	0	0	0	0	0
40 μm	0	0	0	0	0	0	0	0	0	0	0	0	0															40 μm	0	0	0	0	0	0	0	0	0	0	0	0	0	0	0	0	0	0
41 μm	0	0	0	0	0	0	0	0	0	0	0	0	0															41 μm	0	0	0	0	0	0	0	0	0	0	0	0	0	0	0	0	0	0
42 μm	0	0	0	0	0	0	0	0	0	0	0	0	0															42 μm	0	0	0	0	0	0	0	0	0	0	0	0	0	0	0	0	0	0
43 μm	0	0	0	0	0	0	0	0	0	0	0	0	0															43 μm	0	0	0	0	0	0	0	0	0	0	0	0	0	0	0	0	0	0
44 μm	0	0	0	0	0	0	0	0	0	0	0	0	0															44 μm	0	0	0	0	0	0	0	0	0	0	0	0	0	0	0	0	0	0
45 μm	0	0	0	0	0	0	0	0	0	0	0	0	0															45 μm	0	0	0	0	0	0	0	0	0	0	0	0	0	0	0	0	0	0
46 μm	0	0	0	0	0	0	0	0	0	0	0	0	0															46 μm	0	0	0	0	0	0	0	0	0	0	0	0	0	0	0	0	0	0
47 μm	0	0	0	0	0	0	0	0	0	0	0	0	0															47 μm	0	0	0	0	0	0	0	0	0	0	0	0	0	0	0	0	0	0
48 μm	0	0	0	0	0	0	0	0	0	0	0	0	0															48 μm	0	0	0	0	0	0	0	0	0	0	0	0	0	0	0	0	0	0
49 μm	0	0	0	0	0	0	0	0	0	0	0	0	0															49 μm	0	0	0	0	0	0	0	0	0	0	0	0	0	0	0	0	0	0
50 μm	0	0	0	0	0	0	0	0	0	0	0	0	0															50 μm	0	0	0	0	0	0	0	0	0	0	0	0	0	0	0	0	0	0
51 μm	0	0	0	0	0	0	0	0	0	0	0	0	0															51 μm	0	0	0	0	0	0	0	0	0	0	0	0	0	0	0	0	0	0
52 μm	0	0	0	0	0	0	0	0	0	0	0	0	0															52 μm	0	0	0	0	0	0	0	0	0	0	0	0	0	0	0	0	0	0
53 μm	0	0	0	0	0	0	0	0	0	0	0	0	0															53 μm	0	0	0	0	0	0	0	0	0	0	0	0	0	0	0	0	0	0
54 μm	0	0	0	0	0	0	0	0	0	0	0	0	0															54 μm	0	0	0	0	0	0	0	0	0	0	0	0	0	0	0	0	0	0
55 μm	0	0	0	0	0	0	0	0	0	0	0	0	0															55 μm	0	0	0	0	0	0	0	0	0	0	0	0	0	0	0	0	0	0
56 μm	0	0	0	0	0	0	0	0	0	0	0	0	0															56 μm	0	0	0	0	0	0	0	0	0	0	0	0	0	0	0	0	0	0
57 μm	0	0	0	0	0	0	0	0	0	0	0	0	0															57 μm	0	0	0	0	0	0	0	0	0	0	0	0	0	0	0	0	0	0
58 μm	0	0	0	0	0	0	0	0	0	0	0	0	0															58 μm	0	0	0	0	0	0	0	0	0	0	0	0	0	0	0	0	0	0
59 μm	0	0	0	0	0	0	0	0	0	0	0	0	0															59 μm	0	0	0	0	0	0	0	0	0	0	0	0	0	0	0	0	0	0
60 μm	0	0	0	0	0	0	0	0	0	0	0	0	0															60 μm	0	0	0	0	0	0	0	0	0	0	0	0	0	0	0	0	0	0
[truncated: 125 more columns]
