# Supplementary material for: Excitatory neurotransmission activates compartmentalized calcium transients in Müller glia without affecting lateral process motility
Source: eLife. 2021 Dec 16;10:e73202. doi: 10.7554/eLife.73202 (PMC8806189; doi:10.7554/eLife.73202)
Supplement: Supplementary file 1. [file elife-73202-supp1.xlsx]

## Sheet: Sheet1
Supplementary file 1. Analysis of differences in lateral process outgrowth between sublayers; separate tests for each age group.
		P8-9	P10-P11	P12-P17	P20+
n (processes; cells; animals)		1895; 32; 6	1822; 24; 5	2546; 30; 6	970; 18; 5
Chi-square value (goodness-of-fit)		404.53	137.36	127.4	58.67
p-value from goodness-of-fit test		1.17 x 10-85	2.07 x 10-28	1.87 x 10-26	5.5 x 10-12
Average ± SEM proportion processes in each sublayer; residual difference from uniform distribution	S1	0.23 ± 0.04; 0.87	0.21 ± 0.04; 0.45	0.21 ± 0.04; 1.68	0.22 ± 0.04; 1.15
	S2	0.07 ± 0.01;	0.12 ± 0.03;	0.14 ± 0.03;	0.11 ± 0.02;
		-12.58	-7.04	-6.35	-4.67
	S3	0.13 ± 0.02;	0.19 ± 0.04;	0.20 ± 0.04;	0.21 ± 0.04;
		-5.29	-0.7	-1.29	0.43
	S4	0.21 ± 0.04; 2.47	0.18 ± 0.04; -1.85	0.18 ± 0.03;	0.17 ± 0.03;
				-2.71	-2.37
	S5	0.36 ± 0.06 14.54	0.30 ± 0.06;	0.28 ± 0.05; 8.68	0.28 ± 0.06;
			9.15		5.46
Chi-square goodness-of-fit tests were used to test for nonuniform distribution of processes across the IPL at each age. p-values were corrected using Benjamini-Hochberg adjustment. Related to Figure 1D. Source data available in Figure 1-source data 1.
