# Supplementary material for: Excitatory neurotransmission activates compartmentalized calcium transients in Müller glia without affecting lateral process motility
Source: eLife. 2021 Dec 16;10:e73202. doi: 10.7554/eLife.73202 (PMC8806189; doi:10.7554/eLife.73202)
Supplement: Supplementary file 2. [file elife-73202-supp2.xlsx]

## Sheet: Sheet1
Supplementary file 2. Analysis of age-dependent differences in lateral process outgrowth within each sublayer
Chi-square value (independent proportions)				112.51
Overall p-value				1.90 x 10-18
n same as in Table 1				P8-9	P10-P11	P12-P17	P20+
Statistics from post hoc comparisons between ages; separate comparisons for each sublayer	S1	X2 = 0.88	p = 0.83	-0.19	-0.58	0.43	0.37
	S2	X2 = 59.85	p = 3.1 x 10-12	-6.07	0.93	3.66	1.29
	S3	X2 = 22.79	p = 5.6 x 10-5	-3.59	1.2	0.93	1.87
	S4	X2 = 23.36	p = 5.6 x 10-5	3.67	-0.8	-1.48	-1.63
	S5	X2 = 30.68	p = 2.4 x 10-6	3.85	-0.39	-2.2	-1.28
Following an overall Chi-square test for independent proportions across ages, separate Chi-square tests for independent proportions were performed for each sublayer to test for sublayer-specific developmental changes in process outgrowth. p-values were corrected using Benjamini-Hochberg adjustment. Residual differences in proportions across ages are reported for each Chi-square test. Related to F…
