# Supplementary material for: Excitatory neurotransmission activates compartmentalized calcium transients in Müller glia without affecting lateral process motility
Source: eLife. 2021 Dec 16;10:e73202. doi: 10.7554/eLife.73202 (PMC8806189; doi:10.7554/eLife.73202)
Supplement: Supplementary file 3. [file elife-73202-supp3.xlsx]

## Sheet: Sheet1
Supplementary file 3. Analysis of age-dependent differences in proportion stable processes
Overall statistics: Kruskal-Wallis rank sum test	overall X2 = 77.72;	Median [1st quartile/3rd quartile] proportion stable processes for each age
	p = 1.41 x 10-13
	n (processes; cells; animals)	P8/9	P10/11	P12/13	P14	P16	P17	P20	P23/24	P40+
		0.10 [0.075/0.15]	0.19 [0.13/0.22]	0.18 [0.14/0.20]	0.28 [0.24/0.31]	0.42 [0.40/0.50]	0.82 [0.74/0.87]	0.86 [0.84/0.87]	0.74 [0.65/0.83]	0.86 [0.83/0.90]
P8/9	240; 32; 6	Wilcoxon rank sum p-values from pairwise comparisons
P10/11	319; 24; 5	0.003
P12/13	207; 12; 3	0.0027	0.8
P14	148; 6; 1	0.00075	0.0036	0.0016
P16	182; 6; 1	0.00036	3.0 x 10-5	3.7 x 10-4	0.003
P17	245; 6; 1	0.0003	3.0 x 10-5	3.7 x 10-4	0.003	0.003
P20	233; 6; 1	0.00036	3.0 x 10-5	3.7 x 10-4	0.003	0.003	0.34
P23/24	337; 8; 2	9.7 x 10-5	6.9 x 10-6	9.7 x 10-5	0.0015	0.0015	0.26	0.05
P40+	212; 4; 2	2.6 x 10-3	3.7 x 10-4	2.2 x 10-3	0.012	0.012	0.5	0.91	0.084
Following overall Kruskal Wallis rank sum test for age-dependent changes in proportion of total stable processes, separate pairwise Wilcoxon rank sum tests were performed to determine developmental time course of process stabilization. Reported p-values are false discovery rate-corrected. Related to Fig. 1F. Source data available in Figure 1-source data 1.
