# Supplementary material for: Excitatory neurotransmission activates compartmentalized calcium transients in Müller glia without affecting lateral process motility
Source: eLife. 2021 Dec 16;10:e73202. doi: 10.7554/eLife.73202 (PMC8806189; doi:10.7554/eLife.73202)
Supplement: Supplementary file 4. [file elife-73202-supp4.xlsx]

## Sheet: Sheet1
Supplementary file 4. Analysis of motility in blockers of cytoskeletal rearrangements
Drug		Cytochalasin-D vs. ACSF	Nocodazole vs. ACSF	Cytochalasin-D + nocodazole vs. ACSF
n (processes; cells)		474; 7	208; 3	161; 3
Statistics (Chi-square test for independent proportions)		overall X2 = 444.36; p = 8.0 x 10-93	overall X2 = 98.10;	overall X2 = 356.06;
			p = 6.3 x 10-19	p = 7.7 x 10-74
Chi-square statistics by motility category	Extension	X2 = 25.66;	X2 = 2.10;	X2 = 29.56;
		p = 7.09 x 10-7	p = 0.17	p = 1.3 x 10-7
	New process	X2 = 20.54;	X2 = 5.52;	X2 = 10.83;
		p = 6.8 x 10-6	p = 0.033	p = 0.0014
	Retraction	X2 = 67.21;	X2 = 10.15;	X2 = 45.98;
		p = 8.5 x 10-16	p = 0.0051	p = 4.2 x 10-11
	Lost process	X2 = 22.89;	X2 = 4.71;	X2 = 8.80;
		p = 2.4 x 10-6	p = 0.042	p = 0.0035
	Extension -> retraction	X2 = 62.41;	X2 = 6.66;	X2 = 27.48;
		p = 6.5 x 10-15	p = 0.023	p = 2.8 x 10-7
	Retraction -> extension	X2 = 2.9197;	X2 = 0.49329;	X2 = 2.14;
		p = 0.088	p = 0.48	p = 0.14
	Stable	X2 = 431.2;	X2 = 92.86;	X2 = 352.17;
		p = 6.25-95	p = 3.9 x 10-21	p = 1.0 x 10-77
Statistics for proportion stable processes (median [1st quartile/3rd quartile]; Wilcoxon rank sum p-value)		ACSF: 0.22 [0.17/0.23]	noco.: 0.50 [0.46/0.60]	Cyto+noco: 0.94 [0.93/0.97]
		cyto.: 0.77 [0.75/0.79 ]	p = 0.0088	p = 0.0088
		p = 0.00024
Chi-square tests for independent proportions were used to test for changes in motility in presence of Cytochalasin-D and nocodazole. Controls were in ACSF (n = 967 processes; 12 cells). Post hoc Chi-square tests were used to test for differences in proportions of processes undergoing each type of motility in control vs. drug. Pairwise comparison of proportion stable processes was performed using …
