# Supplementary material for: Excitatory neurotransmission activates compartmentalized calcium transients in Müller glia without affecting lateral process motility
Source: eLife. 2021 Dec 16;10:e73202. doi: 10.7554/eLife.73202 (PMC8806189; doi:10.7554/eLife.73202)
Supplement: Supplementary file 5. [file elife-73202-supp5.xlsx]

## Sheet: Sheet1
Supplementary file 5. Analysis of motility in exogenous EGF
Age		P8/9	P17
n (cells; processes)		ACSF: 7; 553; EGF: 7; 623	ACSF: 6; 306; EGF: 6; 325
Statistics		overall X2 = 64.06; p = 6.7 x 10-12	Fisher's exact p = 0.76
Chi-square statistics by motility category	Extension	X2 = 3.78; p =0.12	Fisher's exact p = 0.90
	New process	X2 = 0.0013; p = 0.97	Fisher's exact p = 1
	Retraction	X2 = 0.91; p = 0.60	Fisher's exact p = 0.20
	Lost process	X2 = 0.61; p = 0.61	Fisher's exact p = 1
	Extension -> retraction	X2 = 7.74; p = 0.019	Fisher's exact p = 0.73
	Retraction -> extension	X2 = 0.32; p = 0.67	Fisher's exact p = 1
	Stable	X2 = 57.33; p = 2.6 x 10-13	Fisher's exact p = 0.50
Statistics for proportion stable processes (median [1st quartile/3rd quartile]; Wilcoxon signed rank p-value)		ACSF: 0.16 [0.15/0.20]	ACSF: 0.82 [0.74/0.87]
		EGF: 0.033 [0.027/0.056]	EGF: 0.78 [0.74/0.83]
		p = 0.031	p = 0.063
Chi-square tests for independent proportions were used to test for changes in overall process motility in the presence of exogenous EGF. Post hoc Chi-square tests were used to test for differences in proportions of processes undergoing each type of motility in control vs. EGF. Pairwise comparison of proportion stable processes was performed using Wilcoxon signed rank test. p-values were corrected…
