# Supplementary material for: Excitatory neurotransmission activates compartmentalized calcium transients in Müller glia without affecting lateral process motility
Source: eLife. 2021 Dec 16;10:e73202. doi: 10.7554/eLife.73202 (PMC8806189; doi:10.7554/eLife.73202)
Supplement: Supplementary file 6. [file elife-73202-supp6.xlsx]

## Sheet: Sheet1
Supplementary file 6. Analysis of calcium compartmentalization: proportion of ROIs participating in waves
Age	P9/10	P11/12
n (waves; FOVs; animals)	130 waves; 19 FOVs; 8 animals	182 waves; 17 FOVs; 5 animals	Pairwise comparison across ages (unpaired t-test)
Stalks	0.141 ± 0.012	0.065 ± 0.002	p = 2.8 x 10-8
LPs	0.175 ± 0.012	0.148 ± 0.007	p = 0.051
Pairwise comparison across compartments (paired t-test)	p = 7.0 x 10-8	p = 7.7 x 10-30
Two-way mixed ANOVA (within group: compartment) revealed significant main effects of age (p = 7.2 x 10-6) and compartment (p = 9.6 x 10-33), with a significant interaction between these factors (p = 7.6 x 10-8). Unpaired t-tests were used to compare proportion ROIs responding between ages, and paired t-tests were used to compare proportion responding between stalks and LPs within ages. Related to…
