# Supplementary material for: Excitatory neurotransmission activates compartmentalized calcium transients in Müller glia without affecting lateral process motility
Source: eLife. 2021 Dec 16;10:e73202. doi: 10.7554/eLife.73202 (PMC8806189; doi:10.7554/eLife.73202)
Supplement: Supplementary file 7. [file elife-73202-supp7.xlsx]

## Sheet: Sheet1
Supplementary file 7. Analysis of intercompartment latency in ACSF
Age	P9/10	P11/12
n wave-assoc. stalk transients	1424	158	Wilcoxon rank sum p-value
Inter-compartment latency (s)	0.17 [0.0/0.68]	0.0 [0.0/0.34]	p = 6.4 x 10-5
Wilcoxon signed rank p-value (BH corrected)	p = 1.45 x 10-49	p = 0.20
Inter-compartment latency was calculated by subtracting the median wave-associated transient time among LPs during a retinal wave from individual wave-associated transient times among stalks responding to that wave. Wilcoxon signed rank tests were used to test for a non-zero latency at each age, and rank sum test was used to test for an age-dependent change in latency. Intercompartment latency is…
