# Supplementary material for: Excitatory neurotransmission activates compartmentalized calcium transients in Müller glia without affecting lateral process motility
Source: eLife. 2021 Dec 16;10:e73202. doi: 10.7554/eLife.73202 (PMC8806189; doi:10.7554/eLife.73202)
Supplement: Supplementary file 8. [file elife-73202-supp8.xlsx]

## Sheet: Sheet1
Supplementary file 8. Proportion of total ROIs participating in retinal waves: ACSF vs. pirenzepine
Age	P9/10 (4 animals)	P11/12 (3 animals)
n (waves; FOVs)	ACSF: 56 waves; 8 FOVs	ACSF: 138 waves; 9 FOVs
	pirenzepine: 56 waves; 10 FOVs	pirenzepine: 218 waves; 9 FOVs
ACSF	stalks: 0.214 ± 0.022	stalks: 0.059 ± 0.003
	LPs: 0.243 ± 0.020	LPs: 0.117 ± 0.009
Pirenzepine	stalks: 0.086 ± 0.008	stalks: 0.050 ± 0.002
	LPs: 0.148 ± 0.016	LPs: 0.099 ± 0.005
Pairwise comparison across conditions (two-sample t-test, p-value BH corrected)	Stalks: p = 2.5 x 10-6	Stalks: p = 0.013
	LPs: p = 5.8 x 10-4	LPs: p = 0.068
Three-way mixed ANOVA (within group: compartment) revealed significant main effects of drug (p = 2.7 x 10-13), age (p = 2.7 x 10-13), and compartment (p = 2.7 x 10-13) on proportion ROIs participating in waves, with a significant interaction between drug condition and age (p = 5.88 x 10-9). Two-sample t-tests were used for post hoc analysis of pirenzepine effect on proportion ROIs participating w…
