# Supplementary material for: Excitatory neurotransmission activates compartmentalized calcium transients in Müller glia without affecting lateral process motility
Source: eLife. 2021 Dec 16;10:e73202. doi: 10.7554/eLife.73202 (PMC8806189; doi:10.7554/eLife.73202)
Supplement: Supplementary file 9. [file elife-73202-supp9.xlsx]

## Sheet: Sheet1
Supplementary file 9. Fold change in proportion ROIs participating in retinal waves: ACSF vs. pirenzepine
Age (n paired FOVs)	P9/10 (6 FOVs)	P11/12 (6 FOVs)	Pairwise comparison across ages (unpaired t test)
stalks	0.475 ± 0.046	0.888 ± 0.078	p = 0.0036
LPs	0.677 ± 0.071	0.930 ± 0.070	p = 0.030
Pairwise comparison across compartments (paired t-test, p-value BH corrected)	p = 0.033	p = 0.54
Two-way mixed ANOVA (within group: compartment) revealed significant main effects of age (p = 0.003) and compartment (p = 0.017) on fold change in proportion ROIs participating in waves during pirenzepine application. Paired t-tests were used for post hoc comparison of pirenzepine effect between stalks and LPs, and unpaired t-tests were used to compare pirenzepine effect between ages. Related to …
