# Supplementary material for: Excitatory neurotransmission activates compartmentalized calcium transients in Müller glia without affecting lateral process motility
Source: eLife. 2021 Dec 16;10:e73202. doi: 10.7554/eLife.73202 (PMC8806189; doi:10.7554/eLife.73202)
Supplement: Supplementary file 10. [file elife-73202-supp10.xlsx]

## Sheet: Sheet1
Supplementary file 10. Z scored wave-associated ΔF/F amplitude: ACSF vs. pirenzepine
Age	P9/10	P11/12
n (wave-assoc. transients)	ACSF: 4938 stalk; 4181 LP	ACSF: 3128 stalk; 5292 LP
	pirenzepine: 2137 stalk; 2708 LP	pirenzepine: 3205 stalk; 5788 LP
ACSF	stalks: 5.14 ± 0.03; LPs: 4.30 ± 0.02	stalks: 3.84 ± 0.02; LPs: 3.96 ± 0.01
Pirenzepine	stalks: 4.01 ± 0.03; LPs: 4.08 ± 0.02	stalks: 3.76 ± 0.02; LPs: 3.81 ± 0.01
Pairwise comparison across conditions (unpaired t test, p-value BH corrected)	stalks p = 2.9 x 10-141	stalks p = 0.0043
	LPs p = 6.4 x 10-13	LPs p = 1.9 x 10-15
Three-way repeated measures ANOVA revealed significant main effects of drug (p = 2.3 x 10-127), age (p = 2.1 x 10-20), and compartment (p = 1.7 x 10-234) on wave-associated transient amplitude, with significant interactions between drug:age (p = 2.2 x 10-37), drug:compartment (p = 6.6 x 10-65), and age:compartment (p = 1.4 x 10-47). Two-sample t-tests were used for post hoc analysis of pirenzepin…
