# Supplementary material for: Excitatory neurotransmission activates compartmentalized calcium transients in Müller glia without affecting lateral process motility
Source: eLife. 2021 Dec 16;10:e73202. doi: 10.7554/eLife.73202 (PMC8806189; doi:10.7554/eLife.73202)
Supplement: Supplementary file 11. [file elife-73202-supp11.xlsx]

## Sheet: Sheet1
Supplementary file 11. Fold change in wave-associated ΔF/F amplitude: ACSF vs. pirenzepine
Age	P9/10 (6 FOVs)	P11/12 (6 FOVs)	Pairwise comparison across ages (unpaired t-test, p-value BH corrected)
stalks	0.819 ± 0.031	0.982 ± 0.009	p = 0.0046
LPs	0.945 ± 0.026	0.970 ± 0.017	p = 0.45
Pairwise comparison across compartments (paired t-test, p-value BH corrected)	p = 0.057	p = 0.31
Two-way mixed ANOVA (within group: compartment) revealed significant main effects of age (p = 0.003) and compartment (p = 0.023) on fold change in wave-associated transient amplitude during pirenzepine application, with a significant interaction between age and compartment (p = 0.009). Paired t-tests were used for post hoc comparison of pirenzepine effect between stalks and LPs, and unpaired t-te…
