# Supplementary material for: Excitatory neurotransmission activates compartmentalized calcium transients in Müller glia without affecting lateral process motility
Source: eLife. 2021 Dec 16;10:e73202. doi: 10.7554/eLife.73202 (PMC8806189; doi:10.7554/eLife.73202)
Supplement: Supplementary file 12. [file elife-73202-supp12.xlsx]

## Sheet: Sheet1
Supplementary file 12. Intercompartment latency in ACSF vs. pirenzepine
Age	P9/10	P11/12
n wave-assoc. stalk transients	ACSF: 1141	ACSF: 79	Pairwise comparison across age (Wilcoxon rank sum)
	pirenzepine: 133	pirenzepine: 46
ACSF latency; signed rank p-value	0.34 [0.0/0.68]	0.0 [0.0/0.34]	p = 0.018
	p = 4.4 x 10-44	p = 0.093
Pirenzepine latency; signed rank p-value	0.0 [-0.34/0.68]	0.0 [0.0/0.34]	p = 0.93
	p = 0.093	p = 0.46
Pairwise comparison across conditions (Wilcoxon rank sum p-value)	p = 0.013	p = 0.75
Wilcoxon signed rank tests were used to test for a non-zero latency within each condition and age, and rank sum tests were used to test for effects of pirenzepine and age on latency. Intercompartment latency is reported as median [1st quartile/3rd quartile]. Related to Fig. 3D. Source data available in Figure 3-source data 1.
