# Supplementary material for: Excitatory neurotransmission activates compartmentalized calcium transients in Müller glia without affecting lateral process motility
Source: eLife. 2021 Dec 16;10:e73202. doi: 10.7554/eLife.73202 (PMC8806189; doi:10.7554/eLife.73202)
Supplement: Supplementary file 13. [file elife-73202-supp13.xlsx]

## Sheet: Sheet1
Supplementary file 13. Wave properties in ACSF vs. pirenzepine
	EPSC magnitude	IWI
ACSF	172.41 +/- 30.25 pA	55.12 +/- 6.77 sec
pirenzepine	163.63 +/- 33.44 pA	71.47 +/- 11.55 sec
paired t-test p-value	p = 0.36	p =0.056
Wave properties are averages per RGC voltage clamp recording (n = 13 cells). Wave-associated EPSC and inter-wave interval (IWI) were compared using paired t-tests. Related to Fig. 3E. Source data available in Figure 3-source data 1.
