# Supplementary material for: Excitatory neurotransmission activates compartmentalized calcium transients in Müller glia without affecting lateral process motility
Source: eLife. 2021 Dec 16;10:e73202. doi: 10.7554/eLife.73202 (PMC8806189; doi:10.7554/eLife.73202)
Supplement: Supplementary file 14. [file elife-73202-supp14.xlsx]

## Sheet: Sheet1
Supplementary file 14. Proportion ROIs participating in retinal waves in ACSF, gabazine, and gabazine + pirenzepine
Age	P9/10	P11/12
n (waves; FOVs)	ACSF: 97 waves; 9 FOVs	ACSF: 76 waves; 6 FOVs
	gbz: 98 waves; 9 FOVs	gbz: 76 waves; 6 FOVs
	gbz+pir: 54 waves; 7 FOVs	gbz+pir: 55 waves; 6 FOVs
ACSF	stalks: 0.046 ± 0.003	stalks: 0.058 ± 0.003
	LPs: 0.076 ± 0.005	LPs: 0.148 ± .015
gabazine	stalks: 0.247 ± 0.015	stalks: 0.183 ± 0.017
	LPs: 0.202 ± 0.018	LPs: 0.357 ± 0.026
gabazine + pirenzepine	stalks: 0.073 ± 0.008	stalks: 0.085 ± 0.006
	LPs: 0.159 ± 0.019	LPs: 0.304 ± 0.022
Pairwise comparison: ACSF vs. gbz	stalks p = 3.3 x 10-23	stalks p = 9.7 x 10-10
	LPs p = 2.9 x 10-9	LPs p = 8 x 10-10
Pairwise comparison: gbz vs. gbz+pir	stalks p = 1.5 x 10-18	stalks p = 6.8 x 10-7
	LPs p = 0.12	LPs p = 0.12
Three-way mixed ANOVA (within group: compartment) revealed significant main effects of drug (p = 6.55 x 10-32), age (p = 1.4 x 10-6), and compartment (p = 1.8 x 10-50) on proportion ROIs participating in waves, with significant interactions between drug:compartment (p = 9.59 x 10-12), and age:compartment (p = 1.6 x 10-31). Two-sample t-tests were used for post hoc analysis of gabazine and pirenze…
