# Supplementary material for: Excitatory neurotransmission activates compartmentalized calcium transients in Müller glia without affecting lateral process motility
Source: eLife. 2021 Dec 16;10:e73202. doi: 10.7554/eLife.73202 (PMC8806189; doi:10.7554/eLife.73202)
Supplement: Supplementary file 15. [file elife-73202-supp15.xlsx]

## Sheet: Sheet1
Supplementary file 15. Fold change in proportion ROIs participating in waves in ACSF vs. gabazine, and in gabazine vs. gabazine + pirenzepine
Age	P9/10 (9 FOVs)	P11/12 (6 FOVs)	Pairwise comparison across ages (unpaired t-test)
stalks (ACSF to gbz)	6.97 ± 1.11	5.78 ± 1.74	p = 0.748
LPs (ACSF to gbz)	3.47 ± 0.82	3.87 ± 0.904	p = 0.748
Pairwise comparison across compartments (paired t-test)	p = 0.00118	p = 0.119
stalks (gbz to gbz+pir)	0.291 ± 0.042	0.456 ± 0.063	p = 0.11
LPs (gbz to gbz+pir)	0.646 ± 0.052	0.762 ± 0.061	p = 0.18
Pairwise comparison across compartments (paired t-test)	p = 0.0013	p = 0.021
Two-way mixed ANOVA (within group: compartment) revealed significant effects of compartment (p = 0.00037 for ACSF to gabazine; p = 5.12 x 10-5 for gabazine to gabazine + pirenzepine), and of age (p = 0.03 for gabazine to gabazine + pirenzepine) on fold change in proportion ROIs participating in waves. Paired t-tests were used for post hoc comparison of gabazine and pirenzepine effect between stal…
