# Supplementary material for: Excitatory neurotransmission activates compartmentalized calcium transients in Müller glia without affecting lateral process motility
Source: eLife. 2021 Dec 16;10:e73202. doi: 10.7554/eLife.73202 (PMC8806189; doi:10.7554/eLife.73202)
Supplement: Supplementary file 16. [file elife-73202-supp16.xlsx]

## Sheet: Sheet1
Supplementary file 16. Z scored wave-associated ΔF/F amplitude in ACSF, gabazine, and gabazine + pirenzepine
Age	P9/10	P11/12
n (wave-assoc. transients)	ACSF: 1537 stalk; 2339 LP	ACSF: 1460 stalk; 3022 LP
	gbz: 6814 stalk; 5266 LP	gbz: 4734 stalk; 8160 LP
	gbz+pir: 1149 stalk; 2299 LP	gbz+pir: 1585 stalk; 4687 LP
ACSF	stalks: 3.72 ± 0.031; LPs: 3.79 ± 0.023	stalks: 3.78 ± 0.034; LPs: 3.97 ± 0.018
gabazine	stalks: 6.71 ± 0.04; LPs: 4.37 ± 0.023	stalks: 5.66 ± 0.04; LPs: 4.23 ± 0.013
gbz + pirenzepine	stalks: 3.80 ± 0.03; LPs: 3.92 ± 0.02	stalks: 3.77 ± 0.037; LPs: 4.16 ± 0.02
Pairwise comparison: ACSF vs. gbz	stalks p <0.00001;	stalks p = 1.28 x 10-252
	LPs p = 1.32 x 10-71	LPs p = 1.41 x 10-31
Pairwise comparison: gbz vs. gbz+pir	stalks p < 0.00001;	stalks p = 2.1 x 10-236
	LPs p = 1.4 x 10-5	LPs p = 2.5 x 10-4
Three-way repeated measures ANOVA revealed significant main effects of drug (p < 0.00001), age (p = 2.2 x 10-109), and compartment (p = 7.3 x 10-8) on wave-associated transient amplitude, with significant interactions between drug:age (p < 0.00001), drug:compartment (p = 3.0 x 10-67), and age:compartment (p = 2.5 x 10-22). Two-sample t-tests were used for post hoc analysis of gabazine and pirenze…
