# Supplementary material for: Excitatory neurotransmission activates compartmentalized calcium transients in Müller glia without affecting lateral process motility
Source: eLife. 2021 Dec 16;10:e73202. doi: 10.7554/eLife.73202 (PMC8806189; doi:10.7554/eLife.73202)
Supplement: Supplementary file 17. [file elife-73202-supp17.xlsx]

## Sheet: Sheet1
Supplementary file 17. Fold change in wave-associated transient amplitude: ACSF vs. gabazine; gabazine vs. gabazine + pirenzepine
Age	P9/10 (9 FOVs)	P11/12 (6 FOVs)	Pairwise comparison across ages (unpaired t-test)
stalks (ACSF to gbz)	1.95 ± 0.10	1.46 ± 0.09	p = 0.0054
LPs (ACSF to gbz)	1.20 ± 0.09	1.07 ± 0.04	p = 0.22
Pairwise comparison across compartments (paired t-test)	p = 0.000087	p = 0.0099
stalks (gbz to gbz+pir)	0.543 ± 0.022	0.713 ± 0.065	p = 0.094
LPs (gbz to gbz+pir)	0.899 ± 0.046	0.975 ± 0.016	p = 0.16
Pairwise comparison across compartments (paired t-test)	p = 0.00011	p = 0.0081
Two-way mixed ANOVA (within group: compartment) revealed significant main effects of age (p = 0.014) and compartment (p = 1.8 x 10-6) on fold change in wave-associated transient amplitude during gabazine and pirenzepine application, with a significant interaction between age and compartment (p = 0.024). Paired t-tests were used for post hoc comparison of gabazine and pirenzepine effects between s…
