# Supplementary material for: Excitatory neurotransmission activates compartmentalized calcium transients in Müller glia without affecting lateral process motility
Source: eLife. 2021 Dec 16;10:e73202. doi: 10.7554/eLife.73202 (PMC8806189; doi:10.7554/eLife.73202)
Supplement: Supplementary file 18. [file elife-73202-supp18.xlsx]

## Sheet: Sheet1
Supplementary file 18. Intercompartment latency in ACSF, gabazine, and gabazine + pirenzepine
	ACSF (79 responses, 5 FOVs)	Gabazine (3200 responses, 18 FOVs)	Gabazine + pirenzepine (75 responses, 12 FOVs)	Kruskal-Wallis test result
Intercompartment latency (sec)	1.01 [0.17/1.69]	1.18 [0.34/1.69]	0.34 [0.0/1.01]	X2 = 26.05
				p = 2.2 x 10-6
Pairwise comparison across conditions (Wilcoxon rank sum)	vs gabazine:	vs gbz + pir:	vs. ACSF:
	p = 0.33	p = 1.4 x 10-6	p = 0.0075
Kruskal-Wallis test was used to test for overall drug effect on intercompartment latency between all conditions, with pairwise post hoc tests performed using Wilcoxon rank sum. Intercompartment latency is reported as median [1st quartile/3rd quartile]. Related to Fig 4D. Source data available in Figure 4-source data 1.
