# Supplementary material for: Excitatory neurotransmission activates compartmentalized calcium transients in Müller glia without affecting lateral process motility
Source: eLife. 2021 Dec 16;10:e73202. doi: 10.7554/eLife.73202 (PMC8806189; doi:10.7554/eLife.73202)
Supplement: Supplementary file 19. [file elife-73202-supp19.xlsx]

## Sheet: Sheet1
Supplementary file 19. Wave properties in ACSF, gabazine, and gabazine + pirenzepine
	EPSC magnitude	IWI
ACSF	200.22 ± 52.47 pA	64.10 ± 11.48 sec
gabazine	432.18 ± 142.66 pA	88.48 ± 21.20 sec
gbz + pirenzepine	439.84 ± 157.96 pA	97.73 ± 17.71 sec
one-way ANOVA results	F = 4.69; p = 0.11	F = 2.82; p = 0.086
Wave properties are averages per RGC voltage clamp recording (n = 10 cells). Wave-associated EPSC and inter-wave interval (IWI) were compared using one-way ANOVA. Related to Fig. 4E. Source data available in Figure 4-source data 1.
