# Supplementary material for: Excitatory neurotransmission activates compartmentalized calcium transients in Müller glia without affecting lateral process motility
Source: eLife. 2021 Dec 16;10:e73202. doi: 10.7554/eLife.73202 (PMC8806189; doi:10.7554/eLife.73202)
Supplement: Supplementary file 20. [file elife-73202-supp20.xlsx]

## Sheet: Sheet1
Supplementary file 20. Comparisons of proportion stable processes across conditions
	Control; median [1st quartile/3rd quartile] (n cells; processes)	Drug; median/1st quartile/3rd quartile (n cells; processes)	Chi-square statistics for stable processes	p-value for proportion stable in control vs. drug (Wilcoxon signed rank for paired cells; rank sum for unpaired cells)
Gabazine	0.079 [0.044/0.11]	0.083 [0.077/0.12]	X2 = 0.53	p = 0.38
	(7, 301)	(7, 388)	p = 0.47
Pirenzepine	0.12 [0.081/0.25]	0.17 [0.11/0.19]	X2 = 0.72	p = 0.22
	(14, 945)	(14; 928)	p = 0.39
TBOA	0.10 [0.074/0.16]	0.12 [0.075/0.19]	X2 = 0.21	p = 0.30
	(7, 506)	(7, 532)	p = 0.64
DNQX + AP5	0.11 [0.079/0.25]	0.17 [0.11/0.20]	X2 = 3.2	p = 0.19
	(13, 953)	(13; 905)	p = 0.074
local carbachol	0.10 [0.082/0.14]	0.13 [0.068/0.18]	X2 = 3.86	p = 0.35
	(16, 1258)	(16, 1133)	p = 0.05
local glutamate	P9: 0.15 [0.12/0.17] (2; 183)	P9: 0.14 [0.12/0.15] (2; 171)	P9: X2 = 2.7 x 10-30	p (P9) = 1
	P24: 0.76 [0.71/0.81]	P24: 0.70 [0.70/0.70]	p = 1	p (P24) = 1
	(2; 56)	(2; 76)	P24: X2 = 0.49	p (combined) = 0.88
			p = 0.48
BAPTA	0.20 [0.19/0.22]	0.20 [0.18/0.29]	X2 = 0.12;	p = 0.93
	(5; 335)	6; 408	p = 0.73
Chi-square tests were used to test for differences in proportions of stable processes in control vs. drug using pooled count data. Pairwise comparison of proportion stable processes was performed using Wilcoxon signed rank test for paired cells and ranks sum test for unpaired cells. Related to Fig. 5F. Source data available in Figure 5-source data 1.
