# Supplementary material for: Excitatory neurotransmission activates compartmentalized calcium transients in Müller glia without affecting lateral process motility
Source: eLife. 2021 Dec 16;10:e73202. doi: 10.7554/eLife.73202 (PMC8806189; doi:10.7554/eLife.73202)
Supplement: Supplementary file 21. [file elife-73202-supp21.xlsx]

## Sheet: Sheet1
Supplementary file 21. Comparisons of morphological properties between wild type and β2-nAChR-KO Müller glia
Age	P12/13			P30+
Genotype	WT (n = 26)	KO (n = 24)	p-value	WT (n = 13)	KO (n = 18)	p-value
# branch points	71.27 ± 3.55	80.75 ± 4.32	0.095	100.85 ± 10.05	99.33 ± 6.29	0.89
stalk length (µm)	46.44 ± 1.09	46.38 ± 1.14	0.97	46.13 ± 2.02	46.05 ± 0.97	0.97
process length (µm)	553.16 ± 28.47	604.20 ± 37.86	0.28	717.86 ± 69.45	709.03 ± 46.66	0.91
# tips	84.81 ± 4.36	93.04 ± 4.81	0.21	119.23 ± 12.18	113.67 ± 7.56	0.69
convex hull area (µm2)	343.78 ± 23.71	411.57 ± 34.99	0.11	333.03 ± 26.95	344.78 ± 36.64	0.81
# branches off stalk	37.92 ± 1.33	32.21 ± 1.13	0.0021	45.77 ± 3.01	41.22 ±2.14	0.21
Unpaired t-tests were used to compare morphological properties between wild type (WT) and β2-nAChR-KO retinas. Related to Fig. 6D. Source data available in Figure 6-source data 1.
