# Supplementary figures and images for: Excitatory neurotransmission activates compartmentalized calcium transients in Müller glia without affecting lateral process motility
Source: eLife journal article supplement (doi:10.7554/elife.73202), 2021-12-16

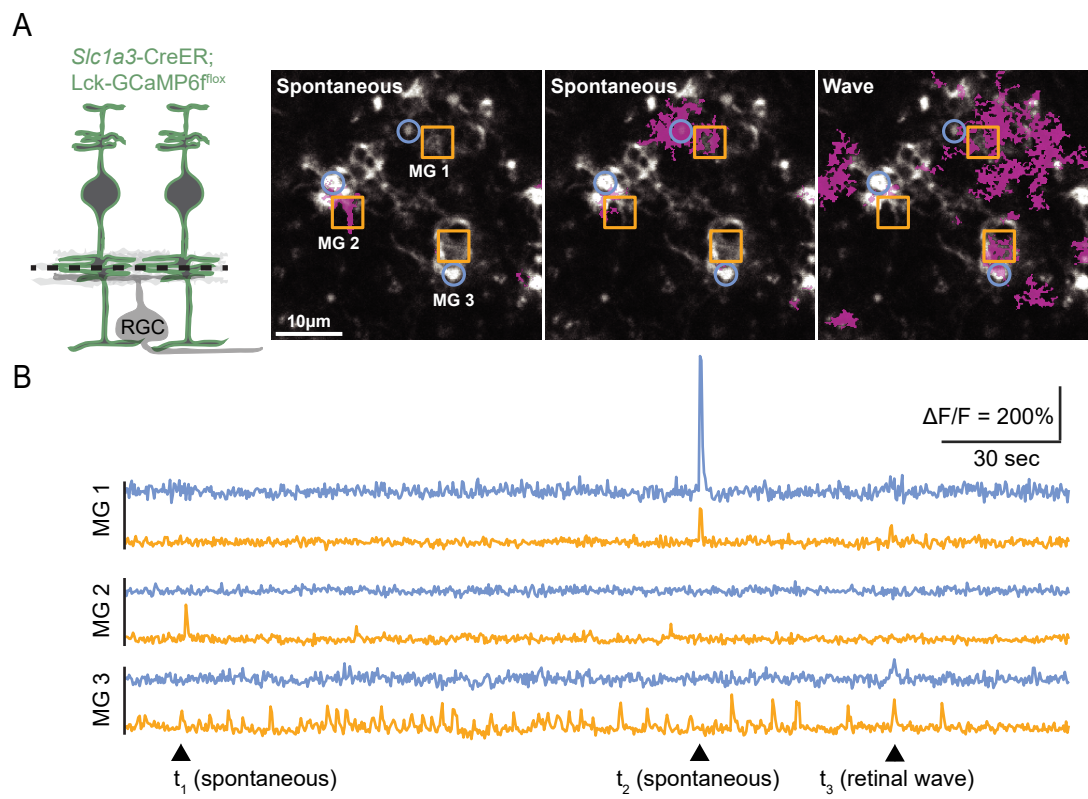

Supplement: supp [file elife-73202-supp-v1.zip]

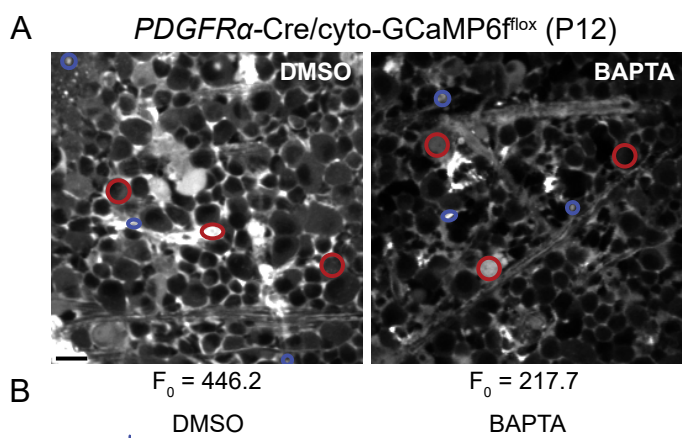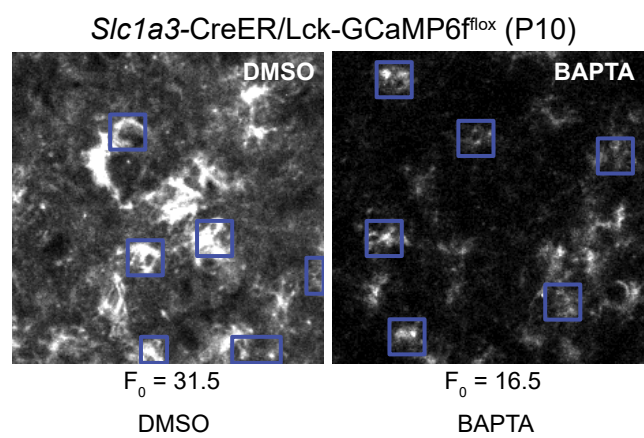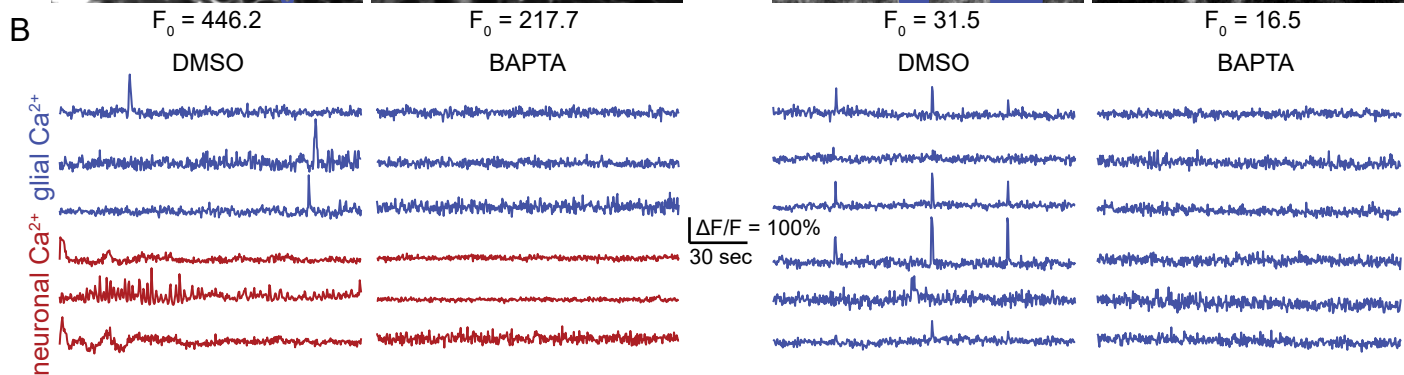

Supplement: supp [file elife-73202-supp-v1.zip]

A

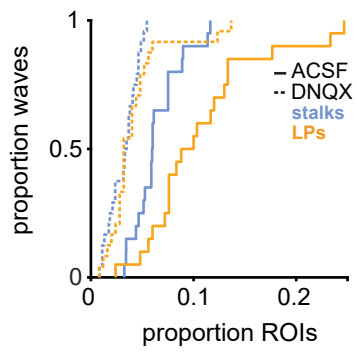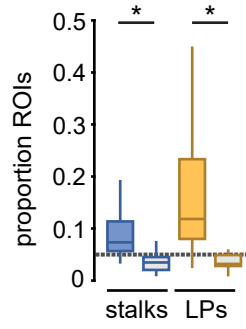

B

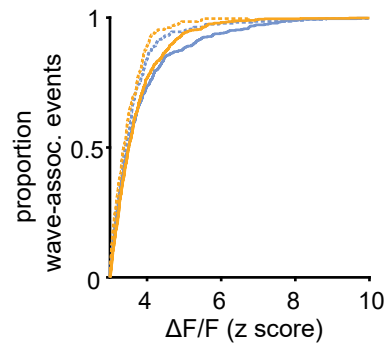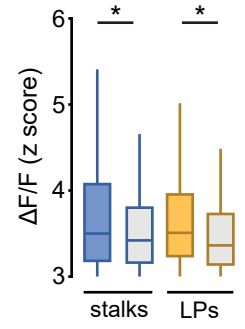

Supplement: supp [file elife-73202-supp-v1.zip]

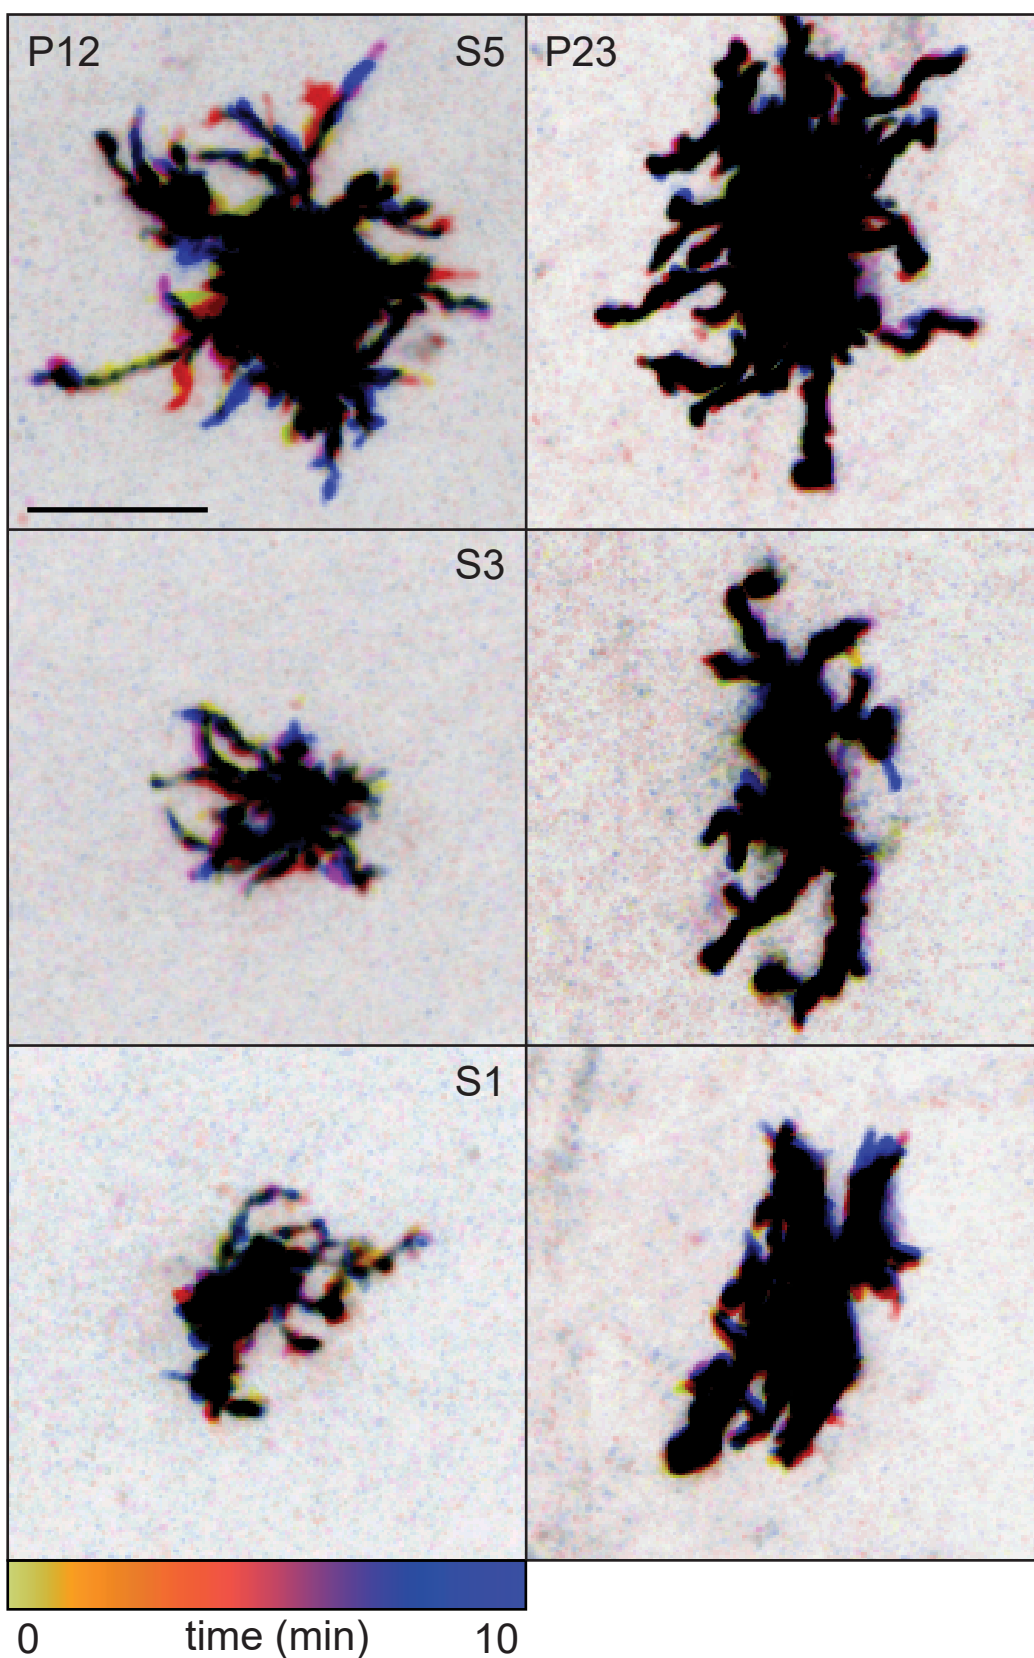

Supplement: supp [file elife-73202-supp-v1.zip]
